# Supplementary material for: Heterogeneous contributions of change in population distribution of body mass index to change in obesity and underweight
Source: eLife. 2021 Mar 9;10:e60060. doi: 10.7554/eLife.60060 (PMC7943191; doi:10.7554/eLife.60060)
Supplement: Source data 1. [file elife-60060-data1.xlsx]

## Sheet: Codebook
This workbook contains a publicly available subset of the survey data used to calculate NCD-RisC change of contribution of mean BMI to change in prevalence of underweight, obesity and severe obesity.
Additional metadata for all data used in the analysis, including data not included in the "Survey data" tab, can be found in the tab "Survey metadata."
Meta-data and survey data may be linked by using the unique survey identifier called id_study in each tab.
Cite the following when using the data or information contained in this workbook:
	Heterogeneous contributions of change in population distribution of body-mass index to change in obesity and underweight. eLife 2021
The variables in the "Survey data" tabs are as follows:
Variable	Value	Definition
iso		country 3-letter iso code
id_study		unique study identifier
sex	1	male
	2	female
age		mid-point of age range
N_bmi		sample size. Note that height and weight are measured in all cases.
mean_bmi		mean BMI
se_bmi		standard error of mean BMI (taking into account complex survey design, if possible)
prev_bmi_185less		prevalence of underweight (BMI < 18.5 kg/m2)
prev_bmi_30plus		prevalence of total obesity (BMI ≥ 30 kg/m2)
prev_bmi_35plus		prevalence of severe obesity (BMI ≥ 35 kg/m2)
mid_year		mid-year of data collection
urban_rural	rural	stratum contains only rural individuals
	urban	stratum contains only urban individuals
	mixed	stratum contains a mixture of urban and rural individuals
survey_type		Survey representativeness
	National	nationally representative
	Subnational	representative of at least 3 areas within a country
	Community	representative of one or two areas in a country
Country		country name
Superregion		world region used for analysis (see NCD-RisC, 2021 online appendix for countries included in each superregion)

## Sheet: Survey metadata
id_study	Country	Data years	Survey/study name/citation	Level of representative-ness	Rural, urban or both	Age range as used for global analysis		Sample size as used for global analysis		Access to data used for global analysis
						Male	Female	Male	Female
AFG_2018_STEPS	Afghanistan	2018	STEPS	National	Both	18-69	18-69	1984	1703	included in 'Survey data' tab
AFG_2013_NNS	Afghanistan	2013	National Nutrition Survey	National	Both		10-49		18433	contact
ALB_2009_DHS	Albania	2008-2009	DHS	National	Both	15-49	15-49	2978	7386	included in 'Survey data' tab
ALB_2018_DHS	Albania	2017-2018	DHS	National	Both	15-59	15-59	5953	14447	included in 'Survey data' tab
ALB_2001_8008008	Albania	2001	Shapo et al., Public Health Nutr 6:471-77, 2003	Community	Urban	24+	24+	535	585	contact
DZA_2003_STEPS	Algeria	2003	STEPS	Subnational	Both	25-64	25-64	1612	2437	included in 'Survey data' tab
DZA_2017_STEPS	Algeria	2016-2017	STEPS	National	Both	18-69	18-69	2991	3636	included in 'Survey data' tab
DZA_2005_TAHINA	Algeria	2005	Transition and Health Impact in North Africa	National	Both	35-70	35-70	2004	2741	contact
DZA_2008_ISOR	Algeria	2007-2009	The ISOR (InSulino-resistance in ORan) study	Community	Urban	30-64	30-64	378	409	contact
ASM_2004_STEPS	American Samoa	2004	STEPS	National	Both	25-64	25-64	949	1060	included in 'Survey data' tab
ASM_1990_citMcGARVEY	American Samoa	1990	McGarvey, Pac Health Dialog 8(1):157-62, 2001	National	Both	25+	25+	359	484	contact
ASM_1992_citMcGARVEY	American Samoa	1992	McGarvey, Pac Health Dialog 8(1):157-62, 2002	National	Both	27+	27+	232	337	contact
ASM_1994_citMcGARVEY	American Samoa	1994	McGarvey, Pac Health Dialog 8(1):157-62, 2001	National	Both	29+	29+	165	245	contact
ARG_1985_INTERSALT	Argentina	1985-1986	INTERSALT	Community	Urban	20-59	20-59	100	100	included in 'Survey data' tab
ARG_1997_13032002	Argentina	1995-1998	de Sereday et al., Diabetes Metab 30:335-9, 2004	Subnational	Urban	15-74	15-74	924	1246	contact
ARG_2003_13032035	Argentina	2003	CEDES-Programa VIGI+A-Banco Mundial, 2004	Community	Urban	15-74	15-74	151	176	contact
ARG_2005_CARMELA	Argentina	2004-2005	Cardiovascular Risk factors Multiple Evaluation in Latin America	Community	Urban	25-64	25-64	733	742	contact
ARG_2005_ENNyS	Argentina	2005	Encuensta Nacional de Nutrición y Salud 2005	National	Both		10-49		6581	contact
ARG_2006_13032034	Argentina	2006	Virasoro Survey	Community	Urban	15-84	15-84	261	306	contact
ARG_2010_VELA	Argentina	2008-2011	The VELA Project	Community	Rural	5+	5+	380	543	contact
ARG_2011_EANCABA	Argentina	2011	Primera Encuesta Alimentaria y Nutricional de la Ciudad Autónoma de Buenos Aires - EAN CABA	Community	Urban	5-18; 60+	5-49; 60+	1173	2229	contact
ARG_2012_CESCAS	Argentina	2011-2012	CESCAS Study	Community	Urban	30-79	30-79	1584	2378	contact
ARG_2013_EANRosario	Argentina	2012-2013	Primer estudio sobre el estado nutricional y los hábitos alimentarios de la población adulta de Rosario	Community	Urban	18-70	18-70	371	823	contact
ARG_2018_ENFR	Argentina	2018	Encuesta Nacional de Factores de Riesgo 2018	National	Both	18+	18+	6960	9449	contact
ARM_2000_DHS	Armenia	2000	DHS	National	Both		15-49		5982	included in 'Survey data' tab
ARM_2005_DHS	Armenia	2005	DHS	National	Both	15-49	15-49	1220	6232	included in 'Survey data' tab
ARM_2016_DHS	Armenia	2015-2016	DHS	National	Both		15-49		5731	included in 'Survey data' tab
ARM_2016_STEPS	Armenia	2016	STEPS	National	Both	18-69	18-69	604	1447	included in 'Survey data' tab
ARM_1998_citBranca	Armenia	1998	The health and nutritional status of children and women in Armenia	National	Both		18-45		2420	contact
AUS_1989_MONICA-NEWa	Australia	1988-1989	MONICA, Newcastle	Subnational	Urban	35-64	35-64	672	671	included in 'Survey data' tab
AUS_1989_MONICA-NEWa-Y	Australia	1988-1989	MONICA, Newcastle	Community	Urban	25-34	25-34	70	84	included in 'Survey data' tab
AUS_1994_MONICA-NEWa	Australia	1994	MONICA, Newcastle	Subnational	Urban	35-64	35-64	637	688	included in 'Survey data' tab
AUS_1994_MONICA-PER2	Australia	1994	MONICA, Perth inner	Community	Urban	25-64	25-64	363	349	included in 'Survey data' tab
AUS_1994_MONICA-PER3	Australia	1994	MONICA, Perth outer	Community	Urban	25-64	25-64	373	387	included in 'Survey data' tab
AUS_1989_DSAE	Australia	1988-1989	Dubbo Study of Australian Elderly	Community	Urban	59+	59+	877	1219	contact
AUS_1989_RFPS	Australia	1989	Risk Factor Prevalence Study	National	Urban	20-69	20-69	4497	4678	contact
AUS_1992_APCSC-ALSA	Australia	1992-1993	Australia Longitudinal Study of Ageing	Community	Urban	65+	65+	814	746	contact
AUS_1995_NNS	Australia	1995	National Nutrition Survey 1995	National	Both	5+	5+	5983	6390	contact
AUS_1997_APCSC-AAASP	Australia	1996-1998	Western Australian AAA Screening Program	Community	Urban	65-84		12194		contact
AUS_2000_6036021	Australia	2000	Perth children	Community	Both	25	25	266	334	contact
AUS_2000_AusDiab	Australia	1999-2000	The Australian Diabetes, Obesity and Lifestyle Study 1999-2000	National	Both	25+	25+	4991	6070	contact
AUS_2001_NWAHS	Australia	1999-2003	North West Adelaide Health Study	Community	Urban	18+	18+	1932	2122	contact
AUS_2005_6036045	Australia	2004-2005	Janus et al., Med J Aust 187:147-52, 2007	Community	Rural	25-74	25-74	383	423	contact
AUS_2005_AusDiab	Australia	2004-2005	The Australian Diabetes, Obesity and Lifestyle Study 2004-2005	National	Both	30+	30+	2874	3472	contact
AUS_2005_NWAHS	Australia	2004-2006	North West Adelaide Health Study	Community	Urban	20+	20+	1523	1679	contact
AUS_2008_NHS	Australia	2007-2008	National Health Survey	National	Both	18+	18+	5279	5655	contact
AUS_2009_NWAHS	Australia	2008-2010	North West Adelaide Health Study	Community	Urban	24+	24+	1168	1318	contact
AUS_2012_AHS	Australia	2011-2013	Australian Health Survey 2011-13	National	Both	5+	5+	12190	13011	contact
AUS_2012_AusDiab	Australia	2012	The Australian Diabetes, Obesity and Lifestyle Study 2012	National	Both	37+	37+	2048	2530	contact
AUS_2018_NHS	Australia	2017-2018	National Health Survey	National	Both	18+	18+	7576	8729	contact
AUT_1986_10040051	Austria	1986	CINDI	Community	Both	25-64	25-64	657	715	contact
AUT_1991_CINDI	Austria	1991	CINDI survey Vorarlberg/Austria	Subnational	Both	25-64	25-64	698	738	contact
AUT_1992_VHMPP	Austria	1992	Vorarlberg Health Monitoring and Promotion Programme	Subnational	Both	18+	18+	14161	18835	contact
AUT_1998_VHMPP	Austria	1998	Vorarlberg Health Monitoring and Promotion Programme	Subnational	Both	18+	18+	16153	20915	contact
AUT_1999_CINDI	Austria	1998-1999	CINDI survey Vorarlberg/Austria	Subnational	Both	25-64	25-64	409	414	contact
AUT_2004_VHMPP	Austria	2004	Vorarlberg Health Monitoring and Promotion Programme	Subnational	Both	18+	18+	20160	23893	contact
AUT_2011_ASNS	Austria	2010-2012	Austrian Study on Nutritional Status 2012	National	Both	6-80	6-80	363	446	contact
AZE_2006_DHS	Azerbaijan	2006	DHS	National	Both	15-59	15-49	2493	7868	included in 'Survey data' tab
AZE_2017_STEPS	Azerbaijan	2017	STEPS	National	Both	18-69	18-69	1117	1577	included in 'Survey data' tab
AZE_1996_HNS	Azerbaijan	1996	Health and Nutrition Survey	National	Both	19-59	19-59	121	295	contact
AZE_2001_RHS	Azerbaijan	2001	Reproductive Health Survey (RHS)	National	Both		15-44		1726	contact
BHS_2012_STEPS	Bahamas	2011-2012	STEPS	National	Both	25-64	25-64	586	938	included in 'Survey data' tab
BHR_1992_15048052	Bahrain	1991-1992	al-Mannai et al., J R Soc Health 116:30-2, 7-40, 1996	Community	Both	20+	20+	137	153	contact
BHR_1995_15048020	Bahrain	1995	Musaiger et al., Ann Hum Biol 28:346-50, 2001	Community	Both	30+	30+	298	216	contact
BHR_1999_NNS	Bahrain	1998-1999	National Nutrition Survey	National	Both	19+	19+	1120	1181	contact
BHR_2007_STEPS	Bahrain	2007	STEPS	National	Both	20-64	20-64	854	858	contact
BGD_1997_DHS	Bangladesh	1996-1997	DHS	National	Both		20-49		3384	included in 'Survey data' tab
BGD_2000_DHS	Bangladesh	1999-2000	DHS	National	Both		20-49		3887	included in 'Survey data' tab
BGD_2004_DHS	Bangladesh	2004	DHS	National	Both		20-49		9165	included in 'Survey data' tab
BGD_2007_DHS	Bangladesh	2007	DHS	National	Both		20-49		9037	included in 'Survey data' tab
BGD_2010_STEPS	Bangladesh	2009-2010	STEPS	National	Both	25+	25+	4310	4849	included in 'Survey data' tab
BGD_2011_DHS	Bangladesh	2011	DHS	National	Both	15+	20+	5254	16679	included in 'Survey data' tab
BGD_2013_STEPS	Bangladesh	2013	STEPS	National	Both	25+	25+	1812	2261	included in 'Survey data' tab
BGD_2014_DHS	Bangladesh	2014	DHS	National	Both		20-49		14963	included in 'Survey data' tab
BGD_2018_STEPS	Bangladesh	2018	STEPS	National	Both	18-69	18-69	3784	4229	included in 'Survey data' tab
BGD_1992_4050013	Bangladesh	1992	Rahman et al., Hypertension 33:74-8, 1999	Community	Rural	30+	30+	965	643	contact
BGD_1998_4050035	Bangladesh	1998	Zaman et al., J Health Popul Nutr 21:162-63, 2003	Community	Rural	20+	20+	290	379	contact
BGD_2000_4050061	Bangladesh	1999-2000	Hussain et al., Eur J Public Health, 17:291-96, 2007	Community	Rural	20-59	20-59	2037	2720	contact
BGD_2002_ NSP	Bangladesh	2000-2004	Nutritional Surveillance Project	National	Rural		15-45		224251	contact
BGD_2002_STEPSrural	Bangladesh	2002	STEPS	National	Rural	25-64	25-64	2086	2038	contact
BGD_2002_STEPSurban	Bangladesh	2002	STEPS	National	Urban	25-64	25-64	3533	3737	contact
BGD_2006_UHS	Bangladesh	2006	Urban Health Survey	Subnational	Urban	20-59	20-59	6109	5898	contact
BGD_2015_BRAC	Bangladesh	2015	An Assessment of BRAC Health Nutrition and Population Programme and Benchmark Survey of Sustainable Development Goal – 2015	National	Rural	35+	11+	5432	18378	contact
BGD_2019_NNS	Bangladesh	2018-2019	National Nutrition Surveillence	National	Both	10+	10+	12211	12102	contact
BRB_2000_SABE	Barbados	1999-2000	The Survey on Health, Well-Being, and Aging in Latin America and the Caribbean (SABE)	Community	Urban	60+	60+	559	866	included in 'Survey data' tab
BRB_1990_BES	Barbados	1987-1992	Barbados Eye Study	National	Both	40-84	40-84	1980	2627	contact
BRB_1993_7052001	Barbados	1991-1994	Cooper et al., Am J Public Health 87(2):160-68, 1997	Community	Urban	25-100	25-100	329	482	contact
BRB_2000_BISED II	Barbados	1997-2002	The Barbados Incidence Studies of Eye Diseases II	National	Both	40-84	40-84	1004	1441	contact
BRB_2012_HotN	Barbados	2011-2013	Health of the Nation (HotN)	National	Both	25+	25+	455	703	contact
BLR_2017_STEPS	Belarus	2016-2017	STEPS	National	Both	18-69	18-69	2085	2894	included in 'Survey data' tab
BEL_1986_INTERSALT-Charleroi	Belgium	1985-1987	INTERSALT, Charleroi	Community	Urban	20-59	20-59	82	75	included in 'Survey data' tab
BEL_1986_INTERSALT-Ghent	Belgium	1985-1986	INTERSALT, Ghent	Community	Urban	20-59	20-59	100	100	included in 'Survey data' tab
BEL_1986_MONICA-CHAa	Belgium	1985-1987	MONICA, Charleroi	Community	Urban	25-64	25-64	347	327	included in 'Survey data' tab
BEL_1986_MONICA-GHEa	Belgium	1985-1987	MONICA, Ghent	Community	Urban	25-64	25-64	549	459	included in 'Survey data' tab
BEL_1989_MONICA-CHAa	Belgium	1987-1990	MONICA, Charleroi	Community	Urban	25-64	25-64	325	301	included in 'Survey data' tab
BEL_1989_MONICA-GHEa	Belgium	1988-1990	MONICA, Ghent	Community	Urban	25-64	25-64	456	449	included in 'Survey data' tab
BEL_1991_MONICA-CHAa	Belgium	1990-1993	MONICA, Charleroi	Community	Urban	25-64	25-64	337	332	included in 'Survey data' tab
BEL_1991_MONICA-GHEa	Belgium	1990-1992	MONICA, Ghent	Community	Urban	25-64	25-64	507	475	included in 'Survey data' tab
BEL_1985_BIRNH	Belgium	1984-1985	Belgian Interuniversity Research on Nutrition and Health	National	Both	25-74	25-74	5897	5289	contact
BEL_1988_FLEMENGHO	Belgium	1985-1990	Flemish Study on Environment, Genes and Health Outcomes	Community	Rural	20-90	20-90	656	692	contact
BEL_1992_FLEMENGHO	Belgium	1991-1994	Flemish Study on Environment, Genes and Health Outcomes	Community	Rural	26-88	26-88	393	416	contact
BEL_1993_FLEMENGHO	Belgium	1992-1995	Flemish Study on Environment, Genes and Health Outcomes	Community	Rural	27-89	27-89	298	312	contact
BEL_1995_BIRNH-E	Belgium	1994-1996	BIRNH Elderly: Belgian Interuniversity Research on Nutrition and Health in the Elderly	National	Both	65-89	65-89	1142	953	contact
BEL_1997_FLEMENGHO	Belgium	1996-1998	Flemish Study on Environment, Genes and Health Outcomes	Community	Rural	10-84	10-84	404	402	contact
BEL_1998_FLEMENGHO	Belgium	1998	Flemish Study on Environment, Genes and Health Outcomes	Community	Rural	32-86	32-86	320	359	contact
BEL_1999_FLEMENGHO	Belgium	1998-2000	Flemish Study on Environment, Genes and Health Outcomes	Community	Rural	10-80	10-80	220	217	contact
BEL_2000_FLEMENGHO	Belgium	1999-2001	Flemish Study on Environment, Genes and Health Outcomes	Community	Rural	10-81	10-81	232	254	contact
BEL_2001_FLEMENGHO	Belgium	2001	Flemish Study on Environment, Genes and Health Outcomes	Community	Rural	10-78	10-78	242	222	contact
BEL_2002_FLEMENGHO	Belgium	2002-2003	Flemish Study on Environment, Genes and Health Outcomes	Community	Rural	10-81	10-81	174	197	contact
BEL_2003_10056123	Belgium	2002-2004	SPAH	Subnational	Both	18-75	18-75	2595	2308	contact
BEL_2003_EMAS	Belgium	2003	The European Male Ageing Study	Community	Both	40+		433		contact
BEL_2004_FLEMENGHO	Belgium	2002-2005	Flemish Study on Environment, Genes and Health Outcomes	Community	Rural	10-88	10-88	447	462	contact
BEL_2007_FLEMENGHO	Belgium	2005-2008	Flemish Study on Environment, Genes and Health Outcomes	Community	Rural	10-89	10-89	462	471	contact
BEL_2008_EMAS	Belgium	2008	The European Male Ageing Study	Community	Both	40+		383		contact
BEL_2011_FLEMENGHO	Belgium	2009-2013	Flemish Study on Environment, Genes and Health Outcomes	Community	Rural	20-88	20-88	330	335	contact
BEL_2013_FLEMENGHO	Belgium	2010-2015	Flemish Study on Environment, Genes and Health Outcomes	Community	Rural	15-87	15-87	388	410	contact
BEL_2015_FCS	Belgium	2014-2015	Food Consumption Survey	National	Urban	5-64	5-64	1481	1491	contact
BEL_2019_EHES	Belgium	2018-2019	European Health Examination Survey	National	Both	18+	18+	548	604	contact
BLZ_2005_CAMDI	Belize	2004-2005	CAMDI	National	Both	20+	20+	599	1018	contact
BEN_1996_DHS	Benin	1996	DHS	National	Both		20-49		2137	included in 'Survey data' tab
BEN_2001_DHS	Benin	2001	DHS	National	Both		15-49		5449	included in 'Survey data' tab
BEN_2006_DHS	Benin	2006	DHS	National	Both		15-49		14891	included in 'Survey data' tab
BEN_2007_STEPS	Benin	2007	STEPS	Community	Urban	25-64	25-64	955	1508	included in 'Survey data' tab
BEN_2008_STEPS	Benin	2008	STEPS	National	Both	25-64	25-64	3430	3365	included in 'Survey data' tab
BEN_2012_DHS	Benin	2011-2012	DHS	National	Both		15-49		14589	included in 'Survey data' tab
BEN_2015_STEPS	Benin	2015	STEPS	National	Both	18-69	18-69	2304	2543	included in 'Survey data' tab
BEN_2018_DHS	Benin	2017-2018	DHS	National	Both		15-49		7180	included in 'Survey data' tab
BTN_2007_STEPS	Bhutan	2007	STEPS	Community	Urban	25-74	25-74	1125	1322	included in 'Survey data' tab
BTN_2014_STEPS	Bhutan	2014	STEPS	National	Both	18-69	18-69	1069	1674	included in 'Survey data' tab
BOL_1994_DHS	Bolivia	1994	DHS	National	Both		20-49		2128	included in 'Survey data' tab
BOL_1998_DHS	Bolivia	1998	DHS	National	Both		20-49		3939	included in 'Survey data' tab
BOL_2003_DHS	Bolivia	2003	DHS	National	Both		15-49		16349	included in 'Survey data' tab
BOL_2008_DHS	Bolivia	2008	DHS	National	Both		15-49		15543	included in 'Survey data' tab
BIH_2002_NCDRFS	Bosnia and Herzegovina	2002	Non-communicable disease risk factor survey, Federation of B&H	Subnational	Both	25-64	25-64	1118	1613	contact
BIH_2012_NCDRFS_rural	Bosnia and Herzegovina	2012	Non-communicable disease risk factor survey, Federation of B&H	Subnational	Rural	18+	18+	1191	1274	contact
BIH_2012_NCDRFS_urban	Bosnia and Herzegovina	2012	Non-communicable disease risk factor survey, Federation of B&H	Subnational	Urban	18+	18+	591	697	contact
BWA_2007_STEPS	Botswana	2007	STEPS	National	Both	25-64	25-64	1243	2577	included in 'Survey data' tab
BWA_2014_STEPS	Botswana	2014	STEPS	National	Both	15-69	15-69	1298	2602	included in 'Survey data' tab
BRA_1996_DHS	Brazil	1996	DHS	National	Both		20-49		2884	included in 'Survey data' tab
BRA_2000_SABE	Brazil	1999-2000	The Survey on Health, Well-Being, and Aging in Latin America and the Caribbean (SABE)	Community	Urban	60+	60+	732	1064	included in 'Survey data' tab
BRA_2013_PNS	Brazil	2013	Pesquisas Nacional de Saude	National	Both	18+	18+	24918	32351	included in 'Survey data' tab
BRA_1989_PNSN	Brazil	1989	Pesquisa Nacional sobre Saude e Nutricao	National	Both	5+	5+	26642	27504	contact
BRA_1991_14076043	Brazil	1990-1991	Fornes et al., Rev Saude Publica 36:12-8, 2002	Community	Urban	20+	20+	432	613	contact
BRA_1992_14076044	Brazil	1991-1993	EPIDOSO	Community	Urban	65+	65+	269	473	contact
BRA_1995_14076010	Brazil	1992-1998	Moraes et al., Int J Cardiol 90:205-11, 2003	Community	Urban	18+	18+	438	543	contact
BRA_1995_14076016	Brazil	1995	Health and Nutrition Survey of Rio de Janeiro	Community	Urban	60+	60+	248	385	contact
BRA_1996_PA	Brazil	1995-1996	Cohort study from Porto Alegre	Community	Urban	18+	18+	489	596	contact
BRA_1996_PPV	Brazil	1996-1997	Pesquisa sobre Padrões de Vida (PPV)	Subnational	Both	5+	5+	7451	8466	contact
BRA_1997_14076037	Brazil	1997	PPV	Subnational	Both	20+	20+	8063	9121	contact
BRA_1997_Bambui	Brazil	1996-1997	The Bambui Cohort Study of Ageing	Community	Urban	18+	18+	931	1335	contact
BRA_2000_PNS	Brazil	1999-2000	Pelotas cross-sectional survey	Community	Urban	20-69	20-69	839	1096	contact
BRA_2000_riogrande	Brazil	1999-2000	Prevalence of Risk Factors for Coronary Artery Disease in the State of Rio Grande do Sul	Subnational	Urban	20+	20+	504	548	contact
BRA_2001_14076023	Brazil	2001	de Freitas et al., Arq Bras Cardiol 88:191-99	Community	Urban	15+	15+	310	331	contact
BRA_2002_14076034	Brazil	2001-2003	Bustos et al., Nutr Metab Cardiovasc Dis 17:581-89, 2007	Community	Both	22-28	22-28	992	1064	contact
BRA_2003_14076021	Brazil	2003	PNAFS	Community	Urban	20+	20+	1155	1941	contact
BRA_2003_POF	Brazil	2002-2003	Pesquisa de Orcamentos Familiares	National	Both	5+	5+	81152	80163	contact
BRA_2003_WHSB	Brazil	2003	Women Health in Southern Brazil	Community	Urban		20-60		986	contact
BRA_2004_CAJUVDG	Brazil	2004	Caju & Virgen das Gracas	Community	Rural	18+	18+	291	286	contact
BRA_2004_RibeiraPreto	Brazil	2002-2004	Ribeira Preto Birth Cohort	Community	Urban	22-25	22-25	1012	1082	contact
BRA_2004_SPAH	Brazil	2003-2005	São Paulo Health and Ageing Study	Community	Urban	65+	65+	783	1198	contact
BRA_2005_HOB	Brazil	2004-2006	Hearts of Brazil	National	Urban	18+	18+	550	626	contact
BRA_2005_PBC82	Brazil	2004-2005	The 1982 Pelotas (Brazil) Birth Cohort: 23 years follow-up	Community	Urban	23	23	2173	1935	contact
BRA_2005_SOFT	Brazil	2005	Syndrome of Obesity and Risk Factors for Cardiovascular Disease Study	Community	Urban	18-100	18-100	739	1094	contact
BRA_2006_14076045	Brazil	2006	Krause et al., J Aging Phys Act 17:387-97, 2009	Community	Urban	60+	60+	93	1069	contact
BRA_2006_ATITUDE	Brazil	2006	ATITUDE	Subnational	Both	14-21	14-21	2406	3484	contact
BRA_2006_PNDS	Brazil	2006	Pesquisa Nacional de Demografia e Saude 2006	National	Both		15-49		14783	contact
BRA_2008_Bambui	Brazil	2008	The Bambui Cohort Study of Ageing	Community	Urban	71+	71+	248	456	contact
BRA_2008_CAJUVDG	Brazil	2008	Caju & Virgen das Gracas	Community	Rural	18+	18+	273	287	contact
BRA_2009_POF	Brazil	2008-2009	Pesquisa de Orcamentos Familiares	National	Both	5+	5+	85725	88156	contact
BRA_2010_EPIFLORIPA	Brazil	2009-2010	EpiFloripa Cohort Study of Ageing - Wave 1	Community	Urban	60+	60+	592	1047	contact
BRA_2010_EPIFLORIPA-ADULT	Brazil	2009-2010	EpiFloripa Adults Cohort Study (EpiFloripa)	Community	Urban	20-59	20-59	755	940	contact
BRA_2010_SP	Brazil	2010	San Pedro	Community	Rural	18+	18+	153	214	contact
BRA_2012_EPIFLORIPA-ADULT	Brazil	2012	EpiFloripa Adults Cohort Study (EpiFloripa)	Community	Urban	22-62	22-62	486	655	contact
BRA_2013_BHS	Brazil	2010-2015	Baependi Heart Study	Community	Rural	18+	18+	1002	1357	contact
BRA_2013_PBC-30	Brazil	2012-2013	The 1982 Pelotas (Brazil) Birth Cohort: 30 years follow-up	Community	Urban	30	30	1753	1798	contact
BRA_2013_PrevLeptin	Brazil	2012-2013	Prevalence of Leptin Polymorphism Gln223Arg	Community	Urban	18+	18+	282	523	contact
BRA_2013_riogrande	Brazil	2011-2014	Profile of risk factors for coronary arterial disease in rio grande do sul - revaluation after 10 years	Subnational	Urban	20+	20+	364	466	contact
BRA_2014_EPIFLORIPA	Brazil	2013-2014	EpiFloripa Cohort Study of Ageing - Wave 2	Community	Urban	63+	63+	404	744	contact
BRA_2015_EPIFLORIPAADULT	Brazil	2014-2015	EpiFloripa Adults Cohort Study (EpiFloripa)	Community	Urban	25-65	25-65	353	476	contact
BRA_2016_ELSI	Brazil	2015-2016	Brazilian Longitudinal Study of the Elderly Health and Wellness	National	Both	50+	50+	3937	5064	contact
BRA_2016_PBC93	Brazil	2015-2016	The 1993 Pelotas (Brazil) Birth Cohort: 22 years follow-up	Community	Urban	21-23	21-23	1687	1872	contact
BRA_2017_HRE	Brazil	2017	HealthRise Evaluation	Subnational	Both	30+	30+	599	1169	contact
BRA_2017_SPP	Brazil	2016-2017	Study in Presidente Prudente	Community	Urban	18+	18+	304	481	contact
BRA_2018_EPIFLORIPA	Brazil	2017-2018	EpiFloripa Cohort Study of Ageing - Wave 3	Community	Urban	60+	60+	361	635	contact
BRA_2019_santoanastacio	Brazil	2018-2019	Epidemiology in the health (Santo Anastácio Edition)	Community	Urban	18+	18+	105	145	contact
BRN_2011_NHANSS	Brunei Darussalam	2010-2011	National Health And Nutritional Status Survey (NHANSS)	National	Both	5-75	5-75	1027	1157	contact
BRN_2016_NNCDS	Brunei Darussalam	2015-2016	National Non-Communicable Diseases Survey (NNCDS)	National	Both	18-69	18-69	814	1075	contact
BGR_2004_NNS	Bulgaria	2004	National Nutrition Survey	National	Both	15+	15+	515	515	contact
BFA_1993_DHS	Burkina Faso	1992-1993	DHS	National	Both		20-49		3190	included in 'Survey data' tab
BFA_1999_DHS	Burkina Faso	1998-1999	DHS	National	Both		20-49		3114	included in 'Survey data' tab
BFA_2003_DHS	Burkina Faso	2003	DHS	National	Both		15-49		11001	included in 'Survey data' tab
BFA_2010_DHS	Burkina Faso	2010	DHS	National	Both		15-49		7755	included in 'Survey data' tab
BFA_2013_STEPS	Burkina Faso	2013	STEPS	National	Both	25-64	25-64	2223	2250	included in 'Survey data' tab
BFA_2002_VASN	Burkina Faso	2002	Vulnérabilité Alimentaire et Sécurité Nutritionnelle dans la Gnagna (VASN-Gnagna)	Subnational	Rural	5+	5+	1471	3522	contact
BFA_2004_21854030	Burkina Faso	2004	Ouedraogo et al., Public Health Nutr 11:1280-87, 2008	Community	Urban	35+	35+	956	1066	contact
BDI_2010_DHS	Burundi	2010	DHS	National	Both		15-49		4188	included in 'Survey data' tab
BDI_2017_DHS	Burundi	2016-2017	DHS	National	Both		15-49		7909	included in 'Survey data' tab
CPV_2007_STEPS	Cabo Verde	2007	STEPS	National	Both	25-64	25-64	658	1066	included in 'Survey data' tab
KHM_2000_DHS	Cambodia	2000	DHS	National	Both		15-49		6915	included in 'Survey data' tab
KHM_2005_DHS	Cambodia	2005	DHS	National	Both		15-49		8130	included in 'Survey data' tab
KHM_2010_DHS	Cambodia	2010	DHS	National	Both		15-49		8856	included in 'Survey data' tab
KHM_2010_STEPS	Cambodia	2010	STEPS	National	Both	25-64	25-64	1881	3344	included in 'Survey data' tab
KHM_2014_DHS	Cambodia	2014	DHS	National	Both		15-49		10821	included in 'Survey data' tab
KHM_2008_CAS	Cambodia	2008	Anthropometrics Survey	National	Both		15-49		5955	contact
CMR_1998_DHS	Cameroon	1998	DHS	National	Both		20-49		1429	included in 'Survey data' tab
CMR_2003_STEPS	Cameroon	2003	STEPS	Subnational	Urban	15+	15+	3672	5490	included in 'Survey data' tab
CMR_2004_DHS	Cameroon	2004	DHS	National	Both		15-49		4646	included in 'Survey data' tab
CMR_2011_DHS	Cameroon	2011	DHS	National	Both		15-49		7343	included in 'Survey data' tab
CMR_2019_DHS	Cameroon	2018-2019	DHS	National	Both		15-64		6255	included in 'Survey data' tab
CMR_1999_ENHIP_rural	Cameroon	1998-1999	ENHIP	Community	Rural	15+	15+	523	738	contact
CMR_1999_ENHIP_urban	Cameroon	1998-1999	ENHIP	Community	Urban	15+	15+	523	640	contact
CMR_2007_CAMBOD2	Cameroon	2007	Cameroon Burden of Diabetes - Second Survey	Subnational	Urban	18+	18+	3345	4633	contact
CMR_2009_NSMSCFF	Cameroon	2009	National Survey of Micronutrient Status and Consumption of Fortifiable Foods	National	Both		15-49		816	contact
CMR_2011_ANTRAC	Cameroon	2009-2012	Anthropologie nutritionnelle des migrants d'Afrique centrale à la ville et en France	Subnational	Both	18-76	18-76	528	584	contact
CMR_2015_FarNorth	Cameroon	2014-2015	Cardiovascular risk factors screening in urban and rural areas in the Far-North Region Cameroon	Subnational	Both	20+	20+	520	369	contact
CAN_1985_INTERSALT-StJohns	Canada	1985-1986	INTERSAL, StJohns	Community	Urban	20-59	20-59	100	100	included in 'Survey data' tab
CAN_1987_MONICA-HALa	Canada	1985-1988	MONICA, Halifax	Community	Both	25-64	25-64	438	420	included in 'Survey data' tab
CAN_1995_MONICA-HALa	Canada	1995	MONICA, Halifax	Community	Both	25-64	25-64	274	287	included in 'Survey data' tab
CAN_1989_CHHS	Canada	1986-1992	Canada Heart Health Survey	National	Both	18-74	18-74	9644	9777	contact
CAN_1993_16124010	Canada	1993	Chen et al., Int J Obes Relat Metab Disord 22:771-77, 1998	Community	Rural	18-74	18-74	803	988	contact
CAN_1996_CaMos	Canada	1995-1997	Canadian Multicentre Osteoporosis Study (CaMos)	Subnational	Both	35+	25+	2616	6343	contact
CAN_1997_16124039	Canada	1997	PEI Nutrition Survey	Subnational	Both	18-74	18-74	1000	995	contact
CAN_2005_16124026	Canada	2005	CCHS	National	Both	15+	15+	1684.11	2030.82	contact
CAN_2006_CaMos	Canada	2005-2008	Canadian Multicentre Osteoporosis Study (CaMos)	Subnational	Both	35+	35+	1486	3661	contact
CAN_2008_16124026	Canada	2008	CCHS	National	Both	15+	15+	1689.48	1987.78	contact
CAN_2008_CHMS	Canada	2007-2009	Canadian Health Measures Survey, Cycle 1	National	Both	6-79	6-79	2703	2864	contact
CAN_2010_CHMS	Canada	2009-2011	Canadian Health Measures Survey, Cycle 2	National	Both	5-79	5-79	2870	3086	contact
CAN_2013_CHMS	Canada	2012-2013	Canadian Health Measures Survey, Cycle 3	National	Both	5-79	5-79	2670	2676	contact
CAN_2015_CHMS	Canada	2014-2015	Canadian Health Measures Survey, Cycle 4	National	Both	5-79	5-79	2697	2674	contact
CAN_2017_CHMS	Canada	2016-2017	Canadian Health Measures Survey, Cycle 5	National	Both	6-79	6-79	2571	2564	contact
CAF_1995_DHS	Central African Republic	1994-1995	DHS	National	Both		20-49		1760	included in 'Survey data' tab
CAF_2010_STEPS	Central African Republic	2010	STEPS	Subnational	Both	25-64	25-64	1846	1967	included in 'Survey data' tab
TCD_1997_DHS	Chad	1996-1997	DHS	National	Both		20-49		3262	included in 'Survey data' tab
TCD_2004_DHS	Chad	2004	DHS	National	Both		20-49		2618	included in 'Survey data' tab
TCD_2008_STEPS	Chad	2008	STEPS	Community	Urban	25-64	25-64	995	845	included in 'Survey data' tab
TCD_2015_DHS	Chad	2014-2015	DHS	National	Both		15-49		9733	included in 'Survey data' tab
CHL_2000_SABE	Chile	1999-2000	The Survey on Health, Well-Being, and Aging in Latin America and the Caribbean (SABE)	Community	Urban	60+	60+	410	806	included in 'Survey data' tab
CHL_1989_13152001	Chile	1989	INCLEN	Community	Urban	35-65		199		contact
CHL_1993_citMiquel	Chile	1992-1993	Miquel et al., Gastroenterology 115: 937-46, 1998	Community	Urban	18+	18+	657	1031	contact
CHL_2000_citNervi	Chile	2000	Nervi et al., J Hepatol 45: 299 -305, 2006	Community	Urban	18+	18+	335	624	contact
CHL_2002_13152013	Chile	2001-2003	Bustos et al., Nutr Metab Cardiovasc Dis 17:581-89, 2007	Community	Both	22-28	22-28	436	562	contact
CHL_2003_ENS	Chile	2003	Encuesta Nacional de Salud	National	Both	17+	17+	1557	1867	contact
CHL_2005_13152033	Chile	2005	Palomo et al., Rev Med Chil 135:904-12, 2007	Community	Urban	18-74	18-74	339	668	contact
CHL_2005_CARMELA	Chile	2004-2005	Cardiovascular Risk factors Multiple Evaluation in Latin America	Community	Urban	25-64	25-64	783	865	contact
CHL_2010_ENS	Chile	2009-2010	Encuesta Nacional de Salud	National	Both	15+	15+	1935	2869	contact
CHL_2011_ENCA	Chile	2010-2011	Encuesta Nacional de Consumo Alimentario	National	Both	5+	5+	1840	2902	contact
CHL_2012_CESCAS	Chile	2011-2012	CESCAS Study	Community	Urban	30-79	30-79	922	1020	contact
CHL_2016_ENS	Chile	2016-2017	Encuesta Nacional de Salud	National	Both	15+	15+	1977	3420	contact
CHN_1985_SinoMONICA-BJ	China	1984-1985	Sino-MONICA Beijing	Community	Both	25-64	25-64	813	857	included in 'Survey data' tab
CHN_1986_INTERSALT-Beijing	China	1986	INTERSALT, Beijing	Community	Urban	20-59	20-59	100	100	included in 'Survey data' tab
CHN_1986_INTERSALT-Nanning	China	1986	INTERSALT, Nanning	Community	Both	20-59	20-59	100	100	included in 'Survey data' tab
CHN_1986_INTERSALT-Tianjin	China	1986	INTERSALT, Tianjin	Community	Urban	20-59	20-59	100	100	included in 'Survey data' tab
CHN_1989_CHNS	China	1989	China Health and Nutrition Study	National	Both	5-45	5-45	2554	2717	included in 'Survey data' tab
CHN_1991_CHNS	China	1991	China Health and Nutrition Study	National	Both	5+	5+	5584	5922	included in 'Survey data' tab
CHN_1993_CHNS	China	1993	China Health and Nutrition Study	National	Both	5+	5+	5370	5564	included in 'Survey data' tab
CHN_1997_CHNS	China	1997	China Health and Nutrition Study	National	Both	5+	5+	5551	5647	included in 'Survey data' tab
CHN_1997_INTERMAP-Beijing	China	1997	INTERMAP, Beijing	Community	Rural	40-59	40-59	133	139	included in 'Survey data' tab
CHN_1997_INTERMAP-Guangxi	China	1997	INTERMAP, Guangxi	Community	Rural	40-59	40-59	140	138	included in 'Survey data' tab
CHN_1997_INTERMAP-Shanxi	China	1997	INTERMAP, Shanxi	Community	Rural	40-59	40-59	143	146	included in 'Survey data' tab
CHN_2000_CHNS	China	2000	China Health and Nutrition Study	National	Both	5+	5+	5828	6100	included in 'Survey data' tab
CHN_2004_CHNS	China	2004	China Health and Nutrition Study	National	Both	5+	5+	5228	5517	included in 'Survey data' tab
CHN_2006_CHNS	China	2006	China Health and Nutrition Study	National	Both	5+	5+	4948	5399	included in 'Survey data' tab
CHN_2008_CHARLS	China	2008	China Health and Retirement Longitudinal Study (CHARLS), pilot survey	Subnational	Both	45+	45+	923	950	included in 'Survey data' tab
CHN_2009_CHNS	China	2009	China Health and Nutrition Study	National	Both	5+	5+	5176	5489	included in 'Survey data' tab
CHN_2009_SAGE	China	2007-2010	SAGE	National	Both	50+	50+	5759	6616	included in 'Survey data' tab
CHN_2011_CHARLS	China	2011-2012	China Health and Retirement Longitudinal Study (CHARLS), baseline survey	National	Both	45+	45+	6337	7003	included in 'Survey data' tab
CHN_2011_CHNS	China	2011	China Health and Nutrition Study	National	Both	5+	5+	6771	7477	included in 'Survey data' tab
CHN_2012_CHARLS	China	2012	China Health and Retirement Longitudinal Study (CHARLS), wave 2 pilot survey	Subnational	Both	45+	45+	856	934	included in 'Survey data' tab
CHN_2015_CHARLS	China	2015	China Health and Retirement Longitudinal Study (CHARLS), wave 4 survey	National	Both	45+	45+	7032	7719	included in 'Survey data' tab
CHN_2015_CHNS	China	2015	China Health and Nutrition Study	National	Both	5+	5+	5419	5765	included in 'Survey data' tab
CHN_1987_3156001	China	1987	INCLEN	Community	Urban	35-65		989		contact
CHN_1988_3156002	China	1986-1989	Ewang et al., Zhonghua Liu Xing Bing Xue Za Zhi 26:394-9, 2005	Community	Both	45-64		18244		contact
CHN_1988_SinoMONICA-HB	China	1988	Sino-MONICA Hebei	Community	Both	25-64		800		contact
CHN_1988_SinoMONICA-HLJ	China	1988	Sino-MONICA Heilongjiang	Community	Urban	25-64	25-64	800	800	contact
CHN_1988_SinoMONICA-HN	China	1988	Sino-MONICA Henan	Community	Urban	25-64	25-64	345	427	contact
CHN_1988_SinoMONICA-NM	China	1988	Sino-MONICA Neimenggu	Community	Urban	25-64	25-64	396	400	contact
CHN_1988_SinoMONICA-SC	China	1988	Sino-MONICA Sichuan	Community	Both	25-64	25-64	312	334	contact
CHN_1988_SinoMONICA-SD	China	1988	Sino-MONICA Shandong	Community	Urban	25-64	25-64	211	225	contact
CHN_1988_SinoMONICA-SH	China	1986-1989	Sino-MONICA Shanghai	Community	Rural	25-64	25-64	675	753	contact
CHN_1989_3156021	China	1989	The Tianjin Project	Community	Urban	15-64	15-64	3894	3971	contact
CHN_1989_3156139	China	1988-1989	Wang et al., Zhonghua Liu Xing Bing Xue Za Zhi 24:272-75, 2003	Community	Both	25-64	25-64	873	731	contact
CHN_1989_APCSC-EastBeijing2	China	1988-1990	East Beijing Study 2	Community	Urban	20-84	20-84	135	148	contact
CHN_1989_SinoMONICA-BJ	China	1988-1989	Sino-MONICA Beijing	Community	Both	25-64	25-64	701	862	contact
CHN_1989_SinoMONICA-FJ	China	1989	Sino-MONICA Fujian	Community	Urban	25-64	25-64	179	191	contact
CHN_1989_SinoMONICA-JL	China	1988-1989	Sino-MONICA Jilin	Community	Urban	25-64	25-64	380	400	contact
CHN_1989_SinoMONICA-JS	China	1989	Sino-MONICA Jiangsu	Community	Rural	25-64	25-64	398	399	contact
CHN_1989_SinoMONICA-JX	China	1988-1989	Sino-MONICA Jiangxi	Community	Urban	25-64	25-64	379	386	contact
CHN_1989_SinoMONICA-LN	China	1988-1989	Sino-MONICA Liaoning	Community	Both	25-64	25-64	728	734	contact
CHN_1991_CHEFS	China	1991	China National Hypertension Survey Epidemiology Follow-up Study	National	Both	40+	40+	75696	79040	contact
CHN_1991_CPS	China	1990-1991	China Prospective Study	National	Both	40-79		230676		contact
CHN_1991_SinoMONICA-SH	China	1991	Sino-MONICA Shanghai	Community	Rural	30-64	30-64	564	624	contact
CHN_1992_APCSC-Anzhen02	China	1992-1993	Anzhen 02 Cohort Study	Community	Urban	34-65	34-65	2032	2120	contact
CHN_1992_APCSC-Fangshan	China	1991-1992	Fangshan Cohort Study	Community	Urban	34-86	34-86	871	1736	contact
CHN_1992_APCSC-Huashan	China	1992	Huashan Study	Community	Urban	35-75	35-75	892	965	contact
CHN_1992_CNNS	China	1992	China National Nutrition Survey	National	Both	5+	5+	33714	36271	contact
CHN_1992_SinoMONICA-SC	China	1992	Sino-MONICA Sichuan	Community	Both	25-64	25-64	608	526	contact
CHN_1993_3156139	China	1993	Wang et al., Zhonghua Liu Xing Bing Xue Za Zhi 24:272-75, 2003	Community	Both	25-64	25-64	822	617	contact
CHN_1993_SinoMONICA-AH	China	1993	Sino-MONICA Anhui	Community	Urban	25-64	25-64	193	195	contact
CHN_1993_SinoMONICA-BJ	China	1993	Sino-MONICA Beijing	Community	Both	25-64	25-64	613	816	contact
CHN_1993_SinoMONICA-JS	China	1993	Sino-MONICA Jiangsu	Community	Urban	25-64	25-64	462	365	contact
CHN_1993_SinoMONICA-LN	China	1993	Sino-MONICA Liaoning	Community	Both	25-64	25-64	493	500	contact
CHN_1996_3156139	China	1996	Wang et al., Zhonghua Liu Xing Bing Xue Za Zhi 24:272-75, 2003	Community	Both	25-64	25-64	735	721	contact
CHN_1996_3156164	China	1996	The Tianjin Project	Community	Urban	15-64	15-64	722	717	contact
CHN_1998_3156103	China	1998	Shanghai Diabetes Study	Community	Urban	25+	25+	1264	1768	contact
CHN_1998_SWHS	China	1996-2000	Shanghai Women's Health Study	Community	Urban		40-70		74915	contact
CHN_1999_3156065	China	1999	Chen et al., Zhonghua Yi Xue Za Zhi 85(40):2830-4, 2005	Subnational	Both	35-85	35-85	13549	10315	contact
CHN_1999_3156139	China	1999	Wang et al., Zhonghua Liu Xing Bing Xue Za Zhi 24:272-75, 2003	Community	Both	25-64	25-64	818	685	contact
CHN_1999_3156162	China	1998-2000	Jia et al., Obes Rev 3:157-65, 2002	Community	Urban	20+	20+	1106	1670	contact
CHN_2000_3156048	China	1996-2003	Wu et al., Osteoporos Int 15:751-59, 2004	Community	Urban		18+		3418	contact
CHN_2000_3156092	China	1999-2000	Xu et al., Public Health Nutr 8:47-51, 2005	Community	Both	35+	35+	18194	18902	contact
CHN_2001_3156103	China	2001	Shanghai Diabetes Study	Community	Urban	25+	25+	1264	1768	contact
CHN_2001_InterASIA	China	2000-2001	The International Collaborative Study of Cardiovascular Disease in Asia	National	Both	35-74	35-74	7512	8006	contact
CHN_2002_3156045	China	2002	Ma et al., Zhonghua Liu Xing Bing Xue Za Zhi 25:1035-8, 2004	Subnational	Both	18+	18+	7352	7352	contact
CHN_2002_CNNHS	China	2002	China National Nutrition and Health Survey	National	Both	5-101	5-101	84194	92687	contact
CHN_2003_3156055	China	2002-2003	Fan et al., J Gastroenterol Hepatol 20:1825-32, 2005	Community	Urban	15+	15-74	5502	7767	contact
CHN_2004_3156123	China	2004	Tian et al., Prev Med 48:59-63, 2009	Community	Rural	15+	15+	1022669	1163313	contact
CHN_2004_SMHS	China	2002-2006	Shanghai Men's Health Study	Community	Urban	40-74		61445		contact
CHN_2005_3156108	China	2004-2006	Pang et al., Intern Med 47:893-97, 2008	Community	Rural	35+	35+	22963	22962	contact
CHN_2005_3156156	China	2005	Ye et al., J Am Coll Cardiol 49:1798-805, 2007	Community	Urban	50-70	50-70	743	906	contact
CHN_2005_SWHS	China	2004-2006	Shanghai Women's Health Study	Community	Urban		45-80		64545	contact
CHN_2006_3156158	China	2005-2006	Zhou et al., World J Gastroenterol 13:6419-24, 2007	Community	Urban	18-79	18-79	1101	2063	contact
CHN_2006_BES	China	2006	Beijing Eye Study	Community	Both	45+	45+	1394	1820	contact
CHN_2006_CKBrural	China	2004-2008	China Kadoorie Biobank baseline survey	Subnational	Rural	35-74	35-74	115792	162848	contact
CHN_2006_CKBurban	China	2004-2008	China Kadoorie Biobank baseline survey	Subnational	Urban	35-74	35-74	89219	132860	contact
CHN_2006_SMHS	China	2004-2008	Shanghai Men's Health Study	Community	Urban	41-80		54800		contact
CHN_2007_HES	China	2006-2007	Handan Eye Study	Community	Rural	30+	30+	2995	3456	contact
CHN_2008_CLHLS	China	2008-2009	Chinese Longitudinal Healthy Longevity Survey	National	Both	65+	65+	6827	8976	contact
CHN_2008_CNDMDS	China	2007-2008	China National Diabetes & Metabolic Disorders Study	National	Both	20+	20+	18419	27820	contact
CHN_2009_Fangshan	China	2008-2010	Fangshan Family-based Ischemic Stroke Study in China (FISSIC) program	Community	Rural	40+	40+	19478	36449	contact
CHN_2009_SWHS	China	2007-2011	Shanghai Women's Health Study	Community	Urban		47-83		52116	contact
CHN_2010_CKD	China	2009-2010	China National Survey of Chronic Kidney Disease	National	Both	18+	18+	20003	26854	contact
CHN_2010_CNCDS	China	2010	China Noncommunicable Disease Surveillance	National	Both	18+	18+	45066	53452	contact
CHN_2010_SMHS	China	2008-2011	Shanghai Men's Health Study	Community	Urban	43-84		51948		contact
CHN_2011_BES	China	2011	Beijing Eye Study	Community	Both	50+	50+	1467	1895	contact
CHN_2012_CLHLS	China	2011-2012	Chinese Longitudinal Healthy Longevity Survey	National	Both	65+	65+	4035	4620	contact
CHN_2012_NFPHEP	China	2010-2014	National Free Preconception Health Examination Project	National	Rural	20-64		16166534		contact
CHN_2013_CHARLS	China	2013	China Health and Retirement Longitudinal Study (CHARLS), wave 2 survey	National	Both	45+	45+	5898	6582	contact
CHN_2013_ECS	China	2013	Gobi Desert Children Eye Study	Community	Urban	6-21	6-21	800	761	contact
CHN_2013_KS	China	2012-2013	The Kailuan Study	Community	Urban	18+	18+	80921	21385	contact
CHN_2014_CLHLS	China	2014	Chinese Longitudinal Healthy Longevity Survey	National	Both	65+	65+	2978	3172	contact
CHN_2014_SMHS	China	2012-2015	Shanghai Men's Health Study	Community	Urban	47-87		40921		contact
CHN_2014_SWHS	China	2012-2015	Shanghai Women's Health Study	Community	Urban		52-88		49592	contact
CHN_2015_KS	China	2014-2015	The Kailuan Study	Community	Urban	18+	18+	73161	18280	contact
HKG_1985_APCSC-Shatin	China (Hong Kong SAR)	1985-1986	Shatin New Town Study	Community	Urban	70+	70+	276	669	contact
HKG_1991_APCSC-HKOldOld	China (Hong Kong SAR)	1991	The Hong Kong study on health, health risk and quality of life in the Chinese elderly cohort	Community	Both	70+	70+	943	944	contact
HKG_1996_CRFPS	China (Hong Kong SAR)	1995-1996	Hong Kong Cardiovascular Risk Factor Prevalence Study 1995-1996	National	Both	25-74	25-74	1412	1478	contact
COL_1986_INTERSALT	Colombia	1986	INTERSALT	Community	Rural	20-59	20-59	96	95	included in 'Survey data' tab
COL_1995_DHS	Colombia	1995	DHS	National	Both		20-49		3068	included in 'Survey data' tab
COL_2000_DHS	Colombia	2000	DHS	National	Both		20-49		2929	included in 'Survey data' tab
COL_2005_DHS	Colombia	2005	DHS	National	Both	5-64	5-64	43436	57778	included in 'Survey data' tab
COL_2010_DHS	Colombia	2010	DHS	National	Both	5-64	5-64	65086	76792	included in 'Survey data' tab
COL_2001_12170038	Colombia	2001	CINDI/CARMEN - Bucaramaga	Community	Urban	15-74	15-74	627	1218	contact
COL_2002_12170040	Colombia	2002	CINDI/CARMEN - Bogota	Community	Urban	15-74	15-74	322	570	contact
COL_2002_santafe	Colombia	2002	Factores de riesgo cardiovascular en la localidad de Santa Fe de la ciudad de Bogotá. Resultados obtenidos en el área demostrativa Carmen	Community	Urban	15-69	15-69	394	684	contact
COL_2002_tunjuelito	Colombia	2002	Factores de riesgo cardiovascular en la localidad de Tunjuelito de la ciudad de Bogotá. Resultados obtenidos en el área demostrativa Carmen	Community	Urban	15-29	15-29	208	312	contact
COL_2005_CARMELA	Colombia	2004-2005	CArdiovascular Risk factors Multiple Evaluation in Latin America	Community	Urban	25-64	25-64	738	812	contact
COL_2005_ENSIN	Colombia	2005	Encuesta Nacional de Situacion Nutricional	National	Both	5-12	5-49	2644	6088	contact
COL_2007_ENS	Colombia	2007	Encuesta Nacional de Salud	National	Both	18-69	18-69	5462	7686	contact
COL_2010_STEPS	Colombia	2010	STEPS	Subnational	Both	15-64	15-64	1034	1356	contact
COL_2015_ENSIN	Colombia	2015	Encuesta Nacional de Situacion Nutricional	National	Both	5-64	5-64	4874	5742	contact
COL_2015_STEPS	Colombia	2015	STEPS	Subnational	Both	15-64	15-64	979	1181	contact
COM_1996_DHS	Comoros	1996	DHS	National	Both		20-49		744	included in 'Survey data' tab
COM_2011_STEPS	Comoros	2011	STEPS	National	Both	25-64	25-64	1541	3505	included in 'Survey data' tab
COM_2012_DHS	Comoros	2012	DHS	National	Both		15-49		4845	included in 'Survey data' tab
COG_2004_STEPS	Congo	2004	STEPS	Community	Urban	25-64	25-64	1013	956	included in 'Survey data' tab
COG_2005_DHS	Congo	2005	DHS	National	Both		15-49		6266	included in 'Survey data' tab
COG_2012_DHS	Congo	2011-2012	DHS	National	Both		15-49		5060	included in 'Survey data' tab
COG_1986_Brazzaville	Congo	1986	Enquête Brazzaville 1986	Community	Urban	5-50	5-50	129	1079	contact
COG_1987_18178001	Congo	1987	Maire et al., Rev Epidemiol Sante Publique 40:252-58, 1992	Community	Rural		16-45		750	contact
COG_1987_ENC	Congo	1987	Enquête Nationale Congo 1987	National	Rural		13-49		1356	contact
COG_1991_Brazzaville	Congo	1991	Enquête Brazzaville 1991	Community	Urban	5-90	5-90	2393	3149	contact
COG_1996_Brazzaville	Congo	1996	Enquête Brazzaville 1996	Community	Urban	5-90	5-90	2496	3073	contact
COK_2003_STEPS	Cook Islands	2003	STEPS	National	Both	25-64	25-64	925	958	included in 'Survey data' tab
COK_2014_STEPS	Cook Islands	2013-2015	STEPS	National	Both	18-64	18-64	456	469	included in 'Survey data' tab
CRI_2005_CRELES	Costa Rica	2004-2006	Costa Rican Longevity and Healthy Aging Study Pre-1945 Cohort Wave 1	National	Both	60+	60+	1163	1346	included in 'Survey data' tab
CRI_2007_CRELES	Costa Rica	2006-2008	Costa Rican Longevity and Healthy Aging Study Pre-1945 Cohort Wave 2	National	Both	62+	62+	944	1102	included in 'Survey data' tab
CRI_2009_CRELES	Costa Rica	2009-2010	Costa Rican Longevity and Healthy Aging Study Pre-1945 Cohort Wave 3	National	Both	64+	64+	737	887	included in 'Survey data' tab
CRI_2011_CRELES	Costa Rica	2010-2011	Costa Rican Longevity and Healthy Aging Study 1945-1955 Cohort Wave 1	National	Both	54-66	54-66	1058	1676	included in 'Survey data' tab
CRI_2013_CRELES	Costa Rica	2012-2014	Costa Rican Longevity and Healthy Aging Study 1945-1955 Cohort Wave 2	National	Both	56-68	56-68	867	1470	included in 'Survey data' tab
CRI_2004_CAMDI	Costa Rica	2004	CAMDI	Community	Urban	20+	20+	304	624	contact
CRI_2009_ENN	Costa Rica	2008-2009	Encuesta Nacional de Nutricion 2008-2009	National	Both		45-64		661	contact
CRI_2010_CRFS	Costa Rica	2010	Costa Rican National Cardiovascular Risk Factors Survey, 2010	National	Both	20+	20+	778	1958	contact
CRI_2014_CRFS	Costa Rica	2014	Costa Rican National Cardiovascular Risk Factors Survey, 2014	National	Both	20+	20+	1003	2196	contact
CIV_1994_DHS	Cote d'Ivoire	1994	DHS	National	Both		20-49		2682	included in 'Survey data' tab
CIV_1999_DHS	Cote d'Ivoire	1998-1999	DHS	National	Both		15-49		2740	included in 'Survey data' tab
CIV_2005_STEPS_rural	Cote d'Ivoire	2005	STEPS	Subnational	Rural	15-64	15-64	894	1022	included in 'Survey data' tab
CIV_2005_STEPS_urban	Cote d'Ivoire	2005	STEPS	Subnational	Urban	15-64	15-64	1071	1437	included in 'Survey data' tab
CIV_2012_DHS	Cote d'Ivoire	2011-2012	DHS	National	Both		15-49		4601	included in 'Survey data' tab
HRV_1998_HCSC	Croatia	1997-1999	Budak A et al., Lijec Vjesn 125(1-2):32-5, 2003	National	Both	25-100	25-100	1763	2684	contact
HRV_2004_EHUH	Croatia	2002-2007	Epidemiology of arterial hypertension in Croatia (EH-UH)	National	Both	18+	18+	505	705	contact
HRV_2005_ENAH	Croatia	2005	Endemic Nephropathy and Arterial hypertension (ENAH)	Subnational	Rural	18+	18+	264	367	contact
HRV_2008_ENAH	Croatia	2008	Endemic Nephropathy and Arterial hypertension (ENAH)	Subnational	Rural	18+	18+	331	527	contact
HRV_2010_ENAH	Croatia	2010	Endemic Nephropathy and Arterial hypertension (ENAH)	Subnational	Rural	18+	18+	252	393	contact
HRV_2015_ENAH	Croatia	2015	Endemic Nephropathy and Arterial hypertension (ENAH) Follow-up Study	Subnational	Rural	18+	18+	224	460	contact
CUB_2000_SABE	Cuba	1999-2000	The Survey on Health, Well-Being, and Aging in Latin America and the Caribbean (SABE)	Community	Urban	60+	60+	630	1044	included in 'Survey data' tab
CUB_2002_NSRF	Cuba	2001-2002	National Survey of Risk Factors	National	Both	20-60	20-60	11425.5	11425.5	contact
CUB_2010_NRFS	Cuba	2010	National Risk Factor Survey	National	Both	15+	15+	3344	3868	contact
CUB_2011_Cienfuegos	Cuba	2011	Non communicable disease risk factor in Cienfuegos	Community	Urban	15-80	15-80	617	880	contact
CYP_2000_CINDI	Cyprus	1999-2000	Countrywide Integrated Noncommunicable Diseases Intervention Programme Cyprus	National	Both	25-65	25-65	457	546	contact
CZE_1985_MONICA	Czech Republic	1985	Czech-MONICA	National	Both	25-64	25-64	1243	1303	included in 'Survey data' tab
CZE_1988_MONICA	Czech Republic	1988	Czech-MONICA	National	Both	25-64	25-64	1357	1408	included in 'Survey data' tab
CZE_1992_MONICA	Czech Republic	1992	Czech-MONICA	National	Both	25-64	25-64	1131	1207	included in 'Survey data' tab
CZE_1998_postMONICA	Czech Republic	1997-1998	Czech post-MONICA	National	Both	25-64	25-64	1527	1665	contact
CZE_2000_HELEN	Czech Republic	1998-2002	Health, Lifestyle and the Environment	National	Urban	45-54	45-54	1539	2044	contact
CZE_2001_postMONICA	Czech Republic	2000-2001	Czech post-MONICA	National	Both	25-64	25-64	1628	1690	contact
CZE_2004_HAPIEE	Czech Republic	2002-2005	Health, Alcohol and Psychosocial Factors In Eastern Europe	Subnational	Urban	44-72	44-72	3321	3935	contact
CZE_2005_HELEN	Czech Republic	2004-2005	Health, Lifestyle and the Environment	National	Urban	45-54	45-54	775	1072	contact
CZE_2008_postMONICA	Czech Republic	2006-2009	Czech post-MONICA	National	Both	25-64	25-64	1717	1861	contact
CZE_2009_HELEN	Czech Republic	2009	Health, Lifestyle and the Environment	National	Urban	45-54	45-54	307	447	contact
CZE_2015_EHES	Czech Republic	2014-2015	European Heath Examination Survey	National	Both	25-64	25-64	480	699	contact
CZE_2017_MONICA	Czech Republic	2015-2018	MONICA	National	Both	25-65	25-65	1247	1371	contact
DNK_1985_INTERSALT	Denmark	1985	INTERSALT	Community	Urban	20-59	20-59	99	100	included in 'Survey data' tab
DNK_1986_MONICA-GLOa	Denmark	1986-1987	MONICA, Glostrup	Community	Urban	29-61	29-61	746	753	included in 'Survey data' tab
DNK_1991_MONICA-GLOa	Denmark	1991-1992	MONICA, Glostrup	Community	Urban	29-61	29-61	808	816	included in 'Survey data' tab
DNK_1985_2336544	Denmark	1984-1985	The Epidemiology of Gallstones in a 70 Year-Old Danish Population	Community	Both	70	70	202	172	contact
DNK_1987_10208134	Denmark	1987	Nilsson et al., J Intern Med 237:479-86, 1995	Community	Urban	51		439		contact
DNK_1988_sMONICA	Denmark	1987-1988	MONICA I, 5-years re-examination (semi-MONICA)	Community	Urban	35-66	35-66	1524	1463	contact
DNK_1993_CCHS	Denmark	1991-1994	Copenhagen City Heart Study	Subnational	Urban	20+	20+	4274	5416	contact
DNK_1994_sMONICA	Denmark	1993-1994	MONICA 1 - 10 years examination (semi-MONICA)	Community	Urban	41-72	41-72	1333	1323	contact
DNK_1995_EPICaarhus	Denmark	1993-1997	EPIC Aarhus	Community	Urban	50-65	50-65	8430	8717	contact
DNK_1995_EPICcopenhagen	Denmark	1993-1997	EPIC Copenhagen	Community	Urban	50-65	50-65	18729	21133	contact
DNK_1997_10208106	Denmark	1996-1997	Drivsholm et al., Diabet Med 18:126-32, 2001	Subnational	Urban	60	60	325	370	contact
DNK_2002_CCHS	Denmark	2001-2003	Copenhagen City Heart Study	Subnational	Urban	20+	20+	2567	3446	contact
DNK_2003_10208119	Denmark	2002-2003	Odense Androgen Study	Community	Urban	20-29		783		contact
DNK_2004_CGPS1	Denmark	2003-2004	Copenhagen General Population Study 1	Subnational	Urban	20+	20+	4828	5397	contact
DNK_2005_CGPS1	Denmark	2005	Copenhagen General Population Study 1	Subnational	Urban	20+	20+	5171	6023	contact
DNK_2006_CGPS1	Denmark	2006	Copenhagen General Population Study 1	Subnational	Urban	20+	20+	5055	4861	contact
DNK_2006_CON	Denmark	2006	Danish Conscript Register	National	Both	17-26		25063		contact
DNK_2007_CGPS1	Denmark	2007	Copenhagen General Population Study 1	Subnational	Urban	20+	20+	4027	6913	contact
DNK_2007_CON	Denmark	2007	Danish Conscript Register	National	Both	17-26		27194		contact
DNK_2007_Health2006	Denmark	2006-2008	The Health2006 Cohort	Subnational	Urban	18-71	18-71	1553	1916	contact
DNK_2008_CGPS1	Denmark	2008	Copenhagen General Population Study 1	Subnational	Urban	20+	20+	4735	6467	contact
DNK_2008_CON	Denmark	2008	Danish Conscript Register	National	Both	17-26		24538		contact
DNK_2008_DANHES	Denmark	2007-2008	The Danish Health Examination Survey 2007-2008	National	Both	18+	18+	7349	10651	contact
DNK_2009_CGPS1	Denmark	2009	Copenhagen General Population Study 1	Subnational	Urban	20+	20+	4214	5244	contact
DNK_2009_CON	Denmark	2009	Danish Conscript Register	National	Both	17-26		27093		contact
DNK_2010_CGPS1	Denmark	2010	Copenhagen General Population Study 1	Subnational	Urban	20+	20+	3967	4891	contact
DNK_2010_CON	Denmark	2010	Danish Conscript Register	National	Both	17-26		30814		contact
DNK_2010_EYHS	Denmark	2009-2010	The European Youth Heart Study	Community	Both	14-28	14-28	481	553	contact
DNK_2011_CGPS1	Denmark	2011	Copenhagen General Population Study 1	Subnational	Urban	20+	20+	4935	5824	contact
DNK_2011_CON	Denmark	2011	Danish Conscript Register	National	Both	17-26		30719		contact
DNK_2012_CGPS1	Denmark	2012	Copenhagen General Population Study 1	Subnational	Urban	20+	20+	4516	5423	contact
DNK_2012_CON	Denmark	2012	Danish Conscript Register	National	Both	17-26		29651		contact
DNK_2012_Health2006	Denmark	2011-2012	The Health2006 cohort - 5-year follow-up	Subnational	Urban	24-76	24-76	1057	1249	contact
DNK_2013_CGPS1	Denmark	2013	Copenhagen General Population Study 1	Subnational	Urban	20+	20+	4001	4703	contact
DNK_2013_CON	Denmark	2013	Danish Conscript Register	National	Both	17-26		30565		contact
DNK_2014_CGPS2	Denmark	2014	Copenhagen General Population Study 2	Subnational	Urban	20+	20+	1391	1782	contact
DNK_2014_CON	Denmark	2014	Danish Conscript Register	National	Both	17-26		32397		contact
DNK_2014_DanFunD	Denmark	2012-2015	The Danish study of Functional Disorders (DanFunD)	Subnational	Urban	18-72	18-72	3451	4034	contact
DNK_2015_CGPS1	Denmark	2014-2015	Copenhagen General Population Study 1	Subnational	Urban	20+	20+	2245	2837	contact
DNK_2015_CGPS2	Denmark	2015	Copenhagen General Population Study 2	Subnational	Urban	20+	20+	4103	5107	contact
DNK_2015_CON	Denmark	2015	Danish Conscript Register	National	Both	17-26		28907		contact
DNK_2016_CGPS2	Denmark	2016	Copenhagen General Population Study 2	Subnational	Urban	20+	20+	4493	5495	contact
DNK_2016_CON	Denmark	2016	Conscript	National	Both	17-29		29057		contact
DNK_2017_CGPS2	Denmark	2017	Copenhagen General Population Study 2	Subnational	Urban	20+	20+	3182	4395	contact
DNK_2017_CON	Denmark	2017	Conscript	National	Both	17-29		31057		contact
DNK_2018_CON	Denmark	2018	Conscript	National	Both	17-29		27597		contact
DNK_2019_CON	Denmark	2019	Conscript	National	Both	17-29		25412		contact
DMA_2007_STEPS	Dominica	2007	STEPS	National	Both	15-64	15-64	459	568	included in 'Survey data' tab
DOM_1991_DHS	Dominican Republic	1991	DHS	National	Both		20-49		1965	included in 'Survey data' tab
DOM_1996_DHS	Dominican Republic	1996	DHS	National	Both		15-49		7441	included in 'Survey data' tab
DOM_2013_DHS	Dominican Republic	2013	DHS	National	Both	15-59	15-49	10433	8960	included in 'Survey data' tab
DOM_1993_NRDVHS	Dominican Republic	1993	Aono et al., J Epidemiol 7(4):238-43, 1997	National	Both	20-70	20-70	767	1149	contact
DOM_1997_EFRICARD	Dominican Republic	1996-1998	Estudio factores de riesgo cardiovascular y sindrome metabolico en la Republica Dominicana I (EFRICARD I)	National	Both	18-75	18-75	2087	4095	contact
DOM_2011_EFRICARDII	Dominican Republic	2010-2012	Estudio factores de riesgo cardiovascular y sindrome metabolico en la Republica Dominicana II (EFRICARD II)	National	Both	18-75	18-75	1641	3254	contact
COD_2005_STEPS	DR Congo	2005	STEPS	Subnational	Urban	15+	15+	761	1152	included in 'Survey data' tab
COD_2007_DHS	DR Congo	2007	DHS	National	Both		15-49		4137	included in 'Survey data' tab
COD_2014_DHS	DR Congo	2013-2014	DHS	National	Both		15-49		8163	included in 'Survey data' tab
COD_2001_MICS2	DR Congo	2001	Multiple Indicator Cluster Survey Round 2	National	Both		15-49		5520	contact
ECU_2004_RHS	Ecuador	2004	Encuesta Demografica y de Salud Materno e Infantil/Reproductive Health Survey	National	Both		15-49		3850	included in 'Survey data' tab
ECU_2010_SABE	Ecuador	2009-2010	National Survey of Health, Wellbeing, and Aging	National	Both	60+	60+	2341	2592	included in 'Survey data' tab
ECU_2005_CARMELA	Ecuador	2004-2005	CArdiovascular Risk factors Multiple Evaluation in Latin America	Community	Urban	25-64	25-64	813	814	contact
ECU_2012_ENSANUT	Ecuador	2011-2013	Encuesta Nacional de Salud y Nutrición (ENSANUT)	National	Both	5-59	5-59	22919	25767	contact
ECU_2018_ENSANUT	Ecuador	2018	Encuesta Nacional de Salud y Nutrición (ENSANUT)	National	Both	5+	5+	63176	65597	contact
EGY_1992_DHS	Egypt	1992	DHS	National	Both		20-49		4654	included in 'Survey data' tab
EGY_1995_DHS	Egypt	1995	DHS	National	Both		20-49		6499	included in 'Survey data' tab
EGY_2000_DHS	Egypt	2000	DHS	National	Both		20-49		13602	included in 'Survey data' tab
EGY_2003_DHS	Egypt	2003	DHS	National	Both		20-49		7930	included in 'Survey data' tab
EGY_2005_DHS	Egypt	2005	DHS	National	Both		20-49		16864	included in 'Survey data' tab
EGY_2005_STEPS	Egypt	2005	STEPS	National	Both	15-65	15-65	4757	4428	included in 'Survey data' tab
EGY_2008_DHS	Egypt	2008	DHS	National	Both	10-59	20-49	14261	15242	included in 'Survey data' tab
EGY_2011_STEPS	Egypt	2011	STEPS	National	Both	15-65	15-65	1761	2977	included in 'Survey data' tab
EGY_2014_DHS	Egypt	2014	DHS	National	Both		20-49		18891	included in 'Survey data' tab
EGY_2015_DHS	Egypt	2015	DHS	National	Both	15-59	15-59	7235	8471	included in 'Survey data' tab
EGY_2017_STEPS	Egypt	2017	STEPS	National	Both	15-69	15-69	2273	3692	included in 'Survey data' tab
EGY_2002_NS	Egypt	2002	National Survey of Smoking, Obesity, Blood Pressure and Blood Glucose	National	Both	5+	5+	4397	5161	contact
EGY_2004_citMarzouk	Egypt	2003-2004	Marzouk et al., Gut 56(8):1105-10, 2007	Community	Rural	25+	25+	322	456	contact
EGY_2008_citMostafa	Egypt	2007-2009	Mostafa et al., Gut 59(8):1135-40, 2010	Community	Rural	35+	35+	642	843	contact
SLV_2003_FESAL	El Salvador	2002-2003	Ecuesta Nacional de Salud Familiar	National	Both		15-49		3885	included in 'Survey data' tab
SLV_2008_FESAL	El Salvador	2008	Ecuesta Nacional de Salud Familiar	National	Both		15-49		6808	included in 'Survey data' tab
SLV_2004_CAMDI	El Salvador	2004	CAMDI	Community	Urban	20+	20+	396	811	contact
SLV_2015_ENECA	El Salvador	2014-2015	Encuesta Nacional de Enfermedades Crónicas (ENECA-ELS)	National	Both	20+	20+	1684	2945	contact
GNQ_2011_DHS	Equatorial Guinea	2011	DHS	National	Both		15-49		1074	contact
ERI_2004_STEPS	Eritrea	2004	STEPS	National	Both	15-64	15-64	1113	1089	included in 'Survey data' tab
ERI_2010_STEPS	Eritrea	2010	STEPS	National	Both	25-74	25-74	1712	4285	included in 'Survey data' tab
ERI_1995_DHS	Eritrea	1995	DHS	National	Both		15-49		1621	contact
ERI_2002_DHS	Eritrea	2002	DHS	National	Both		15-49		3223	contact
EST_1985_9233013	Estonia	1984-1986	Abina et al., Blood Press 12:111-21, 2003	Community	Urban	20-54	30-54	2477	851	contact
EST_1993_9233014	Estonia	1992-1994	Abina et al., Blood Press 12:111-21, 2003	Community	Urban	20-54	20-54	921	678	contact
EST_1997_citPomerleau	Estonia	1997	Pomerleau et al., Public Health Nutrition 3:3-10, 2000	National	Both	19-64	19-64	525	629	contact
EST_2000_9233015	Estonia	1999-2001	Abina et al., Blood Press 12:111-21, 2003	Community	Urban	20-54	20-54	635	692	contact
EST_2002_Biobank	Estonia	2002	Estonian Biobank	National	Both	18+	18+	89	217	contact
EST_2003_Biobank	Estonia	2003	Estonian Biobank	National	Both	18+	18+	2695	5688	contact
EST_2003_EMAS	Estonia	2003	The European Male Ageing Study	Community	Both	40+		416		contact
EST_2004_Biobank	Estonia	2004	Estonian Biobank	National	Both	18+	18+	527	947	contact
EST_2007_Biobank	Estonia	2007	Estonian Biobank	National	Both	18+	18+	1000	2187	contact
EST_2008_Biobank	Estonia	2008	Estonian Biobank	National	Both	18+	18+	5147	10990	contact
EST_2008_EMAS	Estonia	2008	The European Male Ageing Study	Community	Both	40+		305		contact
EST_2009_Biobank	Estonia	2009	Estonian Biobank	National	Both	18+	18+	3963	6493	contact
EST_2010_Biobank	Estonia	2010	Estonian Biobank	National	Both	18+	18+	4052	7045	contact
EST_2011_Biobank	Estonia	2011	Estonian Biobank	National	Both	18+	18+	111	176	contact
EST_2012_Biobank	Estonia	2012	Estonian Biobank	National	Both	18+	18+	85	130	contact
EST_2013_Biobank	Estonia	2013	Estonian Biobank	National	Both	18+	18+	106	143	contact
EST_2014_RTU	Estonia	2013-2015	National Dietary Survey (RTU) 2014	National	Both	5-74	5-74	1260	2202	contact
ETH_2000_DHS	Ethiopia	2000	DHS	National	Both		15-49		13912	included in 'Survey data' tab
ETH_2005_DHS	Ethiopia	2005	DHS	National	Both		15-49		6133	included in 'Survey data' tab
ETH_2006_STEPS	Ethiopia	2006	STEPS	Subnational	Urban	25-64	25-64	1642	2295	included in 'Survey data' tab
ETH_2011_DHS	Ethiopia	2011	DHS	National	Both	15-59	15-49	14329	15111	included in 'Survey data' tab
ETH_2016_DHS	Ethiopia	2016	DHS	National	Both	15-59	15-49	12380	14104	included in 'Survey data' tab
FJI_2002_STEPS	Fiji	2002	STEPS	National	Both	15-64	15-64	2684	3820	included in 'Survey data' tab
FJI_2011_STEPS	Fiji	2011	STEPS	National	Both	25-64	25-64	1123	1417	included in 'Survey data' tab
FJI_2008_OPIC-MYP	Fiji	2007-2008	Pacific Obesity Prevention in Communities – Healthy Youth Health Communities Study	Subnational	Urban	13-22	13-22	1492	1832	contact
FJI_2009_EHS	Fiji	2009	Fiji Eye Health Survey 2009	National	Both	40+	40+	582	776	contact
FIN_1985_INTERSALT-Joensuu	Finland	1985-1986	INTERSALT, Joensuu	Community	Urban	20-59	20-59	100	100	included in 'Survey data' tab
FIN_1985_INTERSALT-Turku	Finland	1985	INTERSALT, Turku	Community	Urban	20-59	20-59	100	100	included in 'Survey data' tab
FIN_1987_MONICA-FIN	Finland	1987	MONICA, North Karelia/Kuopio/Turku/Loimaa	Subnational	Both	25-64	25-64	2896	3151	included in 'Survey data' tab
FIN_1986_YFS_rural	Finland	1986	Young Finns Study 1986	National	Rural	9-24	9-24	594	631	contact
FIN_1986_YFS_urban	Finland	1986	Young Finns Study 1986	National	Urban	9-24	9-24	587	666	contact
FIN_1987_KIHD	Finland	1984-1989	Kuopio Ischaemic Heart Disease Risk Factor Study	Subnational	Both	42-61		2670		contact
FIN_1989_FINE	Finland	1989	Finnish cohort of the FINE study	Community	Rural	70-89		446		contact
FIN_1991_Oulu35	Finland	1990-1992	Oulu 35 Study	Community	Urban	56-57	56-57	231	326	contact
FIN_1992_FINRISK	Finland	1992	The National FINRISK Study	Subnational	Both	25-64	25-64	2849	3201	contact
FIN_1992_KIHD	Finland	1991-1993	Kuopio Ischaemic Heart Disease Risk Factor Study	Subnational	Both	46-64		1037		contact
FIN_1994_FINE	Finland	1994	Finnish cohort of the FINE study	Community	Rural	75-94		266		contact
FIN_1997_FINRISK	Finland	1997	The National FINRISK Study	National	Both	25-74	25-74	4128	4131	contact
FIN_1997_NFBC66	Finland	1997	North Finland Birth Cohort 1966	Community	Both	30-31	30-31	2770	149	contact
FIN_1997_Oulu35	Finland	1996-1998	Oulu 35 Study	Community	Urban	60-63	60-63	242	345	contact
FIN_1997_Savi	Finland	1996-1998	Savitaipale Study, Baseline	Community	Rural	40-66	40-66	574	574	contact
FIN_2000_KIHD	Finland	1998-2001	Kuopio Ischaemic Heart Disease Risk Factor Study	Subnational	Both	53-73	53-73	854	920	contact
FIN_2001_HS	Finland	2000-2001	Health 2000 Survey	National	Both	30+	30+	2656	3213	contact
FIN_2001_YFS_rural	Finland	2001	Young Finns Study 2001	National	Rural	24-39	24-39	346	393	contact
FIN_2001_YFS_urban	Finland	2001	Young Finns Study 2001	National	Urban	24-39	24-39	658	769	contact
FIN_2002_FINRISK	Finland	2002	The National FINRISK Study	National	Both	25-74	25-74	3299	3826	contact
FIN_2002_Oulu45	Finland	2001-2003	Oulu 45 Study	Community	Urban	55-58	55-58	426	550	contact
FIN_2003_HBCS	Finland	2001-2004	Helsinki Birth Cohort Study	Community	Urban	56-69	56-69	927	1074	contact
FIN_2005_10246122	Finland	2004-2005	FIN-D2D	Subnational	Both	45-74	45-74	1364	1461	contact
FIN_2005_10246506	Finland	2005	Mantyselka et al., Rheumatology (Oxford) 47(8):1235-38, 2008	Community	Rural	30-65	30-65	230	241	contact
FIN_2007_FINRISK	Finland	2007	The National FINRISK Study	National	Both	25-74	25-74	2934	3323	contact
FIN_2007_KIHD	Finland	2005-2008	Kuopio Ischaemic Heart Disease Risk Factor Study	Subnational	Both	62-82	60-82	1241	634	contact
FIN_2007_Oulu35	Finland	2007	Oulu 35 Study	Community	Urban	71-73	71-73	182	271	contact
FIN_2007_YFS_rural	Finland	2007	Young Finns Study 2007	National	Rural	30-45	30-45	374	431	contact
FIN_2007_YFS_urban	Finland	2007	Young Finns Study 2007	National	Urban	30-45	30-45	602	714	contact
FIN_2008_Athletes	Finland	2008	Control group for Finnish male former elite athletes	National	Both	61+		206		contact
FIN_2008_Savi	Finland	2007-2008	Savitaipale Study, Follow-up	Community	Rural	51-75	51-75	430	483	contact
FIN_2011_YFS_rural	Finland	2011	Young Finns Study 2011	National	Rural	34-49	34-49	364	424	contact
FIN_2011_YFS_urban	Finland	2011	Young Finns Study 2011	National	Urban	34-49	34-49	506	636	contact
FIN_2012_FINRISK	Finland	2012	The National FINRISK Study	National	Both	25-74	25-74	2774	3052	contact
FIN_2012_HS	Finland	2011-2012	Health 2011 Survey	National	Both	30+	30+	2041	2532	contact
FIN_2012_NFBC66	Finland	2012	North Finland Birth Cohort 1966	Community	Both	45-47	45-47	2547	3238	contact
FIN_2017_FinHealth	Finland	2017	The FinHealth Survey	National	Both	18+	18+	2699	3168	contact
FRA_1986_MONICA-STRa	France	1985-1987	MONICA, Strasbourg	Subnational	Both	35-64	35-64	664	713	included in 'Survey data' tab
FRA_1986_MONICA-STRa-Y	France	1985-1987	MONICA, Strasbourg	Community	Both	25-34	25-34	65	78	included in 'Survey data' tab
FRA_1986_MONICA-TOUa	France	1985-1987	MONICA, Toulouse	Subnational	Both	35-64	35-64	675	644	included in 'Survey data' tab
FRA_1987_MONICA-LILa	France	1986-1989	MONICA, Lille	Community	Urban	25-64	25-64	878	732	included in 'Survey data' tab
FRA_1990_MONICA-TOUa	France	1988-1991	MONICA, Toulouse	Subnational	Both	35-64		586		included in 'Survey data' tab
FRA_1995_MONICA-TOUa	France	1994-1996	MONICA, Toulouse	Subnational	Both	35-64	35-64	608	566	included in 'Survey data' tab
FRA_1996_MONICAlille	France	1995-1997	MONICA, Lille	Community	Urban	36-67	36-67	598	590	included in 'Survey data' tab
FRA_1996_MONICAstrasbourg	France	1995-1997	MONICA, Strasbourg	Subnational	Both	35-64	35-64	526	523	included in 'Survey data' tab
FRA_2000_10250490	France	1996-2003	Jaquet et al., Diabetologia 48(5):849-55, 2005	Community	Urban	15-34	15-34	173	164	contact
FRA_2000_3C	France	1999-2001	The Three City Study	Community	Urban	65+	65+	2423	3778	contact
FRA_2005_MONALISAlille	France	2004-2006	National Monitoring of Arterial Risk in Lille (MONA LISA Lille)	Subnational	Urban	35-75	35-75	783	795	contact
FRA_2006_MONALISAbasrhin	France	2005-2007	National Monitoring of Arterial Risk in Bas-Rhin (MONA LISA Bas-Rhin)	Subnational	Both	35-74	35-74	780	787	contact
FRA_2006_MONALISAtoulouse	France	2005-2007	National Monitoring of Arterial Risk in Toulouse (MONA LISA Toulouse)	Subnational	Both	35-74	35-74	829	796	contact
FRA_2007_3C	France	2006-2008	The Three City Study	Community	Urban	72+	72+	768	1217	contact
FRA_2007_ENNS	France	2006-2007	Etude Nationale Nutrition Santé	National	Both	5-74	5-74	1582	2223	contact
FRA_2012_ELISABETdunkerque	France	2011-2013	Enquête LIttorale Souffle Air Biologie EnvironnemenT (ELISABET) Dunkerque	Community	Urban	40-64	40-64	761	812	contact
FRA_2012_ELISABETlille	France	2011-2013	Enquête LIttorale Souffle Air Biologie EnvironnemenT (ELISABET) Lille	Community	Urban	40-64	40-64	758	857	contact
FRA_2013_CONSTANCES	France	2012-2014	Cohorte des consultants des Centres d’examens de santé (CONSTANCES)	National	Both	18-69	18-69	22367	25127	contact
FRA_2015_Esteban	France	2014-2016	Esteban	National	Both	6-74	6-74	1662	1913	contact
FRA_2016_CONSTANCES	France	2015-2017	Cohorte des consultants des Centres d’examens de santé (CONSTANCES)	National	Both	18-69	18-69	43472	48739	contact
FRA_2019_CONSTANCES	France	2018-2019	Cohorte des consultants des Centres d’examens de santé (CONSTANCES)	National	Both	18-69	18-69	19614	22539	contact
PYF_2010_STEPS	French Polynesia	2010	STEPS	National	Both	18-64	18-64	1458	1916	included in 'Survey data' tab
GAB_2000_DHS	Gabon	2000	DHS	National	Both		20-49		2082	included in 'Survey data' tab
GAB_2009_STEPS	Gabon	2009	STEPS	Subnational	Urban	15-64	15-64	1051	1515	included in 'Survey data' tab
GAB_2012_DHS	Gabon	2012	DHS	National	Both		15-49		5066	included in 'Survey data' tab
GMB_2010_STEPS	Gambia	2010	STEPS	National	Both	25-64	25-64	1610	1919	included in 'Survey data' tab
GMB_2013_DHS	Gambia	2013	DHS	National	Both		15-49		4180	included in 'Survey data' tab
GMB_1997_NSBLV	Gambia	1996-1997	National Survey of Blindness and Low Vision	National	Both	16+	16+	1733	2071	contact
GMB_2003_21270015	Gambia	2003	Siervo et al., Eur J Clin Nutr 60(4):455-63, 2006	Community	Urban	14-50	14-50	50	50	contact
GEO_2010_STEPS	Georgia	2010	STEPS	National	Both	18-64	18-64	1842	4460	included in 'Survey data' tab
GEO_2016_STEPS	Georgia	2016	STEPS	National	Both	18-69	18-69	1188	2784	included in 'Survey data' tab
DEU_1985_INTERSALT-Cottbus	Germany	1985-1986	INTERSALT, Cottbus	Community	Urban	20-59	20-59	99	99	included in 'Survey data' tab
DEU_1985_INTERSALT-Heidelberg	Germany	1985-1986	INTERSALT, Heidelberg	Community	Urban	20-59	20-59	97	99	included in 'Survey data' tab
DEU_1985_MONICA-AUG	Germany	1984-1985	MONICA, Augsburg	Community	Both	25-64	25-64	2005	1961	included in 'Survey data' tab
DEU_1985_MONICA-COTa	Germany	1984-1986	MONICA, Cottbus County	Community	Urban	25-64	25-64	657	739	included in 'Survey data' tab
DEU_1985_MONICA-RHNa	Germany	1983-1987	MONICA, Rhein-Neckar Region	Community	Urban	25-64	25-64	1489	1609	included in 'Survey data' tab
DEU_1986_INTERSALT-Bernried	Germany	1985-1986	INTERSALT, Bernried	Community	Urban	20-59	20-59	99	98	included in 'Survey data' tab
DEU_1987_MONICA-ERF	Germany	1987-1988	MONICA, Erfurt	Community	Urban	25-64	25-64	871	909	included in 'Survey data' tab
DEU_1988_MONICA-BERa	Germany	1988	MONICA, Berlin-Lichtenberg	Community	Urban	25-64	25-64	690	728	included in 'Survey data' tab
DEU_1988_MONICA-BRE1	Germany	1988	MONICA, Bremen North/West	Community	Urban	25-69	25-69	619	632	included in 'Survey data' tab
DEU_1988_MONICA-BRE2	Germany	1988	MONICA, Bremen Center/South/East	Community	Urban	25-69	25-69	499	582	included in 'Survey data' tab
DEU_1988_MONICA-CHM	Germany	1988	MONICA, Chemnitz	Community	Urban	25-64	25-64	288	382	included in 'Survey data' tab
DEU_1988_MONICA-ZWK	Germany	1988	MONICA, Zwickau	Community	Urban	25-64	25-64	193	250	included in 'Survey data' tab
DEU_1989_MONICA-COTa	Germany	1989-1990	MONICA, Cottbus County	Community	Urban	25-64	25-64	539	529	included in 'Survey data' tab
DEU_1989_MONICA-HACa	Germany	1988-1989	MONICA, Halle County	Subnational	Urban	25-64	25-64	959	1201	included in 'Survey data' tab
DEU_1989_MONICA-KMS	Germany	1988-1989	MONICA, Rest of Karl-Marx-Stadt County	Subnational	Urban	25-64	25-64	541	626	included in 'Survey data' tab
DEU_1990_MONICA-AUG	Germany	1989-1990	MONICA, Augsburg	Community	Both	25-64	25-64	1933	1944	included in 'Survey data' tab
DEU_1991_MONICA-BRE1	Germany	1991-1992	MONICA, Bremen North/West	Community	Urban	25-69	25-69	599	671	included in 'Survey data' tab
DEU_1991_MONICA-BRE2	Germany	1991-1992	MONICA, Bremen Center/South/East	Community	Urban	25-69	25-69	524	546	included in 'Survey data' tab
DEU_1992_MONICA-ERF	Germany	1991-1992	MONICA, Erfurt	Community	Urban	25-64	25-64	587	572	included in 'Survey data' tab
DEU_1994_MONICA-CHM	Germany	1993-1994	MONICA, Chemnitz	Community	Urban	25-64	25-64	408	424	included in 'Survey data' tab
DEU_1994_MONICA-ZWK	Germany	1993-1994	MONICA, Zwickau	Community	Urban	25-64	25-64	139	186	included in 'Survey data' tab
DEU_1995_MONICA-AUG	Germany	1994-1995	MONICA, Augsburg	Community	Both	25-64	25-64	1898	1968	included in 'Survey data' tab
DEU_1986_10276005	Germany	1985-1986	CINDI	Subnational	Both	25-64	25-64	1875	1990	contact
DEU_1988_GCP	Germany	1988	German Cardiovascular Prevention Study (GCP) - National Health Survey 1988	Subnational	Both	25-69	25-69	2642	2678	contact
DEU_1989_10276006	Germany	1988-1989	CINDI	Subnational	Both	25-64	25-64	1361	1435	contact
DEU_1991_10276132	Germany	1990-1992	European Community Respiratory Health Survey, Hamburg	Community	Urban	20-47	20-47	146	138	contact
DEU_1991_10276133	Germany	1990-1992	European Community Respiratory Health Survey, Erfurt	Community	Urban	20-47	20-47	146	124	contact
DEU_1992_10276007	Germany	1991-1992	CINDI	Subnational	Both	25-64	25-64	1326	1400	contact
DEU_1992_GCP	Germany	1991-1992	German Cardiovascular Prevention Study (GCP) - National Health Survey 1991	Subnational	Both	25-69	25-69	2599	2670	contact
DEU_1992_GCPEast	Germany	1991-1992	First National Examination of Life Conditions, Environment and Health in East Germany 1991/92	Subnational	Both	25-69	25-69	1042	1155	contact
DEU_1996_EPICheidelberg	Germany	1994-1998	EPIC Heidelberg	Community	Urban	40-64	35-64	11680	13458	contact
DEU_1996_EPICpotsdam	Germany	1994-1998	EPIC Potsdam	Community	Urban	40-64	35-64	10224	15995	contact
DEU_1998_BGS	Germany	1997-1999	German National Health Interview and Examination Survey (GNHIES98)	National	Both	18-79	18-79	3435	3608	contact
DEU_1999_SHIP	Germany	1997-2001	Study of Health in Pomerania (SHIP-0) baseline study	Subnational	Both	20-80	20-80	2111	2187	contact
DEU_2000_KORAS4	Germany	1999-2001	KORA S4 Study: Kooperative Research in the Region of Augsburg Survey 4	Community	Both	24-75	24-75	2076	2148	contact
DEU_2001_10276132	Germany	2000-2001	European Community Respiratory Health Survey, Hamburg	Community	Urban	30-57	30-57	146	138	contact
DEU_2001_10276133	Germany	2000-2001	European Community Respiratory Health Survey, Erfurt	Community	Urban	30-57	30-57	146	124	contact
DEU_2001_ESTHER	Germany	2000-2002	Epidemiological study of the chances of prevention, early recognition and optimal treatment of chronic diseases in an elderly population (ESTHER)	Subnational	Both	50-75	50-75	4344	5334	contact
DEU_2002_10276445	Germany	2000-2003	Heinz Nixdorf Recall Study	Community	Urban	45-74	45-74	2375	2393	contact
DEU_2002_EMIL	Germany	2002	Echinoccoccus Multilocularis and Internal Diseases in Leutkirch	Community	Urban	12-65	12-65	1171	1261	contact
DEU_2002_HNRS	Germany	2000-2003	Heinz Nixdorf Recall Study	Subnational	Urban	45-75	45-75	2380	2401	contact
DEU_2004_SHIP	Germany	2002-2006	Study of Health in Pomerania (SHIP-1) 5-year follow-up	Subnational	Both	25-85	25-85	1583	1707	contact
DEU_2007_HNRS	Germany	2005-2008	Heinz Nixdorf Recall Study	Subnational	Both	50-80	50-80	2044	2099	contact
DEU_2007_KORAF4	Germany	2006-2008	KORA F4 Study: Kooperative Research in the Region of Augsburg Follow-Up of Survey 4	Community	Both	31-81	31-81	1480	1583	contact
DEU_2009_ESTHER	Germany	2008-2011	Epidemiological study of the chances of prevention, early recognition and optimal treatment of chronic diseases in an elderly population (ESTHER)	Subnational	Both	58-84	58-84	1468	1622	contact
DEU_2010_DEGS1	Germany	2008-2011	German Health Interview and Examination Survey for adults 2008-11 (DEGS1)	National	Both	18-79	18-79	3389	3650	contact
DEU_2010_SHIPTREND	Germany	2008-2012	Study of Health in Pomerania, second cohort (SHIP-TREND)	Subnational	Both	20-79	20-79	2099	2232	contact
DEU_2013_HNRS	Germany	2011-2014	Heinz Nixdorf Recall Study	Subnational	Both	56-85	56-85	1493	1560	contact
GHA_1993_DHS	Ghana	1993	DHS	National	Both		20-49		1650	included in 'Survey data' tab
GHA_1998_DHS	Ghana	1998	DHS	National	Both		20-49		1979	included in 'Survey data' tab
GHA_2003_DHS	Ghana	2003	DHS	National	Both		15-49		4935	included in 'Survey data' tab
GHA_2006_STEPS	Ghana	2006	STEPS	Community	Urban	25+	25+	841	1635	included in 'Survey data' tab
GHA_2008_DHS	Ghana	2008	DHS	National	Both		15-49		4455	included in 'Survey data' tab
GHA_2008_SAGE	Ghana	2007-2008	SAGE	National	Both	50+	50+	2192	1987	included in 'Survey data' tab
GHA_2014_DHS	Ghana	2014	DHS	National	Both	15-59	15-49	4416	4486	included in 'Survey data' tab
GHA_1997_21288016	Ghana	1997	Amoah et al., Ethn Dis 13(2 Suppl 2):S97-101, 2003	Community	Both	25+	25+	1857	2875	contact
GHA_2001_21288011	Ghana	2001	Addo et al., Ethn Dis 16(4):894-99, 2006	Community	Rural	15+	15+	89	206	contact
GHA_2002_21288036	Ghana	2002	Amoah et al., Ethn Dis 13(2 Suppl 2):S97-101, 2003	Community	Both	25+	25+	1859	2947	contact
GHA_2002_21288050	Ghana	2001-2002	Cappuccio et al., Hypertension 43(5):1017-22, 2004	Community	Both	35-84	35-84	194	338	contact
GHA_2003_ACCRA	Ghana	2003	Women's Health Study of Accra (WHSA-I)	Community	Urban		18+		1184	contact
GHA_2009_ACCRA	Ghana	2008-2010	Women's Health Study of Accra (WHSA-II)	Community	Urban		18+		2677	contact
GHA_2013_RODAM-rural	Ghana	2012-2014	Research on Obesity and Diabetes among African Migrants (RODAM), control group	Subnational	Rural	25+	25+	431	676	contact
GHA_2013_RODAM-urban	Ghana	2012-2014	Research on Obesity and Diabetes among African Migrants (RODAM), control group	Subnational	Urban	25+	25+	418	1034	contact
GRC_1996_EPIC	Greece	1991-1999	EPIC	National	Both	19-86	19-86	11578	16477	contact
GRC_1997_Didima	Greece	1997	The Didima Study	Community	Rural	18+	18+	265	373	contact
GRC_2001_10300341	Greece	2000-2001	Karalis et al., BMC Public Health7:351, 2007	Community	Rural	5+	5+	73	87	contact
GRC_2014_HNNHS	Greece	2013-2015	Hellenic National Nutrition and Health Survey (HNNHS)	National	Both	5+	5+	1781	2420	contact
GRC_2015_EMENO	Greece	2013-2016	National Survey of Morbidity and Risk Factors	National	Both	18+	18+	2039	2726	contact
GRC_2016_SKG	Greece	2016	SKG-Elderly	Community	Urban	60+	60+	51	63	contact
GRC_2018_thessa	Greece	2018	STEPS-Thessaloniki	Community	Both	60+	60+	353	141	contact
GRL_2008_IHIT	Greenland	2005-2010	Population Health Survey in Greenland	National	Both	18+	18+	1336	1714	contact
GRD_2011_STEPS	Grenada	2011	STEPS	National	Both	25-64	25-64	438	637	included in 'Survey data' tab
GTM_1995_DHS	Guatemala	1995	DHS	National	Both		20-49		4547	included in 'Survey data' tab
GTM_1999_DHS	Guatemala	1998-1999	DHS	National	Both		20-49		2172	included in 'Survey data' tab
GTM_2015_DHS	Guatemala	2014-2015	DHS	National	Both		15-49		24195	included in 'Survey data' tab
GTM_2002_CAMDI	Guatemala	2001-2002	CAMDI	Community	Urban	20+	20+	293	638	contact
GTM_2002_RHS	Guatemala	2002	Reproducive Health Survey	National	Both	15-59	15-49	2164	7374	contact
GTM_2004_INSTC	Guatemala	2003-2005	The Institute of Nutrition of Central America and Panama Nutrition Supplementation Trial Cohort	Community	Both	25-41	25-41	268	288	contact
GTM_2009_ENSMI	Guatemala	2008-2009	Encuesta Nacional de Salud Materno Infantil	National	Both	15-59	15-49	6636	15271	contact
GIN_1999_DHS	Guinea	1999	DHS	National	Both		20-49		2984	included in 'Survey data' tab
GIN_2005_DHS	Guinea	2005	DHS	National	Both		15-49		3574	included in 'Survey data' tab
GIN_2009_STEPS	Guinea	2009	STEPS	Subnational	Both	15-64	15-64	1124	1232	included in 'Survey data' tab
GIN_2012_DHS	Guinea	2012	DHS	National	Both		15-49		4229	included in 'Survey data' tab
GIN_2018_DHS	Guinea	2018	DHS	National	Both		15-49		4905	included in 'Survey data' tab
GNB_2010_MICS	Guinea Bissau	2010	Multiple Indicator Cluster Survey	National	Both		15-49		7676	contact
GUY_2009_DHS	Guyana	2009	DHS	National	Both	15-49	15-49	3412	4575	included in 'Survey data' tab
GUY_2016_STEPS	Guyana	2016	STEPS	National	Both	18-69	18-69	1060	1571	included in 'Survey data' tab
HTI_1995_DHS	Haiti	1994-1995	DHS	National	Both		20-49		1788	included in 'Survey data' tab
HTI_2000_DHS	Haiti	2000	DHS	National	Both		15-49		9163	included in 'Survey data' tab
HTI_2006_DHS	Haiti	2005-2006	DHS	National	Both		15-49		5011	included in 'Survey data' tab
HTI_2012_DHS	Haiti	2012	DHS	National	Both		15-49		8993	included in 'Survey data' tab
HTI_2017_DHS	Haiti	2016-2017	DHS	National	Both		15-49		9049	included in 'Survey data' tab
HTI_2016_Carrefour	Haiti	2015-2016	Carrefour	Community	Urban	25-65	25-65	557	835	contact
HTI_2016_Thomonde	Haiti	2015-2016	Thomonde	Community	Rural	25-65	25-65	254	441	contact
HND_2006_DHS	Honduras	2005-2006	DHS	National	Both		15-49		18125	included in 'Survey data' tab
HND_2012_DHS	Honduras	2011-2012	DHS	National	Both		15-49		21097	included in 'Survey data' tab
HND_1996_HNMS	Honduras	1996	Honduras National Micronutrient Survey	National	Both		20-40		722	contact
HND_2004_CAMDI	Honduras	2003-2004	CAMDI	Community	Urban	20+	20+	428	764	contact
HUN_1985_INTERSALT	Hungary	1985	INTERSALT	Community	Rural	20-59	20-59	100	100	included in 'Survey data' tab
HUN_1988_MONICA-BUDa	Hungary	1987-1988	MONICA, Budapest	Community	Urban	25-64	25-64	1413	1594	included in 'Survey data' tab
HUN_1988_MONICA-PECa	Hungary	1987-1988	MONICA, Pecs	Community	Urban	25-64	25-64	1573	1510	included in 'Survey data' tab
HUN_1987_FHRNS	Hungary	1985-1988	First Hungarian Representative Nutrition Survey	National	Both	15+	15+	3079	8916	contact
HUN_2003_EMAS	Hungary	2003	The European Male Ageing Study	Community	Both	40+		428		contact
HUN_2008_EMAS	Hungary	2008	The European Male Ageing Study	Community	Both	40+		349		contact
ISL_1985_INTERSALT	Iceland	1985-1986	INTERSALT	Community	Urban	20-59	20-59	100	100	included in 'Survey data' tab
ISL_1989_MONICA-Arnes	Iceland	1988-1989	MONICA, Arnes County	Community	Rural	25-64	25-64	385	435	included in 'Survey data' tab
ISL_1989_MONICA-Reyk	Iceland	1988-1989	MONICA, Reykjavik	Subnational	Urban	25-64	25-64	414	443	included in 'Survey data' tab
ISL_1993_MONICA-Arnes	Iceland	1993-1994	MONICA, Arnes County	Community	Rural	25-64	25-64	422	484	included in 'Survey data' tab
ISL_1993_MONICA-Reyk	Iceland	1993-1994	MONICA, Reykjavik	Subnational	Urban	25-64	25-64	441	448	included in 'Survey data' tab
ISL_1986_RVKSTM	Iceland	1985-1987	The Reykjavik Study (Men)	Subnational	Urban	51-79		2584		contact
ISL_1989_RVKSTW	Iceland	1987-1991	The Reykjavik Study (Women)	Subnational	Urban		52-82		2993	contact
ISL_1993_RVKSTM	Iceland	1991-1994	The Reykjavik Study (Men)	Subnational	Urban	70-86		797		contact
ISL_1995_RVKSTW	Iceland	1994-1996	The Reykjavik Study (Women)	Subnational	Urban		69-88		1101	contact
ISL_2002_YRVKST	Iceland	2001-2003	The Reykjavik Study for the young	Subnational	Urban	47-62	47-62	626	705	contact
ISL_2004_AGES	Iceland	2002-2006	AGES-Reykjavik Study	Subnational	Urban	66-96	66-96	2413	3272	contact
ISL_2008_REFINE	Iceland	2005-2011	Risk Evaluation For INfarct Estimates (REFINE)	Subnational	Urban	20-73	20-73	3402	3525	contact
ISL_2009_AGESII	Iceland	2007-2011	AGES-Reykjavik Study - follow up visit	Subnational	Urban	71-98	71-98	1389	1928	contact
ISL_2011_REFINELO	Iceland	2010-2012	Risk Evaluation For INfarct Estimates (REFINE) follow-up visit (REFINELO)	Subnational	Urban	26-74	26-74	653	667	contact
ISL_2013_REFLOCT	Iceland	2012-2013	Risk Evaluation For INfarct Estimates (REFINE) - follow-up visit (REFLOCT)	Subnational	Urban	55-73	55-73	516	561	contact
IND_1986_INTERSALT	India	1986	INTERSALT	Community	Urban	20-59	20-59	100	99	included in 'Survey data' tab
IND_1999_DHS	India	1998-1999	DHS	National	Both		20-49		72536	included in 'Survey data' tab
IND_2006_DHS	India	2005-2006	DHS	National	Both	15-54	15-49	71463	115828	included in 'Survey data' tab
IND_2008_SAGE	India	2007-2008	SAGE	National	Both	50+	50+	3213	3147	included in 'Survey data' tab
IND_2013_DLHS4CAB	India	2012-2013	District Level Household and Facility Survey (DLHS) 4	National	Both	5+	5+	538808	602926	included in 'Survey data' tab
IND_2014_AHSCAB	India	2014	Annual Health Survey-Chemical, Anthropometric	National	Both	5+	5+	658441	680611	included in 'Survey data' tab
IND_2016_DHS	India	2015-2016	DHS	National	Both	15-54	15-49	108751	655681	included in 'Survey data' tab
IND_1989_citRamachandran	India	1988-1989	Rmachandran et al., Diabetes Res Clin Pract 58(1):55-60, 2002	Community	Urban	20-74	20-74	455	437	contact
IND_1990_NNMB	India	1990	National Nutrition Monitoring Bureau Rural Survey	National	Rural	5+	5+	7607	9649	contact
IND_1993_43560281	India	1991-1995	Reddy et al., Obes Rev 3(3):197-202, 2002	Community	Rural	35-64	35-64	1070	1332	contact
IND_1993_43560282	India	1991-1995	Reddy et al., Obes Rev 3(3):197-202, 2002	Community	Urban	35-64	35-64	1456	1594	contact
IND_1993_43560971	India	1991-1994	Prabhakaran et al., Chronic Illn 3(1):8-19, 2007	Community	Rural	35-64	35-64	542	630	contact
IND_1993_43560972	India	1991-1994	Prabhakaran et al., Chronic Illn 3(1):8-19, 2007	Community	Urban	35-64	35-64	1388	1455	contact
IND_1993_JHW-rural	India	1992-1994	Jaipur Heart Watch 1	Community	Rural	20-80	20-80	1946	1147	contact
IND_1993_JHW-urban	India	1992-1994	Jaipur Heart Watch 1	Community	Urban	20-80	20-80	1385	782	contact
IND_1994_4356026	India	1993-1994	Khongsdier, Eur J Clin Nutr 56(6):484-89, 2002	Community	Both	18-59		575		contact
IND_1994_MCS	India	1991-1997	Mumbai Cohort Study	Community	Urban	35+	35+	88658	59515	contact
IND_1995_citRamachandran	India	1995	Shobana et al., Diabetes Res Clin Pract 42(3):181–86, 1998	Community	Urban	20-74	20-74	1061	1093	contact
IND_1996_4356101	India	1995-1996	Kusuma et al., Ann Hum Biol 29(5):502-12, 2002	Community	Both	15-84	15-84	747	737	contact
IND_1996_ACES	India	1995-1997	Aravind Comprehensive Eye Survey	Community	Rural	40+	40+	2308	2830	contact
IND_1996_EPIBPAP	India	1995-1996	Epidemiology of blood pressure across cross-cultural populations of Visakhapatnam district, Andhra Pradesh, India	Community	Rural	19-76	19-76	209	228	contact
IND_1996_KA	India	1995-1997	Kashmiri Adults	Subnational	Both	40+	40+	2496	2587	contact
IND_1997_citRamachandran	India	1997	Ramachandran et al., Diabetes Res Clin Pract 44(3):207–13, 1999	Community	Rural	20-74	20-74	738	879	contact
IND_1997_NNMB	India	1996-1997	National Nutrition Monitoring Bureau Rural Survey	National	Rural	5+	5+	22155	27802	contact
IND_1998_CUPS	India	1996-1999	Chennai Urban Population Study	Community	Urban	20+	20+	557	705	contact
IND_2000_4356059	India	1998-2001	Chennai Prospective Study	Community	Urban	35+	35+	264848	235968	contact
IND_2000_citRamachandran	India	2000	Ramachandran et al., Diabet Med, 20(3):220-24, 2003	Subnational	Urban	20-75	20-75	4640	5257	contact
IND_2000_JHW2	India	1999-2001	Jaipur Heart Watch 2	Community	Urban	20-75	20-75	534	569	contact
IND_2000_VBC	India	1998-2002	Vellore Birth Cohort	Subnational	Both	25-31	25-31	1160	1050	contact
IND_2001_NDBC	India	1999-2002	New Delhi Birth Cohort	Community	Urban	26-33	26-33	886	638	contact
IND_2001_NNMB	India	2000-2001	National Nutrition Monitoring Bureau Rural Survey	National	Rural	5+	5+	18046	24844	contact
IND_2003_4356098	India	2002-2003	JHW-3	Community	Urban	20-59	20-59	179	195	contact
IND_2003_CURES	India	2001-2004	Chennai Urban Rural Epidemiology Study	Community	Urban	20+	20+	1094	1254	contact
IND_2003_EPIBPO	India	2002-2003	Blood pressure epidemiology in tribal, rural and urban communities of Orissa with special reference to physical and social parameters	Community	Rural	18-80	18-80	200	186	contact
IND_2004_STEPS-Ballabgarh-rural	India	2003-2005	India STEPS Ballabgarh	Subnational	Rural	15-69	15-69	1360	1468	contact
IND_2004_STEPS-Ballabgarh-urban	India	2003-2005	India STEPS Ballabgarh	Subnational	Urban	15-69	15-69	1263	1294	contact
IND_2004_STEPS-Chennai-rural	India	2003-2005	India STEPS Chennai	Subnational	Rural	15-69	15-69	1372	1338	contact
IND_2004_STEPS-Chennai-urban	India	2003-2005	India STEPS Chennai	Subnational	Urban	15-69	15-69	1282	1282	contact
IND_2004_STEPS-Delhi-urban	India	2003-2005	India STEPS Delhi	Subnational	Urban	15-69	15-69	1250	1265	contact
IND_2004_STEPS-Dibrugarh-rural	India	2003-2005	India STEPS Dibrugarh	Subnational	Rural	15-69	15-69	1460	1410	contact
IND_2004_STEPS-Dibrugarh-urban	India	2003-2005	India STEPS Dibrugarh	Subnational	Urban	15-69	15-69	1243	1254	contact
IND_2004_STEPS-Nagpur-rural	India	2003-2005	India STEPS Nagpur	Subnational	Rural	15-69	15-69	1252	1256	contact
IND_2004_STEPS-Nagpur-urban	India	2003-2005	India STEPS Nagpur	Subnational	Urban	15-69	15-69	1252	1261	contact
IND_2004_STEPS-Trivandrum-rural	India	2003-2005	India STEPS Trivandrum	Subnational	Rural	15-69	15-69	1199	1324	contact
IND_2004_STEPS-Trivandrum-urban	India	2003-2005	India STEPS Trivandrum	Subnational	Urban	15-69	15-69	1250	1252	contact
IND_2005_4356098	India	2004-2005	JHW-4	Community	Urban	20-59	20-59	413	473	contact
IND_2006_citRamachandran	India	2006	Ramachandran et al., Diabetes Care 31(5):893-98, 2008	Community	Both	20+	20+	3321	3745	contact
IND_2006_IJMRNCD	India	2005-2006	Risk factor profile for chronic non-communicable diseases: Results of a community-based study in Kerala, India	Community	Both	15-64	15-64	2795	2926	contact
IND_2006_NNMB	India	2005-2006	National Nutrition Monitoring Bureau Rural Survey	National	Rural	5+	5+	20448	25272	contact
IND_2006_TAMIL	India	2005-2007	Prevalence of cardiovascular risk factors in rural Tamil Nadu	Community	Rural	25-65	25-65	4927	5573	contact
IND_2007_4356102	India	2006-2007	Kusuma et al., Asia Pac J Public Health 21(4):497-507, 2009	Community	Urban	15-74	15-74	182	192	contact
IND_2007_CIEMS	India	2006-2008	Central India Eye and Medical Study	Community	Rural	30+	30+	2190	2518	contact
IND_2007_KYA	India	2006-2008	Kashmiri Young Adults	Subnational	Both	20-40	20-40	2119	905	contact
IND_2008_Bengali	India	2005-2011	Bengali School Children	Community	Urban	7-21	7-21	847	2180	contact
IND_2008_IDSP-Andhra	India	2007-2008	Integrated Disease Surveillance Project Non-communicable Disease Risk Factors Survey Andhra Pradesh	Subnational	Both	15-64	15-64	2674	3390	contact
IND_2008_IDSP-Kerala	India	2007-2008	Integrated Disease Surveillance Project Non-communicable Disease Risk Factors Survey Kerala	Subnational	Both	15-64	15-64	1672	2403	contact
IND_2008_IDSP-Madhya	India	2007-2008	Integrated Disease Surveillance Project Non-communicable Disease Risk Factors Survey Madhya Pradesh	Subnational	Both	15-64	15-64	2797	2862	contact
IND_2008_IDSP-Maharashtra	India	2007-2008	Integrated Disease Surveillance Project Non-communicable Disease Risk Factors Survey Maharashtra	Subnational	Both	15-64	15-64	3025	2921	contact
IND_2008_IDSP-Mizoram	India	2007-2008	Integrated Disease Surveillance Project Non-communicable Disease Risk Factors Survey Mizoram	Subnational	Both	15-64	15-64	2232	2108	contact
IND_2008_IDSP-Tamil	India	2007-2008	Integrated Disease Surveillance Project Non-communicable Disease Risk Factors Survey Tamil Nadu	Subnational	Both	15-64	15-64	2039	2928	contact
IND_2008_IDSP-Uttrakhand	India	2007-2008	Integrated Disease Surveillance Project Non-communicable Disease Risk Factors Survey Uttrakhand	Subnational	Both	15-64	15-64	2094	3110	contact
IND_2008_Nagpur	India	2007-2009	Prevalence of NCD risk factor in people above 15 year in rural area Nagpur using WHO STEP approach	Community	Rural	15+	15+	1984	1828	contact
IND_2008_NDBC	India	2006-2009	New Delhi Birth Cohort	Community	Urban	33-38	33-38	650	445	contact
IND_2009_INDIAB	India	2008-2010	ICMR India Diabetes Study	National	Both	20+	20+	6953	6889	contact
IND_2010_Kerala	India	2010	Kerala 2010 follow-up	Community	Rural	21-70	21-70	214	237	contact
IND_2010_NCDGD-rural	India	2009-2010	Baseline Survey for the assessment of prevalence of risk factors of NCDs in Gandhinagar District	Community	Rural	15-64	15-64	875	774	contact
IND_2010_NCDGD-urban	India	2009-2010	Baseline Survey for the assessment of prevalence of risk factors of NCDs in Gandhinagar District	Community	Urban	15-64	15-64	895	890	contact
IND_2011_LASI	India	2010-2011	Longitudinal Aging Study in India	Subnational	Both	45+	45+	630	678	contact
IND_2012_NNMB	India	2011-2012	National Nutrition Monitoring Bureau Rural Survey	National	Rural	5+	5+	34447	43063	contact
IND_2013_INDIAB	India	2012-2013	ICMR-India Diabetes (INDIAB) Study, Phase II	Subnational	Both	20+	20+	8165	10755	contact
IND_2014_INDIAB	India	2012-2015	ICMR-India Diabetes (INDIAB) Study, North East Phase	National	Both	20+	20+	10334	12649	contact
IND_2014_VBC	India	2013-2014	Vellore Birth Cohort	Subnational	Both	39-44	39-44	580	499	contact
IND_2016_NNMB	India	2015-2016	Diet and nutritional status of urban population and prevalence of hypertension	National	Urban	5+	5+	68893	81999	contact
IND_2018_VBC	India	2016-2019	Vellore Birth Cohort	Subnational	Both	43-48	43-48	843	758	contact
IDN_1994_IFLS	Indonesia	1993-1994	Indonesian Family Life Surveys	National	Both	5+	5+	8889	10205	included in 'Survey data' tab
IDN_1998_IFLS	Indonesia	1997-1998	Indonesian Family Life Surveys	National	Both	5+	5+	12154	13897	included in 'Survey data' tab
IDN_2001_IFLS	Indonesia	2000-2001	Indonesian Family Life Surveys	National	Both	5+	5+	15442	16225	included in 'Survey data' tab
IDN_2008_IFLS	Indonesia	2007-2008	Indonesian Family Life Surveys	National	Both	5+	5+	17869	19157	included in 'Survey data' tab
IDN_2015_IFLS	Indonesia	2014-2015	Indonesian Family Life Surveys	National	Both	5+	5+	20328	21540	included in 'Survey data' tab
IDN_1985_5360049	Indonesia	1983-1987	Strickland et al., Eur J Clin Nutr 48 Suppl 3: S98-108; discussion S-9, 1994	Community	Both	18+	18+	447	564	contact
IDN_2001_5360073	Indonesia	2001	Ng et al., Bull World Health Organ 84(4):305-13, 2006	Community	Both	15-74	15-74	1261	1234	contact
IDN_2001_5360601	Indonesia	2001	STEPS/SURKESNAS	National	Both	15-64	15-64	4100	4775	contact
IDN_2003_GESOPA	Indonesia	2003	A genetic-ecological study of the risk foctors for lifestyle-related diseases in Oceanian populations, Study A	Community	Rural	18-79	18-79	99	103	contact
IDN_2003_GESOPB	Indonesia	2003	A genetic-ecological study of the risk foctors for lifestyle-related diseases in Oceanian populations, Study B	Community	Rural	18-79	18-79	100	140	contact
IDN_2006_5360059	Indonesia	2006	Jakarta Non Communicable Disease Risk Factor Surveillance	Community	Urban	25-64	25-64	641	950	contact
IDN_2013_RiskesdasAdults	Indonesia	2013	Population Health Basic Health Research 2013 (Riskesdas 2013)	National	Both	20+	20+	299439	328085	contact
IRN_1998_15364082	Iran	1997-1998	Khadivzadeh, East Mediterr Health J 8(4-5):612-18, 2002	Community	Urban		15-49		1513.38	contact
IRN_2000_15364103	Iran	2000	Asadabadi Study	Community	Urban	18+	18+	132	168	contact
IRN_2000_NHS	Iran	1999-2000	National Health Survey II	National	Both	5+	5+	23727	26636	contact
IRN_2000_TLGS	Iran	1999-2001	Tehran Lipid and Glucose Study	Community	Urban	5+	5+	6339	7988	contact
IRN_2001_IHHP-Arak-rural	Iran	2001	Isfahan Healthy Heart Program, Arak rural	Community	Rural	19+	19+	1023	1080	contact
IRN_2001_IHHP-Arak-urban	Iran	2001	Isfahan Healthy Heart Program, Arak urban	Community	Urban	19+	19+	2084	2124	contact
IRN_2001_IHHP-Isfahan-rural	Iran	2001	Isfahan Healthy Heart Program, Isfahan rural	Community	Rural	19+	19+	232	233	contact
IRN_2001_IHHP-Isfahan-urban	Iran	2001	Isfahan Healthy Heart Program, Isfahan urban	Community	Urban	19+	19+	1760	1912	contact
IRN_2001_IHHP-Najaf-Abad-rural	Iran	2001	Isfahan Healthy Heart Program, Najaf Abad rural	Community	Rural	19+	19+	405	416	contact
IRN_2001_IHHP-Najaf-Abad-urban	Iran	2001	Isfahan Healthy Heart Program, Najaf Abad urban	Community	Urban	19+	19+	573	571	contact
IRN_2004_15364059	Iran	2004	Hajian-Tilaki et al., Obes Rev 8(1):3-10, 2007	Community	Urban	20-70	20-70	1800	1800	contact
IRN_2004_PGHHS	Iran	2003-2004	The Persian Gulf Healthy Heart Study	Subnational	Urban	25-75	25-75	1736	1973	contact
IRN_2004_TLGS	Iran	2002-2005	Tehran Lipid and Glucose Study	Community	Urban	5+	5+	2736	3388	contact
IRN_2005_citDastgiri	Iran	2005	Dastgiri et al., J Public Health Nutr 2006; 9: 996-1000	Subnational	Urban	15-70	15-70	130	167	contact
IRN_2005_STEPS	Iran	2005	STEPS	National	Both	15-64	15-64	40722	39748	contact
IRN_2006_15364074	Iran	2005-2006	Rashidy-Pour, Obes Rev (1):2-6, 2009	Subnational	Both	30-70	30-70	1695	2104	contact
IRN_2006_GCSrural	Iran	2004-2008	Golestan Cohort Study Main Phase	Subnational	Rural	40-75	40-75	17298	22708	contact
IRN_2006_GCSurban	Iran	2004-2008	Golestan Cohort Study Main Phase	Community	Urban	40-75	40-75	3931	6100	contact
IRN_2006_STEPS	Iran	2006	STEPS	National	Both	16-65	16-65	14885	14617	contact
IRN_2007_IHHP-Arak-rural	Iran	2007	Isfahan Healthy Heart Program, Arak rural	Community	Rural	19+	19+	1028	1024	contact
IRN_2007_IHHP-Arak-urban	Iran	2007	Isfahan Healthy Heart Program, Arak urban	Community	Urban	19+	19+	1424	1359	contact
IRN_2007_IHHP-Isfahan-rural	Iran	2007	Isfahan Healthy Heart Program, Isfahan rural	Community	Rural	19+	19+	155	151	contact
IRN_2007_IHHP-Isfahan-urban	Iran	2007	Isfahan Healthy Heart Program, Isfahan urban	Community	Urban	19+	19+	1309	1302	contact
IRN_2007_IHHP-Najaf-Abad-rural	Iran	2007	Isfahan Healthy Heart Program, Najaf Abad rural	Community	Rural	19+	19+	254	253	contact
IRN_2007_IHHP-Najaf-Abad-urban	Iran	2007	Isfahan Healthy Heart Program, Najaf Abad urban	Community	Urban	19+	19+	494	542	contact
IRN_2007_STEPS-n	Iran	2007	STEPS	National	Both	15-64	15-64	2372	2312	contact
IRN_2007_STEPS-p	Iran	2007	STEPS	National	Both	15-64	15-64	14867	14550	contact
IRN_2007_TLGS	Iran	2005-2008	Tehran Lipid and Glucose Study	Community	Urban	5+	5+	3104	3808	contact
IRN_2008_STEPS	Iran	2008	STEPS	National	Both	15-64	15-64	14757	14353	contact
IRN_2009_STEPS	Iran	2009	STEPS	National	Both	15-64	15-64	14834	14495	contact
IRN_2010_PGHHS	Iran	2009-2010	The Persian Gulf Healthy Heart Study	Subnational	Urban	31-79	31-79	834	1016	contact
IRN_2010_TLGS4	Iran	2008-2011	Tehran Lipid and Glucose Study	Community	Urban	20+	20+	4622	5884	contact
IRN_2011_GCSrural	Iran	2010-2012	Golestan Cohort Study Second Phase	Subnational	Rural	43-82	43-82	4325	4919	contact
IRN_2011_GCSurban	Iran	2010-2012	Golestan Cohort Study Second Phase	Community	Urban	43-82	43-82	1091	1061	contact
IRN_2011_STEPS	Iran	2011	STEPS	National	Both	6-69	6-69	4903	6548	contact
IRN_2011_YES	Iran	2010-2011	The Yazd Eye Study	Subnational	Both	40-80	40-80	876	1012	contact
IRN_2012_Amolrural	Iran	2011-2012	Amol county study	Community	Rural	10+	10+	1862	1098	contact
IRN_2012_Amolurban	Iran	2011-2012	Amol county study	Community	Urban	10+	10+	1624	1548	contact
IRN_2012_NIMS2	Iran	2012	National Integrated Micronutrient Survey (NIMS) 2012	National	Both	6-60	6-60	10526	11087	contact
IRN_2012_Tehran	Iran	2012-2013	Tehran City	Community	Urban	10-90	10-90	419	537	contact
IRN_2013_PCS	Iran	2012-2014	Pars Cohort Study	Community	Rural	40-90	40-90	4272	4987	contact
IRN_2013_Zahedan	Iran	2012-2013	Zahedan City	Community	Urban	10-90	10-90	1377	1205	contact
IRN_2014_BEHP	Iran	2013-2014	Bushehr Elderly Health Program (BEH)	Community	Urban	60+	60+	1437	1514	contact
IRN_2014_GES	Iran	2013-2014	Gilan Eye Study	Subnational	Both	50+	50+	1059	1439	contact
IRN_2015_Fasa	Iran	2014-2016	The PERSIAN Fasa Cohort Study	Community	Both	35-70	35-70	4463	5384	contact
IRN_2015_Guilan	Iran	2014-2016	The PERSIAN Guilan Cohort Study	Community	Both	35-70	35-70	4881	5611	contact
IRN_2015_Kermanshah	Iran	2014-2016	The PERSIAN Kermanshah Cohort Study	Community	Both	35-70	35-70	4746	5167	contact
IRN_2015_Kharameh	Iran	2014-2016	The PERSIAN Kharameh Cohort Study	Community	Both	35-70	35-70	4707	5860	contact
IRN_2015_Tabriz	Iran	2014-2016	The PERSIAN Tabriz Cohort Study	Community	Both	35-70	35-70	6644	8140	contact
IRN_2016_Mazandaran	Iran	2015-2017	The PERSIAN Mazandaran Cohort Study	Community	Both	35-70	35-70	4115	6029	contact
IRN_2016_Rafsanjan	Iran	2015-2017	The PERSIAN Rafsanjan Cohort Study	Community	Both	35-70	35-70	5152	5300	contact
IRN_2016_STEPS	Iran	2016	STEPS	National	Both	18+	18+	14080	15036	contact
IRN_2016_Yazd	Iran	2015-2017	The PERSIAN Yazd Cohort Study	Community	Both	30-70	30-70	4947	4819	contact
IRN_2017_Ahvaz	Iran	2016-2018	The PERSIAN Ahvaz Cohort Study	Community	Both	35-70	35-70	3982	5833	contact
IRN_2017_BandarKong	Iran	2016-2018	The PERSIAN BandarKong Cohort Study	Community	Both	35-70	35-70	1702	2260	contact
IRN_2017_Urmia	Iran	2016-2018	The PERSIAN Urmia Cohort Study	Community	Both	35-70	35-70	2161	2796	contact
IRN_2017_Zahedan	Iran	2015-2018	The PERSIAN Zahedan Cohort Study	Community	Urban	35-70	35-70	3890	6013	contact
IRN_2018_Ardabil	Iran	2016-2019	The PERSIAN Ardabil Cohort Study	Community	Both	35-70	35-70	6658	7931	contact
IRN_2018_easterniran	Iran	2018-2019	Prevalence of risk factors for cardiovascular disease among a rural population in eastern Iran	Subnational	Rural	18+	18+	148	146	contact
IRN_2018_Kavar	Iran	2017-2018	The PERSIAN Kavar Cohort Study	Community	Urban	35-70	35-70	2417	2539	contact
IRN_2018_Khoozestan	Iran	2016-2019	The Khuzestan comprehensive health study: A platform for NCDs, blood borne and mental diseases research	Subnational	Both	20-65	20-65	10846	19427	contact
IRN_2018_Mashhad	Iran	2017-2019	The PERSIAN Mashhad Cohort Study	Community	Both	35-70	35-70	2276	2619	contact
IRN_2018_Nelsa	Iran	2017-2018	PERSIAN elderly component-Iranian Longitudinal Study on Ageing	Subnational	Both	50-95	50-95	3360	3857	contact
IRN_2018_Shahrekord	Iran	2016-2019	The PERSIAN Shahrekord Cohort Study	Community	Both	35-70	35-70	4222	4464	contact
IRQ_2015_STEPS	Iraq	2015	STEPS	National	Both	18+	18+	1589	2312	included in 'Survey data' tab
IRQ_2006_STEPS	Iraq	2006	STEPS	National	Both	25-64	25-64	2251	2252	contact
IRL_1998_SLAN	Ireland	1998	Survey of Lifestyle, Attitudes and Nutritional in Ireland 1998	National	Both	18+	18+	123	296	included in 'Survey data' tab
IRL_2002_SLAN	Ireland	2002	Survey of Lifestyle, Attitudes and Nutritional in Ireland 2002	National	Both	18+	18+	164	216	included in 'Survey data' tab
IRL_2007_SLAN	Ireland	2006-2007	Survey of Lifestyle, Attitudes and Nutritional in Ireland 2006-2007	National	Both	18+	18+	945	1225	included in 'Survey data' tab
IRL_2010_TILDA	Ireland	2009-2011	The Irish Longitudinal Study on Ageing	National	Both	50+	50+	2693	3170	included in 'Survey data' tab
IRL_1998_NSIFCS	Ireland	1997-1999	North/South Ireland Food Consumption Survey	National	Both	18-64	18-64	613	698	contact
IRL_2009_NANS	Ireland	2008-2010	National Adult Nutrition Survey	National	Both	18+	18+	658	696	contact
ISR_1986_MONICA-TELa	Israel	1985-1986	MONICA, Tel Aviv	Community	Urban	25-64	25-64	653	685	included in 'Survey data' tab
ISR_1991_JLCS	Israel	1990-1991	The Jerusalem Longitudinal Cohort Study	Community	Urban	69-70	69-70	245	199	contact
ISR_1998_JLCS	Israel	1997-1998	The Jerusalem Longitudinal Cohort Study	Community	Urban	76-77	76-77	422	429	contact
ISR_2000_MABAT	Israel	1999-2001	Mabat First Israeli National Health and Nutrition Survey	National	Both	25-64	25-64	1371	1410	contact
ISR_2002_GOH	Israel	1999-2005	The Israel Glucose Intolerance, Obesity and Hypertension Study	National	Urban	58+	58+	514	527	contact
ISR_2005_HDS	Israel	2002-2007	Hadera District Study	Subnational	Urban	25-78	25-78	548	538	contact
ISR_2006_ZAHAV	Israel	2005-2006	Mabat Zahav First National Health and Nutrition Survey in ages 65 and over	National	Urban	65+	65+	743	819	contact
ISR_2015_MABAT	Israel	2014-2016	Mabat Second Israeli National Health and Nutrition Survey	National	Both	18-64	18-64	1061	1073	contact
ISR_2015_ZAHAV	Israel	2014-2015	Mabat Zahav Second National Health and Nutrition Survey ages in 65 and over	National	Both	65+	65+	307	318	contact
ITA_1985_INTERSALT-Naples	Italy	1985	INTERSALT, Naples	Community	Urban	20-59	20-59	100	100	included in 'Survey data' tab
ITA_1986_INTERSALT-Bassiano	Italy	1986	INTERSALT, Bassiano	Community	Urban	20-59	20-59	99	100	included in 'Survey data' tab
ITA_1986_INTERSALT-Gubbio	Italy	1986	INTERSALT, Gubbio	Community	Urban	20-59	20-59	99	100	included in 'Survey data' tab
ITA_1986_INTERSALT-Mirano	Italy	1986	INTERSALT, Mirano	Community	Urban	20-59	20-59	100	100	included in 'Survey data' tab
ITA_1986_MONICA-FRIa	Italy	1986	MONICA, Friuli	Subnational	Urban	25-64	25-64	921	918	included in 'Survey data' tab
ITA_1987_MONICAbrianza	Italy	1986-1987	MONICA, Brianza	Subnational	Urban	25-64	25-64	814	832	included in 'Survey data' tab
ITA_1989_MONICA-FRIa	Italy	1989	MONICA, Friuli	Subnational	Urban	25-64	25-64	902	900	included in 'Survey data' tab
ITA_1990_MONICAbrianza	Italy	1989-1990	MONICA, Brianza	Subnational	Urban	25-64	25-64	787	786	included in 'Survey data' tab
ITA_1994_MONICA-FRIa	Italy	1994	MONICA, Friuli	Subnational	Urban	25-64	25-64	882	888	included in 'Survey data' tab
ITA_1994_MONICAbrianza	Italy	1993-1994	MONICA, Brianza	Subnational	Urban	25-64	25-64	801	856	included in 'Survey data' tab
ITA_1985_FINE	Italy	1985	Finland, Italy, Netherlands, Elderly (Fine-Italy)	Community	Rural	65-84		650		contact
ITA_1987_MATISS	Italy	1986-1987	Malattie cardiovascolari ATerosclerotiche Istituto Superiore di Sanità (MATISS)	Community	Rural	19-72	19-72	1273	1568	contact
ITA_1987_PISA	Italy	1985-1988	Pisa Epidemiological Study - first survey	Community	Urban	5-90	5-90	1834	2019	contact
ITA_1989_VHS	Italy	1989	Ventimiglia Heart Study	Community	Rural	6+	6+	602	709	contact
ITA_1990_BRUNECKstudy	Italy	1990	Bruneck Study	Community	Rural	40-79	40-79	469	450	contact
ITA_1990_PoDelta	Italy	1988-1991	Po river delta Epidemiological Study - second survey	Community	Rural	8-73	8-73	1341	1497	contact
ITA_1992_PISA	Italy	1991-1993	Pisa Epidemiological Study - second survey	Community	Urban	8-97	8-97	1288	1553	contact
ITA_1993_ILSA	Italy	1992-1993	Italian Longitudinal Study on Aging	National	Both	65-84	65-84	1666	1455	contact
ITA_1994_MATISS	Italy	1993-1996	Malattie cardiovascolari ATerosclerotiche Istituto Superiore di Sanità (MATISS)	Community	Rural	20-77	20-77	965	999	contact
ITA_1995_10380344	Italy	1992-1998	Vobarno Study	Community	Both	25-64	35-64	265	309	contact
ITA_1995_BRUNECKstudy	Italy	1995	Bruneck Study	Community	Rural	45-84	45-84	411	408	contact
ITA_1996_EPICflorence	Italy	1993-1998	EPIC Florence	Community	Urban	24-72	24-72	3498	9968	contact
ITA_1996_Friuli	Italy	1995-1996	Friuli Studio Emostatico	Community	Urban	45-64	45-64	198	198	contact
ITA_1996_ILSA	Italy	1995-1996	Italian Longitudinal Study on Aging	National	Both	68-90	68-90	1011	808	contact
ITA_1997_PROVA	Italy	1995-1999	PROgetto Veneto Anziani (PROVA)	Subnational	Both	65+	65+	1187	1722	contact
ITA_1998_10380456	Italy	1997-1999	Lucca CUORE Study	Community	Urban	15-84	15-84	897	1123	contact
ITA_1999_10380346	Italy	1998-2000	InCHIANTI study	Community	Both	15+	15+	560	681	contact
ITA_1999_VIP	Italy	1998-1999	Progetto VIP	Community	Both	25-74	25-74	599	600	contact
ITA_2000_BRUNECKstudy	Italy	2000	Bruneck Study	Community	Rural	50-89	50-89	331	361	contact
ITA_2000_OEC	Italy	1998-2002	Osservatorio Epidemiologico Cardiovascolare	National	Both	35-74	35-74	4870	4752	contact
ITA_2001_ILSA	Italy	2000-2001	Italian Longitudinal Study on Aging	National	Both	73-93	73-93	557	473	contact
ITA_2002_ASTI	Italy	2001-2003	The Study of Asti	Community	Both	45-64	45-64	780	878	contact
ITA_2002_PROVA	Italy	2000-2003	PROgetto Veneto Anziani (PROVA)	Subnational	Both	67+	67+	795	1331	contact
ITA_2003_EMAS	Italy	2003	The European Male Ageing Study	Community	Both	40+		433		contact
ITA_2004_PROVA	Italy	2002-2005	PROgetto Veneto Anziani (PROVA)	Subnational	Both	68+	68+	621	1138	contact
ITA_2005_BRUNECKstudy	Italy	2005	Bruneck Study	Community	Rural	55-93	55-93	264	307	contact
ITA_2005_IPREA	Italy	2004-2005	Italian Project on the Epidemiology of Alzheimer's Disease	National	Both	65-84	65-84	1569	1421	contact
ITA_2005_Vobarno	Italy	2004-2005	Vobarno study	Community	Rural	55-74	55-74	99	113	contact
ITA_2006_CLP	Italy	2004-2008	Cardiolab project	National	Urban	40+	40+	19152	14782	contact
ITA_2006_MOLIF	Italy	2005-2007	Moli-family Study	Subnational	Both	14+	14+	243	301	contact
ITA_2008_EMAS	Italy	2008	The European Male Ageing Study	Community	Both	40+		346		contact
ITA_2008_Moli	Italy	2005-2010	Moli-sani Study	Subnational	Both	35+	35+	11694	12614	contact
ITA_2009_VIP	Italy	2008-2009	Progetto VIP	Community	Both	25-74	25-74	597	598	contact
ITA_2010_BRUNECKstudy	Italy	2010	Bruneck Study	Community	Rural	60-98	60-98	225	259	contact
ITA_2010_citGrosso	Italy	2009-2010	Grosso et al., J Epidemiol 24(4):327-33, 2014	Community	Both	19+	19+	760	1129	contact
ITA_2010_OEC	Italy	2008-2012	Osservatorio Epidemiologico Cardiovascolare/Health Examination Survey	National	Both	35-80	35-80	4368	4332	contact
ITA_2010_PISA	Italy	2009-2011	Pisa Epidemiological Study - third survey (Pisa 3 study)	Community	Urban	6+	6+	496	574	contact
ITA_2011_CAMELIA	Italy	2010-2012	CArdiovascular risk MEtabolic syndrome LIver and Autoimmunity diseases (CA.ME.LI.A)	Community	Both	18-75	18-75	477	515	contact
ITA_2012_Vobarno	Italy	2011-2012	Vobarno study	Community	Rural	49-62	49-62	107	143	contact
ITA_2015_BRUNECKstudy	Italy	2015	Bruneck Study	Community	Rural	65-98	65-98	171	169	contact
ITA_2015_MEAL	Italy	2014-2016	Mediterranean healthy Eating, Aging and Lifestyles (MEAL) study	Subnational	Urban	20+	20+	762	762	contact
ITA_2018_VIP	Italy	2018-2019	Progetto VIP	Community	Both	25-74	25-74	600	598	contact
JAM_1993_7388023	Jamaica	1993	Zohoori et al., West Indian Med J 52(2):111-17, 2003	Community	Urban	25-74	25-74	845	1245	contact
JAM_1995_7388002	Jamaica	1994-1995	Cooper et al., Am J Public Health 87(2):160-68, 1997	Community	Urban	25-100	25-100	597	833	contact
JAM_1998_OCJE	Jamaica	1998	Ragoobirsingh et al., Diabetes Obes Metab 6(1):23–27, 2004	National	Both	15+	15+	552	945	contact
JAM_2001_JHLS	Jamaica	2000-2001	Jamaica Health and Lifestyle Survey	National	Both	15-74	15-74	653	1281	contact
JAM_2008_JHLS	Jamaica	2007-2008	Jamaica Health and Lifestyle Survey	National	Both	15-74	15-74	862	1904	contact
JAM_2012_OPJ	Jamaica	2012	Older Persons in Jamaica 2012	National	Both	60+	60+	158	205	contact
JPN_1985_INTERSALT-Osaka	Japan	1985	INTERSALT, Osaka	Community	Urban	20-59	20-59	100	97	included in 'Survey data' tab
JPN_1985_INTERSALT-Tochigi	Japan	1985	INTERSALT, Tochigi	Community	Urban	20-59	20-59	95	99	included in 'Survey data' tab
JPN_1985_INTERSALT-Toyama	Japan	1985	INTERSALT, Toyama	Community	Urban	20-59	20-59	100	100	included in 'Survey data' tab
JPN_1997_INTERMAP-AitoTown	Japan	1996-1997	INTERMAP, Aito Town	Community	Rural	40-59	40-59	130	129	included in 'Survey data' tab
JPN_1998_INTERMAP-Sapporo	Japan	1997-1998	INTERMAP, Sapporo	Community	Urban	40-59	40-59	149	148	included in 'Survey data' tab
JPN_1998_INTERMAP-Toyama	Japan	1997-1998	INTERMAP, Toyama	Community	Urban	40-59	40-59	149	150	included in 'Survey data' tab
JPN_1998_INTERMAP-Wakayama	Japan	1997-1998	INTERMAP, Wakayama	Community	Urban	40-59	40-59	146	144	included in 'Survey data' tab
JPN_1985_NNS	Japan	1985	National Nutrition Survey	National	Both	5+	5+	7461	8865	contact
JPN_1986_APCSC-Akabane	Japan	1985-1986	Akabane Study	Community	Urban	40-69	40-69	812	1022	contact
JPN_1986_NNS	Japan	1986	National Nutrition Survey	National	Both	5+	5+	7280	8635	contact
JPN_1987_APCSC-Konan	Japan	1987	Konan Town Study	Community	Rural	20-79	20-79	70	88	contact
JPN_1987_NNS	Japan	1987	National Nutrition Survey	National	Both	5+	5+	6427	8160	contact
JPN_1988_APCSC-Konan	Japan	1988	Konan Town Study	Community	Rural	20-79	20-79	76	85	contact
JPN_1988_NNS	Japan	1988	National Nutrition Survey	National	Both	5+	5+	6885	8045	contact
JPN_1989_1392901	Japan	1989	Aito Town Study	Community	Rural	5-74	5-84	529	525	contact
JPN_1989_APCSC-Konan	Japan	1989	Konan Town Study	Community	Rural	20-79	20-79	58	63	contact
JPN_1989_NNS	Japan	1989	National Nutrition Survey	National	Both	5+	5+	5767	6882	contact
JPN_1990_APCSC-Konan	Japan	1990	Konan Town Study	Community	Rural	20-79	20-79	27	51	contact
JPN_1990_NNS	Japan	1990	National Nutrition Survey and National Cardiovascular Survey	National	Both	5+	5+	6080	7291	contact
JPN_1991_APCSC-Konan	Japan	1991	Konan Town Study	Community	Rural	20-79	20-79	93	116	contact
JPN_1991_APCSC-Shigaraki	Japan	1991	Shigaraki Town Study	Community	Rural	30-89	30-89	230	319	contact
JPN_1991_NNS	Japan	1991	National Nutrition Survey	National	Both	5+	5+	6036	7098	contact
JPN_1992_APCSC-Konan	Japan	1992	Konan Town Study	Community	Rural	20-79	20-79	45	47	contact
JPN_1992_APCSC-Shigaraki	Japan	1992	Shigaraki Town Study	Community	Rural	30-89	30-89	288	385	contact
JPN_1992_JPHC1	Japan	1990-1994	Japan Public Health Center-based prospective Study (JPHC Study), Cohort I	Subnational	Both	40-59	40-59	8749	14481	contact
JPN_1992_NNS	Japan	1992	National Nutrition Survey	National	Both	5+	5+	5635	6656	contact
JPN_1993_APCSC-Konan	Japan	1993	Konan Town Study	Community	Rural	20-79	20-79	54	65	contact
JPN_1993_APCSC-Shigaraki	Japan	1993	Shigaraki Town Study	Community	Rural	30-89	30-89	301	452	contact
JPN_1993_NNS	Japan	1993	National Nutrition Survey	National	Both	5+	5+	5708	6740	contact
JPN_1994_1392059	Japan	1994	Japanese Population-Based Osteoporosis Study	Subnational	Both		15-79		3222	contact
JPN_1994_APCSC-Konan	Japan	1994	Konan Town Study	Community	Rural	20-79	20-79	43	59	contact
JPN_1994_APCSC-Shigaraki	Japan	1994	Shigaraki Town Study	Community	Rural	30-89	30-89	251	336	contact
JPN_1994_JPHC2	Japan	1993-1994	Japan Public Health Center-based prospective Study (JPHC Study), Cohort II	Subnational	Both	40-69	40-69	8534	16190	contact
JPN_1994_NNS	Japan	1994	National Nutrition Survey	National	Both	5+	5+	5439	6386	contact
JPN_1995_APCSC-Konan	Japan	1995	Konan Town Study	Community	Rural	20-79	20-79	45	61	contact
JPN_1995_APCSC-Shigaraki	Japan	1995	Shigaraki Town Study	Community	Rural	30-89	30-89	300	470	contact
JPN_1995_NNS	Japan	1995	National Nutrition Survey	National	Both	5+	5+	5480	6365	contact
JPN_1996_APCSC-Shigaraki	Japan	1996	Shigaraki Town Study	Community	Rural	30-89	30-89	86	152	contact
JPN_1996_NNS	Japan	1996	National Nutrition Survey	National	Both	5+	5+	5277	6185	contact
JPN_1997_APCSC-Shigaraki	Japan	1997	Shigaraki Town Study	Community	Rural	30-89	30-89	61	100	contact
JPN_1997_NNS	Japan	1997	National Nutrition Survey	National	Both	5+	5+	5104	6068	contact
JPN_1998_Niigata	Japan	1998	Niigata Study	Community	Urban	70	70	287	284	contact
JPN_1998_NNS	Japan	1998	National Nutrition Survey	National	Both	5+	5+	5381	6249	contact
JPN_1999_1392060	Japan	1997-2000	Sudo et al., J Orthop Sci 13(5):413-18, 2008	Community	Rural	55+	45+	261	785	contact
JPN_1999_Niigata	Japan	1999	Niigata Study	Community	Urban	71	71	245	216	contact
JPN_1999_NNS	Japan	1999	National Nutrition Survey	National	Both	5+	5+	4367	5333	contact
JPN_2000_Niigata	Japan	2000	Niigata Study	Community	Urban	72	72	233	202	contact
JPN_2000_NNS	Japan	2000	National Nutrition Survey and National Cardiovascular Survey	National	Both	5+	5+	4665	5430	contact
JPN_2001_JAHSD	Japan	2001	The Japan Association of Health Service Database	Subnational	Both	20+	20+	1471868	1231378	contact
JPN_2001_Niigata	Japan	2001	Niigata Study	Community	Urban	73	73	235	201	contact
JPN_2001_NNS	Japan	2001	National Nutrition Survey	National	Both	5+	5+	4527	5448	contact
JPN_2002_Niigata	Japan	2002	Niigata Study	Community	Urban	74	74	228	202	contact
JPN_2002_NNS	Japan	2002	National Nutrition Survey	National	Both	5+	5+	4104	4941	contact
JPN_2003_HiS	Japan	2002-2003	The Hisayama Study	Community	Rural	40+	40+	1414	1884	contact
JPN_2003_NHNS	Japan	2003	National Health and Nutrition Survey	National	Both	5+	5+	4035	4920	contact
JPN_2003_Niigata	Japan	2003	Niigata Study	Community	Urban	75	75	215	189	contact
JPN_2004_NHNS	Japan	2004	National Health and Nutrition Survey	National	Both	5+	5+	3384	3952	contact
JPN_2004_Niigata	Japan	2004	Niigata Study	Community	Urban	76	76	215	185	contact
JPN_2005_NHNS	Japan	2005	National Health and Nutrition Survey	National	Both	5+	5+	3154	3802	contact
JPN_2005_Niigata	Japan	2005	Niigata Study	Community	Urban	77	77	203	184	contact
JPN_2006_NHNS	Japan	2006	National Health and Nutrition Survey	National	Both	5+	5+	3522	4165	contact
JPN_2006_Niigata	Japan	2006	Niigata Study	Community	Urban	78	78	199	194	contact
JPN_2007_NHNS	Japan	2007	National Health and Nutrition Survey	National	Both	5+	5+	3520	4154	contact
JPN_2007_Niigata	Japan	2007	Niigata Study	Community	Urban	79	79	183	192	contact
JPN_2008_1392061	Japan	2008	Resident in Kanazawa City (age 40+)	Community	Urban	40+	40+	6562	11944	contact
JPN_2008_NHNS	Japan	2008	National Health and Nutrition Survey	National	Both	5+	5+	3518	4190	contact
JPN_2009_NHNS	Japan	2009	National Health and Nutrition Survey	National	Both	5+	5+	3486	4197	contact
JPN_2010_NHNS	Japan	2010	National Health and Nutrition Survey	National	Both	5+	5+	3218	3822	contact
JPN_2011_NHNS	Japan	2011	National Health and Nutrition Survey	National	Both	5+	5+	3020	3586	contact
JPN_2011_THSAD	Japan	2011	The Tokyo Health Service Association Database	Community	Urban	20+	20+	82453	54028	contact
JPN_2012_NHNS	Japan	2012	National Health and Nutrition Survey	National	Both	5+	5+	11298	13674	contact
JPN_2013_NHNS	Japan	2013	National Health and Nutrition Survey	National	Both	5+	5+	3198	3637	contact
JPN_2014_Nagahama	Japan	2012-2016	The Nagahama study	Community	Rural	35-80	35-80	3206	6620	contact
JPN_2014_NHNS	Japan	2014	National Health and Nutrition Survey	National	Both	5+	5+	3208	3657	contact
JPN_2014_NHS	Japan	2014-2015	Nagaoka Health Screening	Community	Both	20-89	20-89	4938	4298	contact
JPN_2015_NHNS	Japan	2015	National Health and Nutrition Survey	National	Both	5+	5+	2914	3457	contact
JPN_2016_NHNS	Japan	2016	National Health and Nutrition Survey	National	Both	5+	5+	9814	11638	contact
JPN_2017_NHNS	Japan	2017	National Health and Nutrition Survey	National	Both	5+	5+	2662	3057	contact
JPN_2017_THSAD	Japan	2017	The Tokyo Health Service Association Database	Community	Urban	20+	20+	63713	47577	contact
JOR_1997_DHS	Jordan	1997	DHS	National	Both		20-49		3002	included in 'Survey data' tab
JOR_2002_DHS	Jordan	2002	DHS	National	Both		20-49		4839	included in 'Survey data' tab
JOR_2007_DHS	Jordan	2007	DHS	National	Both		20-49		4451	included in 'Survey data' tab
JOR_2009_DHS	Jordan	2009	DHS	National	Both		20-49		4054	included in 'Survey data' tab
JOR_2012_DHS	Jordan	2012	DHS	National	Both		20-49		6357	included in 'Survey data' tab
JOR_2018_DHS	Jordan	2017-2018	DHS	National	Both		15-49		6261	included in 'Survey data' tab
JOR_2019_STEPS	Jordan	2019	STEPS	National	Both	18-69	18-69	2009	3084	included in 'Survey data' tab
JOR_1995_15400012	Jordan	1994-1996	Ajlouni, Int J Obes Relat Metab Disord 22(7), 1998	Subnational	Both	25+	25+	1047	1787	contact
JOR_2004_15400102	Jordan	2004	Khader et al., Metab Syndr Relat Disord 6(2):113-20, 2008	Community	Both	25+	25-59	394	548	contact
JOR_2004_BRFSS	Jordan	2004	Behavioural Risk Factor Surveillence Survey	National	Rural	18+	18+	236	473	contact
JOR_2007_BRFSS	Jordan	2007	Behavioural Risk Factor Surveillence Survey	National	Both	18+	18+	332	433	contact
JOR_2009_MAVDS	Jordan	2009	Metablic abnomalities and vitamin D study	National	Both	7+	7+	1601	3863	contact
JOR_2016_NCDDS	Jordan	2016-2017	National Cardiovascular Diseases and Diabetes Study (NCDDS)	National	Both	18+	18+	1187	2745	contact
KAZ_1995_DHS	Kazakhstan	1995	DHS	National	Both		15-49		3542	included in 'Survey data' tab
KAZ_1999_DHS	Kazakhstan	1999	DHS	National	Both		15-49		2227	included in 'Survey data' tab
KAZ_1985_2398006	Kazakhstan	1985	Balakhmetova et l., Ter Arkh 63(1):17-20, 1991	Community	Urban	20-54		2886		contact
KAZ_2015_Almaty	Kazakhstan	2015	Almaty STEPS	Subnational	Both	18-69	18-69	385	1145	contact
KAZ_2015_Shymkent	Kazakhstan	2015	Shymkent STEPS	Subnational	Both	18-69	18-69	400	808	contact
KAZ_2016_Aktobe	Kazakhstan	2015-2016	Aktobe STEPS	Subnational	Both	18-69	18-69	348	1153	contact
KAZ_2019_Karaganda	Kazakhstan	2019	A health status assessment of a population of Karaganda urban region	Community	Urban	18+	18+	324	670	contact
KEN_1985_INTERSALT	Kenya	1985	INTERSALT	Community	Rural	20-59	20-59	90	86	included in 'Survey data' tab
KEN_1993_DHS	Kenya	1993	DHS	National	Both		20-49		3113	included in 'Survey data' tab
KEN_1998_DHS	Kenya	1998	DHS	National	Both		20-49		3009	included in 'Survey data' tab
KEN_2003_DHS	Kenya	2003	DHS	National	Both		15-49		7189	included in 'Survey data' tab
KEN_2009_DHS	Kenya	2008-2009	DHS	National	Both		15-49		7827	included in 'Survey data' tab
KEN_2014_DHS	Kenya	2014	DHS	National	Both		15-49		13469	included in 'Survey data' tab
KEN_2015_STEPS	Kenya	2015	STEPS	National	Both	18-69	18-69	1751	2514	included in 'Survey data' tab
KEN_2018_viwandani	Kenya	2018	Assessing the gaps in healthcare and determining the feasibility for the setup of a social enterprise - Viwandani Lown Community Health Center, Kenya	Community	Urban	19-73	19-73	153	143	contact
KIR_2004_STEPS	Kiribati	2004	STEPS	National	Both	15-64	15-64	779	939	included in 'Survey data' tab
KIR_2016_STEPS	Kiribati	2015-2016	STEPS	National	Both	18-69	18-69	557	694	included in 'Survey data' tab
KWT_2006_STEPS	Kuwait	2006	STEPS	National	Both	20-64	20-64	918	1298	included in 'Survey data' tab
KWT_2014_STEPS	Kuwait	2014	STEPS	National	Both	18-69	18-69	1382	2212	included in 'Survey data' tab
KWT_1994_15414098	Kuwait	1993-1994	al-Isa, Ann Nutr Metab 41(5):307-14, 1997	Community	Both	18+		1730		contact
KWT_1996_NIDDMK	Kuwait	1995-1996	Abdella et al., Diabetes Res and Clin Pract 42(3):187–196, 1998	Subnational	Both	20-84	20-84	1099	1892	contact
KWT_1998_ COZINC	Kuwait	1998	Abiaka et al., , Biol Trace Elem Res 91(1):33-43, 2003	National	Both	15-80	15-80	178	233	contact
KWT_2009_NNSSK	Kuwait	2008-2009	National Nutrition Program for the State of Kuwait	National	Urban	5+	5+	772	830	contact
KWT_2009_WHS	Kuwait	2008-2010	Gulf Cooperation Council World Health Survey	National	Both	18+	18+	1598	1782	contact
KWT_2013_KDEP	Kuwait	2011-2014	Kuwait Diabetes Epidemiology Program	National	Urban	18-82	18-82	3007	2242	contact
KGZ_1997_DHS	Kyrgyzstan	1997	DHS	National	Both		15-49		3570	included in 'Survey data' tab
KGZ_2012_DHS	Kyrgyzstan	2012	DHS	National	Both		15-49		7516	included in 'Survey data' tab
KGZ_2013_STEPS	Kyrgyzstan	2013	STEPS	National	Both	25-64	25-64	942	1600	included in 'Survey data' tab
KGZ_1993_KMPS	Kyrgyzstan	1993	KyrgyzstanMultipurpose Poverty Surveys	National	Both	18-60	18-60	2457	2457	contact
LAO_2006_MICS3	Lao PDR	2006	Multiple Indicator Cluster Survey 3	National	Both		15-49		807	included in 'Survey data' tab
LAO_2008_STEPS	Lao PDR	2008	STEPS	Community	Both	25-64	25-64	1568	2353	included in 'Survey data' tab
LAO_2013_STEPS	Lao PDR	2013	STEPS	National	Both	18-64	18-64	984	1461	included in 'Survey data' tab
LVA_1997_Healthsurvey	Latvia	1997	Nutrition and lifestyle in the baltic republics, WHO, 1997	National	Both	19-50	19-50	703	732	contact
LVA_2009_CRFS	Latvia	2008-2009	Cardiovascular risk factor study	National	Both	25-74	25-74	1362	2398	contact
LBN_2017_STEPS	Lebanon	2017	STEPS	National	Both	18-69	18-69	729	983	included in 'Survey data' tab
LBN_1997_PHS	Lebanon	1997	Obesity in Lebanon: National Survey	National	Both	5+	5+	871	1164	contact
LBN_2009_STEPS	Lebanon	2008-2009	STEPS	National	Both	5+	5+	1721	1886	contact
LSO_2005_DHS	Lesotho	2004-2005	DHS	National	Both		15-49		3206	included in 'Survey data' tab
LSO_2010_DHS	Lesotho	2009-2010	DHS	National	Both	15-59	15-49	3216	3781	included in 'Survey data' tab
LSO_2012_STEPS	Lesotho	2012	STEPS	National	Both	25-64	25-64	726	1442	included in 'Survey data' tab
LSO_2014_DHS	Lesotho	2014	DHS	National	Both	15-59	15-49	2860	3244	included in 'Survey data' tab
LSO_1993_NSIVA	Lesotho	1993	National survey on iodine, vitamin A and iron status of women and children in Lesotho	National	Both		20-65		792	contact
LBR_2007_DHS	Liberia	2006-2007	DHS	National	Both		15-49		6419	included in 'Survey data' tab
LBR_2011_STEPS	Liberia	2011	STEPS	National	Both	25-64	25-64	998	1254	included in 'Survey data' tab
LBR_2013_DHS	Liberia	2013	DHS	National	Both	15-49	15-49	4235	4718	included in 'Survey data' tab
LBY_2009_STEPS	Libya	2009	STEPS	National	Both	25-64	25-64	1678	1564	included in 'Survey data' tab
LBY_1999_15434115	Libya	1998-1999	Kadiki et al., Diabetes Metab 27(6):647-54, 2001	Community	Both	15+	15+	228	398	contact
LTU_1987_MONICA-KAUa	Lithuania	1986-1987	MONICA, Kaunas	Community	Urban	35-64	35-64	894	868	included in 'Survey data' tab
LTU_1992_MONICA-KAUa	Lithuania	1992-1993	MONICA, Kaunas	Community	Urban	35-64	35-64	610	621	included in 'Survey data' tab
LTU_1987_CINDI	Lithuania	1987	Countrywide Integrated Noncommunicable Diseases Intervention Programme	Subnational	Rural	25-64	25-64	1220	1434	contact
LTU_1993_CINDI	Lithuania	1992-1993	Countrywide Integrated Noncommunicable Diseases Intervention Programme	Subnational	Rural	25-64	25-64	617	798	contact
LTU_1997_9440012	Lithuania	1997	Pomerleau, 2000	National	Both	19+	19+	966	1130	contact
LTU_1999_CINDI	Lithuania	1998-1999	Countrywide Integrated Noncommunicable Diseases Intervention Programme	Subnational	Rural	25-64	25-64	816	1021	contact
LTU_2002_citPomerleau	Lithuania	2002	Pomerleau et al., Public Health Nutrition 3: 3-10, 2000	National	Both	24-70	24-70	977	928	contact
LTU_2002_MONICA4	Lithuania	2001-2002	MONICA4	Community	Urban	35-64	35-64	625	776	contact
LTU_2007_CINDI	Lithuania	2006-2007	Countrywide Integrated Noncommunicable Diseases Intervention Programme	Subnational	Rural	25-64	25-64	718	972	contact
LTU_2007_HAPIEE	Lithuania	2006-2008	Health, Alcohol and Psychosocial Factors In Eastern Europe	Community	Urban	45-75	45-75	3231	3874	contact
LUX_2008_ORISCAV	Luxembourg	2007-2009	Observation of cardiovascular risk factors in Luxembourg (ORISCAV-LUX)	National	Both	18-69	18-69	696	735	contact
LUX_2014_EHES	Luxembourg	2013-2015	European Health Examination Survey	National	Both	25-64	25-64	721	785	contact
LUX_2017_ORISCAV	Luxembourg	2016-2018	Observation of cardiovascular risk factors in Luxembourg (ORISCAV-LUX2)	National	Both	25-79	25-79	670	763	contact
MKD_1999_MICS	Macedonia (TFYR)	1999	Multiple Indicator Cluster Survey	National	Both		15-45		1038	contact
MDG_1997_DHS	Madagascar	1997	DHS	National	Both		20-49		2253	included in 'Survey data' tab
MDG_2004_DHS	Madagascar	2003-2004	DHS	National	Both		15-49		7155	included in 'Survey data' tab
MDG_2005_STEPS	Madagascar	2005	STEPS	Subnational	Both	25-64	25-64	2596	2494	included in 'Survey data' tab
MDG_2009_DHS	Madagascar	2008-2009	DHS	National	Both		15-49		7869	included in 'Survey data' tab
MDG_1997_19450001	Madagascar	1997	Mauny et al., Ann Trop Med Parasitol 97(6):645-54, 2003	Community	Both	15+	15+	248	283	contact
MWI_1992_DHS	Malawi	1992	DHS	National	Both		20-49		2102	included in 'Survey data' tab
MWI_2000_DHS	Malawi	2000	DHS	National	Both		15-49		11491	included in 'Survey data' tab
MWI_2004_DHS	Malawi	2004	DHS	National	Both		15-49		9751	included in 'Survey data' tab
MWI_2009_STEPS	Malawi	2009	STEPS	National	Both	25-64	25-64	1666	3189	included in 'Survey data' tab
MWI_2010_DHS	Malawi	2010	DHS	National	Both		15-49		7118	included in 'Survey data' tab
MWI_2016_DHS	Malawi	2015-2016	DHS	National	Both		15-49		7415	included in 'Survey data' tab
MWI_2017_STEPS	Malawi	2017	STEPS	National	Both	18-69	18-69	1478	2534	included in 'Survey data' tab
MWI_1996_19454013	Malawi	1996	Chilima et al., Eur J Clin Nutr 52(9):643-9	Community	Rural	55-94	55-94	86	185	contact
MWI_2015_NCDSrural	Malawi	2013-2017	NCD Survey Malawi Epidemiology and Intervention Research Unit	Community	Rural	18+	18+	5849	7507	contact
MWI_2015_NCDSurban	Malawi	2013-2017	NCD Survey Malawi Epidemiology and Intervention Research Unit	Community	Urban	18+	18+	5802	10291	contact
MYS_1996_NHMS	Malaysia	1996	National Health and Morbidity Survey (NHMS)	National	Both	18+	18+	14520	16244	contact
MYS_2003_MANS	Malaysia	2002-2003	Malaysian Adult Nutrition Survey	National	Both	18-59	18-59	1286	966	contact
MYS_2004_citRampal	Malaysia	2004	Rampal et al., Public Health 2008; 122: 11-8	National	Both	15+	15+	6834	9293	contact
MYS_2005_STEPS	Malaysia	2005	STEPS	National	Both	25-64	25-64	1286	1286	contact
MYS_2006_NHMS	Malaysia	2006	National Health and Morbidity Survey (NHMS)	National	Both	5+	5+	22970	25508	contact
MYS_2008_MSSMrural	Malaysia	2008	Metabolic Syndrome Study in Malaysia	National	Rural	18+	18+	753	1368	contact
MYS_2008_MSSMurban	Malaysia	2008	Metabolic Syndrome Study in Malaysia	National	Urban	18+	18+	769	1446	contact
MYS_2011_NHMS	Malaysia	2011	National Health and Morbidity Survey (NHMS)	National	Both	5+	5+	8033	8780	contact
MYS_2014_MANS	Malaysia	2014	Malaysian Adult Nutrition Survey	National	Both	18-59	18-59	1328	1495	contact
MYS_2015_NHMS	Malaysia	2015	National Health and Morbidity Survey (NHMS)	National	Both	18+	18+	8916	9581	contact
MDV_2009_DHS	Maldives	2009	DHS	National	Both		20-49		5139	included in 'Survey data' tab
MDV_2011_STEPS	Maldives	2011	STEPS	Subnational	Urban	15-64	15-64	660	1060	included in 'Survey data' tab
MDV_2017_DHS	Maldives	2016-2017	DHS	National	Both	15-49	15-49	3831	6839	included in 'Survey data' tab
MDV_2001_MICS	Maldives	2001	Multiple Indicator Cluster Survey	National	Both		15-50		1145	contact
MDV_2004_STEPS	Maldives	2004	STEPS	Subnational	Urban	25-64	25-64	933	1086	contact
MLI_1996_DHS	Mali	1995-1996	DHS	National	Both		20-49		3789	included in 'Survey data' tab
MLI_2001_DHS	Mali	2001	DHS	National	Both		15-49		10526	included in 'Survey data' tab
MLI_2006_DHS	Mali	2006	DHS	National	Both		15-49		12512	included in 'Survey data' tab
MLI_2007_STEPS	Mali	2007	STEPS	Subnational	Both	15-64	15-64	1036	1494	included in 'Survey data' tab
MLI_2013_DHS	Mali	2012-2013	DHS	National	Both		15-49		4646	included in 'Survey data' tab
MLI_2018_DHS	Mali	2018	DHS	National	Both		15-49		4576	included in 'Survey data' tab
MLI_1997_21466040	Mali	1997	Torheim et al., Eur J Clin Nutr 58(4):594-604, 2004	Subnational	Rural	15-44	15-44	237	337	contact
MLI_1997_PIDEB	Mali	1997	Programme Intégré de Développement de Bafoulabé	Community	Rural	15-45	15-45	425	716	contact
MLI_1999_21466019	Mali	1999	Torheim et al., Public Health Nutr 8(4):387-94, 2005	Subnational	Rural		15-44		191	contact
MLI_1999_BIS	Mali	1999-2000	Bafoulabe Iodine Study	Community	Rural		15-45		365	contact
MLI_2013_SNACK	Mali	2013	Santé Nutritionnelle à Assise Comunautaire dans la région de Kayes (SNACK)	Subnational	Rural		20-68		4595	contact
MLT_1986_INTERSALT	Malta	1986	INTERSALT	Community	Rural	20-59	20-59	100	100	included in 'Survey data' tab
MHL_2002_STEPS	Marshall Islands	2002	STEPS	National	Both	15-64	15-64	772	1195	included in 'Survey data' tab
MHL_2018_STEPS	Marshall Islands	2017-2018	STEPS	National	Both	18+	18+	1246	1392	included in 'Survey data' tab
MRT_2006_STEPS	Mauritania	2006	STEPS	Community	Urban	15-64	15-64	1132	1300	included in 'Survey data' tab
MRT_2001_DHS	Mauritania	2000-2001	DHS	National	Both		15-49		2635	contact
MUS_1987_MNCS	Mauritius	1987	Mauritius Noncommunicable Disease Survey	National	Both	25-74	25-74	2347	2653	contact
MUS_1992_MNCS	Mauritius	1992	Mauritius Noncommunicable Disease Survey	National	Both	25-74	25-74	2985	3477	contact
MUS_1998_MNCS	Mauritius	1998	Mauritius Noncommunicable Disease Survey	National	Both	25-74	25-74	2566	3248	contact
MUS_2009_MNCS	Mauritius	2009	Mauritius Noncommunicable Disease Survey	National	Both	19-74	19-74	2859	3391	contact
MEX_2000_SABE	Mexico	1999-2000	The Survey on Health, Well-Being, and Aging in Latin America and the Caribbean (SABE)	Community	Urban	60+	60+	359	548	included in 'Survey data' tab
MEX_2001_MHAS	Mexico	2001	The Mexican Health and Aging Study	National	Both	50+	50+	1030	1224	included in 'Survey data' tab
MEX_2002_ENNViH	Mexico	2002	Encuesta Nacional Sobre Niveles de vida de los Hogares	National	Both	5+	5+	11606	13614	included in 'Survey data' tab
MEX_2003_MHAS	Mexico	2003	The Mexican Health and Aging Study	National	Both	50+	50+	893	1162	included in 'Survey data' tab
MEX_2005_ENNViH	Mexico	2005	Encuesta Nacional Sobre Niveles de vida de los Hogares	National	Both	5+	5+	11696	13211	included in 'Survey data' tab
MEX_2010_SAGE	Mexico	2009-2010	SAGE	National	Both	50+	50+	796	1236	included in 'Survey data' tab
MEX_2011_ENNViH	Mexico	2009-2012	Encuesta Nacional Sobre Niveles de vida de los Hogares	National	Both	5+	5+	4908	4697	included in 'Survey data' tab
MEX_2012_ENSANUT	Mexico	2011-2012	Encuesta Nacional de Salud Y Nutricion	National	Both	5+	5+	31293	36834	included in 'Survey data' tab
MEX_2012_MHAS	Mexico	2012	The Mexican Health and Aging Study	National	Both	50+	50+	786	1106	included in 'Survey data' tab
MEX_2016_ENSANUT	Mexico	2016	Encuesta Nacional de Salud Y Nutricion	National	Both	5+	5+	5660	8429	included in 'Survey data' tab
MEX_1989_ENN	Mexico	1988-1989	Encuesta Nacional de Nutricion	National	Both		12-49		16617	contact
MEX_1991_MCDS	Mexico	1990-1992	Mexico City Diabetes Study	Community	Urban	30+	30+	941	1341	contact
MEX_1993_ENEC	Mexico	1992-1993	Encuesta Nacional de Enfermedades Cronicas	National	Urban	20-69	20-69	6040	8298	contact
MEX_1994_MCDS	Mexico	1993-1995	Mexico City Diabetes Study	Community	Urban	34+	34+	707	1033	contact
MEX_1996_12484004	Mexico	1996	Sanchez-Castillo et al., Eur J Clin Nutr 55(10):833-40, 2001	Community	Rural	18+	18+	104	149	contact
MEX_1999_ENN	Mexico	1998-1999	Encuesta Nacional de Nutricion	National	Both		12-49		17892	contact
MEX_1999_MCDS	Mexico	1997-1999	Mexico City Diabetes Study	Community	Urban	37+	37+	701	980	contact
MEX_2000_ENSA	Mexico	2000	Encuesta Nacional de Salud	National	Both	10+	10+	22554	39204	contact
MEX_2001_12484018	Mexico	1998-2004	Mexico City Prospective Study	Community	Urban	35-84	35-84	51768	105313	contact
MEX_2005_CARMELA	Mexico	2004-2005	Cardiovascular Risk factors Multiple Evaluation in Latin America	Community	Urban	25-64	25-64	833	894	contact
MEX_2006_ENSANUT	Mexico	2006	Encuesta Nacional de Salud y Nutrición	National	Both	5+	5+	27848	34909	contact
MEX_2006_PREVENIMSS	Mexico	2006	PREVENIMSS National Coverage Surveys	National	Urban	20+	20+	8715	11315	contact
MEX_2008_MCDS	Mexico	2007-2009	Mexico City Diabetes Study	Community	Urban	51+	51+	460	711	contact
MEX_2010_PREVENIMSS	Mexico	2010	PREVENIMSS National Coverage Surveys	National	Urban	20+	20+	6238	6003	contact
MEX_2019_ENSANUT	Mexico	2018-2019	Encuesta Nacional de Salud Y Nutricion	National	Both	5+	5+	4154	5835	contact
FSM_2002_STEPS_pohnpei	Micronesia (Federated States of)	2002	STEPS	Subnational	Both	25-64	25-64	591	893	included in 'Survey data' tab
FSM_2006_STEPS_chuuk	Micronesia (Federated States of)	2006	STEPS	Subnational	Both	15-64	15-64	918	1553	included in 'Survey data' tab
FSM_2008_STEPS_pohnpei	Micronesia (Federated States of)	2008	STEPS	Subnational	Both	25-64	25-64	875	1266	included in 'Survey data' tab
FSM_2009_STEPS_kosrae	Micronesia (Federated States of)	2009	STEPS, Kosrae	Subnational	Both	15-64	15-64	208	413	included in 'Survey data' tab
FSM_2009_STEPS_yap	Micronesia (Federated States of)	2009	STEPS, Yap	Subnational	Both	15-64	15-64	405	521	included in 'Survey data' tab
FSM_2016_STEPS	Micronesia (Federated States of)	2016	STEPS	Subnational	Both	18-69	18-69	516	818	included in 'Survey data' tab
MDA_2005_DHS	Moldova	2005	DHS	National	Both		15-49		7076	included in 'Survey data' tab
MDA_2013_STEPS	Moldova	2013	STEPS	National	Both	18-69	18-69	1712	2777	included in 'Survey data' tab
MNG_2005_STEPS	Mongolia	2005	STEPS	National	Both	15-64	15-64	1669	1717	included in 'Survey data' tab
MNG_2009_STEPS	Mongolia	2009	STEPS	National	Both	15-64	15-64	2197	3117	included in 'Survey data' tab
MNG_2013_STEPS	Mongolia	2013	STEPS	National	Both	15-64	15-64	2698	3167	included in 'Survey data' tab
MNG_2019_STEPS	Mongolia	2019	STEPS	National	Both	15-69	15-69	2926	3543	included in 'Survey data' tab
MNG_1999_NNS	Mongolia	1999	National Nutrition Survey	National	Both	35-65	35-65	907	1317	contact
MNG_2004_ NNS	Mongolia	2004	National Nutrition Survey	National	Both	15-74	15-74	248	360	contact
MNE_1985_recruit	Montenegro	1985	Anthropometric Characteristics of Montenegrin Recruiters from '70 and 80's	National	Both	17-28		9722		contact
MNE_1986_recruit	Montenegro	1986	Anthropometric Characteristics of Montenegrin Recruiters from '70 and 80's	National	Both	17-28		9961		contact
MNE_1987_recruit	Montenegro	1987	Anthropometric Characteristics of Montenegrin Recruiters from '70 and 80's	National	Both	17-28		10230		contact
MNE_2019_bodycomposition	Montenegro	2019	Body Composition of high school students in Montenegro and its relationship with their eating habits	National	Both	18-20	18-20	504	497	contact
MAR_1992_DHS	Morocco	1992	DHS	National	Both		20-49		2804	included in 'Survey data' tab
MAR_2004_DHS	Morocco	2003-2004	DHS	National	Both		15-49		15944	included in 'Survey data' tab
MAR_2017_STEPS	Morocco	2017	STEPS	National	Both	18+	18+	1871	3390	included in 'Survey data' tab
MAR_2000_NS	Morocco	2000	National Survey 2000	National	Both	20+	20+	755	1047	contact
MOZ_1997_DHS	Mozambique	1997	DHS	National	Both		20-49		2824	included in 'Survey data' tab
MOZ_2003_DHS	Mozambique	2003	DHS	National	Both		15-49		10535	included in 'Survey data' tab
MOZ_2005_STEPS	Mozambique	2005	STEPS	National	Both	25-64	25-64	1276	1689	included in 'Survey data' tab
MOZ_2011_DHS	Mozambique	2011	DHS	National	Both		15-49		12201	included in 'Survey data' tab
MOZ_2015_STEPS	Mozambique	2014-2015	STEPS	National	Both	15-64	15-64	1147	1684	contact
MMR_2016_DHS	Myanmar	2015-2016	DHS	National	Both		15-49		12163	included in 'Survey data' tab
MMR_2004_STEPS	Myanmar	2003-2004	STEPS	Subnational	Both	25-74	25-74	1990	2449	contact
MMR_2009_STEPS	Myanmar	2009	STEPS	National	Both	15-64	15-64	2826	4421	contact
MMR_2011_Salin	Myanmar	2011	Underweight prevalence among young adults from rural areas, Salin Township, Magwe Region	Community	Rural	15-35	15-35	156	233	contact
MMR_2014_STEPS	Myanmar	2014	STEPS	National	Both	25-64	25-64	2947	5444	contact
MMR_2014_STEPSYangon	Myanmar	2013-2014	STEPS 2013-2014 Yangon	Subnational	Both	25-74	25-74	745	740	contact
NAM_1992_DHS	Namibia	1992	DHS	National	Both		20-49		2062	included in 'Survey data' tab
NAM_2005_STEPS	Namibia	2005	STEPS	National	Both	25-64	25-64	1390	1778	included in 'Survey data' tab
NAM_2007_DHS	Namibia	2006-2007	DHS	National	Both		15-49		8968	included in 'Survey data' tab
NAM_2013_DHS	Namibia	2013	DHS	National	Both		15-64		5111	included in 'Survey data' tab
NAM_2009_OS	Namibia	2009	Okambilimbili Survey	Community	Urban	5+	5+	962	1167	contact
NRU_2004_STEPS	Nauru	2004	STEPS	National	Both	15-64	15-64	1082	1149	included in 'Survey data' tab
NRU_2015_STEPS	Nauru	2015	STEPS	National	Rural	18-69	18-69	505	540	included in 'Survey data' tab
NRU_1987_NIDDM	Nauru	1987	Trends in the prevalence and incidence of non-insulin-dependent diabetes mellitus and impaired glucose tolerance	National	Both	20+	20+	555	667	contact
NRU_1994_NIDDM	Nauru	1994	Trends in the prevalence and incidence of non-insulin-dependent diabetes mellitus and impaired glucose tolerance	National	Both	25+	25+	647	731	contact
NRU_2006_STEPS	Nauru	2006	STEPS	National	Both	16-65	16-65	255	236	contact
NPL_1996_DHS	Nepal	1996	DHS	National	Both		20-49		3068	included in 'Survey data' tab
NPL_2001_DHS	Nepal	2001	DHS	National	Both		20-49		7216	included in 'Survey data' tab
NPL_2006_DHS	Nepal	2006	DHS	National	Both		15-49		10117	included in 'Survey data' tab
NPL_2011_DHS	Nepal	2011	DHS	National	Both		15-49		5848	included in 'Survey data' tab
NPL_2013_STEPS	Nepal	2012-2013	STEPS	National	Both	15-69	15-69	1326	2763	included in 'Survey data' tab
NPL_2016_DHS	Nepal	2016	DHS	National	Both	15-49	15-49	4035	6165	included in 'Survey data' tab
NPL_1997_4524005	Nepal	1997	Ohno et al., Asia Pac J Public Health 18(3):20-9, 2006	Community	Rural	17-75	17-75	36	41	contact
NPL_2003_STEPS	Nepal	2003	STEPS	Subnational	Both	25-64	25-64	1010	996	contact
NPL_2005_STEPS	Nepal	2005	STEPS	Subnational	Both	15-64	15-64	3634	3998	contact
NPL_2008_STEPS	Nepal	2007-2008	STEPS	National	Both	15-64	15-64	1889	2348	contact
NPL_2009_KHDC1	Nepal	2006-2011	Early detection and management of Kidney disease, Hypertension, Diabetes and Cardiovascular disease (KHDC Nepal), Tarahara	Community	Rural	18+	18+	1175	2350	contact
NPL_2009_KHDC2	Nepal	2006-2011	Early detection and management of Kidney disease, Hypertension, Diabetes and Cardiovascular disease (KHDC Nepal), Damak	Community	Urban	18+	18+	1095	1576	contact
NPL_2009_KHDC3	Nepal	2006-2011	Early detection and management of Kidney disease, Hypertension, Diabetes and Cardiovascular disease (KHDC Nepal), Dharan	Community	Urban	18+	18+	4130	6126	contact
NPL_2015_STEPSDhankuta	Nepal	2015	Community based intervention for prevention and control of non-communicable diseases risk factors (CIPCON) baseline survey, Dhankuta	Subnational	Rural	15-69	15-69	555	781	contact
NPL_2015_STEPSIlam	Nepal	2015	Community based intervention for prevention and control of non-communicable diseases risk factors (CIPCON) baseline survey, Ilam	Subnational	Rural	15-69	15-69	546	721	contact
NPL_2017_NCD	Nepal	2016-2018	The Population Based Prevalence of Selected Non-Communicable Diseases In Nepal	National	Both	20+	20+	4907	7529	contact
NLD_1985_INTERSALT	Netherlands	1985	INTERSALT	Community	Urban	20-59	20-59	100	99	included in 'Survey data' tab
NLD_1985_ZES	Netherlands	1985	Zutphen Elderly Study	Community	Urban	65-85		886		contact
NLD_1990_ZES	Netherlands	1990	Zutphen Elderly Study	Community	Urban	69-90		552		contact
NLD_1991_RSI	Netherlands	1989-1993	The Rotterdam Study, first subcohort	Community	Urban	55+	55+	2807	4103	contact
NLD_1993_LASA	Netherlands	1992-1993	The Longitudinal Aging Study Amsterdam (LASA)	Subnational	Both	55-85	55-85	1266	1308	contact
NLD_1994_RSI	Netherlands	1993-1995	The Rotterdam Study, first subcohort	Community	Urban	56+	56+	2214	3105	contact
NLD_1995_EPICbilthoven	Netherlands	1993-1997	EPIC Bilthoven	Community	Urban	20-59	20-59	9941	12021	contact
NLD_1995_EPICutrecht	Netherlands	1993-1997	EPIC Utrecht	Community	Both		49-70		17335	contact
NLD_1996_LASA	Netherlands	1995-1996	The Longitudinal Aging Study Amsterdam (LASA)	Subnational	Both	65-88	65-88	714	764	contact
NLD_1998_RSI	Netherlands	1997-1999	The Rotterdam Study, first subcohort	Community	Urban	61+	61+	1718	2361	contact
NLD_1999_LASA	Netherlands	1998-1999	The Longitudinal Aging Study Amsterdam (LASA)	Subnational	Both	61-91	61-91	604	743	contact
NLD_2000_Regenboog	Netherlands	1998-2001	Regenboog Project	National	Both	12-89	12-89	2714	2643	contact
NLD_2001_RSII	Netherlands	2000-2001	The Rotterdam Study, second subcohort	Community	Urban	55+	55+	1210	1468	contact
NLD_2002_LASA	Netherlands	2001-2002	The Longitudinal Aging Study Amsterdam (LASA)	Subnational	Both	64-94	64-94	577	690	contact
NLD_2002_SUNSET	Netherlands	2001-2003	Surinamese in the Netherlands: Study on Ethnicity and Health (SUNSET)	Community	Urban	35-60	35-60	251	257	contact
NLD_2003_LASA	Netherlands	2002-2003	The Longitudinal Aging Study Amsterdam (LASA)	Subnational	Both	54-65	54-65	431	482	contact
NLD_2003_RSI	Netherlands	2002-2004	The Rotterdam Study, first subcohort	Community	Urban	64+	64+	1206	1708	contact
NLD_2005_10528509	Netherlands	2003-2007	Doetinchem Cohort Study (4th measurement)	Subnational	Urban	36-74	36-74	2125	2352	contact
NLD_2005_RSII	Netherlands	2004-2005	The Rotterdam Study, second subcohort	Community	Urban	58+	58+	964	1244	contact
NLD_2006_LASA	Netherlands	2005-2006	The Longitudinal Aging Study Amsterdam (LASA)	Subnational	Both	57-97	57-97	789	958	contact
NLD_2007_RSIII	Netherlands	2006-2008	The Rotterdam Study, third subcohort	Community	Urban	45+	45+	1547	2029	contact
NLD_2009_LASA	Netherlands	2008-2009	The Longitudinal Aging Study Amsterdam (LASA)	Subnational	Both	60-100	60-100	642	789	contact
NLD_2010_NLM	Netherlands	2009-2010	Measuring the Netherlands (NL de Maat)	Subnational	Both	30-70	30-70	1781	2014	contact
NLD_2010_RSI	Netherlands	2009-2011	The Rotterdam Study, first subcohort	Community	Urban	72+	72+	690	1006	contact
NLD_2011_RSII	Netherlands	2011-2012	The Rotterdam Study, second subcohort	Community	Urban	65+	65+	735	934	contact
NLD_2012_LASA	Netherlands	2011-2012	The Longitudinal Aging Study Amsterdam (LASA)	Subnational	Both	63-104	63-104	532	653	contact
NLD_2013_HELIUS	Netherlands	2011-2015	Healthy Life in an Urban Setting (HELIUS)	Community	Urban	18-71	18-71	2088	2473	contact
NLD_2013_LASA	Netherlands	2012-2013	The Longitudinal Aging Study Amsterdam (LASA)	Subnational	Both	55-65	55-65	426	448	contact
NLD_2013_RSIII	Netherlands	2012-2014	The Rotterdam Study, third subcohort	Community	Urban	52+	52+	1256	1639	contact
NLD_2016_LASA	Netherlands	2015-2016	The Longitudinal Aging Study Amsterdam (LASA)	Subnational	Both	58+	58+	759	857	contact
NZL_1993_MONICA-AUCa	New Zealand	1993-1994	MONICA, Auckland	Community	Urban	35-64	35-64	723	674	included in 'Survey data' tab
NZL_1989_LINZ	New Zealand	1989	The Life in New Zealand Survey	National	Both	15+	15+	1418	1571	contact
NZL_1992_6554056	New Zealand	1990-1993	Williams, N Z Med J 113(1114):308-11, 2000	Community	Both	18-21	18-21	932	859	contact
NZL_1997_NNS	New Zealand	1996-1997	National Nutrition Survey	National	Both	15+	15+	1857	2522	contact
NZL_2003_NZHS	New Zealand	2002-2003	New Zealand Health Survey	National	Both	15+	15+	4594	6729	contact
NZL_2007_NZHS	New Zealand	2006-2007	New Zealand Health Survey	National	Both	5+	5+	6766	8032	contact
NZL_2009_ANS	New Zealand	2008-2009	New Zealand Adult Nutrition Survey	National	Both	15+	15+	2003	2500	contact
NZL_2012_NZHS	New Zealand	2011-2012	New Zealand Health Survey	National	Both	5+	5+	5783	7220	contact
NZL_2013_NZHS	New Zealand	2012-2013	New Zealand Health Survey	National	Both	5+	5+	6409	7926	contact
NZL_2014_NZHS	New Zealand	2013-2014	New Zealand Health Survey	National	Both	5+	5+	6971	8310	contact
NZL_2015_NZHS	New Zealand	2014-2015	New Zealand Health Survey	National	Both	5+	5+	7128	8437	contact
NZL_2016_NZHS	New Zealand	2015-2016	New Zealand Health Survey	National	Both	5+	5+	7258	8451	contact
NIC_1998_DHS	Nicaragua	1997-1998	DHS	National	Both		15-49		12257	included in 'Survey data' tab
NIC_2001_DHS	Nicaragua	2001	DHS	National	Both		15-49		11940	included in 'Survey data' tab
NIC_2004_CAMDI	Nicaragua	2003-2004	CAMDI	Community	Urban	20+	20+	773	916	contact
NIC_2004_SIVIN	Nicaragua	2003-2005	Sistema Integrado de Vigilancia de Intervenciones Nutricionales (SIVIN)	National	Both		15-50		1115	contact
NIC_2007_ENDESA	Nicaragua	2006-2007	Encuesta Nicaraguense de Demografia y Salud	National	Both		15-49		13216	contact
NIC_2012_ENDESA	Nicaragua	2011-2012	Encuesta Nicaraguense de Demografia y Salud	National	Both		15-49		14318	contact
NER_1992_DHS	Niger	1992	DHS	National	Both		20-49		2993	included in 'Survey data' tab
NER_1998_DHS	Niger	1998	DHS	National	Both		20-49		2958	included in 'Survey data' tab
NER_2006_DHS	Niger	2006	DHS	National	Both		15-49		4151	included in 'Survey data' tab
NER_2007_STEPS	Niger	2007	STEPS	National	Both	15-64	15-64	1430	1215	included in 'Survey data' tab
NER_2012_DHS	Niger	2012	DHS	National	Both		15-49		4429	included in 'Survey data' tab
NGA_1999_DHS	Nigeria	1999	DHS	National	Both		20-49		2004	included in 'Survey data' tab
NGA_2003_DHS	Nigeria	2003	DHS	National	Both		15-49		6605	included in 'Survey data' tab
NGA_2008_DHS	Nigeria	2008	DHS	National	Both		15-49		28973	included in 'Survey data' tab
NGA_2013_DHS	Nigeria	2013	DHS	National	Both		15-49		33943	included in 'Survey data' tab
NGA_1990_NCDNS_rural	Nigeria	1990	Non-communicable Diseases National Survey	National	Rural	15+	15+	3618.92	3681.72	contact
NGA_1990_NCDNS_urban	Nigeria	1990	Non-communicable Diseases National Survey	National	Urban	15+	15+	1616.93	1645	contact
NGA_1993_21566001	Nigeria	1991-1994	Cooper et al., Am J Public Health 87(2):160-68, 1997	Community	Both	20-100	20-100	910	1080	contact
NGA_2005_citUkoli	Nigeria	1999-2009	Prostate cancer dietary risk factors study	Subnational	Both	35+		627		contact
NGA_2007_ISA	Nigeria	2007	Ibadan Study of Ageing	Subnational	Both	60+	60+	642	914	contact
NGA_2008_ISA	Nigeria	2008	Ibadan Study of Ageing	Subnational	Both	61+	61+	453	656	contact
NGA_2009_ISA	Nigeria	2009	Ibadan Study of Ageing	Subnational	Both	62+	62+	420	619	contact
NGA_2009_KCS	Nigeria	2009	Community Health Plan - Kwara Central Survey	Community	Rural	5+	5+	2264	2354	contact
NGA_2011_KCS	Nigeria	2011	Community Health Plan - Kwara Central Survey	Community	Rural	5+	5+	791	853	contact
NGA_2013_KCS	Nigeria	2013	Community Health Plan - Kwara Central Survey	Community	Rural	5+	5+	714	754	contact
NGA_2018_citOchimana	Nigeria	2018	Hypertension Prevalence, Awareness, Treatment and Control in Rural Area, Nigeria	Community	Rural	18+	18+	189	202	contact
NIU_2011_STEPS	Niue	2011	STEPS	National	Both	15+	15+	407	478	included in 'Survey data' tab
NOR_1985_HUNT	Norway	1984-1986	HUNT1 Study	Subnational	Rural	20+	20+	36517	37811	contact
NOR_1987_Tromso	Norway	1986-1987	The Tromsø Study: Tromsø 3	Community	Both	20-61	20-56	10374	9804	contact
NOR_1993_HUSK-bc2527	Norway	1992-1993	The Hordaland Health Study (HUSK) 1925-1927 birth cohort	Community	Urban	65-67	65-67	2123	2630	contact
NOR_1993_HUSK-bc2849	Norway	1992-1993	The Hordaland Health Study (HUSK) 1928-1949 birth cohort	Community	Urban	43-64	43-64	335	348	contact
NOR_1993_HUSK-bc5052	Norway	1992-1993	The Hordaland Health Study (HUSK) 1950-1952 birth cohort	Subnational	Both	40-42	40-42	6103	6475	contact
NOR_1995_Tromso	Norway	1994-1995	The Tromsø Study: Tromsø 4	Community	Both	25+	25+	12782	13836	contact
NOR_1996_HUNT	Norway	1995-1997	HUNT2 study	Subnational	Rural	20+	20+	30285	33599	contact
NOR_1996_YHUNT	Norway	1995-1997	Young-HUNT1 Study	Subnational	Rural	12-21	12-21	4203	4253	contact
NOR_1998_HUSK-bc2527	Norway	1997-1999	The Hordaland Health Study (HUSK) 1925-27 birth cohort	Community	Urban	70-74	70-74	1465	1839	contact
NOR_1998_HUSK-bc5057	Norway	1997-1999	The Hordaland Health Study (HUSK) 1950-1957 birth cohort	Subnational	Both	40-47	40-47	10180	11928	contact
NOR_2001_YHUNT	Norway	2000-2001	Young-HUNT2 Study	Subnational	Rural	16-21	16-21	764	901	contact
NOR_2002_HOT	Norway	2000-2003	The Oslo cohort (HUBRO), the Oppland and Hedmark cohort (OPPHED), and the Troms and Finnmark cohort (TROFINN ) of Cohort Norway	Subnational	Both	30-76	30-76	16825	20592	contact
NOR_2002_Tromso	Norway	2001-2002	The Tromsø Study: Tromsø 5, Tromsø Study Panel	Community	Both	30-89	30-89	2525	3579	contact
NOR_2007_HUNT	Norway	2006-2008	HUNT3 Study	Subnational	Rural	20+	20+	22860	27553	contact
NOR_2007_YHUNT	Norway	2006-2008	Young-HUNT3 Study	Subnational	Rural	12-21	12-21	3807	3792	contact
NOR_2008_Tromso	Norway	2007-2008	The Tromsø Study: Tromsø 6	Community	Both	30-87	30-87	6048	6889	contact
PSE_2010_STEPS	Occupied Palestinian Territory	2010	STEPS	National	Both	15-64	15-64	2578	4052	included in 'Survey data' tab
PSE_1996_15275022	Occupied Palestinian Territory	1996	Stene et al., Eur J Clin Nutr 55(9):805-11, 2001	Community	Rural	30-65	30-65	208	269	contact
PSE_1997_citAbu-Rmeilehrural	Occupied Palestinian Territory	1996-1998	Kobar, rural	Community	Rural	15-64	15-64	206	482	contact
PSE_1997_citAbu-Rmeilehurban	Occupied Palestinian Territory	1996-1998	Old Ramallah, urban	Community	Urban	15-64	15-64	182	493	contact
PSE_2000_FNHANES	Occupied Palestinian Territory	1999-2000	The First National Health and Nutrition Survey	National	Both	18-64	18-64	1736	1869	contact
OMN_2017_STEPS	Oman	2017	STEPS	National	Both	15+	15+	3405	3034	included in 'Survey data' tab
OMN_1991_ONHS	Oman	1991	Oman National Health Survey	National	Both	20+	20+	2128	2958	contact
OMN_2000_ONHS	Oman	2000	Oman National Health Survey	National	Both	20+	20+	3069	3331	contact
OMN_2001_15512029	Oman	2001	Al-Lawati et al., Diabetes Care 26(6):1781-85, 2003	Community	Urban	20+	20+	755	756	contact
OMN_2006_STEPS	Oman	2006	STEPS	Community	Urban	20-59	20-59	540	732	contact
OMN_2008_WHS	Oman	2008	Gulf Cooperation Council World Health Survey	National	Both	18+	18+	2389	2112	contact
PAK_2013_DHS	Pakistan	2012-2013	DHS	National	Both		20-49		3968	included in 'Survey data' tab
PAK_2014_STEPS	Pakistan	2014	STEPS	Subnational	Both	18-69	18-69	2964	3674	included in 'Survey data' tab
PAK_2018_DHS	Pakistan	2017-2018	DHS	National	Both		15-49		4493	included in 'Survey data' tab
PAK_1992_4586081	Pakistan	1990-1994	MHS	Community	Urban	18+	18+	432	478	contact
PAK_1992_NHSP	Pakistan	1990-1994	National Health Survey Of Pakistan 1990-1994	National	Both	5+	5+	7110	7405	contact
PAK_1996_4586040	Pakistan	1996	Gupta et al., Int J Cardiol 97(2):257-61, 2004	Community	Urban	20+	20+	523	559	contact
PAK_1999_4586045	Pakistan	1999	Shah et al., Trop Med Int Health 9(4):526-32, 2004	Community	Both	18+	18+	1391	2754	contact
PAK_2005_4586094	Pakistan	2004-2005	COBRA-1	Community	Urban	40+	40+	1500	1635	contact
PAK_2005_STEPS	Pakistan	2005	STEPS	National	Both	25-65	25-65	787	1071	contact
PAK_2011_NNS	Pakistan	2011	National Nutrition Survey	National	Both	5-49	5-49	21461	48503	contact
PAK_2017_NDSP	Pakistan	2016-2017	National Diabetes Survey of Pakistan	National	Both	20+	20+	3771	4647	contact
PLW_2012_STEPS	Palau	2011-2013	STEPS	National	Both	25-64	25-64	1031	1124	included in 'Survey data' tab
PLW_2016_STEPS	Palau	2016	STEPS	National	Both	18+	18+	713	711	included in 'Survey data' tab
PAN_2003_ENV	Panama	2003	Encuesta de Niveles de Vida	National	Both	5+	5+	10808	11133	contact
PAN_2003_SLSS	Panama	2003	Second Living Standards Survey	National	Both	18-75	18-75	6844	7100	contact
PAN_2011_PREFREC	Panama	2010-2011	Prevalencia de factores de riesgo asociados a enfermedad cardiovascular 2010-2011	Subnational	Both	18+	18+	1067	2469	contact
PNG_1986_INTERSALT	Papua New Guinea	1985-1986	INTERSALT	Community	Rural	20-59	20-59	88	74	included in 'Survey data' tab
PNG_2007_STEPS	Papua New Guinea	2007	STEPS	National	Both	15-64	15-64	1401	1440	included in 'Survey data' tab
PRY_2011_enctfactriesgo	Paraguay	2011	Primera Encuesta Nacional de Factores de Riesgo de Enfermedades No Transmisibles en Poblacion General	National	Both	15-75	15-75	931	1574	contact
PER_1992_DHS	Peru	1991-1992	DHS	National	Both		15-49		4887	included in 'Survey data' tab
PER_1996_DHS	Peru	1996	DHS	National	Both		20-49		10125	included in 'Survey data' tab
PER_2000_DHS	Peru	2000	DHS	National	Both		15-49		25508	included in 'Survey data' tab
PER_2005_DHS	Peru	2004-2006	DHS	National	Both		15-49		5798	included in 'Survey data' tab
PER_2008_CENAN	Peru	2007-2008	Monitoreo de Indicadores Nutricionales en la ENAHO 2007-2008	National	Both	5+	5+	15041	16282	included in 'Survey data' tab
PER_2008_DHS	Peru	2007-2008	DHS	National	Both		15-49		20918	included in 'Survey data' tab
PER_2009_DHS	Peru	2009	DHS	National	Both		15-49		23034	included in 'Survey data' tab
PER_2010_CENAN	Peru	2009-2011	Monitoreo de Indicadores Nutricionales en la ENAHO 2009-2010	National	Both	5+	5+	27753	31269	included in 'Survey data' tab
PER_2010_DHS	Peru	2010	DHS	National	Both		15-49		22425	included in 'Survey data' tab
PER_2011_DHS	Peru	2011	DHS	National	Both		15-49		22215	included in 'Survey data' tab
PER_2012_CENAN	Peru	2011-2012	Monitoreo de Indicadores Nutricionales en la ENAHO 2011	National	Both	5+	5+	7424	8424	included in 'Survey data' tab
PER_2012_DHS	Peru	2012	DHS	National	Both		15-49		23724	included in 'Survey data' tab
PER_2013_DHS	Peru	2013	DHS	National	Both	15+	15+	2932	23784	included in 'Survey data' tab
PER_2014_DHS	Peru	2014	DHS	National	Both	15+	15+	12670	28582	included in 'Survey data' tab
PER_2015_DHS	Peru	2015	DHS	National	Both	15+	15+	14744	38415	included in 'Survey data' tab
PER_2016_DHS	Peru	2016	DHS	National	Both	15+	15+	14037	35999	included in 'Survey data' tab
PER_2017_DHS	Peru	2017	DHS	National	Both	15+	15+	14340	37386	included in 'Survey data' tab
PER_2003_FRENTvilla	Peru	2003	Factores de Riesgo de Enfermedades No Transmisibles	Community	Urban	16+	16+	327	503	contact
PER_2004_FRENTtrujillo	Peru	2004	Factores de Riesgo de Enfermedades No Transmisibles	Community	Urban	15+	15+	218	445	contact
PER_2005_11604002	Peru	2004-2005	PREVENCION Study	Community	Urban	20-80	20-80	867	1011	contact
PER_2005_CARMELA	Peru	2004-2005	CArdiovascular Risk factors Multiple Evaluation in Latin America	Community	Urban	25-64	25-64	769	876	contact
PER_2005_ENIN	Peru	2004-2005	Encuesta Nacional de Indicadores Nutricionales, Bioquímicos, Socioeconómicos y Culturales Relacionados con las Enfermedades Crónicas Degenerativas	National	Both	20+	20+	2087	2095	contact
PER_2005_FRENThuancayo	Peru	2005	Factores de Riesgo de Enfermedades No Transmisibles	Community	Urban	15+	15+	209	550	contact
PER_2006_FRENTlima	Peru	2006	Factores de Riesgo de Enfermedades No Transmisibles	Community	Urban	15+	15+	662	1101	contact
PER_2008_monin	Peru	2007-2010	Monitoreo Nacional de Indicadores Nutricionales	National	Both		12-49		3874	contact
PER_2008_PMS	Peru	2007-2008	PERU MIGRANT Study	Community	Both	30+	30+	464	522	contact
PER_2011_CRONICAS	Peru	2009-2012	CRONICAS Cohort Study	Subnational	Both	35+	35+	1557	1660	contact
PER_2012_CRONICAS	Peru	2010-2013	CRONICAS Cohort Study	Subnational	Both	35+	35+	1379	1468	contact
PER_2013_ElderlySMP	Peru	2013	Clinical functional and sociofamilial profiles of the elderly from a community in a district of Lima, Peru	Community	Urban	60+	60+	185	309	contact
PER_2013_PMS	Peru	2012-2013	PERU MIGRANT Study	Community	Both	35+	35+	339	427	contact
PER_2014_CRONICAS	Peru	2013-2014	CRONICAS Cohort Study	Subnational	Both	36+	36+	1292	1361	contact
PER_2014_SALT	Peru	2014	Launching a salt substitute to reduce blood pressure at the population level: a cluster randomized stepped wedge trial in Peru	Subnational	Both	18+	18+	1149	1166	contact
PER_2016_PMS	Peru	2015-2016	PERU MIGRANT Study	Community	Both	38+	38+	324	414	contact
PER_2017_T2DMSCREENING	Peru	2016-2017	Sceening of T2DM	Community	Urban	30-70	30-70	798	809	contact
PER_2018_DHS	Peru	2018	DHS	National	Both	15+	15+	14600	39575	contact
PER_2019_DHS	Peru	2019	DHS	National	Both	15+	15+	14200	37943	contact
PHL_1985_CLHNS-BFU10	Philippines	1985-1986	Cebu Longitudinal Health and Nutrition Survey Baseline 20-Month Follow-up	Community	Both		15-50		2047	included in 'Survey data' tab
PHL_1985_CLHNS-BFU11	Philippines	1985-1986	Cebu Longitudinal Health and Nutrition Survey Baseline 22-Month Follow-up	Community	Both		15-50		2017	included in 'Survey data' tab
PHL_1985_CLHNS-BFU12	Philippines	1985-1986	Cebu Longitudinal Health and Nutrition Survey Baseline 24-Month Follow-up	Community	Both		15-50		2022	included in 'Survey data' tab
PHL_1985_CLHNS-BFU8	Philippines	1984-1985	Cebu Longitudinal Health and Nutrition Survey Baseline 16-Month Follow-up	Community	Both		15-50		2129	included in 'Survey data' tab
PHL_1985_CLHNS-BFU9	Philippines	1984-1985	Cebu Longitudinal Health and Nutrition Survey Baseline 18-Month Follow-up	Community	Both		15-50		2079	included in 'Survey data' tab
PHL_1991_CLHNS-Mom	Philippines	1991-1992	Cebu Longitudinal Health and Nutrition Survey 1991 Mother Follow-up	Community	Both		22-55		2195	included in 'Survey data' tab
PHL_1995_CLHNS-Mom	Philippines	1994-1995	Cebu Longitudinal Health and Nutrition Survey 1994-1995 Mother Follow-up	Community	Both		15-59		2692	included in 'Survey data' tab
PHL_1999_CLHNS-Mom	Philippines	1998-1999	Cebu Longitudinal Health and Nutrition Survey 1998-1999 Mother Follow-up	Community	Both		15-59		1911	included in 'Survey data' tab
PHL_2002_CLHNS-Mom	Philippines	2002	Cebu Longitudinal Health and Nutrition Survey 2002 Mother Follow-up	Community	Both		32-66		2080	included in 'Survey data' tab
PHL_2005_CLHNS-Child	Philippines	2005	Cebu Longitudinal Health and Nutrition Survey 2005 Child Follow-up	Community	Both	20-22	20-22	1006	831	included in 'Survey data' tab
PHL_2005_CLHNS-Mom	Philippines	2005	Cebu Longitudinal Health and Nutrition Survey 2005 Mother Follow-up	Community	Both		35-69		2001	included in 'Survey data' tab
PHL_2007_CLHNS-Child	Philippines	2007	Cebu Longitudinal Health and Nutrition Survey 2007 Child Follow-up	Community	Both	23-24	23-24	937	751	included in 'Survey data' tab
PHL_2007_CLHNS-Mom	Philippines	2007	Cebu Longitudinal Health and Nutrition Survey 2007 Mother Follow-up	Community	Both		38-71		1925	included in 'Survey data' tab
PHL_2009_CLHNS-Child	Philippines	2009	Cebu Longitudinal Health and Nutrition Survey 2009 Child Follow-up	Community	Both	24-26	24-26	864	718	included in 'Survey data' tab
PHL_1988_5608001	Philippines	1988	INCLEN	Community	Rural	35-65		274		contact
PHL_1993_NNS	Philippines	1993	4th National Nutrition Survey Philippine	National	Both	20-70	20-70	4383	4754	contact
PHL_1993_NSMS	Philippines	1993	National Safe Motherhood Survey	National	Both		15-49		7181	contact
PHL_1998_NNS	Philippines	1998	5th National Nutrition Survey Philippine	National	Both	20-60	20-60	1323	1340	contact
PHL_2003_NNSfullanthro	Philippines	2003	6th National Nutrition Survey Philippine	National	Both	5+	5+	10686	11131	contact
PHL_2004_NNHeS	Philippines	2003-2004	National Nutrition and Health Survey	National	Both	15+	15+	30231	33295	contact
PHL_2008_NNS	Philippines	2008	7th National Nutrition Survey	National	Both	5+	5+	64001	63616	contact
PHL_2011_NNS	Philippines	2011	2011 Updating of Nutritional Status of Filipino Children	National	Both	5+	5+	63654	66866	contact
PHL_2014_NNS	Philippines	2013-2014	8th National Nutrition Survey	National	Both	5+	5+	57432	61620	contact
PHL_2015_NNS	Philippines	2015	2015 Updating of Nutritional Status of Filipino Children and Other Population Groups	National	Both	5+	5+	69309	73250	contact
POL_1986_INTERSALT-Krakow	Poland	1986	INTERSALT, Krakow	Community	Urban	20-59	20-59	100	100	included in 'Survey data' tab
POL_1986_INTERSALT-Warsaw	Poland	1986	INTERSALT, Warsaw	Community	Urban	20-59	20-59	100	100	included in 'Survey data' tab
POL_1988_MONICA-TARa	Poland	1987-1988	MONICA, Tarnobrzeg Voivodship	Community	Rural	35-64	35-64	616	672	included in 'Survey data' tab
POL_1988_MONICA-WARa	Poland	1988-1989	MONICA, Warsaw	Community	Urban	35-64	35-64	705	713	included in 'Survey data' tab
POL_1993_MONICA-TARa	Poland	1992-1993	MONICA, Tarnobrzeg Voivodship	Community	Rural	35-64	35-64	618	692	included in 'Survey data' tab
POL_1993_MONICA-WARa	Poland	1993	MONICA, Warsaw	Community	Urban	35-64	35-64	751	763	included in 'Survey data' tab
POL_1989_CINDI	Poland	1989-1990	Polish Program CINDI (CINDI Lodz 1989-1990)	Community	Urban	25-64	25-64	831	957	contact
POL_1996_CINDI	Poland	1995-1996	Polish Program CINDI (CINDI Lodz 1995)	Community	Urban	17-64	17-64	997	1459	contact
POL_2000_CINDI	Poland	2000	The health status, risk factors of chronic diseases and health behaviors of residents of Torun (CINDI Torun 2000)	Community	Urban	16-83	16-83	989	1054	contact
POL_2001_HFCAS	Poland	2000-2001	Household Food Consumption and Anthropometric Survey	National	Both	5+	5+	1766	2107	contact
POL_2002_CINDI	Poland	2001-2002	The health status, risk factors of chronic diseases and health behaviors of residents of Lodz (CINDI Lodz 2001)	Community	Urban	18-64	18-64	1000	840	contact
POL_2002_CINDI-senior	Poland	2002	The health status, risk factors of chronic diseases and health behaviors of residents of Lodz - seniors (CINDI Lodz 2002)	Community	Urban	65+	65+	285	532	contact
POL_2002_NATPOL	Poland	2002	NATPOL	National	Both	18+	18+	1018	1301	contact
POL_2003_EMAS	Poland	2003	The European Male Ageing Study	Community	Both	40+		406		contact
POL_2004_HAPIEE	Poland	2002-2005	Health, Alcohol and Psychosocial Factors In Eastern Europe	Community	Urban	45-70	45-70	4502	4752	contact
POL_2004_LIPIDOGRAM	Poland	2004	LIPIDOGRAM2004 Study - National epidemiological study of lipid disorders and selected risk factors of cardiovascular disease in primary health care in Poland	National	Both	30+	30+	6673	9920	contact
POL_2004_WOBASZ	Poland	2003-2005	National Multicenter Health Survey in Poland. Project WOBASZ	National	Both	20-74	20-74	6245	6910	contact
POL_2005_MHESS	Poland	2003-2006	Mogielica Human Ecology Study Site	Community	Rural	18+	18+	119	321	contact
POL_2006_CINDI	Poland	2006	The health, risk factors for chronic diseases, attitudes and behaviors of health residents of Torun (CINDI Torun 2006)	Community	Urban	15-65	15-65	790	1147	contact
POL_2006_LIPIDOGRAM	Poland	2006	LIPIDOGRAM2006 Study - National epidemiological study of lipid disorders and selected risk factors of cardiovascular disease in primary health care in Poland	National	Both	32+	32+	6441	10640	contact
POL_2008_EMAS	Poland	2008	The European Male Ageing Study	Community	Both	40+		310		contact
POL_2009_MHESS	Poland	2007-2010	Mogielica Human Ecology Study Site	Community	Rural	18+	18+	133	290	contact
POL_2009_PolSenior	Poland	2007-2011	Medical, psychological and socioeconomic aspects of aging in Poland	National	Both	55+	55+	2750	2582	contact
POL_2011_NATPOL	Poland	2011	NATPOL	National	Both	18-79	18-79	1158	1235	contact
POL_2013_MHESS	Poland	2011-2014	Mogielica Human Ecology Study Site	Community	Rural	18+	18+	142	418	contact
POL_2014_WOBASZ	Poland	2013-2014	National Multicenter Health Survey in Poland. Project WOBASZ II	National	Both	20+	20+	2626	3198	contact
POL_2016_LIPIDOGRAM	Poland	2015-2016	LIPIDOGRAM2015 & LIPIDOGEN2015 Study - National epidemiological study of lipid disorders and selected risk factors of cardiovascular disease in primary health care in Poland	National	Both	18+	18+	5034	8690	contact
POL_2018_MHESS	Poland	2018	Mogielica Human Ecology Study Site	Community	Rural	18+	18+	30	95	contact
PRT_1986_INTERSALT	Portugal	1986	INTERSALT	Community	Rural	20-59	20-59	99	99	included in 'Survey data' tab
PRT_1985_CON	Portugal	1985	Body Mass Index of Portuguese Conscripts	National	Both	18-20		29420		contact
PRT_1986_CON	Portugal	1986	Body Mass Index of Portuguese Conscripts	National	Both	18-20		70504		contact
PRT_1987_CON	Portugal	1987	Body Mass Index of Portuguese Conscripts	National	Both	18-20		68079		contact
PRT_1988_CON	Portugal	1988	Body Mass Index of Portuguese Conscripts	National	Both	18-20		67573		contact
PRT_1989_CON	Portugal	1989	Body Mass Index of Portuguese Conscripts	National	Both	18-20		68827		contact
PRT_1990_CON	Portugal	1990	Body Mass Index of Portuguese Conscripts	National	Both	18-20		44359		contact
PRT_1991_CON	Portugal	1991	Body Mass Index of Portuguese Conscripts	National	Both	18-20		19552		contact
PRT_1992_CON	Portugal	1992	Body Mass Index of Portuguese Conscripts	National	Both	18-20		52393		contact
PRT_1993_CON	Portugal	1993	Body Mass Index of Portuguese Conscripts	National	Both	18-20		59780		contact
PRT_1994_CON	Portugal	1994	Body Mass Index of Portuguese Conscripts	National	Both	18-20		55511		contact
PRT_1995_CON	Portugal	1995	Body Mass Index of Portuguese Conscripts	National	Both	18-20		68221		contact
PRT_1996_CON	Portugal	1996	Body Mass Index of Portuguese Conscripts	National	Both	18-21		106097		contact
PRT_1997_CON	Portugal	1997	Body Mass Index of Portuguese Conscripts	National	Both	18-21		61215		contact
PRT_1998_CON	Portugal	1998	Body Mass Index of Portuguese Conscripts	National	Both	18-21		41027		contact
PRT_1999_CON	Portugal	1999	Body Mass Index of Portuguese Conscripts	National	Both	18-21		54187		contact
PRT_2000_CON	Portugal	2000	Body Mass Index of Portuguese Conscripts	National	Both	18-21		53326		contact
PRT_2001_EPIPorto	Portugal	1999-2003	EPIPorto Study	Community	Urban	18+	18+	932	1507	contact
PRT_2004_POP	Portugal	2003-2005	Estudo de Prevalência da Obesidade e Consumos Alimentares em Portugal	National	Both	18-64	18-64	3796	4320	contact
PRT_2008_PNSPAPF	Portugal	2007-2009	Portuguese National Survey of Physical Activity and Physical Fitness	National	Both	9+	9+	14914	18025	contact
PRT_2011_ELDERLY	Portugal	2010-2012	Exercise for Elderly	Community	Urban	60-84	60-84	48	104	contact
PRT_2012_EPITeen	Portugal	2011-2013	EPITeen - Epidemiological Health Investigation of Teenagers in Porto	Community	Urban	20-23	20-23	854	895	contact
PRI_2003_PREHCO	Puerto Rico	2002-2003	Puerto Rican Elderly: Health Conditions	National	Both	60+	60+	1914	2850	contact
PRI_2006_14630035	Puerto Rico	2005-2007	Perez et al., Ethn Dis 18(4):434-41, 2008	Community	Urban	15-84	15-84	275	529	contact
PRI_2007_PREHCO	Puerto Rico	2006-2007	Puerto Rican Elderly: Health Conditions	National	Both	60+	60+	1056	1669	contact
PRI_2012_HPVinfection	Puerto Rico	2010-2013	HPV Infection in a Population-Based Sample of Puerto Rican Women	Subnational	Both		16-64		563	contact
QAT_2012_STEPS	Qatar	2012	STEPS	National	Both	18-64	18-64	1034	1353	included in 'Survey data' tab
QAT_2006_GCC	Qatar	2006	World Health Survey	National	Both	18+	18+	1859	2018	contact
ROU_1987_MONICA-BUCa	Romania	1986-1987	MONICA, Bucharest	Community	Urban	25-64	25-64	702	873	included in 'Survey data' tab
ROU_1997_SOMAT	Romania	1997	Somatometria	National	Both	15-75	15-75	3142	4063	contact
ROU_2010_SRS	Romania	2009-2011	Study on children in Dolj County, South Romania	Subnational	Both	5-21	5-21	746	672	contact
ROU_2012_SEPHAR	Romania	2011-2012	Study for the Evaluation of Prevalence of Hypertension and cArdiovascular Risk among the Adult Population of Romania - SEPHAR II	National	Both	18-80	18-80	927	1023	contact
ROU_2016_SEPHAR	Romania	2015-2016	Study for the Evaluation of Prevalence of Hypertension and cArdiovascular Risk among the Adult Population of Romania - SEPHAR III	National	Both	18-80	18-80	936	1034	contact
RUS_1985_MONICA-MOCa	Russian Federation	1984-1986	MONICA, Moscow (control)	Community	Urban	35-64	35-64	774	642	included in 'Survey data' tab
RUS_1985_MONICA-MOI2	Russian Federation	1984-1986	MONICA, Moscow, Leninsky district	Community	Urban	35-64	35-64	553	622	included in 'Survey data' tab
RUS_1985_MONICA-MOI3	Russian Federation	1984-1986	MONICA, Moscow, Cheremushkinsky district	Community	Urban	35-64	35-64	580	579	included in 'Survey data' tab
RUS_1985_MONICA-NOIa	Russian Federation	1985	MONICA, Novosibirsk (intervention)	Community	Urban	25-64	25-64	797	818	included in 'Survey data' tab
RUS_1986_INTERSALT	Russian Federation	1986	INTERSALT	Community	Urban	20-59	20-59	97	97	included in 'Survey data' tab
RUS_1986_MONICA-NOC3	Russian Federation	1985-1986	MONICA, Novosibirsk, Kirowsky district	Community	Urban	25-64	25-64	758	774	included in 'Survey data' tab
RUS_1986_MONICA-NOC4	Russian Federation	1985-1986	MONICA, Novosibirsk, Leninsky district	Community	Urban	25-64	25-64	624	624	included in 'Survey data' tab
RUS_1988_MONICA-NOIa	Russian Federation	1988	MONICA, Novosibirsk (intervention)	Community	Urban	25-64	25-64	837	852	included in 'Survey data' tab
RUS_1989_MONICA-MOCa	Russian Federation	1988-1989	MONICA, Moscow (control)	Community	Urban	35-64	35-64	620	581	included in 'Survey data' tab
RUS_1989_MONICA-MOI2	Russian Federation	1988-1989	MONICA, Moscow, Leninsky district	Community	Urban	35-64	35-64	597	612	included in 'Survey data' tab
RUS_1989_MONICA-NOC3	Russian Federation	1988-1989	MONICA, Novosibirsk, Kirowsky district	Community	Urban	25-64	25-64	871	705	included in 'Survey data' tab
RUS_1993_MONICA-MOCa	Russian Federation	1992-1995	MONICA, Moscow (control)	Community	Urban	35-64	35-64	556	527	included in 'Survey data' tab
RUS_1993_MONICA-MOI2	Russian Federation	1992-1995	MONICA, Moscow, Leninsky district	Community	Urban	35-64	35-64	538	858	included in 'Survey data' tab
RUS_1993_RLMS_R2	Russian Federation	1992-1993	Russia Longitudinal Monitoring Survey-Higher School of Economics Round II	National	Both	5+	5+	4764	6348	included in 'Survey data' tab
RUS_1993_RLMS_R3	Russian Federation	1993	Russia Longitudinal Monitoring Survey-Higher School of Economics Round III	National	Both	5+	5+	6009	7685	included in 'Survey data' tab
RUS_1993_RLMS_R4	Russian Federation	1993-1994	Russia Longitudinal Monitoring Survey-Higher School of Economics Round IV	National	Both	5+	5+	5519	7094	included in 'Survey data' tab
RUS_1994_MONICA-NOIa	Russian Federation	1994-1995	MONICA, Novosibirsk (intervention)	Community	Urban	25-64	25-64	820	860	included in 'Survey data' tab
RUS_1994_RLMS	Russian Federation	1994	Russia Longitudinal Monitoring Survey-Higher School of Economics Round V	National	Both	5+	5+	4726	5788	included in 'Survey data' tab
RUS_1995_MONICA-NOC3	Russian Federation	1995	MONICA, Novosibirsk, Kirowsky district	Community	Urban	25-64	25-64	771	787	included in 'Survey data' tab
RUS_1995_RLMS	Russian Federation	1995	Russia Longitudinal Monitoring Survey-Higher School of Economics Round VI	National	Both	5+	5+	4463	5509	included in 'Survey data' tab
RUS_1996_RLMS	Russian Federation	1996	Russia Longitudinal Monitoring Survey-Higher School of Economics Round VII	National	Both	5+	5+	4377	5456	included in 'Survey data' tab
RUS_1998_RLMS	Russian Federation	1998-1999	Russia Longitudinal Monitoring Survey-Higher School of Economics Round VIII	National	Both	5+	5+	4497	5590	included in 'Survey data' tab
RUS_2000_RLMS	Russian Federation	2000	Russia Longitudinal Monitoring Survey-Higher School of Economics Round IX	National	Both	5+	5+	4600	5760	included in 'Survey data' tab
RUS_2001_RLMS	Russian Federation	2001	Russia Longitudinal Monitoring Survey-Higher School of Economics Round X	National	Both	5+	5+	5023	6440	included in 'Survey data' tab
RUS_2002_RLMS	Russian Federation	2002	Russia Longitudinal Monitoring Survey-Higher School of Economics Round XI	National	Both	5+	5+	5199	6604	included in 'Survey data' tab
RUS_2003_RLMS	Russian Federation	2003	Russia Longitudinal Monitoring Survey-Higher School of Economics Round XII	National	Both	5+	5+	5250	6674	included in 'Survey data' tab
RUS_2004_RLMS	Russian Federation	2004	Russia Longitudinal Monitoring Survey-Higher School of Economics Round XIII	National	Both	5+	5+	5219	6668	included in 'Survey data' tab
RUS_2005_RLMS	Russian Federation	2005	Russia Longitudinal Monitoring Survey-Higher School of Economics Round XIV	National	Both	5+	5+	5027	6453	included in 'Survey data' tab
RUS_2009_SAGE	Russian Federation	2007-2010	SAGE	National	Both	50+	50+	1254	2251	included in 'Survey data' tab
RUS_1992_9643001	Russian Federation	1992	CINDI	Community	Rural	25-64	25-64	377	453	contact
RUS_1992_RKS	Russian Federation	1992	Russian Karelia Survey in Pitkaranta	Community	Both	25-64	25-64	380	455	contact
RUS_1997_RKS	Russian Federation	1997	Russian Karelia Survey in Pitkaranta	Community	Both	25-64	25-64	309	440	contact
RUS_2002_RKS	Russian Federation	2002	Russian Karelia Survey in Pitkaranta	Community	Both	25-64	25-64	251	334	contact
RUS_2004_HAPIEE	Russian Federation	2002-2005	Health, Alcohol and Psychosocial Factors In Eastern Europe	Community	Urban	43-73	43-73	4259	5086	contact
RUS_2007_RKS	Russian Federation	2007	Russian Karelia Survey in Pitkaranta	Community	Both	25-64	25-64	176	276	contact
RUS_2016_UEMSrural	Russian Federation	2015-2017	Ural Eye and Medical Study (UEMS)	Subnational	Rural	40+	40+	1530	1870	contact
RUS_2016_UEMSurban	Russian Federation	2015-2017	Ural Eye and Medical Study (UEMS)	Community	Urban	40+	40+	1050	1449	contact
RWA_2000_DHS	Rwanda	2000	DHS	National	Both		15-49		9175	included in 'Survey data' tab
RWA_2005_DHS	Rwanda	2005	DHS	National	Both		15-49		5211	included in 'Survey data' tab
RWA_2010_DHS	Rwanda	2010	DHS	National	Both	15-59	15-49	6472	6572	included in 'Survey data' tab
RWA_2012_STEPS	Rwanda	2012	STEPS	National	Both	15-64	15-64	2644	4243	included in 'Survey data' tab
RWA_2015_DHS	Rwanda	2014-2015	DHS	National	Both	15-59	15-49	6366	6313	included in 'Survey data' tab
KNA_2007_STEPS	Saint Kitts and Nevis	2007	STEPS	Subnational	Both	25-64	25-64	510	852	included in 'Survey data' tab
LCA_2012_STEPS	Saint Lucia	2012	STEPS	National	Both	25-64	25-64	665	1097	included in 'Survey data' tab
LCA_1993_7662003	Saint Lucia	1991-1994	Cooper et al., Am J Public Health 87(2):160-68, 1997	Community	Urban	25-100	25-100	491	593	contact
VCT_2014_STEPS	Saint Vincent and the Grenadines	2013-2014	STEPS	National	Both	18-69	18-69	1524	1897	included in 'Survey data' tab
WSM_2002_STEPS	Samoa	2002	STEPS	National	Both	25-64	25-64	1181	1334	included in 'Survey data' tab
WSM_2013_STEPS	Samoa	2013	STEPS	National	Both	18-64	18-64	605	918	included in 'Survey data' tab
WSM_1991_citMcGARVEY	Samoa	1991	McGarvey, Pac Health Dialog 8(1):157-62, 2001	National	Both	25+	25+	347	381	contact
WSM_1993_citMcGARVEY	Samoa	1993	McGarvey, Pac Health Dialog 8(1):157-62, 2002	National	Both	27+	27+	285	336	contact
WSM_1995_citMcGARVEY	Samoa	1995	McGarvey, Pac Health Dialog 8(1):157-62, 2001	National	Both	29+	29+	156	157	contact
WSM_2010_GWAS	Samoa	2010	Samoan Genome-Wide Association Study	National	Both	24-65	24-65	1402	2061	contact
STP_2009_DHS	Sao Tome and Principe	2008-2009	DHS	National	Both	15-59	15-49	2173	2238	included in 'Survey data' tab
STP_2009_STEPS	Sao Tome and Principe	2009	STEPS	National	Both	25-64	25-64	998	1286	included in 'Survey data' tab
SAU_1987_NNS	Saudi Arabia	1985-1988	National Nutrition Survey	National	Both	5-75	5-75	4356	5944	contact
SAU_1992_NEHS	Saudi Arabia	1990-1993	National Epidemiological Household Survey	National	Both	15-60	15-60	4882	4509	contact
SAU_1992_NNS	Saudi Arabia	1989-1994	National Nutrition Survey	National	Both	18-40	18-40	2481	3294	contact
SAU_1992_SNS	Saudi Arabia	1990-1993	Saudi National Survey	National	Both	30-70	30-70	1612	1648	contact
SAU_1994_SHIS	Saudi Arabia	1992-1995	Saudi Health Information Survey	National	Both	14-50	14-50	4830	7707	contact
SAU_1995_NHS	Saudi Arabia	1995	National Household Survey	National	Both	20-70	20-70	7121.21	7073.52	contact
SAU_1998_NEHS	Saudi Arabia	1995-2000	National Epidemiological Health Survey	National	Both	30-70	30-70	8215	9008	contact
SAU_2004_15682064	Saudi Arabia	2004-2005	Al-Baghli et al., Saudi Med J 29(9):1319-25, 2008	Subnational	Both	30+	30+	97254	97254	contact
SAU_2005_STEPS	Saudi Arabia	2005	STEPS	National	Both	15-64	15-64	2245	2345	contact
SAU_2007_WHS	Saudi Arabia	2007	Gulf Cooperation Council World Health Survey	National	Both	18+	18+	4854	3610	contact
SAU_2012_JCS	Saudi Arabia	2011-2013	Jeddah City Study	Community	Urban	5+	5+	957	867	contact
SAU_2013_SHIS	Saudi Arabia	2013	Saudi Health Information Survey	National	Both	15+	15+	5088	5249	contact
SEN_1993_DHS	Senegal	1992-1993	DHS	National	Both		20-49		2713	included in 'Survey data' tab
SEN_2005_DHS	Senegal	2005	DHS	National	Both		15-49		4166	included in 'Survey data' tab
SEN_2011_DHS	Senegal	2010-2011	DHS	National	Both	15-59	15-49	4715	5497	included in 'Survey data' tab
SEN_1986_21686012	Senegal	1986	Astagneau et al., J Hypertens 10(9):1095-101, 1992	Community	Urban	15+	15+	651	707	contact
SEN_1986_21686014	Senegal	1986	Maire et al., Rev Epidemiol Sante Publique 40:252-58, 1992	Community	Urban		16-45		616	contact
SEN_2003_PHDBS	Senegal	2003	Perceptions of healthy and desirable body size in urban Senegalese women	Community	Urban		20-50		287	contact
SEN_2011_NTS	Senegal	2010-2012	Biocultural determinants of overweight and obesity in the context of nutrition transition in Senegal: a holistic anthropological approach	Subnational	Both	18+	18+	280	307	contact
SEN_2015_MACROSEN	Senegal	2015	Les maladies chroniques au Sénégal: Une écologie de la santé comparative entre Dakar et Widou Thiengoly	Community	Both	20-100	20-100	734	765	contact
SRB_1989_MONICA-NOSa	Serbia	1988-1989	MONICA, Novi Sad	Community	Urban	25-64	25-64	778	791	included in 'Survey data' tab
SRB_1994_MONICA-NOSa	Serbia	1994-1995	MONICA, Novi Sad	Community	Urban	25-64	25-64	600	670	included in 'Survey data' tab
SRB_2000_HSHN	Serbia	2000	Health Status, Health Needs and Utilization of Health Care of the Population of Serbia	National	Both	7+	7+	5079	6189	contact
SRB_2006_NHS	Serbia	2006	The 2006 National Health Survey for the Population of Serbia	National	Both	7+	7+	7888	8558	contact
SRB_2013_NHS	Serbia	2013	The National Health Survey of the Republic of Serbia, 2013	National	Both	7+	7+	7205	8140	contact
SRB_2014_citOstojic	Serbia	2013-2014	Stay Fit for Lifelong Health; the Prevalence of Lifestyle Health Conditions in Serbian Population	National	Urban	18-65		1366		contact
SYC_1989_SHS	Seychelles	1989	Seychelles Heart Survey I	National	Both	25-64	25-64	513	568	contact
SYC_1994_SHS	Seychelles	1994	Seychelles Heart Survey II	National	Both	25-64	25-64	499	563	contact
SYC_2004_SHS	Seychelles	2004	Seychelles Heart Survey III	National	Both	25-64	25-64	568	687	contact
SYC_2014_SHS	Seychelles	2013-2014	Seychelles Heart Survey IV	National	Both	25-64	25-64	531	699	contact
SLE_2008_DHS	Sierra Leone	2008	DHS	National	Both		15-49		3274	included in 'Survey data' tab
SLE_2009_STEPS	Sierra Leone	2009	STEPS	National	Both	25-64	25-64	2200	2319	included in 'Survey data' tab
SLE_2013_DHS	Sierra Leone	2013	DHS	National	Both	15-59	15-49	7037	7459	included in 'Survey data' tab
SGP_1992_NHS	Singapore	1992	National Health Survey 1992	National	Both	18-64	18-64	1743.21	1704.15	contact
SGP_1994_NUH	Singapore	1993-1995	NUH Heart Study	National	Both	26-89	26-89	498	484	contact
SGP_1998_NHS	Singapore	1998	National Health Survey 1998	National	Both	18-69	18-69	2283.74	2264.74	contact
SGP_2004_NHS	Singapore	2004	National Health Survey 2004	National	Both	18-74	18-74	2059.15	2094.5	contact
SGP_2006_FUS	Singapore	2004-2007	Combined follow up of Singapore Cardiovascular Cohort Study and Singapore Prospective Study	National	Both	24+	24+	2471	2686	contact
SGP_2009_SIHLS	Singapore	2009	Social Isolation, Health and Lifestyles Survey (SIHLS) 2009	National	Both	60+	60+	2038	2382	contact
SGP_2010_SCES	Singapore	2009-2011	The Singapore Chinese Eye Study	Community	Both	40-80	40-80	1652	1679	contact
SGP_2013_SH12	Singapore	2012-2013	Singapore Health Study 2012	National	Both	18-79	18-79	956	1026	contact
SGP_2015_SH2	Singapore	2014-2015	Singapore Health 2	National	Urban	18-80	18-80	781	970	contact
SGP_2017_SIGNS	Singapore	2016-2017	Transitions in Health, Employment, Social Engagement and Inter-generational Transfers in Singapore Study	National	Urban	60+	60+	1723	2131	contact
SVK_1993_CINDI	Slovakia	1993	Countrywide Integrated Noncommunicable Diseases Intervention Programme	National	Both	15-64	15-64	876	1293	contact
SVK_1998_CINDI	Slovakia	1998	Countrywide Integrated Noncommunicable Diseases Intervention Programme	National	Both	15-64	15-64	923	1122	contact
SVK_2003_CINDI	Slovakia	2003	Countrywide Integrated Noncommunicable Diseases Intervention Programme	National	Both	15-64	15-64	664	905	contact
SVK_2008_CINDI	Slovakia	2008	Countrywide Integrated Noncommunicable Diseases Intervention Programme	National	Both	15-64	15-64	412	584	contact
SVK_2012_EHES	Slovakia	2011-2012	European Health Examination Survey	National	Both	18-64	18-64	884	1080	contact
SVN_2014_SLOfit	Slovenia	2014	the SLOFIT monitoring system	National	Both	6-21	6-21	102790	97859	contact
SLB_2006_STEPS	Solomon Islands	2006	STEPS	Subnational	Both	15-64	15-64	1031	1375	included in 'Survey data' tab
SLB_2015_STEPS	Solomon Islands	2015	STEPS	National	Both	18-69	18-69	816	978	included in 'Survey data' tab
SLB_2004_GESOPrural	Solomon Islands	2004	A genetic-ecological study of the risk factors for lifestyle-related diseases in Oceanian populations	Community	Rural	18-74	18-74	106	109	contact
SLB_2004_GESOPurban	Solomon Islands	2004	A genetic-ecological study of the risk factors for lifestyle-related diseases in Oceanian populations	Community	Urban	18-79	18-79	91	95	contact
SLB_2010_citFURUSAWArural	Solomon Islands	2009-2010	Furusawa et al., N Z Med J 124(1333):17-28, 2011	Subnational	Rural	5+	5+	256	317	contact
SLB_2010_citFURUSAWAurban	Solomon Islands	2009-2010	Furusawa et al., N Z Med J 124(1333):17-28, 2011	Subnational	Urban	5-70	5-70	78	118	contact
SOM_2016_HARGEISA	Somalia	2016	The prevalence of selected risk factors for non-communicable diseases in Hargeisa, Somaliland: a cross-sectional study	Community	Urban	20-69	20-69	145	955	contact
ZAF_1998_DHS	South Africa	1998	DHS	National	Both	15+	15+	5645	7757	included in 'Survey data' tab
ZAF_2003_DHS	South Africa	2003	DHS	National	Both	15+	15+	3200	4497	included in 'Survey data' tab
ZAF_2008_NIDS	South Africa	2008	National Income Dynamics Study Wave I	National	Both	5+	5+	8131	10624	included in 'Survey data' tab
ZAF_2008_SAGE	South Africa	2007-2008	SAGE	National	Both	50+	50+	1541	2059	included in 'Survey data' tab
ZAF_2011_NIDS	South Africa	2010-2011	National Income Dynamics Study Wave II	National	Both	5+	5+	8383	10996	included in 'Survey data' tab
ZAF_2012_NIDS	South Africa	2012	National Income Dynamics Study Wave III	National	Both	5+	5+	10956	14118	included in 'Survey data' tab
ZAF_2015_HAALSI	South Africa	2014-2015	Health and Aging in Africa: A Longitudinal Study of an INDEPTH Community in South Africa (HAALSI)	Community	Rural	40+	40+	2141	2502	included in 'Survey data' tab
ZAF_2015_NIDS	South Africa	2014-2015	National Income Dynamics Study Wave IV	National	Both	5+	5+	13548	16775	included in 'Survey data' tab
ZAF_2016_DHS	South Africa	2016	DHS	National	Both	15-59	15-49	2807	3263	included in 'Survey data' tab
ZAF_2017_NIDS	South Africa	2017	National Income Dynamics Study Wave V	National	Both	5+	5+	13997	17688	included in 'Survey data' tab
ZAF_1989_20710010	South Africa	1989	Temple et al., Ethn Dis 11(3):431-7, 2001	Community	Both	15+	15+	457	614	contact
ZAF_1990_20710011	South Africa	1990	Steyn et al., East Afr Med J 75(1):35-40, 1998	Community	Urban	15-64	15-64	292	373	contact
ZAF_1996_20710010	South Africa	1996	Temple et al., Ethn Dis 11(3):431-7, 2001	Community	Both	15+	15+	302	406	contact
ZAF_2003_20710017	South Africa	2002-2003	SASPI	Community	Rural	35+	35+	80	275	contact
ZAF_2004_NCD	South Africa	2003-2004	Africa Centre Biomeasure Survey	Community	Rural	25-49	25-49	778	1693	contact
ZAF_2005_20710015	South Africa	2004-2006	Li et al., Curationis 30(4):79-87, 2007	Community	Both	18-40	18-40	334	270	contact
ZAF_2009_BSCS	South Africa	2008-2009	Cape Town Bellville South Cohort Study - Baseline evaluation I	Community	Urban	35-65	35-65	142	499	contact
ZAF_2010_NCD	South Africa	2010	Africa Centre Biomeasure Survey	Community	Rural	15+	15+	2933	6364	contact
ZAF_2012_SANHANES	South Africa	2012	South African National Health and Nutrition Examination Survey	National	Both	5+	5+	2274	4320	contact
KOR_1986_INTERSALT	South Korea	1986	INTERSALT	Community	Urban	20-59	20-59	100	98	included in 'Survey data' tab
KOR_1990_1410039	South Korea	1990	Korean National Blood Pressure Survey	National	Both	30+	30+	9734	12620	contact
KOR_1993_1410002	South Korea	1992-1993	Park et al., Diabetes Res Clin Pract 34 Suppl:S65-72, 1996	Subnational	Both	30-89	30+	1077	1392	contact
KOR_1998_KNHANES	South Korea	1998	Korea National Health and Nutrition Examination Survey	National	Both	10+	10+	4514	5193	contact
KOR_2001_1410063	South Korea	2001	Kim et al., Br J Psychiatry 185:102-7, 2004	Community	Both	65+	65+	300	432	contact
KOR_2001_KNHANES	South Korea	2001	Korea National Health and Nutrition Examination Survey	National	Both	5+	5+	4150	4815	contact
KOR_2003_KNHI	South Korea	2002-2003	Korean National Health Insurance	National	Both	40+	40+	2993634	2483306	contact
KOR_2005_KNHANES	South Korea	2005	Korea National Health and Nutrition Examination Survey	National	Both	5+	5+	3183	3896	contact
KOR_2005_KNHI	South Korea	2004-2005	Korean National Health Insurance	National	Both	40+	40+	3604097	3261164	contact
KOR_2007_KNHANES	South Korea	2007	Korea National Health and Nutrition Examination Survey	National	Both	5+	5+	1753	2174	contact
KOR_2007_KNHI	South Korea	2006-2007	Korean National Health Insurance	National	Both	40+	40+	4569655	4613826	contact
KOR_2008_KNHANES	South Korea	2008	Korea National Health and Nutrition Examination Survey	National	Both	5+	5+	3849	4824	contact
KOR_2009_KNHANES	South Korea	2009	Korea National Health and Nutrition Examination Survey	National	Both	5+	5+	4288	5182	contact
KOR_2009_KNHI	South Korea	2008-2009	Korean National Health Insurance	National	Both	40+	40+	5763909	6089441	contact
KOR_2010_KNHANES	South Korea	2010	Korea National Health and Nutrition Examination Survey	National	Both	5+	5+	3583	4312	contact
KOR_2010_KNSHES	South Korea	2010	Korea National School Health Examination Survey (KNSHES)	National	Both	6-20	6-20	56933	46295	contact
KOR_2011_KNHANES	South Korea	2011	Korea National Health and Nutrition Examination Survey	National	Both	5+	5+	3363	4193	contact
KOR_2011_KNHI	South Korea	2010-2011	Korean National Health Insurance	National	Both	40+	40+	6671572	7127111	contact
KOR_2012_KNHANES	South Korea	2012	Korea National Health and Nutrition Examination Survey	National	Both	5+	5+	3194	4030	contact
KOR_2013_KNHANES	South Korea	2013	Korea National Health and Nutrition Examination Survey	National	Both	5+	5+	3211	3934	contact
KOR_2013_KNHI	South Korea	2012-2013	Korean National Health Insurance	National	Both	40+	40+	7256898	7782621	contact
KOR_2014_KNHANES	South Korea	2014	Korea National Health and Nutrition Examination Survey	National	Both	5+	5+	2966	3769	contact
KOR_2015_KNHANES	South Korea	2015	Korea National Health and Nutrition Examination Survey	National	Both	5+	5+	3022	3640	contact
KOR_2015_KNHI	South Korea	2014-2015	Korean National Health Insurance	National	Both	40+	40+	7869485	8354998	contact
KOR_2016_KNHANES	South Korea	2016	Korea National Health and Nutrition Examination Survey	National	Both	5+	5+	3288	4042	contact
KOR_2017_KNHANES	South Korea	2017	Korea National Health and Nutrition Examination Survey	National	Both	5+	5+	3341	3986	contact
KOR_2017_KNHI	South Korea	2016-2017	Korean National Health Insurance	National	Both	40+	40+	8534031	9071978	contact
ESP_1985_INTERSALT-Manresa	Spain	1985	INTERSALT, Manresa	Community	Urban	20-59	20-59	100	100	included in 'Survey data' tab
ESP_1986_INTERSALT-Torrejo	Spain	1986	INTERSALT, Torrejo	Community	Urban	20-59	20-59	100	100	included in 'Survey data' tab
ESP_1987_MONICA-CATa	Spain	1986-1988	MONICA, Catalonia	Subnational	Both	25-64	25-64	1251	1271	included in 'Survey data' tab
ESP_1991_MONICA-CATa	Spain	1990-1992	MONICA, Catalonia	Subnational	Both	25-64	25-64	1719	1191	included in 'Survey data' tab
ESP_1995_MONICA-CATa	Spain	1994-1996	MONICA, Catalonia	Subnational	Both	25-64	25-64	1800	1628	included in 'Survey data' tab
ESP_1989_CAT	Spain	1989	Cardiovascular Risk Factors Study in Catalonia	Subnational	Both	15+	15+	330	375	contact
ESP_1990_Cardiova	Spain	1990	Banegas et al., Hypertension 32(6):998-1002, 1998	National	Both	35-65	35-65	810	1203	contact
ESP_1992_10724008	Spain	1992	CINDI	Subnational	Both	25-64	25-64	1194	1454	contact
ESP_1992_10724137	Spain	1989-1994	SEEDO	Subnational	Both	25-60	25-60	2533	2855	contact
ESP_1992_10724462	Spain	1992	ENCAT	Community	Both	15-80	15-80	786	952	contact
ESP_1992_CVDRF	Spain	1991-1993	Encuesta de Factores de Riesgo Cardiovascular en la Región de Murcia (Cardiovascular Risk Factors Survey)	Subnational	Both	18-69	18-69	1512	1562	contact
ESP_1995_10724138	Spain	1990-2000	SEEDO	Subnational	Both	25-60	25-60	4707	5178	contact
ESP_1995_ENCV	Spain	1994-1995	Encuesta de Nutrición y Salud Comunidad Valenciana 1994-95 (ENCV)	Subnational	Urban	15+	15+	830	959	contact
ESP_1996_10724110	Spain	1996	Guía Study	Community	Urban	30+	30+	305	384	contact
ESP_1997_10724113	Spain	1997	Soriguer et al., Eur J Epidemiol 19(1):33-40, 2004	Community	Rural	18-65	18-65	613	613	contact
ESP_1999_10724457	Spain	1996-2002	Castells et al., J Epidemiol Community Health 60(4):316-21, 2006	Community	Urban		50-69		26963	contact
ESP_1999_EnKID	Spain	1998-2000	EnKID study	National	Both	5-24	5-24	1452	1730	contact
ESP_2000_10724458	Spain	1999-2000	ENIB	Community	Both	20-60	20-60	498	702	contact
ESP_2000_CORSAIB	Spain	1999-2000	Factores de riesgo en las islas Baleares: Estudio CORSAIB	Subnational	Both	35-74	35-74	811	864	contact
ESP_2001_Ancianos	Spain	2000-2001	Regidor et al., J Hum Hypertens 20(1):73-82, 2006	National	Both	60+	60+	1318	2281	contact
ESP_2001_EUREYE	Spain	2000-2001	EUREYE Study	Subnational	Both	65+	65+	274	324	contact
ESP_2002_CHIS	Spain	2001-2002	Catalan Health Interview Survey	Subnational	Both	18-74	18-74	597	745	contact
ESP_2002_DINO	Spain	2001-2003	DIabetes, Nutrición y Obesidad en la población adulta de la Región de Murcia (DINO)	Subnational	Both	20+	20+	715	828	contact
ESP_2003_10724463	Spain	2002-2003	ENCAT	Community	Both	15-80	15-80	712	813	contact
ESP_2003_CDC	Spain	2000-2005	CDC of the Canary Islands	Subnational	Both	18-75	18-75	2878	3719	contact
ESP_2003_EMAS	Spain	2003	The European Male Ageing Study	Community	Both	40+		405		contact
ESP_2004_citVIOQUE	Spain	2004	Vioque J et al. Obesity 16:664-70, 2008	Community	Urban	24+	24+	87	115	contact
ESP_2004_RECCyL	Spain	2004	Cardiovascular Risk Study in Castilla y León (RECCyL)	Subnational	Both	15+	15+	1903	2077	contact
ESP_2004_REGICOR	Spain	2003-2005	Registre Gironi del Cor (REGICOR)	Subnational	Both	35-79	35-79	2951	3266	contact
ESP_2005_PREVICTUS	Spain	2004-2006	PREVICTUS	National	Both	60+	60+	3193	3640	contact
ESP_2008_EMAS	Spain	2008	The European Male Ageing Study	Community	Both	40+		272		contact
ESP_2008_HERMEX	Spain	2007-2009	Harmonizing Equation of Risk in Mediterraneon countries Extremadura	Subnational	Both	25-79	25-79	1298	1498	contact
ESP_2009_ENRICA	Spain	2008-2010	Study on Nutrition and Cardiovascular Risk in Spain	National	Both	18+	18+	5756	6397	contact
ESP_2009_RECCyL	Spain	2009	Cardiovascular Risk Study in Castilla y León (RECCyL)	Subnational	Both	20+	20+	1315	1590	contact
ESP_2013_ANIBES	Spain	2013	ANIBES Study	National	Both	9-75	9-75	1160	1125	contact
ESP_2014_RECCyL	Spain	2014	Cardiovascular Risk Study in Castilla y León (RECCyL)	Subnational	Both	20+	20+	1215	1475	contact
ESP_2015_ENRICA	Spain	2015	Study on Nutrition and Cardiovascular Risk in Spain (ENRICA)	National	Both	65+	65+	711	770	contact
LKA_2006_STEPS	Sri Lanka	2006	STEPS	National	Both	15-64	15-64	6140	6213	included in 'Survey data' tab
LKA_2014_STEPS	Sri Lanka	2014	STEPS	National	Both	18-69	18-69	1863	2893	included in 'Survey data' tab
LKA_2003_5144069	Sri Lanka	2003	Wijewardene et al., Ceylon Med J 50:62-70, 2005	Subnational	Both	30-65	30-65	275	296	contact
LKA_2003_5144070	Sri Lanka	2003	Wijewardene et al., Ceylon Med J 50:62-70, 2005	Subnational	Both	30-65	30-65	139	192	contact
LKA_2003_5144071	Sri Lanka	2003	Wijewardene et al., Ceylon Med J 50:62-70, 2005	Subnational	Both	30-65	30-65	1891	2410	contact
LKA_2003_5144072	Sri Lanka	2003	Wijewardene et al., Ceylon Med J 50:62-70, 2005	Subnational	Both	30-65	30-65	387	457	contact
LKA_2007_DHS	Sri Lanka	2006-2007	DHS	National	Both		15-49		12539	contact
SDN_2016_STEPS	Sudan	2016	STEPS	National	Both	18-69	18-69	2661	4544	included in 'Survey data' tab
SDN_2005_STEPS	Sudan	2005	STEPS	Subnational	Both	25-64	25-64	626	881	contact
SUR_2014_HELISUR	Suriname	2013-2015	The Healthy Life in Suriname Study (HELISUR)	Subnational	Urban	18-70	18-70	424	722	contact
SWZ_2007_DHS	Swaziland	2006-2007	DHS	National	Both	15-49	15-49	4074	4714	included in 'Survey data' tab
SWZ_2007_STEPS	Swaziland	2007	STEPS	National	Both	25-64	25-64	433	827	included in 'Survey data' tab
SWZ_2014_STEPS	Swaziland	2014	STEPS	National	Both	15-69	15-69	1102	1976	included in 'Survey data' tab
SWE_1985_MONICAgothenburg	Sweden	1985	MONICA Gothenburg	Community	Urban	25-64	25-64	666	702	included in 'Survey data' tab
SWE_1986_MONICA	Sweden	1986	MONICA Northern Sweden	Subnational	Both	25-64	25-64	822	798	included in 'Survey data' tab
SWE_1990_MONICA	Sweden	1990	MONICA Northern Sweden	Subnational	Both	25-64	25-64	773	806	included in 'Survey data' tab
SWE_1990_MONICAgothenburg	Sweden	1990	MONICA Gothenburg	Community	Urban	25-64	25-64	775	775	included in 'Survey data' tab
SWE_1994_MONICA	Sweden	1994	MONICA Northern Sweden	Subnational	Both	25-74	25-74	940	961	included in 'Survey data' tab
SWE_1995_MONICAgothenburg	Sweden	1995	MONICA Gothenburg	Community	Urban	25-64	25-64	745	867	included in 'Survey data' tab
SWE_1987_10752442	Sweden	1985-1989	Västerbotten Intervention Project	Subnational	Both	25-64	25-64	1676	1554	contact
SWE_1991_10752442	Sweden	1990-1992	Västerbotten Intervention Project	Subnational	Both	25-64	25-64	7263	7804	contact
SWE_1992_EPICumea	Sweden	1985-1996	EPIC Umea	Subnational	Both	24-72	24-72	12359	13217	contact
SWE_1992_PSWG	Sweden	1992-1993	Population Study of Women in Gothenburg	Community	Urban		62-84		802	contact
SWE_1993_ULSAM	Sweden	1991-1995	Uppsala Longitudinal Study of Adult Men	Community	Both	70		1215		contact
SWE_1994_10752442	Sweden	1993-1995	Västerbotten Intervention Project	Subnational	Both	25-64	25-64	9804	10727	contact
SWE_1994_HP	Sweden	1994	Helicobacter Pylori	Community	Urban	56-65	56-65	170	217	contact
SWE_1994_MDC	Sweden	1991-1996	Malmö Diet and Cancer	Community	Urban	45-73	45-73	12096	18293	contact
SWE_1997_10752442	Sweden	1996-1998	Västerbotten Intervention Project	Subnational	Both	25-64	25-64	8327	8893	contact
SWE_1999_MONICA	Sweden	1999	MONICA Northern Sweden	Subnational	Both	25-74	25-74	889	920	contact
SWE_1999_ULSAM	Sweden	1997-2001	Uppsala Longitudinal Study of Adult Men	Community	Both	77		783		contact
SWE_2000_10752444	Sweden	1998-2001	The Kalixanda study	Community	Both	20+	20+	508	483	contact
SWE_2001_10752442	Sweden	1999-2003	Västerbotten Intervention Project	Subnational	Both	25-64	25-64	6354	6384	contact
SWE_2001_10752508	Sweden	2000-2001	H70 Study	Community	Urban	70	70	242	270	contact
SWE_2003_EMAS	Sweden	2003	The European Male Ageing Study	Community	Both	40+		396		contact
SWE_2003_INTERGENE	Sweden	2001-2004	Swedish INTERGENE Cohort Study	Subnational	Both	24-76	24-76	1694	1906	contact
SWE_2003_PIVUS70	Sweden	2001-2004	Prospective Investigation of the Vasculature in Uppsala Seniors (PIVUS)	Community	Both	70	70	507	509	contact
SWE_2004_10752128	Sweden	2003-2004	Welin et al., BMC Public Health 8:403, 2008	Community	Urban	50	50	595	655	contact
SWE_2004_10752129	Sweden	2003-2004	Welin et al., BMC Public Health 8:403, 2008	Community	Urban	60		667		contact
SWE_2004_MONICA	Sweden	2004	MONICA Northern Sweden	Subnational	Both	26-75	26-75	926	964	contact
SWE_2005_EYHS	Sweden	2004-2005	European Youth Heart Study (EYHS) II	Subnational	Urban	15-21	15-21	196	262	contact
SWE_2005_PSWG	Sweden	2004-2005	Population Study of Women in Gothenburg	Community	Urban		38-50		494	contact
SWE_2006_10752508	Sweden	2005-2006	H70 Study	Community	Urban	75	75	320	422	contact
SWE_2008_EMAS	Sweden	2008	The European Male Ageing Study	Community	Both	40+		353		contact
SWE_2008_PIVUS75	Sweden	2006-2009	Prospective Investigation of the Vasculature in Uppsala Seniors (PIVUS)	Community	Both	75	75	407	419	contact
SWE_2009_MONICA	Sweden	2009	MONICA Northern Sweden	Subnational	Both	25-74	25-74	849	857	contact
SWE_2013_EpiHealth	Sweden	2011-2014	EpiHealth	National	Both	45-75	45-75	4731	6054	contact
SWE_2014_MONICA	Sweden	2014	MONICA Northern Sweden	Subnational	Both	25-74	25-74	753	795	contact
SWE_2015_intergene13yrs	Sweden	2014-2016	Swedish INTERGENE Cohort Study	Subnational	Urban	37-88	37-88	602	653	contact
SWE_2017_PSWG	Sweden	2016-2017	Population Study of Women in Gothenburg	Community	Urban		38-50		570	contact
CHE_1985_MONICA	Switzerland	1984-1986	The Swiss MONICA Study Wave I	Subnational	Both	25-74	25-74	1744	1689	included in 'Survey data' tab
CHE_1989_MONICA	Switzerland	1988-1989	The Swiss MONICA Study Wave II	Subnational	Both	25-74	25-74	1778	1684	included in 'Survey data' tab
CHE_1993_MONICA	Switzerland	1992-1993	The Swiss MONICA Study Wave III	Subnational	Both	25-74	25-74	1577	1672	included in 'Survey data' tab
CHE_2004_CON	Switzerland	2004	The Swiss Conscription Database	National	Both	18-20		20491		contact
CHE_2005_CoLaus	Switzerland	2003-2006	Cohorte Lausannoise	Community	Urban	35-75	35-75	3186	3536	contact
CHE_2005_CON	Switzerland	2005	The Swiss Conscription Database	National	Both	18-20		32131		contact
CHE_2006_CON	Switzerland	2006	The Swiss Conscription Database	National	Both	18-20		34530		contact
CHE_2007_CON	Switzerland	2007	The Swiss Conscription Database	National	Both	18-20		36194		contact
CHE_2008_CON	Switzerland	2008	The Swiss Conscription Database	National	Both	18-20		34497		contact
CHE_2009_CON	Switzerland	2009	The Swiss Conscription Database	National	Both	18-20		34896		contact
CHE_2010_BSS	Switzerland	2007-2012	Bus Santé Study	Subnational	Urban	20-80	20-80	1884	1911	contact
CHE_2010_CON	Switzerland	2010	The Swiss Conscription Database	National	Both	18-20		37214		contact
CHE_2011_CoLaus	Switzerland	2009-2012	Cohorte Lausannoise	Community	Urban	40-81	40-81	2176	2494	contact
CHE_2011_CON	Switzerland	2011	The Swiss Conscription Database	National	Both	18-20		38108		contact
CHE_2012_CON	Switzerland	2012	The Swiss Conscription Database	National	Both	18-20		36938		contact
CHE_2013_CON	Switzerland	2013	The Swiss Conscription Database	National	Both	18-20		32890		contact
CHE_2014_CON	Switzerland	2014	The Swiss Conscription Database	National	Both	18-20		32691		contact
CHE_2015_BSS	Switzerland	2013-2016	Bus Santé Study	Subnational	Urban	20-74	20-74	2022	2186	contact
CHE_2015_CON	Switzerland	2015	The Swiss Conscription Database	National	Both	18-20		32616		contact
CHE_2016_CoLaus	Switzerland	2014-2017	Cohorte Lausannoise	Community	Urban	45-87	45-87	2008	2473	contact
SYR_2002_NSNCD	Syrian Arab Republic	2002	National survey on non-communicable diseases and factors affecting their development	National	Both	15-64	15-64	3155	4045	contact
TWN_1985_INTERSALT	Taiwan	1985	INTERSALT	Community	Rural	20-59	20-59	89	92	included in 'Survey data' tab
TWN_1995_NAHSIT	Taiwan	1993-1996	Nutrition and Health Survey in Taiwan 1993-1996	National	Both	5+	5+	2959	3216	included in 'Survey data' tab
TWN_2000_NAHSIT	Taiwan	1999-2000	Nutrition and Health Survey in Taiwan 1999-2000	National	Both	65+	65+	1271	1202	included in 'Survey data' tab
TWN_2007_NAHSIT	Taiwan	2005-2008	Nutrition and Health Survey in Taiwan 2005-2008	National	Both	19+	19+	1311	1355	included in 'Survey data' tab
TWN_2015_NAHSIT	Taiwan	2013-2016	Nutrition and Health Survey in Taiwan	National	Both	5+	5+	2556	2672	included in 'Survey data' tab
TWN_1990_3158080	Taiwan	1989-1991	Chiu et al., J Gerontol A Biol Sci Med Sci 55(11):M684-90, 2000	Subnational	Both	65+	65+	1322	1308	contact
TWN_1994_APCSC-KINDS	Taiwan	1993-1994	The Kinmen Neurological Disorders Survey	Community	Urban	50+	50+	672	593	contact
TWN_2000_SEBAS	Taiwan	2000	Social Environment and Biomarkers of Aging Study	National	Both	50+	50+	590	433	contact
TWN_2005_3158091	Taiwan	2004-2005	TCHS	Community	Urban	40+	40+	1147	1212	contact
TWN_2006_SEBAS	Taiwan	2006	Social Environment and Biomarkers of Aging Study	National	Both	53+	53+	548	476	contact
TWN_2007_TSHHH	Taiwan	2007	Taiwanese Survey on Hypertension, Hyperglycemia and Hyperlipidemia	National	Both	20+	20+	2155	2469	contact
TJK_2012_DHS	Tajikistan	2012	DHS	National	Both		15-49		8930	included in 'Survey data' tab
TJK_2016_STEPS	Tajikistan	2016	STEPS	National	Both	18-69	18-69	1091	1553	included in 'Survey data' tab
TJK_2017_DHS	Tajikistan	2017	DHS	National	Both		15-49		9922	included in 'Survey data' tab
TJK_2003_MSS	Tajikistan	2003	Micronutrient Status Survey	National	Both		15-49		2044	contact
TZA_1992_DHS	Tanzania	1991-1992	DHS	National	Both		20-49		4039	included in 'Survey data' tab
TZA_1996_DHS	Tanzania	1996	DHS	National	Both		20-49		3512	included in 'Survey data' tab
TZA_2005_DHS	Tanzania	2004-2005	DHS	National	Both		15-49		9160	included in 'Survey data' tab
TZA_2010_DHS	Tanzania	2010	DHS	National	Both		15-49		9099	included in 'Survey data' tab
TZA_2011_STEPS	Tanzania	2011	STEPS	Subnational	Both	25-64	25-64	1008	1517	included in 'Survey data' tab
TZA_2012_STEPS	Tanzania	2012	STEPS	National	Both	25-64	25-64	2581	2827	included in 'Survey data' tab
TZA_2016_DHS	Tanzania	2015-2016	DHS	National	Both		15-49		12036	included in 'Survey data' tab
TZA_1997_19834011	Tanzania	1996-1997	Aspray et al., Trans R Soc Trop Med Hyg 94:637-44, 2000	Community	Rural	15+	15+	251	324	contact
TZA_1997_19834018	Tanzania	1996-1997	Aspray et al., Trans R Soc Trop Med Hyg 94:637-44, 2000	Community	Urban	15+	15+	117	118	contact
TZA_1999_citBovet	Tanzania	1998-1999	Bovet et al., Int J Epidemiol 31(1):240-7, 2002	Community	Urban	25-64	25-64	3593	5646	contact
TZA_2014_DUCS	Tanzania	2014	Dar es Salaam Urban Cohort Hypertension Study	Community	Urban	40+	40+	965	1266	contact
THA_1987_5764002	Thailand	1987	INCLEN	Community	Rural	35-65		244		contact
THA_1989_5764003	Thailand	1989	INCLEN	Community	Rural	35-65		209		contact
THA_1989_5764004	Thailand	1989	INCLEN	Community	Urban	35-65		207		contact
THA_1991_NHES	Thailand	1991	Thailand National Health Examination Survey I	National	Both	5+	5+	8698	11027	contact
THA_1995_NNS	Thailand	1995	The Fourth National Nutrition Survey of Thailand- 1995	National	Both	20-60	20-60	1405	3631	contact
THA_1997_NHES	Thailand	1997	Thailand National Health Examination Survey II	National	Both	5-59	5-59	4117	4876	contact
THA_2000_interASIA	Thailand	2000	InterASIA	National	Both	35+	35+	2092	3211	contact
THA_2004_NHES	Thailand	2004	Thailand National Health Examination Survey III	National	Both	15+	15+	18819	20143	contact
THA_2004_NNST	Thailand	2003-2004	The Fifth National Nutrition Survey of Thailand	National	Both	19+	19+	1961	3366	contact
THA_2009_NHESIV	Thailand	2009	Thailand National Health Examination Survey IV	National	Both	5+	5+	12972	13848	contact
TLS_2010_DHS	Timor-Leste	2009-2010	DHS	National	Both		15-49		11983	included in 'Survey data' tab
TLS_2014_STEPS	Timor-Leste	2014	STEPS	National	Both	18-69	18-69	1048	1437	included in 'Survey data' tab
TLS_2016_DHS	Timor-Leste	2016	DHS	National	Both	15-59	15-49	4556	11823	included in 'Survey data' tab
TLS_2010_TLEHS	Timor-Leste	2009-2010	Timor-Leste Eye Health Survey	Subnational	Both	40+	40+	245	247	contact
TGO_1998_DHS	Togo	1998	DHS	National	Both		20-49		3114	included in 'Survey data' tab
TGO_2010_STEPS	Togo	2010	STEPS	National	Both	15-64	15-64	2063	2095	included in 'Survey data' tab
TGO_2014_DHS	Togo	2013-2014	DHS	National	Both		15-49		4398	included in 'Survey data' tab
TGO_2014_CT	Togo	2014	Impact evaluation of a cash transfer program in North Togo	Subnational	Rural		20-65		3588	contact
TKL_2005_STEPS	Tokelau	2005	STEPS	National	Both	15-64	15-64	270	296	included in 'Survey data' tab
TKL_2014_STEPS	Tokelau	2014	STEPS	National	Both	18-64	18-64	261	276	included in 'Survey data' tab
TON_2004_STEPS	Tonga	2004	STEPS	National	Both	15-64	15-64	403	552	included in 'Survey data' tab
TON_2011_STEPS	Tonga	2011	STEPS	National	Both	15-64	15-64	878	1401	included in 'Survey data' tab
TON_2008_OPIC-MYP	Tonga	2007-2008	Pacific Obesity Prevention in Communities - Ma’alahi Youth Project	Subnational	Rural	13-22	13-22	434	579	contact
TTO_1985_INTERSALT	Trinidad and Tobago	1985	INTERSALT	Community	Urban	20-59	20-59	84	92	included in 'Survey data' tab
TTO_2001_AdultSurvey	Trinidad and Tobago	2001	Adult Survey	National	Rural	25+	25+	198	267	contact
TUN_1997_AHP	Tunisia	1996-1997	Ariana Healthy Project 1997	Community	Both	35-65	35-65	2664	2711	contact
TUN_1997_TNNS	Tunisia	1996-1997	Tunisian National Nutrition Survey 1996-1997	National	Both	5+	5+	2724	4125	contact
TUN_2005_TAHINA	Tunisia	2005	Tunisian National Survey	National	Both	35-71	35-71	3417	4590	contact
TUN_2010_ObeMaghreb	Tunisia	2009-2010	ObeMaghreb	Subnational	Urban	5-49	5-49	1841	1601	contact
TUR_1993_DHS	Turkey	1993	DHS	National	Both		20-49		2294	included in 'Survey data' tab
TUR_1998_DHS	Turkey	1998	DHS	National	Both		20-49		2210	included in 'Survey data' tab
TUR_2003_DHS	Turkey	2003	DHS	National	Both		20-49		2934	included in 'Survey data' tab
TUR_2008_DHS	Turkey	2008	DHS	National	Both		15-49		6167	included in 'Survey data' tab
TUR_2013_DHS	Turkey	2013	DHS	National	Both		15-49		8270	included in 'Survey data' tab
TUR_2017_STEPS	Turkey	2017	STEPS	National	Both	15+	15+	2306	3426	included in 'Survey data' tab
TUR_1990_TARF	Turkey	1990	Turkish Adult Risk Factor Study	National	Both	20+	20+	1338	1369	contact
TUR_1995_TARF	Turkey	1995	Turkish Adult Risk Factor Study	National	Both	25+	25+	855	878	contact
TUR_1998_TARF	Turkey	1998	Turkish Adult Risk Factor Study	National	Both	28+	28+	877	909	contact
TUR_1999_15792018	Turkey	1998-1999	Erem et al., Diabetes Res Clin Pract 54(3):203-08, 2001	Community	Urban	20+	20+	1324	1322	contact
TUR_2000_15792084	Turkey	2000	MDHS	Subnational	Urban		15-49		1420	contact
TUR_2000_TARF	Turkey	2000	Turkish Adult Risk Factor Study	National	Both	30+	30+	890	938	contact
TUR_2001_15792045	Turkey	2001	Yumuk et al., Diabetes Res Clin Pract 70(2):151-58, 2005	Community	Urban	20+	20+	1042	1789	contact
TUR_2001_15792055	Turkey	2000-2002	The Healthy Nutrition for Healthy Heart Study	National	Both	25-84	25-84	4718	10631	contact
TUR_2002_15792106	Turkey	2002	Onal et al., Blood Press 13(1):31-6, 2004	Subnational	Urban	25+	25+	67	355	contact
TUR_2002_TARF	Turkey	2001-2002	Turkish Adult Risk Factor Study	National	Both	32+	32+	1098	1209	contact
TUR_2003_PatenT	Turkey	2003	Prevalence, awareness, treatment and control of hypertension in Turkey in 2003	National	Both	18+	18+	1988	2847	contact
TUR_2004_NRCS	Turkey	2004	Nationally Representative Cross-sectional Survey	National	Both	20+	20+	2110	2154	contact
TUR_2004_TARF	Turkey	2003-2004	Turkish Adult Risk Factor Study	National	Both	34+	34+	1097	1130	contact
TUR_2004_TRAB	Turkey	2003-2005	Prevalence of prehypertension and associated risk factors among Turkish adults: Trabzon Hypertension Study	Subnational	Both	20+	20+	2208	2601	contact
TUR_2006_TARF	Turkey	2005-2006	Turkish Adult Risk Factor Study	National	Both	35+	35+	965	1029	contact
TUR_2007_NHS	Turkey	2007	Natinal Household survey	National	Both	20-85	20-85	2263	1842	contact
TUR_2008_TARF	Turkey	2007-2008	Turkish Adult Risk Factor Study	National	Both	37+	37+	1048	1070	contact
TUR_2010_TARF	Turkey	2009-2010	Turkish Adult Risk Factor Study	National	Both	39+	39+	462	501	contact
TUR_2011_CDRFS	Turkey	2011	Chronic Diseases and Risk Factors Survey in Turkey	National	Both	15+	15+	8061	8923.68	contact
TUR_2011_TRAB	Turkey	2009-2012	Prevalence of diabetes and associated risk factors among adult population in Trabzon city	Subnational	Both	20+	20+	1570	2124	contact
TUR_2013_TARF	Turkey	2012-2013	Turkish Adult Risk Factor Study	National	Both	37+	37+	1012	1087	contact
TUR_2015_TARF	Turkey	2014-2015	Turkish Adult Risk Factor Study	National	Both	44+	44+	437	484	contact
TKM_2013_STEPS	Turkmenistan	2013	STEPS	National	Both	18-64	18-64	1879	2741	included in 'Survey data' tab
TKM_2018_STEPS	Turkmenistan	2018	STEPS	National	Both	18-69	18-69	1713	2236	included in 'Survey data' tab
TKM_2000_DHS	Turkmenistan	2000	DHS	National	Both		15-49		2084	contact
TUV_2015_STEPS	Tuvalu	2015	STEPS	National	Both	18-69	18-69	478	550	included in 'Survey data' tab
UGA_1995_DHS	Uganda	1995	DHS	National	Both		20-49		2831	included in 'Survey data' tab
UGA_2001_DHS	Uganda	2000-2001	DHS	National	Both		15-49		5829	included in 'Survey data' tab
UGA_2006_DHS	Uganda	2006	DHS	National	Both	15-54	15-49	2475	2538	included in 'Survey data' tab
UGA_2011_DHS	Uganda	2011	DHS	National	Both	15-54	15-49	2361	2501	included in 'Survey data' tab
UGA_2014_STEPS	Uganda	2014	STEPS	National	Both	18-69	18-69	1560	2120	included in 'Survey data' tab
UGA_2016_DHS	Uganda	2016	DHS	National	Both	15-54	15-54	5191	5415	included in 'Survey data' tab
UGA_2012_Gulu	Uganda	2011-2013	Gulu Health and Demographic Surveillance Site (HDSS)	Community	Rural	5+	5+	3938	4820	contact
UGA_2012_NCDS	Uganda	2011-2012	The Prevalence and Distribution of Non-communicable Diseases and Their Risk Factors in Kasese District, Uganda	Subnational	Both	25-79	25-79	277	221	contact
UGA_2015_Gulu	Uganda	2014-2015	Gulu Health and Demographic Surveillance Site (HDSS)	Community	Rural	15-24	15-24	671	517	contact
UKR_2019_STEPS	Ukraine	2019	STEPS	National	Both	18-69	18-69	1569	2600	included in 'Survey data' tab
UKR_2002_NMNS	Ukraine	2002	National Micronutrient Survey	National	Both		15-50		816	contact
ARE_2018_STEPS	United Arab Emirates	2017-2018	STEPS	National	Both	18+	18+	2148	2324	included in 'Survey data' tab
ARE_1990_15784100	United Arab Emirates	1989-1990	el Mugamer et al., J Trop Med Hyg 98(6):407-15, 1995	Community	Both	20+	20+	123	199	contact
ARE_2000_ENDCAD	United Arab Emirates	1999-2000	Emirates National Diabetes and Coronary Artery Disease Risk Factor Study	National	Both	20-80	20-80	2822	3743	contact
ARE_2001_15784034	United Arab Emirates	2000-2001	Carter et al., J Health Popul Nutr 22(1):75-83, 2004	Community	Both		20-79		521	contact
ARE_2009_WHS	United Arab Emirates	2009	Gulf Cooperation Council World Health Survey	National	Both	18+	18+	605	645	contact
GBR_1985_INTERSALT-Belfast	United Kingdom	1985-1986	INTERSALT, Belfast	Community	Urban	20-59	20-59	99	100	included in 'Survey data' tab
GBR_1985_INTERSALT-Birmingham	United Kingdom	1985	INTERSALT, Birmingham	Community	Urban	20-59	20-59	100	100	included in 'Survey data' tab
GBR_1985_INTERSALT-Wales	United Kingdom	1985	INTERSALT, Wales	Community	Urban	20-59	20-59	100	99	included in 'Survey data' tab
GBR_1985_SHHS	United Kingdom	1984-1986	Scottish Heart Health Survey	Subnational	Both	40-59	40-59	4364	4465	included in 'Survey data' tab
GBR_1987_DNS	United Kingdom	1986-1987	Dietary and Nutritional Survey of British Adults 1986-1987	National	Both	16-64	16-64	1158	1161	included in 'Survey data' tab
GBR_1987_MONICA-BELa	United Kingdom	1986-1987	MONICA, Belfast	Subnational	Both	25-64	25-64	1155	1185	included in 'Survey data' tab
GBR_1989_NSHD	United Kingdom	1989	MRC National Survey of Health and Development	National	Both	42-44	42-44	1617	1608	included in 'Survey data' tab
GBR_1991_NCDS	United Kingdom	1991	National Child Development Study (1958 British Cohort Study)	National	Both	33	33	5426	5605	included in 'Survey data' tab
GBR_1992_HSE	United Kingdom	1991-1992	Health Survey for England	National	Both	16+	16+	3114	3430	included in 'Survey data' tab
GBR_1992_MONICA-BELa	United Kingdom	1991-1992	MONICA, Belfast	Subnational	Both	25-64	25-64	998	996	included in 'Survey data' tab
GBR_1992_MONICA-GLAa	United Kingdom	1992	MONICA, Glasgow	Community	Urban	25-64	25-64	696	775	included in 'Survey data' tab
GBR_1993_HSE	United Kingdom	1993	Health Survey for England	National	Both	16+	16+	7461	8297	included in 'Survey data' tab
GBR_1994_HSE	United Kingdom	1994	Health Survey for England	National	Both	16+	16+	6825	7939	included in 'Survey data' tab
GBR_1995_HSE	United Kingdom	1995	Health Survey for England	National	Both	5+	5+	8038	9027	included in 'Survey data' tab
GBR_1995_MONICA-GLAa	United Kingdom	1995	MONICA, Glasgow	Community	Urban	25-64	25-64	855	958	included in 'Survey data' tab
GBR_1995_NDNS	United Kingdom	1994-1995	National Diet and Nutrition Survey (NDNS)	National	Both	65+	65+	701	687	included in 'Survey data' tab
GBR_1995_SHS	United Kingdom	1995	Scottish Health Survey (SHeS)	Subnational	Both	16-64	16-64	3303	4005	included in 'Survey data' tab
GBR_1996_BCS70	United Kingdom	1996	British Cohort Study 1970	National	Both	26	26	81	78	included in 'Survey data' tab
GBR_1996_HSE	United Kingdom	1996	Health Survey for England	National	Both	5+	5+	8469	9461	included in 'Survey data' tab
GBR_1997_HSE	United Kingdom	1997	Health Survey for England	National	Both	5+	5+	6285	6841	included in 'Survey data' tab
GBR_1998_HSE	United Kingdom	1998	Health Survey for England	National	Both	5+	5+	7980	9047	included in 'Survey data' tab
GBR_1998_INTERMAP-Belfast	United Kingdom	1998-1999	INTERMAP, Belfast	Community	Urban	40-59	40-59	125	97	included in 'Survey data' tab
GBR_1998_INTERMAP-WestBromwich	United Kingdom	1997-1999	INTERMAP, WestBromwich	Community	Urban	40-59	40-59	141	138	included in 'Survey data' tab
GBR_1998_SHS	United Kingdom	1998	Scottish Health Survey (SHeS)	Subnational	Both	5-74	5-74	5047	5908	included in 'Survey data' tab
GBR_1999_HSE	United Kingdom	1999	Health Survey for England	National	Both	5+	5+	3880	4304	included in 'Survey data' tab
GBR_1999_NSHD	United Kingdom	1999	MRC National Survey of Health and Development	National	Both	53-54	53-54	1452	1496	included in 'Survey data' tab
GBR_2000_HSE	United Kingdom	2000	Health Survey for England	National	Both	5+	5+	4073	4607	included in 'Survey data' tab
GBR_2001_HSE	United Kingdom	2001	Health Survey for England	National	Both	5+	5+	7463	8657	included in 'Survey data' tab
GBR_2001_NDNS	United Kingdom	2000-2001	National Diet and Nutrition Survey 2000-2001	National	Both	19-64	19-64	807	973	included in 'Survey data' tab
GBR_2002_HSE	United Kingdom	2002	Health Survey for England	National	Both	5+	5+	6797	7578	included in 'Survey data' tab
GBR_2003_HSE	United Kingdom	2003	Health Survey for England	National	Both	5+	5+	7136	8268	included in 'Survey data' tab
GBR_2003_SHS	United Kingdom	2003	Scottish Health Survey (SHeS)	Subnational	Both	5+	5+	3988	4687	included in 'Survey data' tab
GBR_2004_HSE	United Kingdom	2004	Health Survey for England	National	Both	5+	5+	2975	3608	included in 'Survey data' tab
GBR_2005_ELSA	United Kingdom	2004-2005	English Longitudinal Study of Ageing Wave 2 2004-2005	National	Both	52+	52+	3259	3966	included in 'Survey data' tab
GBR_2005_HSE	United Kingdom	2005	Health Survey for England	National	Both	5+	5+	4839	5503	included in 'Survey data' tab
GBR_2006_HSE	United Kingdom	2006	Health Survey for England	National	Both	5+	5+	8005	8912	included in 'Survey data' tab
GBR_2007_HSE	United Kingdom	2007	Health Survey for England	National	Both	5+	5+	5354	5708	included in 'Survey data' tab
GBR_2008_HSE	United Kingdom	2008	Health Survey for England	National	Both	5+	5+	8317	9472	included in 'Survey data' tab
GBR_2008_SHS	United Kingdom	2008	Scottish Health Survey (SHeS)	Subnational	Both	5+	5+	2970	3533	included in 'Survey data' tab
GBR_2009_ELSA	United Kingdom	2008-2009	English Longitudinal Study of Ageing Wave 4 2008-2009	National	Both	50+	50+	3540	4296	included in 'Survey data' tab
GBR_2009_HSE	United Kingdom	2009	Health Survey for England	National	Both	5+	5+	3242	3384	included in 'Survey data' tab
GBR_2009_NSHD	United Kingdom	2006-2010	MRC National Survey of Health and Development	National	Both	60-65	60-65	1061	1156	included in 'Survey data' tab
GBR_2009_SHS	United Kingdom	2009	Scottish Health Survey (SHeS)	Subnational	Both	5+	5+	3621	4168	included in 'Survey data' tab
GBR_2010_HSE	United Kingdom	2010	Health Survey for England	National	Both	5+	5+	4959	5547	included in 'Survey data' tab
GBR_2010_NDNS	United Kingdom	2008-2012	National Diet and Nutrition Survey (NDNS)	National	Both	5+	5+	2580	3094	included in 'Survey data' tab
GBR_2010_SHS	United Kingdom	2010	Scottish Health Survey (SHeS)	Subnational	Both	5+	5+	3206	3767	included in 'Survey data' tab
GBR_2011_HSE	United Kingdom	2011	Health Survey for England	National	Both	5+	5+	3680	4404	included in 'Survey data' tab
GBR_2011_SHS	United Kingdom	2011	Scottish Health Survey (SHeS)	Subnational	Both	5+	5+	3253	3862	included in 'Survey data' tab
GBR_2012_HSE	United Kingdom	2012	Health Survey for England	National	Both	5+	5+	3648	4278	included in 'Survey data' tab
GBR_2012_SHS	United Kingdom	2012	Scottish Health Survey (SHeS)	Subnational	Both	5+	5+	2378	2734	included in 'Survey data' tab
GBR_2013_ELSA	United Kingdom	2012-2013	English Longitudinal Study of Ageing Wave 6 2012-2013	National	Both	50+	50+	3257	4015	included in 'Survey data' tab
GBR_2013_HSE	United Kingdom	2013	Health Survey for England	National	Both	5+	5+	3910	4577	included in 'Survey data' tab
GBR_2013_SHS	United Kingdom	2013	Scottish Health Survey (SHeS)	Subnational	Both	5+	5+	2340	2747	included in 'Survey data' tab
GBR_2014_HSE	United Kingdom	2014	Health Survey for England	National	Both	5+	5+	3712	4332	included in 'Survey data' tab
GBR_2014_NDNS	United Kingdom	2013-2014	National Diet and Nutrition Survey (NDNS)	National	Both	5+	5+	940	1194	included in 'Survey data' tab
GBR_2014_SHS	United Kingdom	2014	Scottish Health Survey (SHeS)	Subnational	Both	5+	5+	2248	2675	included in 'Survey data' tab
GBR_2015_HSE	United Kingdom	2015	Health Survey for England	National	Both	5+	5+	4837	5491	included in 'Survey data' tab
GBR_2015_NSHD	United Kingdom	2015	MRC National Survey of Health and Development	National	Both	69-70	69-70	1040	1082	included in 'Survey data' tab
GBR_2015_SHS	United Kingdom	2015	Scottish Health Survey (SHeS)	Subnational	Both	5+	5+	2264	2530	included in 'Survey data' tab
GBR_2016_HSE	United Kingdom	2016	Health Survey for England	National	Both	5+	5+	3432	4098	included in 'Survey data' tab
GBR_2016_NDNS	United Kingdom	2015-2016	National Diet and Nutrition Survey (NDNS)	National	Both	5+	5+	1021	1188	included in 'Survey data' tab
GBR_2016_SHS	United Kingdom	2016	Scottish Health Survey (SHeS)	Subnational	Both	5+	5+	2041	2395	included in 'Survey data' tab
GBR_2017_HSE	United Kingdom	2017	Health Survey for England	National	Both	5+	5+	3393	4151	included in 'Survey data' tab
GBR_2017_NDNS	United Kingdom	2016-2017	National Diet and Nutrition Survey (NDNS)	National	Both	5+	5+	468	545	included in 'Survey data' tab
GBR_2017_SHS	United Kingdom	2017	Scottish Health Survey	Subnational	Both	5+	5+	1734	2056	included in 'Survey data' tab
GBR_1988_EAS	United Kingdom	1987-1988	Edinburgh Artery Study	Community	Urban	54-75	54-75	808	783	contact
GBR_1993_10826504	United Kingdom	1992-1993	Whickham Survey	Community	Urban	35+	35+	676	784	contact
GBR_1993_EAS	United Kingdom	1992-1994	Edinburgh Artery Study	Community	Urban	60-81	60-81	580	582	contact
GBR_1995_EPICnorfolk	United Kingdom	1993-1997	EPIC Norfolk	Subnational	Both	40-79	40-79	11574	13995	contact
GBR_1995_HAS	United Kingdom	1994-1995	Hertfordshire Ageing Study	Subnational	Both	63-73	63-73	411	304	contact
GBR_1997_EPICoxford	United Kingdom	1993-2000	EPIC Oxford	Subnational	Both	20-98	20-98	10851	37605	contact
GBR_1999_BRHS	United Kingdom	1998-2000	The British Regional Heart Study	National	Urban	60-79		4138		contact
GBR_2000_BWHHS	United Kingdom	1999-2001	British Women's Heart and Health Study	National	Both		60-79		3677	contact
GBR_2000_EAS	United Kingdom	1999-2001	Edinburgh Artery Study	Community	Urban	66-87	66-87	373	404	contact
GBR_2001_HCS	United Kingdom	1999-2004	Hertfordshire Cohort Study	Subnational	Both	59-73	59-73	1571	1416	contact
GBR_2003_EMAS	United Kingdom	2003	The European Male Ageing Study	Community	Both	40+		394		contact
GBR_2004_HAS	United Kingdom	2003-2005	Hertfordshire Ageing Study	Subnational	Both	72-82	72-82	171	119	contact
GBR_2008_EMAS	United Kingdom	2008	The European Male Ageing Study	Community	Both	40+		301		contact
USA_1986_INTERSALT-Chicago	United States of America	1985-1986	INTERSALT, Chicago	Community	Urban	20-59	20-59	97	99	included in 'Survey data' tab
USA_1986_INTERSALT-Goodman	United States of America	1986	INTERSALT, Goodman	Community	Urban	20-59	20-59	192	192	included in 'Survey data' tab
USA_1986_MONICA-STAa	United States of America	1985-1986	MONICA, Stanford	Subnational	Urban	25-64	25-64	713	848	included in 'Survey data' tab
USA_1990_MONICA-STAa	United States of America	1989-1990	MONICA, Stanford	Subnational	Urban	25-64	25-64	720	842	included in 'Survey data' tab
USA_1991_NHANES	United States of America	1988-1994	US NHANES III	National	Both	5+	5+	11567	12524	included in 'Survey data' tab
USA_1996_AddHealth	United States of America	1996	National Longitudinal Study of Adolescent Health Wave II	National	Both	11-21	11-21	2287	2459	included in 'Survey data' tab
USA_1997_INTERMAP-Baltimore	United States of America	1996-1997	INTERMAP, Baltimore	Community	Urban	40-59	40-59	146	134	included in 'Survey data' tab
USA_1997_INTERMAP-CC	United States of America	1997-1998	INTERMAP, CC	Community	Urban	40-59	40-59	271	276	included in 'Survey data' tab
USA_1997_INTERMAP-Chicago	United States of America	1997-1998	INTERMAP, Chicago	Community	Urban	40-59	40-59	156	159	included in 'Survey data' tab
USA_1997_INTERMAP-Jackson	United States of America	1996-1997	INTERMAP, Jackson	Community	Urban	40-59	40-59	132	134	included in 'Survey data' tab
USA_1997_INTERMAP-Minneapolis	United States of America	1996-1998	INTERMAP, Minneapolis	Community	Urban	40-59	40-59	130	130	included in 'Survey data' tab
USA_1997_INTERMAP-Pittsburgh	United States of America	1996-1997	INTERMAP, Pittsburgh	Community	Urban	40-59	40-59	132	128	included in 'Survey data' tab
USA_1997_SWAN	United States of America	1996-1997	Study of Women's Health Across the Nation	Subnational	Both		40-55		3200	included in 'Survey data' tab
USA_1998_SWAN	United States of America	1997-1999	Study of Women's Health Across the Nation	Subnational	Both		40-55		2761	included in 'Survey data' tab
USA_1999_SWAN	United States of America	1998-2000	Study of Women's Health Across the Nation	Subnational	Both		40-55		2596	included in 'Survey data' tab
USA_2000_NHANES	United States of America	1999-2000	US NHANES 1999-2000	National	Both	5+	5+	3809	3791	included in 'Survey data' tab
USA_2000_SWAN	United States of America	1999-2001	Study of Women's Health Across the Nation	Subnational	Both		40-56		2507	included in 'Survey data' tab
USA_2001_SWAN	United States of America	2000-2002	Study of Women's Health Across the Nation	Subnational	Both		40-57		2441	included in 'Survey data' tab
USA_2002_AddHealth	United States of America	2001-2002	National Longitudinal Study of Adolescent Health Wave III	National	Both	18-28	18-28	2139	2443	included in 'Survey data' tab
USA_2002_NHANES	United States of America	2001-2002	US NHANES 2001-2002	National	Both	5+	5+	4045	4006	included in 'Survey data' tab
USA_2004_NHANES	United States of America	2003-2004	US NHANES 2003-2004	National	Both	5+	5+	3938	3838	included in 'Survey data' tab
USA_2006_NHANES	United States of America	2005-2006	US NHANES 2005-2006	National	Both	5+	5+	3984	3835	included in 'Survey data' tab
USA_2006_NSHAP	United States of America	2005-2006	National Social Life Health and Aging Project	National	Both	57-85	57-85	1355	1435	included in 'Survey data' tab
USA_2008_NHANES	United States of America	2007-2008	US NHANES 2007-2008	National	Both	5+	5+	4086	4038	included in 'Survey data' tab
USA_2009_AddHealth	United States of America	2008-2009	National Longitudinal Study of Adolescent Health Wave IV	National	Both	24-34	24-34	2317	2725	included in 'Survey data' tab
USA_2010_NHANES	United States of America	2009-2010	US NHANES 2009-2010	National	Both	5+	5+	4291	4332	included in 'Survey data' tab
USA_2011_NSHAP	United States of America	2010-2011	National Social Life Health and Aging Project	National	Both	36-99	36-99	1452	1736	included in 'Survey data' tab
USA_2012_NHANES	United States of America	2011-2012	US NHANES 2011-2012	National	Both	5+	5+	3951	3887	included in 'Survey data' tab
USA_2014_NHANES	United States of America	2013-2014	US NHANES 2013-2014	National	Both	5+	5+	4105	4225	included in 'Survey data' tab
USA_2016_NHANES	United States of America	2015-2016	US NHANES 2015-2016	National	Both	5+	5+	3959	4091	included in 'Survey data' tab
USA_2016_NSHAP	United States of America	2015-2016	National Social Life Health and Aging Project	Community	Both	24-99	24-99	1995	2490	included in 'Survey data' tab
USA_2018_NHANES	United States of America	2017-2018	National Health and Nutrition Examination Survey	National	Both	5+	5+	3642	3784	included in 'Survey data' tab
USA_1986_CARDIA	United States of America	1985-1986	Coronary Artery Risk Development in Young Adults (CARDIA)	Subnational	Urban	18-30	18-30	2321	2775	contact
USA_1986_MHS	United States of America	1985-1987	The Minnesota Heart Survey	Community	Both	25-75	25-75	5220	2421	contact
USA_1988_ARIC	United States of America	1987-1989	Atherosclerosis Risk in Communities Study	Subnational	Both	44-66	44-66	5041	6213	contact
USA_1988_BHS	United States of America	1987-1988	The Bogalusa Heart Study	Community	Rural	5-22	5-22	1685	1616	contact
USA_1988_CARDIA	United States of America	1987-1988	Coronary Artery Risk Development in Young Adults (CARDIA)	Subnational	Urban	20-32	20-32	2082	2506	contact
USA_1990_CHS	United States of America	1989-1990	Cardiovascular Health Study	Subnational	Both	65+	65+	2458	3318	contact
USA_1991_ARIC	United States of America	1990-1992	Atherosclerosis Risk in Communities Study	Subnational	Both	46-70	46-70	4537	5624	contact
USA_1991_CARDIA	United States of America	1990-1991	Coronary Artery Risk Development in Young Adults (CARDIA)	Subnational	Urban	23-35	23-35	1945	2382	contact
USA_1991_CHS	United States of America	1990-1991	Cardiovascular Health Study	Subnational	Both	65+	65+	2070	2707	contact
USA_1992_CHS	United States of America	1991-1992	Cardiovascular Health Study	Subnational	Both	65+	65+	1919	2563	contact
USA_1993_BHS	United States of America	1992-1994	The Bogalusa Heart Study	Community	Rural	5-21	5-21	1578	1627	contact
USA_1993_CARDIA	United States of America	1992-1993	Coronary Artery Risk Development in Young Adults (CARDIA)	Subnational	Urban	25-37	25-37	1823	2163	contact
USA_1993_CHS	United States of America	1992-1993	Cardiovascular Health Study	Subnational	Both	65+	65+	1985	2764	contact
USA_1994_ARIC	United States of America	1993-1995	Atherosclerosis Risk in Communities Study	Subnational	Both	48-73	48-73	4000	5015	contact
USA_1994_CHS	United States of America	1993-1994	Cardiovascular Health Study	Subnational	Both	65+	65+	1751	2471	contact
USA_1995_CHS	United States of America	1994-1995	Cardiovascular Health Study	Subnational	Both	66+	66+	1617	2354	contact
USA_1996_CARDIA	United States of America	1995-1996	Coronary Artery Risk Development in Young Adults (CARDIA)	Subnational	Urban	28-40	28-40	1739	2145	contact
USA_1996_CHS	United States of America	1995-1996	Cardiovascular Health Study	Subnational	Both	66+	66+	1478	2194	contact
USA_1996_WHI	United States of America	1993-1998	Women's Health Initiative - Observational Study	National	Both		49-81		92697	contact
USA_1997_ARIC	United States of America	1996-1998	Atherosclerosis Risk in Communities Study	Subnational	Both	50-75	50-75	3550	4485	contact
USA_1997_CHS	United States of America	1996-1997	Cardiovascular Health Study	Subnational	Both	67+	67+	1356	2043	contact
USA_1998_CHS	United States of America	1997-1998	Cardiovascular Health Study	Subnational	Both	68+	68+	1172	1801	contact
USA_1999_CHS	United States of America	1998-1999	Cardiovascular Health Study	Subnational	Both	69+	69+	1092	1684	contact
USA_2001_CARDIA	United States of America	2000-2001	Coronary Artery Risk Development in Young Adults (CARDIA)	Subnational	Urban	33-45	33-45	1570	1949	contact
USA_2004_HRS	United States of America	2004	Health and Retirement Study	National	Both	24+	24+	241	262	contact
USA_2006_CARDIA	United States of America	2005-2006	Coronary Artery Risk Development in Young Adults (CARDIA)	Subnational	Urban	38-50	38-50	1528	2000	contact
USA_2006_CHS	United States of America	2005-2006	Cardiovascular Health Study	Subnational	Both	70+	70+	375	684	contact
USA_2006_HRS	United States of America	2006	Health and Retirement Study	National	Both	53+	53+	2834	3822	contact
USA_2008_HRS	United States of America	2008	Health and Retirement Study	National	Both	55+	55+	2494	3493	contact
USA_2011_CARDIA	United States of America	2010-2011	Coronary Artery Risk Development in Young Adults (CARDIA)	Subnational	Urban	43-55	43-55	1513	1976	contact
USA_2011_HRS	United States of America	2010-2011	Health and Retirement Study	National	Both	57+	57+	2535	3465	contact
USA_2012_ARIC	United States of America	2011-2013	Atherosclerosis Risk in Communities Study	Subnational	Both	67-90	67-90	1787	2431	contact
USA_2012_HRS	United States of America	2012	Health and Retirement Study	National	Both	59+	59+	2294	3095	contact
USA_2014_HRS	United States of America	2014	Health and Retirement Study	National	Both	61+	61+	2152	2972	contact
USA_2017_HRS	United States of America	2016-2018	Health and Retirement Study	National	Both	63+	63+	1638	2321	contact
URY_2000_SABE	Uruguay	1999-2000	The Survey on Health, Well-Being, and Aging in Latin America and the Caribbean (SABE)	Community	Urban	60+	60+	492	828	included in 'Survey data' tab
URY_2006_STEPS	Uruguay	2006	STEPS	National	Both	25-64	25-64	261	641	included in 'Survey data' tab
URY_2013_STEPS	Uruguay	2013	STEPS	National	Urban	15-64	15-64	821	1400	included in 'Survey data' tab
URY_2012_CESCAS	Uruguay	2011-2012	CESCAS Study	Community	Urban	30-79	30-79	650	921	contact
URY_2014_GEFA	Uruguay	2012-2016	Genotype, Phenotype and Environment of Hypertension in Uruguay (GEFA-HT-UY)	Community	Urban	19+	19+	124	189	contact
UZB_1996_DHS	Uzbekistan	1996	DHS	National	Both		15-49		4082	included in 'Survey data' tab
UZB_2002_DHS	Uzbekistan	2002	DHS	National	Both	15-59	15-49	2331	5275	included in 'Survey data' tab
UZB_2014_STEPS	Uzbekistan	2014	STEPS	National	Both	18-64	18-64	1533	2164	included in 'Survey data' tab
UZB_2019_STEPS	Uzbekistan	2019	STEPS	National	Both	18-69	18-69	1462	2226	included in 'Survey data' tab
VUT_2005_STEPS	Vanuatu	2005	STEPS	Subnational	Both	15-60	15-60	626	759	included in 'Survey data' tab
VUT_2011_STEPS	Vanuatu	2011	STEPS	National	Both	25-64	25-64	2251	2183	included in 'Survey data' tab
VUT_1996_SNNS	Vanuatu	1996	Second National Nutrition Survey	National	Both		15-50		1353	contact
VUT_1998_VNCDS	Vanuatu	1998	Vanuatu Non-comunicable Disease Survey	National	Both	20-60	20-60	533	730	contact
VEN_2000_12862039	Venezuela	1999-2001	Florez et al., Diabetes Res Clin Pract 69(1):63-77, 2005	Subnational	Both	15+	15+	1134	2599	contact
VEN_2005_CARMELA	Venezuela	2004-2005	Cardiovascular Risk factors Multiple Evaluation in Latin America	Community	Urban	25-64	25-64	713	1123	contact
VEN_2006_citBrajkovich	Venezuela	2005-2006	Brajkovich et al., Rev Ven Endoc Metab 4(3):31-32, 2006	Community	Urban	20-65	20-65	205	439	contact
VEN_2008_VEMSOLS	Venezuela	2007-2008	Venezuelan Study of Metabolic Syndrome, Obesity and Lifestyle (VEMSOLS)	Community	Urban	20+	20+	107	230	contact
VEN_2009_VEMSOLS	Venezuela	2008-2009	Venezuelan Study of Metabolic Syndrome, Obesity and Lifestyle (VEMSOLS)	Community	Rural	20+	20+	51	89	contact
VEN_2011_VEMSOLS	Venezuela	2010-2011	Venezuelan Study of Metabolic Syndrome, Obesity and Lifestyle (VEMSOLS)	Community	Urban	20+	20+	66	193	contact
VEN_2016_EVESCAM	Venezuela	2015-2017	Cardio-Metabolic Health Venezuelan Study (EVESCAM)	National	Both	20+	20+	1056	2346	contact
VNM_2009_STEPS	Viet Nam	2009	STEPS	National	Both	25-64	25-64	6738	7805	included in 'Survey data' tab
VNM_2015_STEPS	Viet Nam	2015	STEPS	National	Both	18-69	18-69	1316	1722	included in 'Survey data' tab
VNM_1988_GNS	Viet Nam	1987-1989	General Nutrition Survey	National	Both	15-70	15-70	16012	19574	contact
VNM_1993_LSS	Viet Nam	1992-1993	Living Standard Survey	National	Both	5+	5+	9418	10209	contact
VNM_1998_LSS	Viet Nam	1997-1998	Living Standard Survey	National	Both	5+	5+	12052	13118	contact
VNM_2000_NNS	Viet Nam	2000	National Nutrition Survey	National	Both	20+	20+	8985	9464	contact
VNM_2002_NESHN	Viet Nam	2001-2003	The National Epidemiological Survey on Hypertension and Its Risk Factors (North)	Subnational	Both	25-74	25-74	2386	3604	contact
VNM_2002_VNHS	Viet Nam	2001-2002	Viet Nam National Health Survey 2001-2002	National	Both	5+	5+	66723	71616	contact
VNM_2004_5704035	Viet Nam	2004	Cuong et al., Eur J Clin Nutr 61(5):673-81, 2007	Community	Urban	20-60	20-60	717	771	contact
[truncated: 35 more rows]

## Sheet: Survey data
iso	id_study	sex	age	N_bmi	mean_bmi	se_bmi	prev_bmi_185less	prev_bmi_30plus	prev_bmi_35plus	mid_year	urban_rural	survey_type	Country	Superregion
AFG	AFG_2018_STEPS	1	25	553	24.0328	0.498153	0.0460942	0.0877308	0.0195465	2018	both	National	Afghanistan	South Asia
AFG	AFG_2018_STEPS	1	35	346	24.8676	0.750311	0.079324	0.146102	0.0715664	2018	both	National	Afghanistan	South Asia
AFG	AFG_2018_STEPS	1	45	391	25.6705	0.354104	0.0449964	0.163432	0.0203483	2018	both	National	Afghanistan	South Asia
AFG	AFG_2018_STEPS	1	55	253	24.9585	0.511924	0.0266199	0.109862	0.00936593	2018	both	National	Afghanistan	South Asia
AFG	AFG_2018_STEPS	1	65	302	25.0215	0.632486	0.0341778	0.165154	0.0345015	2018	both	National	Afghanistan	South Asia
AFG	AFG_2018_STEPS	2	25	492	24.9416	0.501598	0.109018	0.167278	0.0670561	2018	both	National	Afghanistan	South Asia
AFG	AFG_2018_STEPS	2	35	392	27.9369	0.936258	0.0799006	0.3513	0.167128	2018	both	National	Afghanistan	South Asia
AFG	AFG_2018_STEPS	2	45	341	26.4084	0.727353	0.0867258	0.245883	0.105927	2018	both	National	Afghanistan	South Asia
AFG	AFG_2018_STEPS	2	55	221	27.8475	0.76351	0.0597212	0.323377	0.111954	2018	both	National	Afghanistan	South Asia
AFG	AFG_2018_STEPS	2	65	112	25.8749	0.981024	0.125884	0.245561	0.0661838	2018	both	National	Afghanistan	South Asia
ALB	ALB_2009_DHS	1	25	646	24.4611	0.154343	0.0109903	0.0295953	0.000899634	2009	both	National	Albania	Central and Eastern Europe
ALB	ALB_2009_DHS	1	35	632	26.3929	0.143444	0.00287409	0.0927255	0.00792899	2009	both	National	Albania	Central and Eastern Europe
ALB	ALB_2009_DHS	1	45	1041	26.9155	0.113312	0.00227365	0.160845	0.0121159	2009	both	National	Albania	Central and Eastern Europe
ALB	ALB_2009_DHS	2	25	1679	23.1085	0.142233	0.0439144	0.0340433	0.00753696	2009	both	National	Albania	Central and Eastern Europe
ALB	ALB_2009_DHS	2	35	1943	25.4082	0.116319	0.0110555	0.113114	0.016187	2009	both	National	Albania	Central and Eastern Europe
ALB	ALB_2009_DHS	2	45	2276	26.6323	0.0919797	0.00575247	0.180351	0.0353019	2009	both	National	Albania	Central and Eastern Europe
ALB	ALB_2018_DHS	1	25	1312	24.7923	0.144417	0.0145398	0.0740714	0.0139958	2018	both	National	Albania	Central and Eastern Europe
ALB	ALB_2018_DHS	1	35	1099	26.6491	0.18032	0.00224507	0.152535	0.0390532	2018	both	National	Albania	Central and Eastern Europe
ALB	ALB_2018_DHS	1	45	1246	27.674	0.157868	0.00601563	0.251221	0.0527413	2018	both	National	Albania	Central and Eastern Europe
ALB	ALB_2018_DHS	1	55	1569	28.2611	0.15164	0.00199092	0.312761	0.0530085	2018	both	National	Albania	Central and Eastern Europe
ALB	ALB_2018_DHS	2	25	2695	23.3386	0.124974	0.0654181	0.0629745	0.021825	2018	both	National	Albania	Central and Eastern Europe
ALB	ALB_2018_DHS	2	35	2696	25.8961	0.133438	0.0198962	0.161687	0.0467199	2018	both	National	Albania	Central and Eastern Europe
ALB	ALB_2018_DHS	2	45	3355	28.5235	0.127998	0.00198117	0.316471	0.106453	2018	both	National	Albania	Central and Eastern Europe
ALB	ALB_2018_DHS	2	55	4052	29.8887	0.135405	0.00148575	0.453859	0.153648	2018	both	National	Albania	Central and Eastern Europe
ARE	ARE_2018_STEPS	1	25	332	26.8944	0.397382	0.0699495	0.243859	0.0896357	2018	both	National	United Arab Emirates	Central Asia and North Africa-Middle East
ARE	ARE_2018_STEPS	1	35	760	28.0916	0.273941	0.00144869	0.260458	0.0863484	2018	both	National	United Arab Emirates	Central Asia and North Africa-Middle East
ARE	ARE_2018_STEPS	1	45	563	28.465	0.27363	0.00578061	0.27319	0.0947912	2018	both	National	United Arab Emirates	Central Asia and North Africa-Middle East
ARE	ARE_2018_STEPS	1	55	273	28.8113	0.440323	0.0181578	0.317377	0.0958425	2018	both	National	United Arab Emirates	Central Asia and North Africa-Middle East
ARE	ARE_2018_STEPS	1	65	112	28.9207	0.755775	0.010157	0.29889	0.122412	2018	both	National	United Arab Emirates	Central Asia and North Africa-Middle East
ARE	ARE_2018_STEPS	1	75	52	26.4874	0.803277	0.073081	0.135169	0.0727984	2018	both	National	United Arab Emirates	Central Asia and North Africa-Middle East
ARE	ARE_2018_STEPS	2	25	471	26.1152	0.37286	0.0595903	0.206494	0.0699588	2018	both	National	United Arab Emirates	Central Asia and North Africa-Middle East
ARE	ARE_2018_STEPS	2	35	925	28.3034	0.242093	0.0103693	0.309174	0.108746	2018	both	National	United Arab Emirates	Central Asia and North Africa-Middle East
ARE	ARE_2018_STEPS	2	45	537	29.6133	0.339931	0.00870305	0.432575	0.174114	2018	both	National	United Arab Emirates	Central Asia and North Africa-Middle East
ARE	ARE_2018_STEPS	2	55	198	31.3856	0.664753	0	0.510778	0.235898	2018	both	National	United Arab Emirates	Central Asia and North Africa-Middle East
ARE	ARE_2018_STEPS	2	65	97	32.3469	0.966878	0.0177905	0.621988	0.308007	2018	both	National	United Arab Emirates	Central Asia and North Africa-Middle East
ARE	ARE_2018_STEPS	2	75	46	29.504	1.38204	0	0.42477	0.209977	2018	both	National	United Arab Emirates	Central Asia and North Africa-Middle East
ARG	ARG_1985_INTERSALT	1	25	25	24.0726	0.612722	0	0.12	0	1985	urban	Community	Argentina	Latin America and Caribbean
ARG	ARG_1985_INTERSALT	1	35	25	24.9976	0.594287	0	0.08	0	1985	urban	Community	Argentina	Latin America and Caribbean
ARG	ARG_1985_INTERSALT	1	45	25	26.6468	0.865499	0	0.24	0.08	1985	urban	Community	Argentina	Latin America and Caribbean
ARG	ARG_1985_INTERSALT	1	55	25	28.0837	0.778027	0	0.24	0.04	1985	urban	Community	Argentina	Latin America and Caribbean
ARG	ARG_1985_INTERSALT	2	25	25	22.6238	0.538403	0.04	0	0	1985	urban	Community	Argentina	Latin America and Caribbean
ARG	ARG_1985_INTERSALT	2	35	25	23.4594	0.819326	0.04	0.08	0.04	1985	urban	Community	Argentina	Latin America and Caribbean
ARG	ARG_1985_INTERSALT	2	45	25	23.5085	0.713869	0.04	0.04	0	1985	urban	Community	Argentina	Latin America and Caribbean
ARG	ARG_1985_INTERSALT	2	55	25	26.811	0.932212	0	0.28	0.04	1985	urban	Community	Argentina	Latin America and Caribbean
ARM	ARM_2000_DHS	2	25	1555	23.2282	0.0935954	0.0559469	0.0462335	0.0124843	2000	both	National	Armenia	Central Asia and North Africa-Middle East
ARM	ARM_2000_DHS	2	35	1638	25.4689	0.117048	0.0218906	0.148933	0.0358469	2000	both	National	Armenia	Central Asia and North Africa-Middle East
ARM	ARM_2000_DHS	2	45	1699	27.623	0.165516	0.0100406	0.293284	0.0879665	2000	both	National	Armenia	Central Asia and North Africa-Middle East
ARM	ARM_2005_DHS	1	25	357	23.0704	0.283189	0.0242093	0.0192627	0.00941801	2005	both	National	Armenia	Central Asia and North Africa-Middle East
ARM	ARM_2005_DHS	1	35	249	25.2883	0.327429	0.00272017	0.102621	0.0236325	2005	both	National	Armenia	Central Asia and North Africa-Middle East
ARM	ARM_2005_DHS	1	45	369	25.5319	0.269026	0.00391428	0.126774	0.0287864	2005	both	National	Armenia	Central Asia and North Africa-Middle East
ARM	ARM_2005_DHS	2	25	1792	23.0109	0.130621	0.0823603	0.0600115	0.0177293	2005	both	National	Armenia	Central Asia and North Africa-Middle East
ARM	ARM_2005_DHS	2	35	1395	25.8175	0.184808	0.0196409	0.153169	0.0511224	2005	both	National	Armenia	Central Asia and North Africa-Middle East
ARM	ARM_2005_DHS	2	45	1959	28.3379	0.165054	0.0123221	0.327445	0.117619	2005	both	National	Armenia	Central Asia and North Africa-Middle East
ARM	ARM_2016_DHS	2	25	1803	23.1483	0.102656	0.0658365	0.0447555	0.00852512	2016	both	National	Armenia	Central Asia and North Africa-Middle East
ARM	ARM_2016_DHS	2	35	1779	25.9923	0.140734	0.0123299	0.147161	0.0457221	2016	both	National	Armenia	Central Asia and North Africa-Middle East
ARM	ARM_2016_DHS	2	45	1442	28.8523	0.173692	0.00558145	0.348136	0.102296	2016	both	National	Armenia	Central Asia and North Africa-Middle East
ARM	ARM_2016_STEPS	1	25	154	23.8077	0.301954	0.0429308	0.0411481	0	2016	both	National	Armenia	Central Asia and North Africa-Middle East
ARM	ARM_2016_STEPS	1	35	95	25.5379	0.538827	0.0173364	0.123816	0.0468966	2016	both	National	Armenia	Central Asia and North Africa-Middle East
ARM	ARM_2016_STEPS	1	45	104	26.4002	0.510303	0.0067213	0.189647	0.0449146	2016	both	National	Armenia	Central Asia and North Africa-Middle East
ARM	ARM_2016_STEPS	1	55	124	26.9103	0.606692	0.0535972	0.278514	0.0690066	2016	both	National	Armenia	Central Asia and North Africa-Middle East
ARM	ARM_2016_STEPS	1	65	113	26.9101	0.552344	0.0242729	0.207193	0.0646468	2016	both	National	Armenia	Central Asia and North Africa-Middle East
ARM	ARM_2016_STEPS	2	25	244	22.1837	0.327635	0.163586	0.0574909	0.0198624	2016	both	National	Armenia	Central Asia and North Africa-Middle East
ARM	ARM_2016_STEPS	2	35	282	25.119	0.378158	0.0604596	0.15894	0.0595782	2016	both	National	Armenia	Central Asia and North Africa-Middle East
ARM	ARM_2016_STEPS	2	45	271	27.9238	0.393612	0.0101733	0.316417	0.126599	2016	both	National	Armenia	Central Asia and North Africa-Middle East
ARM	ARM_2016_STEPS	2	55	346	30.1752	0.406222	0.0137253	0.462788	0.19433	2016	both	National	Armenia	Central Asia and North Africa-Middle East
ARM	ARM_2016_STEPS	2	65	278	30.8739	0.423607	0.0173653	0.527075	0.19352	2016	both	National	Armenia	Central Asia and North Africa-Middle East
ASM	ASM_2004_STEPS	1	27.5	126	32.8675	1.31967	0	0.61249	0.274363	2004	both	National	American Samoa	Oceania
ASM	ASM_2004_STEPS	1	35	277	34.2099	0.3154	0	0.690659	0.399263	2004	both	National	American Samoa	Oceania
ASM	ASM_2004_STEPS	1	45	284	34.1838	0.430226	0	0.74339	0.413162	2004	both	National	American Samoa	Oceania
ASM	ASM_2004_STEPS	1	55	188	33.796	0.451318	0.00209925	0.710734	0.390387	2004	both	National	American Samoa	Oceania
ASM	ASM_2004_STEPS	1	62.5	74	32.2864	0.383323	0	0.653166	0.261369	2004	both	National	American Samoa	Oceania
ASM	ASM_2004_STEPS	2	27.5	145	35.4246	0.600729	0	0.74597	0.517118	2004	both	National	American Samoa	Oceania
ASM	ASM_2004_STEPS	2	35	329	37.4906	0.303169	0.00375406	0.810137	0.582897	2004	both	National	American Samoa	Oceania
ASM	ASM_2004_STEPS	2	45	341	36.9089	0.429207	0	0.842894	0.59848	2004	both	National	American Samoa	Oceania
ASM	ASM_2004_STEPS	2	55	179	36.3543	0.850247	0	0.809287	0.558892	2004	both	National	American Samoa	Oceania
ASM	ASM_2004_STEPS	2	62.5	66	34.1146	0.643063	0	0.70805	0.402773	2004	both	National	American Samoa	Oceania
AUS	AUS_1989_MONICA-NEWa	2	37.5	105	24.8688	0.246402	0	0.114286	0.0190476	1989	urban	Subnational	Australia	High-income Western countries
AUS	AUS_1989_MONICA-NEWa	2	45	208	26.1372	0.401596	0.0192308	0.158654	0.0625	1989	urban	Subnational	Australia	High-income Western countries
AUS	AUS_1989_MONICA-NEWa	2	55	213	27.6319	0.329509	0	0.267606	0.103286	1989	urban	Subnational	Australia	High-income Western countries
AUS	AUS_1989_MONICA-NEWa	2	62.5	145	27.0643	0.545855	0.00689655	0.213793	0.0551724	1989	urban	Subnational	Australia	High-income Western countries
AUS	AUS_1989_MONICA-NEWa	1	37.5	91	26.5029	0.414283	0	0.131868	0.010989	1989	urban	Subnational	Australia	High-income Western countries
AUS	AUS_1989_MONICA-NEWa	1	45	205	27.2214	0.463724	0.00487805	0.214634	0.0487805	1989	urban	Subnational	Australia	High-income Western countries
AUS	AUS_1989_MONICA-NEWa	1	55	212	27.7169	0.294041	0	0.231132	0.0518868	1989	urban	Subnational	Australia	High-income Western countries
AUS	AUS_1989_MONICA-NEWa	1	62.5	164	27.5362	0.315717	0	0.219512	0.0365854	1989	urban	Subnational	Australia	High-income Western countries
AUS	AUS_1989_MONICA-NEWa-Y	2	27.5	39	24.4989	0.921382	0.025641	0.153846	0.0512821	1989	urban	Community	Australia	High-income Western countries
AUS	AUS_1989_MONICA-NEWa-Y	2	32.5	45	23.5033	0.292988	0.0222222	0.0888889	0.0222222	1989	urban	Community	Australia	High-income Western countries
AUS	AUS_1989_MONICA-NEWa-Y	1	27.5	29	25.0694	0.26735	0	0.0689655	0	1989	urban	Community	Australia	High-income Western countries
AUS	AUS_1989_MONICA-NEWa-Y	1	32.5	41	26.3516	0.772808	0	0.097561	0.0243902	1989	urban	Community	Australia	High-income Western countries
AUS	AUS_1994_MONICA-NEWa	2	37.5	100	26.3858	0.632602	0.02	0.21	0.16	1994	urban	Subnational	Australia	High-income Western countries
AUS	AUS_1994_MONICA-NEWa	2	45	197	27.4429	0.429988	0.0101523	0.269036	0.116751	1994	urban	Subnational	Australia	High-income Western countries
AUS	AUS_1994_MONICA-NEWa	2	55	234	27.4667	0.345672	0.00854701	0.25641	0.0940171	1994	urban	Subnational	Australia	High-income Western countries
AUS	AUS_1994_MONICA-NEWa	2	62.5	157	28.1281	0.403251	0	0.273885	0.0955414	1994	urban	Subnational	Australia	High-income Western countries
AUS	AUS_1994_MONICA-NEWa	1	37.5	80	26.9419	0.49755	0.0125	0.2125	0.075	1994	urban	Subnational	Australia	High-income Western countries
AUS	AUS_1994_MONICA-NEWa	1	45	185	27.9104	0.279083	0	0.248649	0.0432432	1994	urban	Subnational	Australia	High-income Western countries
AUS	AUS_1994_MONICA-NEWa	1	55	202	28.6486	0.299747	0	0.321782	0.0940594	1994	urban	Subnational	Australia	High-income Western countries
AUS	AUS_1994_MONICA-NEWa	1	62.5	170	27.8557	0.274034	0.00588235	0.235294	0.0294118	1994	urban	Subnational	Australia	High-income Western countries
AUS	AUS_1994_MONICA-PER2	2	27.5	28	23.0682	0.691936	0.0357143	0.0714286	0	1994	urban	Community	Australia	High-income Western countries
AUS	AUS_1994_MONICA-PER2	2	35	82	24.5702	0.568031	0.0365854	0.109756	0.0487805	1994	urban	Community	Australia	High-income Western countries
AUS	AUS_1994_MONICA-PER2	2	45	99	25.8236	0.503596	0.010101	0.161616	0.0707071	1994	urban	Community	Australia	High-income Western countries
AUS	AUS_1994_MONICA-PER2	2	55	92	27.0491	0.562579	0	0.228261	0.0978261	1994	urban	Community	Australia	High-income Western countries
AUS	AUS_1994_MONICA-PER2	2	62.5	48	27.4147	0.66235	0.0208333	0.25	0.0416667	1994	urban	Community	Australia	High-income Western countries
AUS	AUS_1994_MONICA-PER2	1	27.5	23	24.6533	0.780593	0	0.173913	0	1994	urban	Community	Australia	High-income Western countries
AUS	AUS_1994_MONICA-PER2	1	35	91	25.5535	0.352702	0	0.0989011	0.021978	1994	urban	Community	Australia	High-income Western countries
AUS	AUS_1994_MONICA-PER2	1	45	97	26.6623	0.379787	0.0206186	0.154639	0.0206186	1994	urban	Community	Australia	High-income Western countries
AUS	AUS_1994_MONICA-PER2	1	55	99	26.446	0.376716	0.010101	0.171717	0.040404	1994	urban	Community	Australia	High-income Western countries
AUS	AUS_1994_MONICA-PER2	1	62.5	53	27.1002	0.409633	0	0.169811	0	1994	urban	Community	Australia	High-income Western countries
AUS	AUS_1994_MONICA-PER3	2	27.5	36	24.9776	0.914715	0.0833333	0.194444	0.0555556	1994	urban	Community	Australia	High-income Western countries
AUS	AUS_1994_MONICA-PER3	2	35	91	24.8228	0.397103	0	0.120879	0.021978	1994	urban	Community	Australia	High-income Western countries
AUS	AUS_1994_MONICA-PER3	2	45	110	25.8065	0.487406	0.0181818	0.190909	0.0818182	1994	urban	Community	Australia	High-income Western countries
AUS	AUS_1994_MONICA-PER3	2	55	104	27.8508	0.51943	0	0.298077	0.0769231	1994	urban	Community	Australia	High-income Western countries
AUS	AUS_1994_MONICA-PER3	2	62.5	46	26.3674	0.546513	0	0.152174	0.0217391	1994	urban	Community	Australia	High-income Western countries
AUS	AUS_1994_MONICA-PER3	1	27.5	26	26.4089	0.924638	0	0.192308	0.0769231	1994	urban	Community	Australia	High-income Western countries
AUS	AUS_1994_MONICA-PER3	1	35	95	25.8672	0.336008	0	0.11579	0	1994	urban	Community	Australia	High-income Western countries
AUS	AUS_1994_MONICA-PER3	1	45	102	27.2304	0.354335	0	0.22549	0.00980392	1994	urban	Community	Australia	High-income Western countries
AUS	AUS_1994_MONICA-PER3	1	55	105	27.1526	0.362772	0.00952381	0.190476	0.0285714	1994	urban	Community	Australia	High-income Western countries
AUS	AUS_1994_MONICA-PER3	1	62.5	45	26.6982	0.454973	0	0.133333	0	1994	urban	Community	Australia	High-income Western countries
AZE	AZE_2006_DHS	1	25	646	23.6784	0.134073	0.00698557	0.0153136	0.000459984	2006	both	National	Azerbaijan	Central Asia and North Africa-Middle East
AZE	AZE_2006_DHS	1	35	563	25.1643	0.186239	0.00810257	0.0609954	0.0114585	2006	both	National	Azerbaijan	Central Asia and North Africa-Middle East
AZE	AZE_2006_DHS	1	45	606	26.0021	0.174802	0.00387362	0.0747262	0.00832544	2006	both	National	Azerbaijan	Central Asia and North Africa-Middle East
AZE	AZE_2006_DHS	1	55	296	26.0341	0.199758	0.0126621	0.0943943	0.010341	2006	both	National	Azerbaijan	Central Asia and North Africa-Middle East
AZE	AZE_2006_DHS	2	25	2162	23.4397	0.124362	0.068034	0.0608932	0.0136981	2006	both	National	Azerbaijan	Central Asia and North Africa-Middle East
AZE	AZE_2006_DHS	2	35	2071	26.8238	0.163163	0.0158441	0.220048	0.0680534	2006	both	National	Azerbaijan	Central Asia and North Africa-Middle East
AZE	AZE_2006_DHS	2	45	2233	28.6813	0.160505	0.0114285	0.359236	0.110631	2006	both	National	Azerbaijan	Central Asia and North Africa-Middle East
AZE	AZE_2017_STEPS	1	25	191	23.8137	0.24616	0.0557825	0.0347126	0.00545495	2017	both	National	Azerbaijan	Central Asia and North Africa-Middle East
AZE	AZE_2017_STEPS	1	35	201	25.6756	0.258966	0.00487556	0.0928971	0.010374	2017	both	National	Azerbaijan	Central Asia and North Africa-Middle East
AZE	AZE_2017_STEPS	1	45	224	27.5993	0.312878	0.00319809	0.19076	0.0554914	2017	both	National	Azerbaijan	Central Asia and North Africa-Middle East
AZE	AZE_2017_STEPS	1	55	271	27.3845	0.320228	0.0045659	0.245313	0.0487148	2017	both	National	Azerbaijan	Central Asia and North Africa-Middle East
AZE	AZE_2017_STEPS	1	65	209	28.7328	0.35224	0.00363446	0.391347	0.0932259	2017	both	National	Azerbaijan	Central Asia and North Africa-Middle East
AZE	AZE_2017_STEPS	2	25	222	23.5621	0.340284	0.0814214	0.0908172	0.0319151	2017	both	National	Azerbaijan	Central Asia and North Africa-Middle East
AZE	AZE_2017_STEPS	2	35	309	26.3171	0.411377	0.0184214	0.208827	0.0795003	2017	both	National	Azerbaijan	Central Asia and North Africa-Middle East
AZE	AZE_2017_STEPS	2	45	316	28.3536	0.354996	0.0103721	0.298178	0.093923	2017	both	National	Azerbaijan	Central Asia and North Africa-Middle East
AZE	AZE_2017_STEPS	2	55	465	29.6397	0.305959	0.0103541	0.421155	0.120275	2017	both	National	Azerbaijan	Central Asia and North Africa-Middle East
AZE	AZE_2017_STEPS	2	65	237	31.1319	0.450648	0.00349625	0.551813	0.222743	2017	both	National	Azerbaijan	Central Asia and North Africa-Middle East
BDI	BDI_2010_DHS	2	25	1455	21.4496	0.104711	0.101646	0.0182716	0.00660503	2010	both	National	Burundi	Sub-Saharan Africa
BDI	BDI_2010_DHS	2	35	907	21.2353	0.135922	0.147691	0.0225211	0.00749283	2010	both	National	Burundi	Sub-Saharan Africa
BDI	BDI_2010_DHS	2	45	683	20.845	0.155587	0.215872	0.0238049	0.00805524	2010	both	National	Burundi	Sub-Saharan Africa
BDI	BDI_2017_DHS	2	25	2782	21.1506	0.0644015	0.130256	0.0127097	0.00186666	2017	both	National	Burundi	Sub-Saharan Africa
BDI	BDI_2017_DHS	2	35	1902	21.2768	0.117184	0.179282	0.0331825	0.015867	2017	both	National	Burundi	Sub-Saharan Africa
BDI	BDI_2017_DHS	2	45	1303	20.6103	0.101793	0.271247	0.0246012	0.00264547	2017	both	National	Burundi	Sub-Saharan Africa
BEL	BEL_1986_INTERSALT-Charleroi	1	25	11	23.9103	0.738764	0	0	0	1986	urban	Community	Belgium	High-income Western countries
BEL	BEL_1986_INTERSALT-Charleroi	1	35	21	26.2048	0.738844	0	0.0952381	0	1986	urban	Community	Belgium	High-income Western countries
BEL	BEL_1986_INTERSALT-Charleroi	1	45	25	25.8104	0.908508	0	0.2	0.04	1986	urban	Community	Belgium	High-income Western countries
BEL	BEL_1986_INTERSALT-Charleroi	1	55	25	26.6791	0.566645	0	0.12	0	1986	urban	Community	Belgium	High-income Western countries
BEL	BEL_1986_INTERSALT-Charleroi	2	25	9	23.6736	0.989635	0	0	0	1986	urban	Community	Belgium	High-income Western countries
BEL	BEL_1986_INTERSALT-Charleroi	2	35	20	23.8218	0.871951	0	0.05	0	1986	urban	Community	Belgium	High-income Western countries
BEL	BEL_1986_INTERSALT-Charleroi	2	45	22	26.6337	1.05681	0	0.227273	0.0454545	1986	urban	Community	Belgium	High-income Western countries
BEL	BEL_1986_INTERSALT-Charleroi	2	55	24	29.6489	0.746815	0	0.416667	0.125	1986	urban	Community	Belgium	High-income Western countries
BEL	BEL_1986_INTERSALT-Ghent	1	25	25	24.0472	0.758666	0	0.08	0	1986	urban	Community	Belgium	High-income Western countries
BEL	BEL_1986_INTERSALT-Ghent	1	35	25	23.9897	0.53764	0	0	0	1986	urban	Community	Belgium	High-income Western countries
BEL	BEL_1986_INTERSALT-Ghent	1	45	25	27.2879	0.804774	0	0.16	0.08	1986	urban	Community	Belgium	High-income Western countries
BEL	BEL_1986_INTERSALT-Ghent	1	55	25	26.1267	0.614244	0	0.12	0	1986	urban	Community	Belgium	High-income Western countries
BEL	BEL_1986_INTERSALT-Ghent	2	25	25	22.7368	0.659485	0	0	0	1986	urban	Community	Belgium	High-income Western countries
BEL	BEL_1986_INTERSALT-Ghent	2	35	25	24.0335	0.654922	0	0.04	0	1986	urban	Community	Belgium	High-income Western countries
BEL	BEL_1986_INTERSALT-Ghent	2	45	25	25.6062	0.800058	0	0.08	0	1986	urban	Community	Belgium	High-income Western countries
BEL	BEL_1986_INTERSALT-Ghent	2	55	25	25.1602	0.610271	0	0.12	0	1986	urban	Community	Belgium	High-income Western countries
BEL	BEL_1986_MONICA-CHAa	2	27.5	29	24.0986	0.973248	0	0.103448	0.0344828	1986	urban	Community	Belgium	High-income Western countries
BEL	BEL_1986_MONICA-CHAa	2	35	94	24.5874	0.431578	0.0212766	0.138298	0.0106383	1986	urban	Community	Belgium	High-income Western countries
BEL	BEL_1986_MONICA-CHAa	2	45	78	26.5143	0.572422	0.0128205	0.25641	0.0512821	1986	urban	Community	Belgium	High-income Western countries
BEL	BEL_1986_MONICA-CHAa	2	55	84	28.0074	0.585742	0.0119048	0.309524	0.107143	1986	urban	Community	Belgium	High-income Western countries
BEL	BEL_1986_MONICA-CHAa	2	62.5	42	28.2878	0.839693	0.0476191	0.357143	0.0714286	1986	urban	Community	Belgium	High-income Western countries
BEL	BEL_1986_MONICA-CHAa	1	27.5	29	24.0835	0.571014	0.0344828	0.0344828	0	1986	urban	Community	Belgium	High-income Western countries
BEL	BEL_1986_MONICA-CHAa	1	35	98	25.8648	0.374359	0.0306122	0.142857	0	1986	urban	Community	Belgium	High-income Western countries
BEL	BEL_1986_MONICA-CHAa	1	45	74	26.6519	0.504139	0	0.216216	0.054054	1986	urban	Community	Belgium	High-income Western countries
BEL	BEL_1986_MONICA-CHAa	1	55	105	27.0042	0.331019	0.00952381	0.190476	0.0190476	1986	urban	Community	Belgium	High-income Western countries
BEL	BEL_1986_MONICA-CHAa	1	62.5	41	27.7569	1.01361	0	0.243902	0.097561	1986	urban	Community	Belgium	High-income Western countries
BEL	BEL_1986_MONICA-GHEa	2	27.5	62	22.5877	0.496184	0.0967742	0.0645161	0.016129	1986	urban	Community	Belgium	High-income Western countries
BEL	BEL_1986_MONICA-GHEa	2	35	115	24.3169	0.414786	0.0173913	0.0869565	0.0434783	1986	urban	Community	Belgium	High-income Western countries
BEL	BEL_1986_MONICA-GHEa	2	45	116	25.6012	0.361602	0.00862069	0.112069	0.0172414	1986	urban	Community	Belgium	High-income Western countries
BEL	BEL_1986_MONICA-GHEa	2	55	115	26.9161	0.474935	0.026087	0.217391	0.113043	1986	urban	Community	Belgium	High-income Western countries
BEL	BEL_1986_MONICA-GHEa	2	62.5	51	27.6322	0.767685	0	0.196078	0.117647	1986	urban	Community	Belgium	High-income Western countries
BEL	BEL_1986_MONICA-GHEa	1	27.5	67	23.4798	0.390026	0.0149254	0.0298507	0	1986	urban	Community	Belgium	High-income Western countries
BEL	BEL_1986_MONICA-GHEa	1	35	143	24.7822	0.277714	0.020979	0.0489511	0	1986	urban	Community	Belgium	High-income Western countries
BEL	BEL_1986_MONICA-GHEa	1	45	124	26.3425	0.332757	0	0.137097	0.0241936	1986	urban	Community	Belgium	High-income Western countries
BEL	BEL_1986_MONICA-GHEa	1	55	148	26.2593	0.265134	0	0.108108	0.00675676	1986	urban	Community	Belgium	High-income Western countries
BEL	BEL_1986_MONICA-GHEa	1	62.5	67	26.0423	0.422295	0.0149254	0.119403	0	1986	urban	Community	Belgium	High-income Western countries
BEL	BEL_1989_MONICA-CHAa	2	27.5	32	24.1531	0.885662	0.03125	0.125	0.0625	1989	urban	Community	Belgium	High-income Western countries
BEL	BEL_1989_MONICA-CHAa	2	35	77	24.7171	0.553289	0.038961	0.116883	0.0519481	1989	urban	Community	Belgium	High-income Western countries
BEL	BEL_1989_MONICA-CHAa	2	45	69	25.1309	0.518347	0.0144928	0.101449	0.0289855	1989	urban	Community	Belgium	High-income Western countries
BEL	BEL_1989_MONICA-CHAa	2	55	89	27.08	0.548108	0.0224719	0.213483	0.0674157	1989	urban	Community	Belgium	High-income Western countries
BEL	BEL_1989_MONICA-CHAa	2	62.5	34	28.7897	0.812169	0	0.323529	0.147059	1989	urban	Community	Belgium	High-income Western countries
BEL	BEL_1989_MONICA-CHAa	1	27.5	31	25.043	0.598745	0.0322581	0.0967742	0	1989	urban	Community	Belgium	High-income Western countries
BEL	BEL_1989_MONICA-CHAa	1	35	78	25.756	0.458745	0.0128205	0.192308	0.0128205	1989	urban	Community	Belgium	High-income Western countries
BEL	BEL_1989_MONICA-CHAa	1	45	83	26.8367	0.493318	0	0.192771	0.0361446	1989	urban	Community	Belgium	High-income Western countries
BEL	BEL_1989_MONICA-CHAa	1	55	90	27.1689	0.399025	0.0222222	0.222222	0.0222222	1989	urban	Community	Belgium	High-income Western countries
BEL	BEL_1989_MONICA-CHAa	1	62.5	43	26.9319	0.559094	0.0232558	0.162791	0.0232558	1989	urban	Community	Belgium	High-income Western countries
BEL	BEL_1989_MONICA-GHEa	2	27.5	58	22.7259	0.53593	0.0517241	0.0344828	0.0172414	1989	urban	Community	Belgium	High-income Western countries
BEL	BEL_1989_MONICA-GHEa	2	35	101	23.1914	0.368654	0.039604	0.0594059	0	1989	urban	Community	Belgium	High-income Western countries
BEL	BEL_1989_MONICA-GHEa	2	45	127	25.4165	0.363978	0.015748	0.133858	0.0314961	1989	urban	Community	Belgium	High-income Western countries
BEL	BEL_1989_MONICA-GHEa	2	55	118	26.218	0.400794	0	0.161017	0.0423729	1989	urban	Community	Belgium	High-income Western countries
BEL	BEL_1989_MONICA-GHEa	2	62.5	45	26.5606	0.63865	0	0.133333	0.0444444	1989	urban	Community	Belgium	High-income Western countries
BEL	BEL_1989_MONICA-GHEa	1	27.5	50	23.5078	0.339704	0	0.02	0	1989	urban	Community	Belgium	High-income Western countries
BEL	BEL_1989_MONICA-GHEa	1	35	131	24.6291	0.281341	0.00763359	0.0763359	0	1989	urban	Community	Belgium	High-income Western countries
BEL	BEL_1989_MONICA-GHEa	1	45	97	26.6895	0.384226	0	0.164948	0.0412371	1989	urban	Community	Belgium	High-income Western countries
BEL	BEL_1989_MONICA-GHEa	1	55	117	26.738	0.326043	0	0.17094	0.017094	1989	urban	Community	Belgium	High-income Western countries
BEL	BEL_1989_MONICA-GHEa	1	62.5	61	26.5213	0.484404	0	0.213115	0	1989	urban	Community	Belgium	High-income Western countries
BEL	BEL_1991_MONICA-CHAa	2	27.5	30	23.6639	0.693507	0	0.1	0	1991	urban	Community	Belgium	High-income Western countries
BEL	BEL_1991_MONICA-CHAa	2	35	73	25.1866	0.656431	0.0547945	0.164384	0.0684932	1991	urban	Community	Belgium	High-income Western countries
BEL	BEL_1991_MONICA-CHAa	2	45	93	27.1823	0.647151	0.0322581	0.268817	0.129032	1991	urban	Community	Belgium	High-income Western countries
BEL	BEL_1991_MONICA-CHAa	2	55	90	26.8011	0.512829	0.0111111	0.233333	0.0444444	1991	urban	Community	Belgium	High-income Western countries
BEL	BEL_1991_MONICA-CHAa	2	62.5	46	27.3949	0.628499	0.0217391	0.23913	0.0434783	1991	urban	Community	Belgium	High-income Western countries
BEL	BEL_1991_MONICA-CHAa	1	27.5	29	24.9694	0.730209	0	0.137931	0	1991	urban	Community	Belgium	High-income Western countries
BEL	BEL_1991_MONICA-CHAa	1	35	90	25.1082	0.395936	0.0222222	0.111111	0.0222222	1991	urban	Community	Belgium	High-income Western countries
BEL	BEL_1991_MONICA-CHAa	1	45	93	27.2882	0.582128	0.0107527	0.182796	0.0645161	1991	urban	Community	Belgium	High-income Western countries
BEL	BEL_1991_MONICA-CHAa	1	55	80	27.6406	0.405564	0	0.2625	0.025	1991	urban	Community	Belgium	High-income Western countries
BEL	BEL_1991_MONICA-CHAa	1	62.5	45	27.4172	0.824679	0	0.111111	0.0222222	1991	urban	Community	Belgium	High-income Western countries
BEL	BEL_1991_MONICA-GHEa	2	27.5	58	22.3197	0.410508	0.0517241	0.0344828	0	1991	urban	Community	Belgium	High-income Western countries
BEL	BEL_1991_MONICA-GHEa	2	35	121	24.0049	0.361796	0.0330578	0.0743802	0.0165289	1991	urban	Community	Belgium	High-income Western countries
BEL	BEL_1991_MONICA-GHEa	2	45	129	25.7605	0.50437	0.0232558	0.116279	0.0465116	1991	urban	Community	Belgium	High-income Western countries
BEL	BEL_1991_MONICA-GHEa	2	55	123	26.9439	0.409743	0.00813008	0.260163	0.0569106	1991	urban	Community	Belgium	High-income Western countries
BEL	BEL_1991_MONICA-GHEa	2	62.5	44	27.0757	0.56811	0	0.136364	0.0454545	1991	urban	Community	Belgium	High-income Western countries
BEL	BEL_1991_MONICA-GHEa	1	27.5	57	23.3671	0.403994	0.0175439	0.0350877	0	1991	urban	Community	Belgium	High-income Western countries
BEL	BEL_1991_MONICA-GHEa	1	35	149	24.7451	0.275294	0.0134228	0.0671141	0	1991	urban	Community	Belgium	High-income Western countries
BEL	BEL_1991_MONICA-GHEa	1	45	112	26.3064	0.340696	0.00892857	0.116071	0.0178571	1991	urban	Community	Belgium	High-income Western countries
BEL	BEL_1991_MONICA-GHEa	1	55	127	27.1129	0.35209	0.015748	0.19685	0.023622	1991	urban	Community	Belgium	High-income Western countries
BEL	BEL_1991_MONICA-GHEa	1	62.5	62	27.0322	0.543741	0.016129	0.145161	0.0322581	1991	urban	Community	Belgium	High-income Western countries
BEN	BEN_1996_DHS	2	25	1155	20.9266	0.101782	0.148875	0.0100103	0.00282713	1996	both	National	Benin	Sub-Saharan Africa
BEN	BEN_1996_DHS	2	35	797	21.7294	0.162887	0.14039	0.0368646	0.0150287	1996	both	National	Benin	Sub-Saharan Africa
BEN	BEN_1996_DHS	2	45	185	21.7827	0.229145	0.148431	0.0419493	0.00420032	1996	both	National	Benin	Sub-Saharan Africa
BEN	BEN_2001_DHS	2	25	1976	21.9281	0.102033	0.107382	0.0312355	0.00843876	2001	both	National	Benin	Sub-Saharan Africa
BEN	BEN_2001_DHS	2	35	1410	23.4357	0.154082	0.0757235	0.102628	0.0324733	2001	both	National	Benin	Sub-Saharan Africa
BEN	BEN_2001_DHS	2	45	945	23.7122	0.195079	0.0933359	0.124021	0.0253579	2001	both	National	Benin	Sub-Saharan Africa
BEN	BEN_2006_DHS	2	25	5357	22.1535	0.0679601	0.0872663	0.0326016	0.0102788	2006	both	National	Benin	Sub-Saharan Africa
BEN	BEN_2006_DHS	2	35	4141	23.2662	0.0918875	0.0731429	0.0811342	0.0253441	2006	both	National	Benin	Sub-Saharan Africa
BEN	BEN_2006_DHS	2	45	2791	23.9102	0.13785	0.086528	0.112802	0.0425731	2006	both	National	Benin	Sub-Saharan Africa
BEN	BEN_2007_STEPS	1	27.5	243	22.1696	0.215614	0.0823045	0.0329218	0.00823045	2007	urban	Community	Benin	Sub-Saharan Africa
BEN	BEN_2007_STEPS	1	35	309	23.6137	0.212827	0.0550162	0.0550162	0	2007	urban	Community	Benin	Sub-Saharan Africa
BEN	BEN_2007_STEPS	1	45	204	24.4403	0.283229	0.0637255	0.0833333	0.0147059	2007	urban	Community	Benin	Sub-Saharan Africa
BEN	BEN_2007_STEPS	1	55	127	24.8584	0.483778	0.0472441	0.0944882	0.0472441	2007	urban	Community	Benin	Sub-Saharan Africa
BEN	BEN_2007_STEPS	1	62.5	72	25.7659	0.671788	0.0972222	0.222222	0.0555556	2007	urban	Community	Benin	Sub-Saharan Africa
BEN	BEN_2007_STEPS	2	27.5	379	24.6038	0.258643	0.0686016	0.137203	0.0343008	2007	urban	Community	Benin	Sub-Saharan Africa
BEN	BEN_2007_STEPS	2	35	468	27.3367	0.28835	0.0235043	0.301282	0.104701	2007	urban	Community	Benin	Sub-Saharan Africa
BEN	BEN_2007_STEPS	2	45	286	29.304	0.431366	0.0244755	0.423077	0.213287	2007	urban	Community	Benin	Sub-Saharan Africa
BEN	BEN_2007_STEPS	2	55	230	28.699	0.414346	0.0347826	0.395652	0.169565	2007	urban	Community	Benin	Sub-Saharan Africa
BEN	BEN_2007_STEPS	2	62.5	145	28.5416	0.586777	0.0413793	0.4	0.151724	2007	urban	Community	Benin	Sub-Saharan Africa
BEN	BEN_2008_STEPS	1	27.5	631	22.1642	0.108285	0.0475436	0.00950872	0.00475436	2008	both	National	Benin	Sub-Saharan Africa
BEN	BEN_2008_STEPS	1	35	1017	23.214	0.127048	0.0570305	0.0550639	0.00884956	2008	both	National	Benin	Sub-Saharan Africa
BEN	BEN_2008_STEPS	1	45	733	23.1988	0.143192	0.0736698	0.0572988	0.00545703	2008	both	National	Benin	Sub-Saharan Africa
BEN	BEN_2008_STEPS	1	55	622	22.3728	0.181859	0.136656	0.0514469	0.0128617	2008	both	National	Benin	Sub-Saharan Africa
BEN	BEN_2008_STEPS	1	62.5	427	21.9417	0.191746	0.185012	0.0398126	0.00702576	2008	both	National	Benin	Sub-Saharan Africa
BEN	BEN_2008_STEPS	2	27.5	559	23.0041	0.166443	0.0715564	0.0483005	0.0161002	2008	both	National	Benin	Sub-Saharan Africa
BEN	BEN_2008_STEPS	2	35	844	24.7613	0.189099	0.0722749	0.162322	0.0450237	2008	both	National	Benin	Sub-Saharan Africa
BEN	BEN_2008_STEPS	2	45	700	25.4661	0.239092	0.08	0.187143	0.0785714	2008	both	National	Benin	Sub-Saharan Africa
BEN	BEN_2008_STEPS	2	55	775	24.7502	0.212454	0.104516	0.166452	0.0619355	2008	both	National	Benin	Sub-Saharan Africa
BEN	BEN_2008_STEPS	2	62.5	487	23.4765	0.231304	0.141684	0.117043	0.0225873	2008	both	National	Benin	Sub-Saharan Africa
BEN	BEN_2012_DHS	2	25	4963	23.2258	0.132574	0.0553808	0.0494045	0.0189885	2012	both	National	Benin	Sub-Saharan Africa
BEN	BEN_2012_DHS	2	35	4256	24.3395	0.0913049	0.0410796	0.0906636	0.0335482	2012	both	National	Benin	Sub-Saharan Africa
BEN	BEN_2012_DHS	2	45	2671	25.1686	0.144231	0.0377963	0.13601	0.0482703	2012	both	National	Benin	Sub-Saharan Africa
BEN	BEN_2015_STEPS	1	25	589	22.4346	0.243304	0.0649095	0.0286119	0.00672941	2015	both	National	Benin	Sub-Saharan Africa
BEN	BEN_2015_STEPS	1	35	619	23.1675	0.200186	0.0568695	0.0558275	0.0133096	2015	both	National	Benin	Sub-Saharan Africa
BEN	BEN_2015_STEPS	1	45	510	22.6572	0.613036	0.140704	0.0537576	0.0182285	2015	both	National	Benin	Sub-Saharan Africa
BEN	BEN_2015_STEPS	1	55	308	23.3477	0.345413	0.104267	0.0898844	0.0155822	2015	both	National	Benin	Sub-Saharan Africa
BEN	BEN_2015_STEPS	1	65	208	22.067	0.333228	0.187004	0.0652836	0.00352374	2015	both	National	Benin	Sub-Saharan Africa
BEN	BEN_2015_STEPS	2	25	732	23.0296	0.190832	0.0767634	0.0592927	0.0175308	2015	both	National	Benin	Sub-Saharan Africa
BEN	BEN_2015_STEPS	2	35	740	23.668	0.385471	0.0545503	0.0909231	0.0341971	2015	both	National	Benin	Sub-Saharan Africa
BEN	BEN_2015_STEPS	2	45	477	23.8613	1.06165	0.0554349	0.141636	0.0422034	2015	both	National	Benin	Sub-Saharan Africa
BEN	BEN_2015_STEPS	2	55	297	25.1902	0.468986	0.106121	0.188703	0.0659134	2015	both	National	Benin	Sub-Saharan Africa
BEN	BEN_2015_STEPS	2	65	196	24.8003	0.535636	0.08538	0.175075	0.0634292	2015	both	National	Benin	Sub-Saharan Africa
BEN	BEN_2018_DHS	2	25	2460	22.4948	0.0921333	0.0994295	0.0494313	0.0138741	2018	both	National	Benin	Sub-Saharan Africa
BEN	BEN_2018_DHS	2	35	1848	24.5867	0.170284	0.0752271	0.155768	0.053155	2018	both	National	Benin	Sub-Saharan Africa
BEN	BEN_2018_DHS	2	45	1334	25.1219	0.197985	0.0651296	0.183134	0.058932	2018	both	National	Benin	Sub-Saharan Africa
BFA	BFA_1993_DHS	2	25	1616	20.9718	0.07713	0.134521	0.00496994	0.00219354	1993	both	National	Burkina Faso	Sub-Saharan Africa
BFA	BFA_1993_DHS	2	35	1162	21.2236	0.105814	0.147808	0.0190821	0.00956292	1993	both	National	Burkina Faso	Sub-Saharan Africa
BFA	BFA_1993_DHS	2	45	412	20.9854	0.143885	0.187593	0.00905793	0.002016	1993	both	National	Burkina Faso	Sub-Saharan Africa
BFA	BFA_1999_DHS	2	25	1543	20.8585	0.0853851	0.130845	0.00531444	0.000809716	1999	both	National	Burkina Faso	Sub-Saharan Africa
BFA	BFA_1999_DHS	2	35	1154	21.1588	0.113158	0.13355	0.0155487	0.00761857	1999	both	National	Burkina Faso	Sub-Saharan Africa
BFA	BFA_1999_DHS	2	45	417	20.7786	0.144881	0.149961	0.0130132	0.00129276	1999	both	National	Burkina Faso	Sub-Saharan Africa
BFA	BFA_2003_DHS	2	25	3532	21.1591	0.0906882	0.158937	0.0220456	0.00755844	2003	both	National	Burkina Faso	Sub-Saharan Africa
BFA	BFA_2003_DHS	2	35	2734	21.2393	0.141359	0.184061	0.0359727	0.0107099	2003	both	National	Burkina Faso	Sub-Saharan Africa
BFA	BFA_2003_DHS	2	45	2215	21.0232	0.127664	0.246391	0.0347133	0.0116129	2003	both	National	Burkina Faso	Sub-Saharan Africa
BFA	BFA_2010_DHS	2	25	2669	21.3081	0.0746813	0.121257	0.0169713	0.00397112	2010	both	National	Burkina Faso	Sub-Saharan Africa
BFA	BFA_2010_DHS	2	35	2087	21.7149	0.104271	0.142616	0.0434827	0.015081	2010	both	National	Burkina Faso	Sub-Saharan Africa
BFA	BFA_2010_DHS	2	45	1412	22.1536	0.140023	0.159332	0.0633808	0.0183154	2010	both	National	Burkina Faso	Sub-Saharan Africa
BFA	BFA_2013_STEPS	1	27.5	571	21.9673	0.161182	0.0620138	0.0141638	0	2013	both	National	Burkina Faso	Sub-Saharan Africa
BFA	BFA_2013_STEPS	1	35	670	22.5227	0.168889	0.0566393	0.0381467	0.00194094	2013	both	National	Burkina Faso	Sub-Saharan Africa
BFA	BFA_2013_STEPS	1	45	486	23.0447	0.272932	0.068161	0.0455389	0.0080301	2013	both	National	Burkina Faso	Sub-Saharan Africa
BFA	BFA_2013_STEPS	1	55	333	21.9849	0.260617	0.14547	0.0339308	0	2013	both	National	Burkina Faso	Sub-Saharan Africa
BFA	BFA_2013_STEPS	1	62.5	163	21.6242	0.358734	0.154791	0.0203455	0	2013	both	National	Burkina Faso	Sub-Saharan Africa
BFA	BFA_2013_STEPS	2	27.5	633	21.9602	0.241344	0.120732	0.0488725	0.0124358	2013	both	National	Burkina Faso	Sub-Saharan Africa
BFA	BFA_2013_STEPS	2	35	716	22.5612	0.189726	0.117981	0.0557622	0.011325	2013	both	National	Burkina Faso	Sub-Saharan Africa
BFA	BFA_2013_STEPS	2	45	486	22.5768	0.310262	0.173316	0.0732866	0.0145884	2013	both	National	Burkina Faso	Sub-Saharan Africa
BFA	BFA_2013_STEPS	2	55	310	22.0212	0.366372	0.201049	0.0718812	0.0264088	2013	both	National	Burkina Faso	Sub-Saharan Africa
BFA	BFA_2013_STEPS	2	62.5	105	22.5645	1.10403	0.286803	0.102623	0.0660286	2013	both	National	Burkina Faso	Sub-Saharan Africa
BGD	BGD_1997_DHS	2	25	2319	18.917	0.0764021	0.507709	0.00559205	0.00227577	1997	both	National	Bangladesh	South Asia
BGD	BGD_1997_DHS	2	35	898	18.844	0.133308	0.542249	0.00728924	0.00296049	1997	both	National	Bangladesh	South Asia
BGD	BGD_1997_DHS	2	45	167	19.0796	0.365382	0.517227	0.00999323	0.00658831	1997	both	National	Bangladesh	South Asia
BGD	BGD_2000_DHS	2	25	2607	19.4631	0.0699155	0.421789	0.00868089	0.00183579	2000	both	National	Bangladesh	South Asia
BGD	BGD_2000_DHS	2	35	1105	19.2937	0.118306	0.463341	0.00719295	0.000318841	2000	both	National	Bangladesh	South Asia
BGD	BGD_2000_DHS	2	45	175	18.8275	0.199951	0.563486	0.00659855	0	2000	both	National	Bangladesh	South Asia
BGD	BGD_2004_DHS	2	25	3824	20.0387	0.0726192	0.335966	0.00987862	0.000526297	2004	both	National	Bangladesh	South Asia
BGD	BGD_2004_DHS	2	35	3119	20.595	0.087456	0.309356	0.0179755	0.00261138	2004	both	National	Bangladesh	South Asia
BGD	BGD_2004_DHS	2	45	2222	20.3224	0.122228	0.371149	0.0216063	0.000723685	2004	both	National	Bangladesh	South Asia
BGD	BGD_2007_DHS	2	25	3676	20.5129	0.0812253	0.299587	0.0124704	0.00151806	2007	both	National	Bangladesh	South Asia
BGD	BGD_2007_DHS	2	35	3126	21.102	0.100261	0.259695	0.0245042	0.00321297	2007	both	National	Bangladesh	South Asia
BGD	BGD_2007_DHS	2	45	2235	20.7932	0.104195	0.314485	0.0219386	0.00301938	2007	both	National	Bangladesh	South Asia
BGD	BGD_2010_STEPS	1	27.5	588	20.3655	0.136238	0.282313	0.0085034	0	2010	both	National	Bangladesh	South Asia
BGD	BGD_2010_STEPS	1	35	1168	21.3204	0.124501	0.233733	0.0273973	0.00599315	2010	both	National	Bangladesh	South Asia
BGD	BGD_2010_STEPS	1	45	978	21.3405	0.151361	0.257669	0.0235174	0.00511247	2010	both	National	Bangladesh	South Asia
BGD	BGD_2010_STEPS	1	55	796	21.1174	0.160562	0.267588	0.0251256	0.00753769	2010	both	National	Bangladesh	South Asia
BGD	BGD_2010_STEPS	1	65	441	20.2474	0.187345	0.344671	0.0181406	0	2010	both	National	Bangladesh	South Asia
BGD	BGD_2010_STEPS	1	75	251	19.7598	0.202458	0.386454	0.00398406	0	2010	both	National	Bangladesh	South Asia
BGD	BGD_2010_STEPS	2	27.5	1063	21.6123	0.131298	0.220132	0.0329257	0.00470367	2010	both	National	Bangladesh	South Asia
BGD	BGD_2010_STEPS	2	35	1638	22.446	0.124527	0.188645	0.0573871	0.013431	2010	both	National	Bangladesh	South Asia
BGD	BGD_2010_STEPS	2	45	1139	22.2153	0.155583	0.214223	0.0509219	0.00965759	2010	both	National	Bangladesh	South Asia
BGD	BGD_2010_STEPS	2	55	611	21.742	0.245109	0.279869	0.0654664	0.01473	2010	both	National	Bangladesh	South Asia
BGD	BGD_2010_STEPS	2	65	270	20.7157	0.279069	0.377778	0.0259259	0.0185185	2010	both	National	Bangladesh	South Asia
BGD	BGD_2010_STEPS	2	75	96	19.6229	0.36409	0.416667	0.0104167	0	2010	both	National	Bangladesh	South Asia
BGD	BGD_2011_DHS	1	25	825	20.3751	0.139951	0.293552	0.00871112	0.0032757	2011	both	National	Bangladesh	South Asia
BGD	BGD_2011_DHS	1	35	1258	21.0351	0.102191	0.211238	0.00613562	0.00120001	2011	both	National	Bangladesh	South Asia
BGD	BGD_2011_DHS	1	45	1223	20.8866	0.106471	0.233766	0.00612327	0.000393856	2011	both	National	Bangladesh	South Asia
BGD	BGD_2011_DHS	1	55	914	20.4588	0.130959	0.303139	0.00964114	0.00251785	2011	both	National	Bangladesh	South Asia
BGD	BGD_2011_DHS	1	65	552	19.9484	0.150692	0.332818	0.00767704	0.000611202	2011	both	National	Bangladesh	South Asia
BGD	BGD_2011_DHS	1	75	292	19.4108	0.168165	0.426181	0.00314387	0	2011	both	National	Bangladesh	South Asia
BGD	BGD_2011_DHS	2	25	6222	21.111	0.0641772	0.245597	0.0202207	0.00231894	2011	both	National	Bangladesh	South Asia
BGD	BGD_2011_DHS	2	35	4800	21.945	0.0868783	0.200478	0.0362377	0.00387304	2011	both	National	Bangladesh	South Asia
BGD	BGD_2011_DHS	2	45	3982	21.863	0.0985543	0.236509	0.0422307	0.00837052	2011	both	National	Bangladesh	South Asia
BGD	BGD_2011_DHS	2	55	818	20.9019	0.170043	0.309466	0.0315168	0.00486156	2011	both	National	Bangladesh	South Asia
BGD	BGD_2011_DHS	2	65	485	20.6195	0.219288	0.363623	0.0325009	0.00821871	2011	both	National	Bangladesh	South Asia
BGD	BGD_2011_DHS	2	75	222	19.9786	0.257858	0.400283	0.00982519	0.00245077	2011	both	National	Bangladesh	South Asia
BGD	BGD_2013_STEPS	1	27.5	279	22.4438	0.188634	0.0860215	0.0286738	0.00358423	2013	both	National	Bangladesh	South Asia
BGD	BGD_2013_STEPS	1	35	410	23.1065	0.173242	0.0585366	0.0439024	0.00731707	2013	both	National	Bangladesh	South Asia
BGD	BGD_2013_STEPS	1	45	451	23.2975	0.176038	0.075388	0.0465632	0.00665188	2013	both	National	Bangladesh	South Asia
BGD	BGD_2013_STEPS	1	55	315	22.8988	0.216494	0.0825397	0.0412698	0.00634921	2013	both	National	Bangladesh	South Asia
BGD	BGD_2013_STEPS	1	65	209	22.0583	0.276162	0.181818	0.0430622	0.00478469	2013	both	National	Bangladesh	South Asia
BGD	BGD_2013_STEPS	1	75	102	21.6988	0.435192	0.22549	0.0392157	0.00980392	2013	both	National	Bangladesh	South Asia
BGD	BGD_2013_STEPS	2	27.5	495	22.4426	0.180391	0.145455	0.0484848	0.00808081	2013	both	National	Bangladesh	South Asia
BGD	BGD_2013_STEPS	2	35	662	23.3054	0.163347	0.0951662	0.0543807	0.0120846	2013	both	National	Bangladesh	South Asia
BGD	BGD_2013_STEPS	2	45	523	23.7415	0.204935	0.0898662	0.0803059	0.0267686	2013	both	National	Bangladesh	South Asia
BGD	BGD_2013_STEPS	2	55	290	22.6084	0.256184	0.182759	0.0655172	0.00689655	2013	both	National	Bangladesh	South Asia
BGD	BGD_2013_STEPS	2	65	195	22.4317	0.333259	0.205128	0.0564103	0.0102564	2013	both	National	Bangladesh	South Asia
BGD	BGD_2013_STEPS	2	75	73	21.7599	0.54606	0.273973	0.0410959	0	2013	both	National	Bangladesh	South Asia
BGD	BGD_2014_DHS	2	25	5850	21.8845	0.0826918	0.195899	0.026956	0.00530341	2014	both	National	Bangladesh	South Asia
BGD	BGD_2014_DHS	2	35	5181	23.0966	0.119614	0.135106	0.0611294	0.0108878	2014	both	National	Bangladesh	South Asia
BGD	BGD_2014_DHS	2	45	3932	22.6499	0.125341	0.187604	0.0594445	0.00659829	2014	both	National	Bangladesh	South Asia
BGD	BGD_2018_STEPS	1	25	647	21.4034	0.193908	0.175301	0.0197673	0.000862265	2018	both	National	Bangladesh	South Asia
BGD	BGD_2018_STEPS	1	35	1099	22.6544	0.168712	0.124057	0.0246705	0.00518001	2018	both	National	Bangladesh	South Asia
BGD	BGD_2018_STEPS	1	45	884	22.4956	0.163439	0.134896	0.03942	0.00619428	2018	both	National	Bangladesh	South Asia
BGD	BGD_2018_STEPS	1	55	669	22.0134	0.20313	0.161908	0.0322157	0.0052373	2018	both	National	Bangladesh	South Asia
BGD	BGD_2018_STEPS	1	65	367	21.1924	0.232241	0.213363	0.00920291	0.000849372	2018	both	National	Bangladesh	South Asia
BGD	BGD_2018_STEPS	2	25	917	23.4064	0.1933	0.106629	0.0803081	0.0101173	2018	both	National	Bangladesh	South Asia
BGD	BGD_2018_STEPS	2	35	1417	24.1991	0.15589	0.0903403	0.0815443	0.0160074	2018	both	National	Bangladesh	South Asia
BGD	BGD_2018_STEPS	2	45	968	23.6645	0.192646	0.131033	0.108055	0.00935507	2018	both	National	Bangladesh	South Asia
BGD	BGD_2018_STEPS	2	55	548	23.3142	0.307632	0.177994	0.116609	0.0215307	2018	both	National	Bangladesh	South Asia
BGD	BGD_2018_STEPS	2	65	217	23.0948	0.65094	0.1387	0.109212	0.00306978	2018	both	National	Bangladesh	South Asia
BHS	BHS_2012_STEPS	1	27.5	110	27.9611	1.8119	0.017728	0.314198	0.151335	2012	both	National	Bahamas	Latin America and Caribbean
BHS	BHS_2012_STEPS	1	35	171	29.8626	0.164291	0.0193557	0.508994	0.144326	2012	both	National	Bahamas	Latin America and Caribbean
BHS	BHS_2012_STEPS	1	45	147	30.1818	0.366333	0.00271608	0.502951	0.132175	2012	both	National	Bahamas	Latin America and Caribbean
BHS	BHS_2012_STEPS	1	55	125	30.7678	0.0954315	0.0059127	0.539697	0.182969	2012	both	National	Bahamas	Latin America and Caribbean
BHS	BHS_2012_STEPS	1	62.5	33	30.7054	0.230321	0	0.48832	0.118125	2012	both	National	Bahamas	Latin America and Caribbean
BHS	BHS_2012_STEPS	2	27.5	132	30.5131	0.815965	0.0146356	0.474864	0.235796	2012	both	National	Bahamas	Latin America and Caribbean
BHS	BHS_2012_STEPS	2	35	274	31.2716	1.37297	0.0344302	0.501839	0.272973	2012	both	National	Bahamas	Latin America and Caribbean
BHS	BHS_2012_STEPS	2	45	293	31.6195	0.275891	0.00652543	0.517606	0.272206	2012	both	National	Bahamas	Latin America and Caribbean
BHS	BHS_2012_STEPS	2	55	175	31.2061	0.865081	0.00143306	0.541874	0.271182	2012	both	National	Bahamas	Latin America and Caribbean
BHS	BHS_2012_STEPS	2	62.5	64	31.4797	0.941144	0	0.481762	0.256871	2012	both	National	Bahamas	Latin America and Caribbean
BLR	BLR_2017_STEPS	1	25	299	24.5494	0.244978	0.026532	0.0656104	0.0147701	2017	both	National	Belarus	Central and Eastern Europe
BLR	BLR_2017_STEPS	1	35	368	26.3404	0.26965	0.0211682	0.160466	0.039368	2017	both	National	Belarus	Central and Eastern Europe
BLR	BLR_2017_STEPS	1	45	487	27.2486	0.20971	0.00498126	0.245195	0.0287079	2017	both	National	Belarus	Central and Eastern Europe
BLR	BLR_2017_STEPS	1	55	545	27.8876	0.232503	0.00412305	0.298885	0.0609441	2017	both	National	Belarus	Central and Eastern Europe
BLR	BLR_2017_STEPS	1	65	354	28.1476	0.256872	0.0181296	0.295458	0.0584204	2017	both	National	Belarus	Central and Eastern Europe
BLR	BLR_2017_STEPS	2	25	315	22.9597	0.285903	0.0778507	0.0684707	0.014343	2017	both	National	Belarus	Central and Eastern Europe
BLR	BLR_2017_STEPS	2	35	489	25.3454	0.27177	0.0386997	0.168186	0.0546532	2017	both	National	Belarus	Central and Eastern Europe
BLR	BLR_2017_STEPS	2	45	656	27.8155	0.277456	0.0186183	0.326916	0.103515	2017	both	National	Belarus	Central and Eastern Europe
BLR	BLR_2017_STEPS	2	55	752	30.0547	0.260493	0.00532955	0.453803	0.178995	2017	both	National	Belarus	Central and Eastern Europe
BLR	BLR_2017_STEPS	2	65	653	30.6909	0.2996	0.00125016	0.501382	0.218692	2017	both	National	Belarus	Central and Eastern Europe
BOL	BOL_1994_DHS	2	25	1153	24.0654	0.1257	0.0265153	0.0708692	0.0151786	1994	both	National	Bolivia	Latin America and Caribbean
BOL	BOL_1994_DHS	2	35	790	24.9145	0.154681	0.0106419	0.100239	0.0162082	1994	both	National	Bolivia	Latin America and Caribbean
BOL	BOL_1994_DHS	2	45	185	25.0428	0.276695	0.0177555	0.0916026	0.020198	1994	both	National	Bolivia	Latin America and Caribbean
BOL	BOL_1998_DHS	2	25	1894	24.7843	0.0978575	0.00928802	0.0824063	0.0137065	1998	both	National	Bolivia	Latin America and Caribbean
BOL	BOL_1998_DHS	2	35	1544	26.0688	0.126685	0.00452849	0.149103	0.0308247	1998	both	National	Bolivia	Latin America and Caribbean
BOL	BOL_1998_DHS	2	45	501	26.2305	0.224992	0.00520759	0.159827	0.0481996	1998	both	National	Bolivia	Latin America and Caribbean
BOL	BOL_2003_DHS	2	25	5240	24.6475	0.0788757	0.021007	0.0937091	0.0235649	2003	both	National	Bolivia	Latin America and Caribbean
BOL	BOL_2003_DHS	2	35	4267	26.6724	0.126543	0.00847833	0.209605	0.0571683	2003	both	National	Bolivia	Latin America and Caribbean
BOL	BOL_2003_DHS	2	45	3217	27.8253	0.141999	0.0043153	0.307586	0.0890091	2003	both	National	Bolivia	Latin America and Caribbean
BOL	BOL_2008_DHS	2	25	4955	24.9677	0.0733492	0.0225311	0.109761	0.0264679	2008	both	National	Bolivia	Latin America and Caribbean
BOL	BOL_2008_DHS	2	35	4113	27.2121	0.0927539	0.00468296	0.243325	0.0637896	2008	both	National	Bolivia	Latin America and Caribbean
BOL	BOL_2008_DHS	2	45	3236	28.1453	0.123359	0.0060269	0.318548	0.101914	2008	both	National	Bolivia	Latin America and Caribbean
BRA	BRA_1996_DHS	2	25	1663	23.6829	0.123007	0.0671814	0.0860392	0.012438	1996	both	National	Brazil	Latin America and Caribbean
BRA	BRA_1996_DHS	2	35	1035	24.8603	0.149333	0.0436851	0.124817	0.0267113	1996	both	National	Brazil	Latin America and Caribbean
BRA	BRA_1996_DHS	2	45	186	24.8616	0.387208	0.0827608	0.128914	0.0141505	1996	both	National	Brazil	Latin America and Caribbean
BRA	BRA_2000_SABE	1	65	259	25.8007	0.269312	0.0232588	0.111731	0.0204575	2000	urban	Community	Brazil	Latin America and Caribbean
BRA	BRA_2000_SABE	1	75	288	25.2221	0.283815	0.0412746	0.124096	0.0163509	2000	urban	Community	Brazil	Latin America and Caribbean
BRA	BRA_2000_SABE	2	65	425	27.701	0.304164	0.0202405	0.303535	0.0928254	2000	urban	Community	Brazil	Latin America and Caribbean
BRA	BRA_2000_SABE	2	75	412	27.4266	0.292853	0.0352465	0.285587	0.0811903	2000	urban	Community	Brazil	Latin America and Caribbean
BRA	BRA_2013_PNS	1	25	5050	25.0449	0.114247	0.026794	0.118139	0.0392871	2013	both	National	Brazil	Latin America and Caribbean
BRA	BRA_2013_PNS	1	35	5845	26.3613	0.104506	0.0189725	0.167235	0.0381281	2013	both	National	Brazil	Latin America and Caribbean
BRA	BRA_2013_PNS	1	45	4910	26.881	0.112812	0.00919833	0.215191	0.0490292	2013	both	National	Brazil	Latin America and Caribbean
BRA	BRA_2013_PNS	1	55	3818	26.9748	0.121155	0.0109876	0.213918	0.0513274	2013	both	National	Brazil	Latin America and Caribbean
BRA	BRA_2013_PNS	1	65	2473	26.6085	0.168797	0.0240173	0.199899	0.04115	2013	both	National	Brazil	Latin America and Caribbean
BRA	BRA_2013_PNS	1	75	1350	25.7918	0.220569	0.0194456	0.154865	0.0289572	2013	both	National	Brazil	Latin America and Caribbean
BRA	BRA_2013_PNS	2	25	6303	24.8419	0.121782	0.0485345	0.153981	0.0509995	2013	both	National	Brazil	Latin America and Caribbean
BRA	BRA_2013_PNS	2	35	7759	27.0564	0.123966	0.0167633	0.247996	0.0987456	2013	both	National	Brazil	Latin America and Caribbean
BRA	BRA_2013_PNS	2	45	6111	27.7658	0.123887	0.013579	0.288077	0.0924501	2013	both	National	Brazil	Latin America and Caribbean
BRA	BRA_2013_PNS	2	55	4868	28.1241	0.132464	0.0159852	0.317393	0.0984192	2013	both	National	Brazil	Latin America and Caribbean
BRA	BRA_2013_PNS	2	65	3500	27.9639	0.171862	0.0202075	0.305475	0.102555	2013	both	National	Brazil	Latin America and Caribbean
BRA	BRA_2013_PNS	2	75	1889	27.2076	0.19403	0.0333091	0.265726	0.0613109	2013	both	National	Brazil	Latin America and Caribbean
BRB	BRB_2000_SABE	1	65	240	25.8512	0.400925	0.0437129	0.143025	0.0442602	2000	urban	Community	Barbados	Latin America and Caribbean
BRB	BRB_2000_SABE	1	75	221	25.5134	0.470036	0.0588752	0.116677	0.0568753	2000	urban	Community	Barbados	Latin America and Caribbean
BRB	BRB_2000_SABE	2	65	364	29.2732	0.376734	0.0158085	0.405752	0.135942	2000	urban	Community	Barbados	Latin America and Caribbean
BRB	BRB_2000_SABE	2	75	315	28.4076	0.447865	0.0376478	0.322691	0.130457	2000	urban	Community	Barbados	Latin America and Caribbean
BTN	BTN_2007_STEPS	1	27.5	119	23.9769	0.288868	0.0252101	0.0252101	0	2007	urban	Community	Bhutan	South Asia
BTN	BTN_2007_STEPS	1	35	278	25.0664	0.247309	0.0143885	0.0647482	0.00359712	2007	urban	Community	Bhutan	South Asia
BTN	BTN_2007_STEPS	1	45	245	26.1923	0.223367	0	0.138776	0.0122449	2007	urban	Community	Bhutan	South Asia
BTN	BTN_2007_STEPS	1	55	253	26.3176	0.251266	0.0316206	0.166008	0.0158103	2007	urban	Community	Bhutan	South Asia
BTN	BTN_2007_STEPS	1	65	152	25.3856	0.355788	0.0526316	0.138158	0.0263158	2007	urban	Community	Bhutan	South Asia
BTN	BTN_2007_STEPS	1	72.5	78	24.5498	0.454174	0.0641026	0.102564	0.0128205	2007	urban	Community	Bhutan	South Asia
BTN	BTN_2007_STEPS	2	27.5	144	24.8649	0.347284	0.0347222	0.0972222	0.0208333	2007	urban	Community	Bhutan	South Asia
BTN	BTN_2007_STEPS	2	35	292	25.9708	0.280623	0.0239726	0.150685	0.0239726	2007	urban	Community	Bhutan	South Asia
BTN	BTN_2007_STEPS	2	45	289	26.657	0.262016	0.0138408	0.211073	0.0415225	2007	urban	Community	Bhutan	South Asia
BTN	BTN_2007_STEPS	2	55	260	26.527	0.276904	0.0192308	0.207692	0.0307692	2007	urban	Community	Bhutan	South Asia
BTN	BTN_2007_STEPS	2	65	223	25.1705	0.302926	0.0538117	0.130045	0.0269058	2007	urban	Community	Bhutan	South Asia
BTN	BTN_2007_STEPS	2	72.5	114	24.4058	0.354939	0.0350877	0.0964912	0	2007	urban	Community	Bhutan	South Asia
BTN	BTN_2014_STEPS	1	25	184	22.2986	0.247928	0.0674153	0.00813014	0	2014	both	National	Bhutan	South Asia
BTN	BTN_2014_STEPS	1	35	303	23.8163	0.231486	0.0217741	0.0438802	0.00157687	2014	both	National	Bhutan	South Asia
BTN	BTN_2014_STEPS	1	45	261	25.0246	0.424751	0.0408724	0.118124	0.0190922	2014	both	National	Bhutan	South Asia
BTN	BTN_2014_STEPS	1	55	192	23.5023	0.30341	0.0493066	0.0277106	0.0130202	2014	both	National	Bhutan	South Asia
BTN	BTN_2014_STEPS	1	65	118	23.636	0.302975	0.0255413	0.0302755	0	2014	both	National	Bhutan	South Asia
BTN	BTN_2014_STEPS	2	25	388	23.7536	0.188737	0.0602515	0.0494808	0.00622786	2014	both	National	Bhutan	South Asia
BTN	BTN_2014_STEPS	2	35	488	24.9002	0.228599	0.0161285	0.0856661	0.0125289	2014	both	National	Bhutan	South Asia
BTN	BTN_2014_STEPS	2	45	386	25.3353	0.329221	0.014055	0.126	0.0250658	2014	both	National	Bhutan	South Asia
BTN	BTN_2014_STEPS	2	55	250	25.0933	0.378358	0.0129934	0.142429	0.0108247	2014	both	National	Bhutan	South Asia
BTN	BTN_2014_STEPS	2	65	134	23.8507	0.343554	0.0186651	0.0664094	0.0102846	2014	both	National	Bhutan	South Asia
BWA	BWA_2007_STEPS	1	27.5	361	21.2798	0.187265	0.213296	0.0277008	0	2007	both	National	Botswana	Sub-Saharan Africa
BWA	BWA_2007_STEPS	1	35	444	22.579	0.246673	0.184685	0.0563063	0.0135135	2007	both	National	Botswana	Sub-Saharan Africa
BWA	BWA_2007_STEPS	1	45	219	22.8038	0.308978	0.196347	0.0821918	0	2007	both	National	Botswana	Sub-Saharan Africa
BWA	BWA_2007_STEPS	1	55	160	22.0638	0.38591	0.20625	0.05625	0.0125	2007	both	National	Botswana	Sub-Saharan Africa
BWA	BWA_2007_STEPS	1	62.5	59	22.8287	0.723567	0.169492	0.0847458	0.0338983	2007	both	National	Botswana	Sub-Saharan Africa
BWA	BWA_2007_STEPS	2	27.5	624	23.9507	0.209613	0.13141	0.134615	0.0352564	2007	both	National	Botswana	Sub-Saharan Africa
BWA	BWA_2007_STEPS	2	35	812	25.8545	0.210939	0.067734	0.210591	0.0689655	2007	both	National	Botswana	Sub-Saharan Africa
BWA	BWA_2007_STEPS	2	45	575	27.2049	0.288666	0.0765217	0.290435	0.107826	2007	both	National	Botswana	Sub-Saharan Africa
BWA	BWA_2007_STEPS	2	55	402	27.9709	0.354459	0.0746269	0.348259	0.124378	2007	both	National	Botswana	Sub-Saharan Africa
BWA	BWA_2007_STEPS	2	62.5	164	28.1222	0.529451	0.0426829	0.329268	0.158537	2007	both	National	Botswana	Sub-Saharan Africa
BWA	BWA_2014_STEPS	1	25	428	20.8637	0.23983	0.243264	0.0340684	0.00425194	2014	both	National	Botswana	Sub-Saharan Africa
BWA	BWA_2014_STEPS	1	35	299	22.4725	0.354302	0.154608	0.0540428	0.00791978	2014	both	National	Botswana	Sub-Saharan Africa
BWA	BWA_2014_STEPS	1	45	209	23.758	0.444835	0.0929364	0.0920365	0.0199472	2014	both	National	Botswana	Sub-Saharan Africa
BWA	BWA_2014_STEPS	1	55	149	22.8881	0.533302	0.196974	0.0911897	0.0327607	2014	both	National	Botswana	Sub-Saharan Africa
BWA	BWA_2014_STEPS	1	65	87	23.7763	0.582039	0.160451	0.102843	0.0555409	2014	both	National	Botswana	Sub-Saharan Africa
BWA	BWA_2014_STEPS	2	25	723	23.4081	0.26833	0.140147	0.10903	0.0344002	2014	both	National	Botswana	Sub-Saharan Africa
BWA	BWA_2014_STEPS	2	35	636	26.2064	0.330661	0.0584771	0.229871	0.0958458	2014	both	National	Botswana	Sub-Saharan Africa
BWA	BWA_2014_STEPS	2	45	450	27.4207	0.571194	0.0824921	0.321412	0.132469	2014	both	National	Botswana	Sub-Saharan Africa
BWA	BWA_2014_STEPS	2	55	363	27.7064	0.481827	0.0639307	0.335264	0.12723	2014	both	National	Botswana	Sub-Saharan Africa
BWA	BWA_2014_STEPS	2	65	224	27.4433	0.519846	0.0535925	0.257798	0.095011	2014	both	National	Botswana	Sub-Saharan Africa
CAF	CAF_1995_DHS	2	25	1043	21.0315	0.0794089	0.142783	0.0103017	0.000996109	1995	both	National	Central African Republic	Sub-Saharan Africa
CAF	CAF_1995_DHS	2	35	601	20.9767	0.13127	0.170742	0.0148195	0.00158959	1995	both	National	Central African Republic	Sub-Saharan Africa
CAF	CAF_1995_DHS	2	45	116	21.2237	0.268124	0.157708	0	0	1995	both	National	Central African Republic	Sub-Saharan Africa
CAF	CAF_2010_STEPS	1	27.5	387	21.0563	0.283694	0.166581	0.0162003	0.00596118	2010	both	Subnational	Central African Republic	Sub-Saharan Africa
CAF	CAF_2010_STEPS	1	35	512	21.2249	0.221399	0.172841	0.0179919	0.00126632	2010	both	Subnational	Central African Republic	Sub-Saharan Africa
CAF	CAF_2010_STEPS	1	45	422	21.4893	0.269873	0.236346	0.0377691	0.0115978	2010	both	Subnational	Central African Republic	Sub-Saharan Africa
CAF	CAF_2010_STEPS	1	55	341	22.2329	0.332037	0.19747	0.0510502	0.0117772	2010	both	Subnational	Central African Republic	Sub-Saharan Africa
CAF	CAF_2010_STEPS	1	62.5	184	22.4287	0.851185	0.214935	0.0696521	0.0366049	2010	both	Subnational	Central African Republic	Sub-Saharan Africa
CAF	CAF_2010_STEPS	2	27.5	456	22.1637	0.210247	0.174531	0.0672946	0.0213961	2010	both	Subnational	Central African Republic	Sub-Saharan Africa
CAF	CAF_2010_STEPS	2	35	589	22.4497	0.251831	0.18339	0.0891089	0.0185191	2010	both	Subnational	Central African Republic	Sub-Saharan Africa
CAF	CAF_2010_STEPS	2	45	432	23.7445	0.392033	0.160268	0.160076	0.0458812	2010	both	Subnational	Central African Republic	Sub-Saharan Africa
CAF	CAF_2010_STEPS	2	55	317	23.7434	0.480303	0.165462	0.152218	0.058703	2010	both	Subnational	Central African Republic	Sub-Saharan Africa
CAF	CAF_2010_STEPS	2	62.5	173	24.2312	0.592971	0.10583	0.151341	0.0358253	2010	both	Subnational	Central African Republic	Sub-Saharan Africa
CAN	CAN_1985_INTERSALT-StJohns	1	25	25	24.5376	0.653027	0	0.08	0	1985	urban	Community	Canada	High-income Western countries
CAN	CAN_1985_INTERSALT-StJohns	1	35	25	26.0788	0.706436	0	0.08	0	1985	urban	Community	Canada	High-income Western countries
CAN	CAN_1985_INTERSALT-StJohns	1	45	25	25.9128	0.924514	0	0.24	0.08	1985	urban	Community	Canada	High-income Western countries
CAN	CAN_1985_INTERSALT-StJohns	1	55	25	26.3992	0.878323	0	0.2	0.04	1985	urban	Community	Canada	High-income Western countries
CAN	CAN_1985_INTERSALT-StJohns	2	25	25	23.1027	0.81404	0.08	0.08	0.04	1985	urban	Community	Canada	High-income Western countries
CAN	CAN_1985_INTERSALT-StJohns	2	35	25	23.1169	0.602644	0.04	0.04	0	1985	urban	Community	Canada	High-income Western countries
CAN	CAN_1985_INTERSALT-StJohns	2	45	25	26.3479	0.999833	0	0.16	0.04	1985	urban	Community	Canada	High-income Western countries
CAN	CAN_1985_INTERSALT-StJohns	2	55	25	26.34	0.824929	0.04	0.16	0	1985	urban	Community	Canada	High-income Western countries
CAN	CAN_1987_MONICA-HALa	2	27.5	25	23.5084	0.735176	0.04	0.08	0.04	1987	both	Community	Canada	High-income Western countries
CAN	CAN_1987_MONICA-HALa	2	35	103	24.7131	0.464389	0.00970874	0.126214	0.0388349	1987	both	Community	Canada	High-income Western countries
CAN	CAN_1987_MONICA-HALa	2	45	113	24.6577	0.44501	0.0530973	0.123894	0.0353982	1987	both	Community	Canada	High-income Western countries
CAN	CAN_1987_MONICA-HALa	2	55	125	26.6352	0.457137	0.016	0.208	0.072	1987	both	Community	Canada	High-income Western countries
CAN	CAN_1987_MONICA-HALa	2	62.5	54	26.8001	0.508357	0	0.203704	0.0555556	1987	both	Community	Canada	High-income Western countries
CAN	CAN_1987_MONICA-HALa	1	27.5	25	25.2403	0.896451	0.04	0.04	0.04	1987	both	Community	Canada	High-income Western countries
CAN	CAN_1987_MONICA-HALa	1	35	108	26.1657	0.346187	0	0.12037	0.0185185	1987	both	Community	Canada	High-income Western countries
CAN	CAN_1987_MONICA-HALa	1	45	128	27.0039	0.395988	0.0078125	0.210938	0.0546875	1987	both	Community	Canada	High-income Western countries
CAN	CAN_1987_MONICA-HALa	1	55	119	27.4765	0.332773	0.00840336	0.159664	0.0420168	1987	both	Community	Canada	High-income Western countries
CAN	CAN_1987_MONICA-HALa	1	62.5	58	26.3931	0.486582	0	0.137931	0.0344828	1987	both	Community	Canada	High-income Western countries
CAN	CAN_1995_MONICA-HALa	2	27.5	26	24.546	0.822605	0.0384615	0.192308	0.0769231	1995	both	Community	Canada	High-income Western countries
CAN	CAN_1995_MONICA-HALa	2	35	69	25.3995	0.253319	0.0289855	0.188406	0.057971	1995	both	Community	Canada	High-income Western countries
CAN	CAN_1995_MONICA-HALa	2	45	82	28.2204	0.341811	0	0.243902	0.134146	1995	both	Community	Canada	High-income Western countries
CAN	CAN_1995_MONICA-HALa	2	55	75	27.4372	0.770202	0.0133333	0.306667	0.0533333	1995	both	Community	Canada	High-income Western countries
CAN	CAN_1995_MONICA-HALa	2	62.5	35	27.6645	0.910218	0	0.285714	0.0857143	1995	both	Community	Canada	High-income Western countries
CAN	CAN_1995_MONICA-HALa	1	27.5	23	25.7648	0.503323	0	0.173913	0	1995	both	Community	Canada	High-income Western countries
CAN	CAN_1995_MONICA-HALa	1	35	68	27.2422	0.384934	0	0.264706	0.0588235	1995	both	Community	Canada	High-income Western countries
CAN	CAN_1995_MONICA-HALa	1	45	69	26.8362	0.386071	0	0.246377	0.057971	1995	both	Community	Canada	High-income Western countries
CAN	CAN_1995_MONICA-HALa	1	55	76	27.5167	0.295231	0	0.223684	0.0263158	1995	both	Community	Canada	High-income Western countries
CAN	CAN_1995_MONICA-HALa	1	62.5	38	29.9575	0.189935	0	0.447368	0.131579	1995	both	Community	Canada	High-income Western countries
CHE	CHE_1985_MONICA	1	27.5	105	24.4183	0.38483	0.0190476	0.0666667	0.00952381	1985	both	Subnational	Switzerland	High-income Western countries
CHE	CHE_1985_MONICA	1	35	408	25.4368	0.174212	0.00490196	0.0906863	0.00980392	1985	both	Subnational	Switzerland	High-income Western countries
CHE	CHE_1985_MONICA	1	45	536	26.5296	0.179823	0	0.152985	0.016791	1985	both	Subnational	Switzerland	High-income Western countries
CHE	CHE_1985_MONICA	1	55	412	27.533	0.153449	0	0.203883	0.0339806	1985	both	Subnational	Switzerland	High-income Western countries
CHE	CHE_1985_MONICA	1	65	228	27.2643	0.302966	0	0.232456	0.0175439	1985	both	Subnational	Switzerland	High-income Western countries
CHE	CHE_1985_MONICA	1	72.5	55	26.1415	0.332532	0.0181818	0.0909091	0	1985	both	Subnational	Switzerland	High-income Western countries
CHE	CHE_1985_MONICA	2	27.5	106	22.0871	0.335833	0.0754717	0.00943396	0	1985	both	Subnational	Switzerland	High-income Western countries
CHE	CHE_1985_MONICA	2	35	416	23.5241	0.237678	0.0360577	0.0480769	0.0144231	1985	both	Subnational	Switzerland	High-income Western countries
CHE	CHE_1985_MONICA	2	45	489	24.6174	0.23139	0.0163599	0.0981595	0.0286299	1985	both	Subnational	Switzerland	High-income Western countries
CHE	CHE_1985_MONICA	2	55	383	26.4273	0.224083	0.0208877	0.219321	0.0469974	1985	both	Subnational	Switzerland	High-income Western countries
CHE	CHE_1985_MONICA	2	65	231	26.3731	0.613987	0.025974	0.203463	0.047619	1985	both	Subnational	Switzerland	High-income Western countries
CHE	CHE_1985_MONICA	2	72.5	64	25.8593	0.808528	0.078125	0.21875	0.046875	1985	both	Subnational	Switzerland	High-income Western countries
CHE	CHE_1989_MONICA	1	27.5	121	24.3717	0.203027	0.00826446	0.0495868	0.00826446	1989	both	Subnational	Switzerland	High-income Western countries
CHE	CHE_1989_MONICA	1	35	391	24.967	0.128958	0.00255754	0.0537084	0.00255754	1989	both	Subnational	Switzerland	High-income Western countries
CHE	CHE_1989_MONICA	1	45	538	25.8526	0.107157	0.00371747	0.100372	0.00929368	1989	both	Subnational	Switzerland	High-income Western countries
CHE	CHE_1989_MONICA	1	55	447	26.8003	0.205089	0.00223714	0.154362	0.0134228	1989	both	Subnational	Switzerland	High-income Western countries
CHE	CHE_1989_MONICA	1	65	238	26.9797	0.204198	0.0168067	0.193277	0.0336134	1989	both	Subnational	Switzerland	High-income Western countries
CHE	CHE_1989_MONICA	1	72.5	43	26.037	0.546716	0.0232558	0.139535	0.0232558	1989	both	Subnational	Switzerland	High-income Western countries
CHE	CHE_1989_MONICA	2	27.5	120	22.6473	0.455641	0.075	0.0333333	0.00833333	1989	both	Subnational	Switzerland	High-income Western countries
CHE	CHE_1989_MONICA	2	35	353	22.9679	0.199058	0.0509915	0.0368272	0.0141643	1989	both	Subnational	Switzerland	High-income Western countries
CHE	CHE_1989_MONICA	2	45	511	24.1352	0.159999	0.035225	0.0802348	0.0176125	1989	both	Subnational	Switzerland	High-income Western countries
CHE	CHE_1989_MONICA	2	55	401	25.8456	0.219207	0.0249377	0.147132	0.0498753	1989	both	Subnational	Switzerland	High-income Western countries
CHE	CHE_1989_MONICA	2	65	250	26.5608	0.36493	0.02	0.196	0.08	1989	both	Subnational	Switzerland	High-income Western countries
CHE	CHE_1989_MONICA	2	72.5	49	25.9338	0.585036	0.0816327	0.22449	0	1989	both	Subnational	Switzerland	High-income Western countries
CHE	CHE_1993_MONICA	1	27.5	86	24.2988	0.442942	0.0116279	0.0697674	0.0116279	1993	both	Subnational	Switzerland	High-income Western countries
CHE	CHE_1993_MONICA	1	35	350	25.1143	0.171038	0.0114286	0.0771429	0.00857143	1993	both	Subnational	Switzerland	High-income Western countries
CHE	CHE_1993_MONICA	1	45	518	26.6963	0.131666	0.003861	0.162162	0.023166	1993	both	Subnational	Switzerland	High-income Western countries
CHE	CHE_1993_MONICA	1	55	387	26.7154	0.193844	0.00516796	0.157623	0.0129199	1993	both	Subnational	Switzerland	High-income Western countries
CHE	CHE_1993_MONICA	1	65	197	27.3387	0.265617	0.00507614	0.177665	0.0304569	1993	both	Subnational	Switzerland	High-income Western countries
CHE	CHE_1993_MONICA	1	72.5	39	27.7123	0.525551	0	0.333333	0.025641	1993	both	Subnational	Switzerland	High-income Western countries
CHE	CHE_1993_MONICA	2	27.5	101	22.758	0.409091	0.049505	0.0594059	0.00990099	1993	both	Subnational	Switzerland	High-income Western countries
CHE	CHE_1993_MONICA	2	35	361	23.1219	0.203479	0.0415512	0.0637119	0.0110803	1993	both	Subnational	Switzerland	High-income Western countries
CHE	CHE_1993_MONICA	2	45	512	24.4035	0.201079	0.0214844	0.0957031	0.0234375	1993	both	Subnational	Switzerland	High-income Western countries
CHE	CHE_1993_MONICA	2	55	424	26.0808	0.222225	0.00943396	0.169811	0.0566038	1993	both	Subnational	Switzerland	High-income Western countries
CHE	CHE_1993_MONICA	2	65	228	27.6116	0.305597	0.00877193	0.280702	0.0745614	1993	both	Subnational	Switzerland	High-income Western countries
CHE	CHE_1993_MONICA	2	72.5	46	26.4697	0.773634	0.0217391	0.173913	0.0434783	1993	both	Subnational	Switzerland	High-income Western countries
CHL	CHL_2000_SABE	1	65	216	28.1836	0.423456	0.00341643	0.343024	0.0705224	2000	urban	Community	Chile	Latin America and Caribbean
CHL	CHL_2000_SABE	1	75	141	26.7338	0.391654	0.0037076	0.197028	0.0319379	2000	urban	Community	Chile	Latin America and Caribbean
CHL	CHL_2000_SABE	2	65	364	29.241	0.232584	0.00744226	0.387942	0.14645	2000	urban	Community	Chile	Latin America and Caribbean
CHL	CHL_2000_SABE	2	75	282	28.1486	0.501758	0.0137606	0.319724	0.0953098	2000	urban	Community	Chile	Latin America and Caribbean
CHN	CHN_1985_SinoMONICA-BJ	1	27.5	89	21.8975	0.29521	0.079	0	0	1985	both	Community	China	East and South East Asia
CHN	CHN_1985_SinoMONICA-BJ	2	27.5	105	21.6095	0.23479	0.067	0.01	0	1985	both	Community	China	East and South East Asia
CHN	CHN_1985_SinoMONICA-BJ	1	35	209	22.854	0.22252	0.024	0.015	0.005	1985	both	Community	China	East and South East Asia
CHN	CHN_1985_SinoMONICA-BJ	2	35	211	22.8785	0.22418	0.071	0.043	0	1985	both	Community	China	East and South East Asia
CHN	CHN_1985_SinoMONICA-BJ	1	45	217	23.4037	0.20737	0.041	0.028	0.005	1985	both	Community	China	East and South East Asia
CHN	CHN_1985_SinoMONICA-BJ	2	45	224	24.5892	0.24087	0.031	0.071	0.013	1985	both	Community	China	East and South East Asia
CHN	CHN_1985_SinoMONICA-BJ	1	55	221	23.615	0.22059	0.037	0.032	0	1985	both	Community	China	East and South East Asia
CHN	CHN_1985_SinoMONICA-BJ	2	55	221	25.1815	0.28296	0.041	0.123	0.01	1985	both	Community	China	East and South East Asia
CHN	CHN_1985_SinoMONICA-BJ	1	62.5	77	24.315	0.42643	0.039	0.065	0.013	1985	both	Community	China	East and South East Asia
CHN	CHN_1985_SinoMONICA-BJ	2	62.5	96	24.6075	0.47869	0.073	0.136	0.021	1985	both	Community	China	East and South East Asia
CHN	CHN_1986_INTERSALT-Beijing	1	25	25	21.2118	0.350239	0.08	0	0	1986	urban	Community	China	East and South East Asia
CHN	CHN_1986_INTERSALT-Beijing	1	35	25	22.46	0.369053	0	0	0	1986	urban	Community	China	East and South East Asia
CHN	CHN_1986_INTERSALT-Beijing	1	45	25	22.8506	0.358141	0	0	0	1986	urban	Community	China	East and South East Asia
CHN	CHN_1986_INTERSALT-Beijing	1	55	25	23.7833	0.491557	0	0	0	1986	urban	Community	China	East and South East Asia
CHN	CHN_1986_INTERSALT-Beijing	2	25	25	20.6943	0.419042	0.16	0	0	1986	urban	Community	China	East and South East Asia
CHN	CHN_1986_INTERSALT-Beijing	2	35	25	22.5413	0.560578	0.04	0	0	1986	urban	Community	China	East and South East Asia
CHN	CHN_1986_INTERSALT-Beijing	2	45	25	24.805	0.725735	0.04	0.04	0	1986	urban	Community	China	East and South East Asia
CHN	CHN_1986_INTERSALT-Beijing	2	55	25	23.6995	0.684069	0.04	0.08	0	1986	urban	Community	China	East and South East Asia
CHN	CHN_1986_INTERSALT-Nanning	1	25	25	19.4449	0.318483	0.24	0	0	1986	both	Community	China	East and South East Asia
CHN	CHN_1986_INTERSALT-Nanning	1	35	25	21.0485	0.423064	0.12	0	0	1986	both	Community	China	East and South East Asia
CHN	CHN_1986_INTERSALT-Nanning	1	45	25	21.9439	0.470192	0.08	0	0	1986	both	Community	China	East and South East Asia
CHN	CHN_1986_INTERSALT-Nanning	1	55	25	22.6171	0.511084	0	0	0	1986	both	Community	China	East and South East Asia
CHN	CHN_1986_INTERSALT-Nanning	2	25	25	19.9364	0.350949	0.16	0	0	1986	both	Community	China	East and South East Asia
CHN	CHN_1986_INTERSALT-Nanning	2	35	25	22.0028	0.626	0.04	0	0	1986	both	Community	China	East and South East Asia
CHN	CHN_1986_INTERSALT-Nanning	2	45	25	21.6182	0.622224	0.12	0	0	1986	both	Community	China	East and South East Asia
CHN	CHN_1986_INTERSALT-Nanning	2	55	25	22.015	0.531379	0.12	0	0	1986	both	Community	China	East and South East Asia
CHN	CHN_1986_INTERSALT-Tianjin	1	25	25	22.1248	0.509191	0.08	0	0	1986	urban	Community	China	East and South East Asia
CHN	CHN_1986_INTERSALT-Tianjin	1	35	25	23.5999	0.518875	0	0.04	0	1986	urban	Community	China	East and South East Asia
CHN	CHN_1986_INTERSALT-Tianjin	1	45	25	24.1724	0.476543	0	0	0	1986	urban	Community	China	East and South East Asia
CHN	CHN_1986_INTERSALT-Tianjin	1	55	25	24.5009	0.662966	0	0.08	0	1986	urban	Community	China	East and South East Asia
CHN	CHN_1986_INTERSALT-Tianjin	2	25	25	22.8733	0.437681	0	0	0	1986	urban	Community	China	East and South East Asia
CHN	CHN_1986_INTERSALT-Tianjin	2	35	25	22.6825	0.630913	0.04	0.04	0	1986	urban	Community	China	East and South East Asia
CHN	CHN_1986_INTERSALT-Tianjin	2	45	25	25.2924	0.812096	0.04	0.12	0	1986	urban	Community	China	East and South East Asia
CHN	CHN_1986_INTERSALT-Tianjin	2	55	25	25.6975	1.11062	0.12	0.2	0.12	1986	urban	Community	China	East and South East Asia
CHN	CHN_1989_CHNS	1	25	990	20.7942	0.0915087	0.10101	0.0020202	0	1989	both	National	China	East and South East Asia
CHN	CHN_1989_CHNS	1	35	967	21.4931	0.106054	0.073423	0.00310238	0	1989	both	National	China	East and South East Asia
CHN	CHN_1989_CHNS	1	43	400	21.8024	0.157074	0.09	0.0025	0	1989	both	National	China	East and South East Asia
CHN	CHN_1989_CHNS	2	25	1061	21.2578	0.0857581	0.109331	0.00188501	0.000942507	1989	both	National	China	East and South East Asia
CHN	CHN_1989_CHNS	2	35	1072	21.9263	0.0910001	0.0699627	0.00466418	0	1989	both	National	China	East and South East Asia
CHN	CHN_1989_CHNS	2	43	418	22.4539	0.174734	0.0550239	0.0143541	0	1989	both	National	China	East and South East Asia
CHN	CHN_1991_CHNS	1	25	1004	20.949	0.0921239	0.0946215	0.00298805	0	1991	both	National	China	East and South East Asia
CHN	CHN_1991_CHNS	1	35	948	21.6686	0.100311	0.0706751	0.00316456	0	1991	both	National	China	East and South East Asia
CHN	CHN_1991_CHNS	1	45	763	21.7468	0.12076	0.0642202	0.0078637	0	1991	both	National	China	East and South East Asia
CHN	CHN_1991_CHNS	1	55	547	22.0537	0.162348	0.0968921	0.0164534	0	1991	both	National	China	East and South East Asia
CHN	CHN_1991_CHNS	1	65	416	21.6693	0.225548	0.185096	0.0144231	0.00240385	1991	both	National	China	East and South East Asia
CHN	CHN_1991_CHNS	1	75	149	21.2184	0.320863	0.208054	0.0201342	0	1991	both	National	China	East and South East Asia
CHN	CHN_1991_CHNS	2	25	1114	21.1511	0.0866091	0.103232	0.000897666	0	1991	both	National	China	East and South East Asia
CHN	CHN_1991_CHNS	2	35	1072	22.0181	0.107472	0.0662313	0.00746269	0	1991	both	National	China	East and South East Asia
CHN	CHN_1991_CHNS	2	45	811	22.5735	0.14301	0.0690506	0.0246609	0.00246609	1991	both	National	China	East and South East Asia
CHN	CHN_1991_CHNS	2	55	595	22.5018	0.215568	0.110924	0.0420168	0.00336134	1991	both	National	China	East and South East Asia
CHN	CHN_1991_CHNS	2	65	411	22.3363	0.229886	0.160584	0.0291971	0.00486618	1991	both	National	China	East and South East Asia
CHN	CHN_1991_CHNS	2	75	206	21.0681	0.250542	0.208738	0.0242718	0	1991	both	National	China	East and South East Asia
CHN	CHN_1993_CHNS	1	25	870	21.1127	0.0886154	0.0885057	0.00574713	0	1993	both	National	China	East and South East Asia
CHN	CHN_1993_CHNS	1	35	879	21.8813	0.0989753	0.0489192	0.00341297	0	1993	both	National	China	East and South East Asia
CHN	CHN_1993_CHNS	1	45	815	22.0672	0.113068	0.0564417	0.00490798	0	1993	both	National	China	East and South East Asia
CHN	CHN_1993_CHNS	1	55	520	22.1074	0.158921	0.0807692	0.0115385	0	1993	both	National	China	East and South East Asia
CHN	CHN_1993_CHNS	1	65	431	21.8126	0.188149	0.148492	0.0162413	0.00232019	1993	both	National	China	East and South East Asia
CHN	CHN_1993_CHNS	1	75	147	21.3362	0.280552	0.156463	0.00680272	0	1993	both	National	China	East and South East Asia
CHN	CHN_1993_CHNS	2	25	903	21.0353	0.0889032	0.111849	0.00332226	0	1993	both	National	China	East and South East Asia
CHN	CHN_1993_CHNS	2	35	1045	22.0233	0.106383	0.076555	0.00287081	0	1993	both	National	China	East and South East Asia
CHN	CHN_1993_CHNS	2	45	870	22.7837	0.136186	0.0471264	0.016092	0.00114943	1993	both	National	China	East and South East Asia
CHN	CHN_1993_CHNS	2	55	575	22.5419	0.193903	0.0973913	0.0278261	0.00347826	1993	both	National	China	East and South East Asia
CHN	CHN_1993_CHNS	2	65	420	22.6805	0.218198	0.107143	0.0261905	0.0047619	1993	both	National	China	East and South East Asia
CHN	CHN_1993_CHNS	2	75	188	21.3199	0.274817	0.18617	0.0212766	0	1993	both	National	China	East and South East Asia
CHN	CHN_1997_CHNS	1	25	877	21.4297	0.119381	0.0923603	0.00570125	0	1997	both	National	China	East and South East Asia
CHN	CHN_1997_CHNS	1	35	863	22.4518	0.110802	0.0475087	0.00811124	0	1997	both	National	China	East and South East Asia
CHN	CHN_1997_CHNS	1	45	946	22.5831	0.116424	0.0401691	0.012685	0	1997	both	National	China	East and South East Asia
CHN	CHN_1997_CHNS	1	55	611	22.3824	0.15297	0.0801964	0.0180033	0	1997	both	National	China	East and South East Asia
CHN	CHN_1997_CHNS	1	65	464	22.51	0.206379	0.112069	0.0344828	0.00215517	1997	both	National	China	East and South East Asia
CHN	CHN_1997_CHNS	1	75	213	22.1131	0.274907	0.131455	0.0140845	0	1997	both	National	China	East and South East Asia
CHN	CHN_1997_CHNS	2	25	805	21.3671	0.113267	0.0906832	0.00993789	0	1997	both	National	China	East and South East Asia
CHN	CHN_1997_CHNS	2	35	974	22.5711	0.118666	0.0359343	0.0143737	0.00102669	1997	both	National	China	East and South East Asia
CHN	CHN_1997_CHNS	2	45	1042	22.9723	0.121368	0.0527831	0.0134357	0.000959693	1997	both	National	China	East and South East Asia
CHN	CHN_1997_CHNS	2	55	644	23.0177	0.192461	0.0838509	0.0434783	0.0015528	1997	both	National	China	East and South East Asia
CHN	CHN_1997_CHNS	2	65	519	23.0055	0.223479	0.11368	0.0539499	0.00578035	1997	both	National	China	East and South East Asia
CHN	CHN_1997_CHNS	2	75	229	22.0327	0.250732	0.144105	0.0349345	0.00436681	1997	both	National	China	East and South East Asia
CHN	CHN_1997_INTERMAP-Beijing	1	45	67	23.0065	0.318452	0.0447761	0	0	1997	rural	Community	China	East and South East Asia
CHN	CHN_1997_INTERMAP-Beijing	1	55	66	22.8078	0.334325	0.030303	0	0	1997	rural	Community	China	East and South East Asia
CHN	CHN_1997_INTERMAP-Beijing	2	45	70	24.6727	0.439388	0.0285714	0.0571429	0.0142857	1997	rural	Community	China	East and South East Asia
CHN	CHN_1997_INTERMAP-Beijing	2	55	69	24.8273	0.447818	0.0289855	0.101449	0	1997	rural	Community	China	East and South East Asia
CHN	CHN_1997_INTERMAP-Guangxi	1	45	70	22.2629	0.262353	0.0142857	0	0	1997	rural	Community	China	East and South East Asia
CHN	CHN_1997_INTERMAP-Guangxi	1	55	70	21.0908	0.292567	0.114286	0.0142857	0	1997	rural	Community	China	East and South East Asia
CHN	CHN_1997_INTERMAP-Guangxi	2	45	69	22.3389	0.348871	0.057971	0.0144928	0	1997	rural	Community	China	East and South East Asia
CHN	CHN_1997_INTERMAP-Guangxi	2	55	69	21.6845	0.335577	0.0869565	0.0144928	0	1997	rural	Community	China	East and South East Asia
CHN	CHN_1997_INTERMAP-Shanxi	1	45	73	22.8428	0.381138	0.0136986	0.0410959	0	1997	rural	Community	China	East and South East Asia
CHN	CHN_1997_INTERMAP-Shanxi	1	55	70	22.2834	0.324976	0.0285714	0	0	1997	rural	Community	China	East and South East Asia
CHN	CHN_1997_INTERMAP-Shanxi	2	45	76	24.9463	0.437226	0.0394737	0.0789474	0.0131579	1997	rural	Community	China	East and South East Asia
CHN	CHN_1997_INTERMAP-Shanxi	2	55	70	24.6704	0.476166	0.0428571	0.0857143	0	1997	rural	Community	China	East and South East Asia
CHN	CHN_2000_CHNS	1	25	728	21.8688	0.139273	0.081044	0.0164835	0.00137363	2000	both	National	China	East and South East Asia
CHN	CHN_2000_CHNS	1	35	1004	23.005	0.127115	0.0458167	0.0229084	0.000996016	2000	both	National	China	East and South East Asia
CHN	CHN_2000_CHNS	1	45	1030	23.112	0.117065	0.0300971	0.0194175	0	2000	both	National	China	East and South East Asia
CHN	CHN_2000_CHNS	1	55	784	22.9022	0.139388	0.0510204	0.0204082	0	2000	both	National	China	East and South East Asia
CHN	CHN_2000_CHNS	1	65	511	22.7476	0.179658	0.0821918	0.0215264	0.00195695	2000	both	National	China	East and South East Asia
CHN	CHN_2000_CHNS	1	75	266	22.5663	0.26152	0.112782	0.0338346	0.0112782	2000	both	National	China	East and South East Asia
CHN	CHN_2000_CHNS	2	25	720	21.4007	0.122409	0.130556	0.0111111	0	2000	both	National	China	East and South East Asia
CHN	CHN_2000_CHNS	2	35	1140	22.7904	0.120516	0.0491228	0.0184211	0.00175439	2000	both	National	China	East and South East Asia
CHN	CHN_2000_CHNS	2	45	1199	23.5505	0.119222	0.0333611	0.0266889	0.000834028	2000	both	National	China	East and South East Asia
CHN	CHN_2000_CHNS	2	55	800	23.7972	0.150014	0.045	0.0475	0.005	2000	both	National	China	East and South East Asia
CHN	CHN_2000_CHNS	2	65	592	23.2875	0.19699	0.097973	0.0608108	0.00168919	2000	both	National	China	East and South East Asia
CHN	CHN_2000_CHNS	2	75	295	22.7735	0.256633	0.122034	0.040678	0.0135593	2000	both	National	China	East and South East Asia
CHN	CHN_2004_CHNS	1	25	508	22.2018	0.159377	0.0767717	0.0275591	0	2004	both	National	China	East and South East Asia
CHN	CHN_2004_CHNS	1	35	825	23.026	0.130268	0.049697	0.0230303	0.00121212	2004	both	National	China	East and South East Asia
CHN	CHN_2004_CHNS	1	45	982	23.4852	0.117526	0.0213849	0.0356415	0	2004	both	National	China	East and South East Asia
CHN	CHN_2004_CHNS	1	55	968	23.2058	0.128096	0.0423554	0.0165289	0.00103306	2004	both	National	China	East and South East Asia
CHN	CHN_2004_CHNS	1	65	579	22.9525	0.170159	0.0725389	0.0224525	0.00345423	2004	both	National	China	East and South East Asia
CHN	CHN_2004_CHNS	1	75	332	22.4732	0.240213	0.11747	0.0240964	0.00301205	2004	both	National	China	East and South East Asia
CHN	CHN_2004_CHNS	2	25	461	21.2091	0.129198	0.123644	0.00433839	0	2004	both	National	China	East and South East Asia
CHN	CHN_2004_CHNS	2	35	952	22.8466	0.126174	0.0420168	0.0346639	0.0052521	2004	both	National	China	East and South East Asia
CHN	CHN_2004_CHNS	2	45	1113	23.5825	0.120497	0.0314465	0.0395328	0.00269542	2004	both	National	China	East and South East Asia
CHN	CHN_2004_CHNS	2	55	1068	23.8406	0.133756	0.0496255	0.0458801	0.00187266	2004	both	National	China	East and South East Asia
CHN	CHN_2004_CHNS	2	65	633	23.572	0.192051	0.0995261	0.0647709	0.00631912	2004	both	National	China	East and South East Asia
CHN	CHN_2004_CHNS	2	75	358	23.2684	0.289517	0.128492	0.075419	0.00837989	2004	both	National	China	East and South East Asia
CHN	CHN_2006_CHNS	1	25	377	22.6252	0.181567	0.0875332	0.0265252	0	2006	both	National	China	East and South East Asia
CHN	CHN_2006_CHNS	1	35	749	23.3286	0.138251	0.0480641	0.0440587	0.00133511	2006	both	National	China	East and South East Asia
CHN	CHN_2006_CHNS	1	45	972	23.6449	0.118637	0.0246914	0.0360082	0	2006	both	National	China	East and South East Asia
CHN	CHN_2006_CHNS	1	55	1017	23.3024	0.114845	0.0314651	0.020649	0.000983284	2006	both	National	China	East and South East Asia
CHN	CHN_2006_CHNS	1	65	620	22.9085	0.167192	0.0774194	0.0225806	0.0016129	2006	both	National	China	East and South East Asia
CHN	CHN_2006_CHNS	1	75	354	22.4907	0.239662	0.135593	0.0423729	0.00282486	2006	both	National	China	East and South East Asia
CHN	CHN_2006_CHNS	2	25	388	21.287	0.166865	0.126289	0.0128866	0.00257732	2006	both	National	China	East and South East Asia
CHN	CHN_2006_CHNS	2	35	886	22.6276	0.116544	0.0609481	0.023702	0.00225734	2006	both	National	China	East and South East Asia
CHN	CHN_2006_CHNS	2	45	1115	23.6468	0.123307	0.0286996	0.044843	0.00358744	2006	both	National	China	East and South East Asia
CHN	CHN_2006_CHNS	2	55	1128	23.8427	0.123075	0.0328014	0.0381206	0.00177305	2006	both	National	China	East and South East Asia
CHN	CHN_2006_CHNS	2	65	678	23.7581	0.194752	0.0693215	0.0501475	0.00884956	2006	both	National	China	East and South East Asia
CHN	CHN_2006_CHNS	2	75	413	23.2442	0.240254	0.104116	0.0774818	0.00726392	2006	both	National	China	East and South East Asia
CHN	CHN_2008_CHARLS	1	47.5	133	22.7219	0.434306	0.068991	0.00434979	0	2008	both	Subnational	China	East and South East Asia
CHN	CHN_2008_CHARLS	1	55	363	22.8009	0.185286	0.0424162	0.0116793	0.000777428	2008	both	Subnational	China	East and South East Asia
CHN	CHN_2008_CHARLS	1	65	258	22.4873	0.238018	0.0538465	0.0127467	0	2008	both	Subnational	China	East and South East Asia
CHN	CHN_2008_CHARLS	1	75	146	21.3372	0.299377	0.0961062	0.00998632	0	2008	both	Subnational	China	East and South East Asia
CHN	CHN_2008_CHARLS	2	47.5	173	23.8448	0.382674	0.0762785	0.0164966	0.00526486	2008	both	Subnational	China	East and South East Asia
CHN	CHN_2008_CHARLS	2	55	381	23.7517	0.196676	0.0363981	0.0420701	0.00241001	2008	both	Subnational	China	East and South East Asia
CHN	CHN_2008_CHARLS	2	65	237	23.8195	0.254586	0.0487701	0.0322149	0	2008	both	Subnational	China	East and South East Asia
CHN	CHN_2008_CHARLS	2	75	129	22.7025	0.370729	0.153193	0.0662932	0	2008	both	Subnational	China	East and South East Asia
CHN	CHN_2009_CHNS	1	25	420	22.1149	0.17876	0.12381	0.0238095	0.0047619	2009	both	National	China	East and South East Asia
CHN	CHN_2009_CHNS	1	35	717	23.6095	0.154864	0.0543933	0.0474198	0.0027894	2009	both	National	China	East and South East Asia
CHN	CHN_2009_CHNS	1	45	1001	24.0086	0.136437	0.028971	0.047952	0.002997	2009	both	National	China	East and South East Asia
CHN	CHN_2009_CHNS	1	55	1081	23.5111	0.122054	0.0407031	0.0351526	0	2009	both	National	China	East and South East Asia
CHN	CHN_2009_CHNS	1	65	725	23.2833	0.141073	0.0565517	0.0331034	0.00275862	2009	both	National	China	East and South East Asia
CHN	CHN_2009_CHNS	1	75	389	22.7449	0.220997	0.120823	0.0437018	0.00514139	2009	both	National	China	East and South East Asia
CHN	CHN_2009_CHNS	2	25	423	21.0604	0.142122	0.189125	0.0070922	0	2009	both	National	China	East and South East Asia
CHN	CHN_2009_CHNS	2	35	772	22.719	0.13888	0.0738342	0.0375648	0.00129534	2009	both	National	China	East and South East Asia
CHN	CHN_2009_CHNS	2	45	1129	23.8156	0.115007	0.0265722	0.0460585	0.00177148	2009	both	National	China	East and South East Asia
CHN	CHN_2009_CHNS	2	55	1188	23.9969	0.115614	0.0395623	0.0446128	0.003367	2009	both	National	China	East and South East Asia
CHN	CHN_2009_CHNS	2	65	775	23.9096	0.156791	0.0670968	0.0593548	0.00645161	2009	both	National	China	East and South East Asia
CHN	CHN_2009_CHNS	2	75	465	23.3223	0.213046	0.101075	0.0688172	0.00430108	2009	both	National	China	East and South East Asia
CHN	CHN_2009_SAGE	1	55	2491	23.8367	0.123148	0.0250863	0.0402527	0.00864168	2009	both	National	China	East and South East Asia
CHN	CHN_2009_SAGE	1	65	1749	23.8541	0.121322	0.0428402	0.0404391	0.0107952	2009	both	National	China	East and South East Asia
CHN	CHN_2009_SAGE	1	75	1217	23.4713	0.215633	0.0763353	0.0301801	0.0092882	2009	both	National	China	East and South East Asia
CHN	CHN_2009_SAGE	2	55	2951	24.7236	0.133654	0.0276851	0.0845934	0.0136123	2009	both	National	China	East and South East Asia
CHN	CHN_2009_SAGE	2	65	1965	24.4166	0.161898	0.0436684	0.0779489	0.0101802	2009	both	National	China	East and South East Asia
CHN	CHN_2009_SAGE	2	75	1354	24.0951	0.174587	0.0675865	0.0795324	0.00999146	2009	both	National	China	East and South East Asia
CHN	CHN_2011_CHARLS	1	47.5	1082	24.1614	0.246551	0.032719	0.0552707	0.0139677	2011	both	National	China	East and South East Asia
CHN	CHN_2011_CHARLS	1	55	2229	23.2892	0.104827	0.036435	0.0310678	0.0026301	2011	both	National	China	East and South East Asia
CHN	CHN_2011_CHARLS	1	65	1926	23.1886	0.185389	0.070297	0.0308919	0.00486714	2011	both	National	China	East and South East Asia
CHN	CHN_2011_CHARLS	1	75	914	22.3341	0.218303	0.135835	0.0212141	0.00557925	2011	both	National	China	East and South East Asia
CHN	CHN_2011_CHARLS	2	47.5	1490	25.01	0.538662	0.0351072	0.0872519	0.0288609	2011	both	National	China	East and South East Asia
CHN	CHN_2011_CHARLS	2	55	2467	24.9804	0.76785	0.0457845	0.080288	0.0298967	2011	both	National	China	East and South East Asia
CHN	CHN_2011_CHARLS	2	65	1941	24.3692	0.355863	0.0677726	0.112987	0.00659671	2011	both	National	China	East and South East Asia
CHN	CHN_2011_CHARLS	2	75	865	23.2939	0.231208	0.125853	0.0590403	0.0140452	2011	both	National	China	East and South East Asia
CHN	CHN_2011_CHNS	1	25	511	23.2537	0.19649	0.0861057	0.0645793	0.00978474	2011	both	National	China	East and South East Asia
CHN	CHN_2011_CHNS	1	35	792	24.27	0.143931	0.0315657	0.0505051	0.010101	2011	both	National	China	East and South East Asia
CHN	CHN_2011_CHNS	1	45	1376	24.504	0.1375	0.0210756	0.0581395	0.00944767	2011	both	National	China	East and South East Asia
CHN	CHN_2011_CHNS	1	55	1407	24.168	0.12551	0.018479	0.0490405	0.00995025	2011	both	National	China	East and South East Asia
CHN	CHN_2011_CHNS	1	65	1080	23.8613	0.130032	0.0398148	0.0425926	0.00833333	2011	both	National	China	East and South East Asia
CHN	CHN_2011_CHNS	1	75	513	23.1673	0.193694	0.0935673	0.0331384	0.00584795	2011	both	National	China	East and South East Asia
CHN	CHN_2011_CHNS	2	25	578	21.7857	0.181748	0.16263	0.0346021	0.0103806	2011	both	National	China	East and South East Asia
CHN	CHN_2011_CHNS	2	35	980	23.0695	0.138582	0.0469388	0.0438776	0.0132653	2011	both	National	China	East and South East Asia
CHN	CHN_2011_CHNS	2	45	1528	24.1646	0.118616	0.0287958	0.0615183	0.0104712	2011	both	National	China	East and South East Asia
CHN	CHN_2011_CHNS	2	55	1584	24.6814	0.135138	0.0290404	0.0732323	0.0132576	2011	both	National	China	East and South East Asia
CHN	CHN_2011_CHNS	2	65	1149	24.4547	0.13127	0.0443864	0.0609225	0.0121845	2011	both	National	China	East and South East Asia
CHN	CHN_2011_CHNS	2	75	591	23.5325	0.198416	0.0795262	0.0659898	0.00676819	2011	both	National	China	East and South East Asia
CHN	CHN_2012_CHARLS	1	47.5	30	23.1118	0.628274	0.0333333	0.0333333	0	2012	both	Subnational	China	East and South East Asia
CHN	CHN_2012_CHARLS	1	55	300	23.1947	0.200189	0.04	0.0266667	0.00666667	2012	both	Subnational	China	East and South East Asia
CHN	CHN_2012_CHARLS	1	65	303	23.0605	0.222198	0.0462046	0.029703	0.00330033	2012	both	Subnational	China	East and South East Asia
CHN	CHN_2012_CHARLS	1	75	178	21.7865	0.25751	0.117978	0.0224719	0.00561798	2012	both	Subnational	China	East and South East Asia
CHN	CHN_2012_CHARLS	2	47.5	117	24.3664	0.286063	0	0.0512821	0	2012	both	Subnational	China	East and South East Asia
CHN	CHN_2012_CHARLS	2	55	324	24.026	0.2206	0.0401235	0.0648148	0.00308642	2012	both	Subnational	China	East and South East Asia
CHN	CHN_2012_CHARLS	2	65	316	23.7453	0.210454	0.0696203	0.0537975	0.00632911	2012	both	Subnational	China	East and South East Asia
CHN	CHN_2012_CHARLS	2	75	137	22.9114	0.344442	0.131387	0.0364964	0	2012	both	Subnational	China	East and South East Asia
CHN	CHN_2015_CHARLS	1	47.5	920	24.1106	0.160629	0.0284969	0.0466824	0.00284401	2015	both	National	China	East and South East Asia
CHN	CHN_2015_CHARLS	1	55	2251	24.2031	0.14849	0.0299248	0.0535572	0.0108825	2015	both	National	China	East and South East Asia
CHN	CHN_2015_CHARLS	1	65	2425	23.5385	0.109534	0.0524527	0.0314514	0.00479054	2015	both	National	China	East and South East Asia
CHN	CHN_2015_CHARLS	1	75	1165	22.9834	0.203545	0.101482	0.0290424	0.00405745	2015	both	National	China	East and South East Asia
CHN	CHN_2015_CHARLS	2	47.5	1161	24.9467	0.19182	0.0218159	0.0828658	0.00481095	2015	both	National	China	East and South East Asia
CHN	CHN_2015_CHARLS	2	55	2659	24.4814	0.0966411	0.0349665	0.0673269	0.00750375	2015	both	National	China	East and South East Asia
CHN	CHN_2015_CHARLS	2	65	2515	24.2604	0.101958	0.0519136	0.0681089	0.00874841	2015	both	National	China	East and South East Asia
CHN	CHN_2015_CHARLS	2	75	1073	23.7819	0.162986	0.0854163	0.0447238	0.00891896	2015	both	National	China	East and South East Asia
CHN	CHN_2015_CHNS	1	25	475	24.5666	0.341424	0.0610526	0.126316	0.0715789	2015	both	National	China	East and South East Asia
CHN	CHN_2015_CHNS	1	35	524	24.8695	0.238956	0.0400763	0.0820611	0.028626	2015	both	National	China	East and South East Asia
CHN	CHN_2015_CHNS	1	45	932	24.7071	0.139731	0.0257511	0.0600858	0.00751073	2015	both	National	China	East and South East Asia
CHN	CHN_2015_CHNS	1	55	1136	24.5709	0.12211	0.0228873	0.0607394	0.00792254	2015	both	National	China	East and South East Asia
CHN	CHN_2015_CHNS	1	65	1062	24.019	0.129455	0.0423729	0.0357815	0	2015	both	National	China	East and South East Asia
CHN	CHN_2015_CHNS	1	75	484	23.5066	0.181767	0.0743802	0.0392562	0.00619835	2015	both	National	China	East and South East Asia
CHN	CHN_2015_CHNS	2	25	349	22.2618	0.261415	0.148997	0.0573066	0.0315186	2015	both	National	China	East and South East Asia
CHN	CHN_2015_CHNS	2	35	602	23.2662	0.171449	0.0780731	0.0581395	0.0116279	2015	both	National	China	East and South East Asia
CHN	CHN_2015_CHNS	2	45	1040	24.4166	0.131736	0.0278846	0.0682692	0.0125	2015	both	National	China	East and South East Asia
CHN	CHN_2015_CHNS	2	55	1238	24.7623	0.124021	0.0185784	0.0799677	0.00565428	2015	both	National	China	East and South East Asia
CHN	CHN_2015_CHNS	2	65	1215	24.7048	0.120749	0.0378601	0.0691358	0.00658436	2015	both	National	China	East and South East Asia
CHN	CHN_2015_CHNS	2	75	557	24.2439	0.170759	0.0502693	0.064632	0.00897666	2015	both	National	China	East and South East Asia
CIV	CIV_1994_DHS	2	25	1552	22.0274	0.0982388	0.0781439	0.0244082	0.00778871	1994	both	National	Cote d'Ivoire	Sub-Saharan Africa
CIV	CIV_1994_DHS	2	35	933	22.342	0.149214	0.0922117	0.0431543	0.0117337	1994	both	National	Cote d'Ivoire	Sub-Saharan Africa
CIV	CIV_1994_DHS	2	45	197	22.5967	0.29406	0.0820516	0.0441918	0.00289145	1994	both	National	Cote d'Ivoire	Sub-Saharan Africa
CIV	CIV_1999_DHS	2	25	993	22.39	0.134815	0.0625902	0.0297939	0.00618245	1999	both	National	Cote d'Ivoire	Sub-Saharan Africa
CIV	CIV_1999_DHS	2	35	643	23.14	0.245072	0.082437	0.0804678	0.028556	1999	both	National	Cote d'Ivoire	Sub-Saharan Africa
CIV	CIV_1999_DHS	2	45	369	23.7447	0.316456	0.0922777	0.114004	0.0315333	1999	both	National	Cote d'Ivoire	Sub-Saharan Africa
CIV	CIV_2005_STEPS_rural	1	25	233	22.6923	0.345526	0.0901288	0.0429185	0.0128755	2005	rural	Subnational	Cote d'Ivoire	Sub-Saharan Africa
CIV	CIV_2005_STEPS_rural	1	35	231	22.844	0.247905	0.0735931	0.04329	0.00865801	2005	rural	Subnational	Cote d'Ivoire	Sub-Saharan Africa
CIV	CIV_2005_STEPS_rural	1	45	165	23.5821	0.285552	0.0424242	0.0363636	0.0121212	2005	rural	Subnational	Cote d'Ivoire	Sub-Saharan Africa
CIV	CIV_2005_STEPS_rural	1	55	109	23.9175	0.510073	0.0550459	0.0917431	0.0275229	2005	rural	Subnational	Cote d'Ivoire	Sub-Saharan Africa
CIV	CIV_2005_STEPS_rural	1	62.5	68	23.4747	0.428002	0.0588235	0.0294118	0	2005	rural	Subnational	Cote d'Ivoire	Sub-Saharan Africa
CIV	CIV_2005_STEPS_rural	2	25	342	23.18	0.226743	0.108187	0.0672515	0.0116959	2005	rural	Subnational	Cote d'Ivoire	Sub-Saharan Africa
CIV	CIV_2005_STEPS_rural	2	35	243	24.5761	0.376911	0.0699588	0.127572	0.037037	2005	rural	Subnational	Cote d'Ivoire	Sub-Saharan Africa
CIV	CIV_2005_STEPS_rural	2	45	166	24.5075	0.508209	0.0783133	0.150602	0.0421687	2005	rural	Subnational	Cote d'Ivoire	Sub-Saharan Africa
CIV	CIV_2005_STEPS_rural	2	55	116	24.6227	0.477273	0.103448	0.103448	0.0431034	2005	rural	Subnational	Cote d'Ivoire	Sub-Saharan Africa
CIV	CIV_2005_STEPS_rural	2	62.5	47	24.0792	0.798196	0.148936	0.170213	0.0425532	2005	rural	Subnational	Cote d'Ivoire	Sub-Saharan Africa
CIV	CIV_2005_STEPS_urban	1	25	361	22.5393	0.282146	0.0969529	0.0387812	0.0221607	2005	urban	Subnational	Cote d'Ivoire	Sub-Saharan Africa
CIV	CIV_2005_STEPS_urban	1	35	273	23.7092	0.259182	0.0549451	0.0622711	0.014652	2005	urban	Subnational	Cote d'Ivoire	Sub-Saharan Africa
CIV	CIV_2005_STEPS_urban	1	45	159	24.282	0.300495	0.0377358	0.0754717	0.00628931	2005	urban	Subnational	Cote d'Ivoire	Sub-Saharan Africa
CIV	CIV_2005_STEPS_urban	1	55	98	24.3101	0.472173	0.0918367	0.132653	0.0306122	2005	urban	Subnational	Cote d'Ivoire	Sub-Saharan Africa
CIV	CIV_2005_STEPS_urban	1	62.5	28	23.6584	0.691807	0.0357143	0.0714286	0	2005	urban	Subnational	Cote d'Ivoire	Sub-Saharan Africa
CIV	CIV_2005_STEPS_urban	2	25	564	24.0551	0.226862	0.072695	0.0762411	0.0301418	2005	urban	Subnational	Cote d'Ivoire	Sub-Saharan Africa
CIV	CIV_2005_STEPS_urban	2	35	295	25.6264	0.302802	0.0508475	0.159322	0.040678	2005	urban	Subnational	Cote d'Ivoire	Sub-Saharan Africa
CIV	CIV_2005_STEPS_urban	2	45	174	27.4515	0.466833	0.0114943	0.281609	0.103448	2005	urban	Subnational	Cote d'Ivoire	Sub-Saharan Africa
CIV	CIV_2005_STEPS_urban	2	55	100	26.4607	0.680788	0.03	0.18	0.09	2005	urban	Subnational	Cote d'Ivoire	Sub-Saharan Africa
CIV	CIV_2005_STEPS_urban	2	62.5	39	24.6493	0.692026	0.025641	0.153846	0	2005	urban	Subnational	Cote d'Ivoire	Sub-Saharan Africa
CIV	CIV_2012_DHS	2	25	1700	22.8712	0.111757	0.0580416	0.0437698	0.009675	2012	both	National	Cote d'Ivoire	Sub-Saharan Africa
CIV	CIV_2012_DHS	2	35	1156	24.2021	0.18946	0.0548616	0.106355	0.0261696	2012	both	National	Cote d'Ivoire	Sub-Saharan Africa
CIV	CIV_2012_DHS	2	45	787	24.4169	0.269979	0.046734	0.11476	0.0349865	2012	both	National	Cote d'Ivoire	Sub-Saharan Africa
CMR	CMR_1998_DHS	2	25	859	22.5529	0.159665	0.0778348	0.0302946	0.00855264	1998	both	National	Cameroon	Sub-Saharan Africa
CMR	CMR_1998_DHS	2	35	475	23.4406	0.25414	0.0600515	0.0566617	0.0252556	1998	both	National	Cameroon	Sub-Saharan Africa
CMR	CMR_1998_DHS	2	45	95	22.9564	0.317338	0.0740418	0.024504	0.00840468	1998	both	National	Cameroon	Sub-Saharan Africa
CMR	CMR_2003_STEPS	1	25	1108	23.0733	0.100946	0.0388087	0.0207581	0.00451264	2003	urban	Subnational	Cameroon	Sub-Saharan Africa
CMR	CMR_2003_STEPS	1	35	614	24.5914	0.177621	0.0260586	0.110749	0.0162866	2003	urban	Subnational	Cameroon	Sub-Saharan Africa
CMR	CMR_2003_STEPS	1	45	525	25.2897	0.188769	0.0266667	0.133333	0.0266667	2003	urban	Subnational	Cameroon	Sub-Saharan Africa
CMR	CMR_2003_STEPS	1	55	443	25.4573	0.21748	0.0406321	0.162528	0.0248307	2003	urban	Subnational	Cameroon	Sub-Saharan Africa
CMR	CMR_2003_STEPS	1	65	239	24.5849	0.30044	0.0669456	0.125523	0.0167364	2003	urban	Subnational	Cameroon	Sub-Saharan Africa
CMR	CMR_2003_STEPS	1	75	90	23.8683	0.546468	0.1	0.122222	0.0333333	2003	urban	Subnational	Cameroon	Sub-Saharan Africa
CMR	CMR_2003_STEPS	2	25	1668	24.9797	0.124144	0.0479616	0.131295	0.0413669	2003	urban	Subnational	Cameroon	Sub-Saharan Africa
CMR	CMR_2003_STEPS	2	35	1195	26.9328	0.166232	0.0259414	0.274477	0.0853556	2003	urban	Subnational	Cameroon	Sub-Saharan Africa
CMR	CMR_2003_STEPS	2	45	864	28.7279	0.211548	0.025463	0.398148	0.155093	2003	urban	Subnational	Cameroon	Sub-Saharan Africa
CMR	CMR_2003_STEPS	2	55	456	28.7227	0.306815	0.0438596	0.379386	0.173246	2003	urban	Subnational	Cameroon	Sub-Saharan Africa
CMR	CMR_2003_STEPS	2	65	219	25.7481	0.444156	0.118721	0.219178	0.109589	2003	urban	Subnational	Cameroon	Sub-Saharan Africa
CMR	CMR_2003_STEPS	2	75	134	24.2618	0.451189	0.0970149	0.149254	0.0447761	2003	urban	Subnational	Cameroon	Sub-Saharan Africa
CMR	CMR_2004_DHS	2	25	1650	23.3032	0.110731	0.0593973	0.0516819	0.00945901	2004	both	National	Cameroon	Sub-Saharan Africa
CMR	CMR_2004_DHS	2	35	1069	24.6267	0.172828	0.0453299	0.137403	0.0430524	2004	both	National	Cameroon	Sub-Saharan Africa
CMR	CMR_2004_DHS	2	45	748	25.0436	0.203326	0.0555853	0.176358	0.0484779	2004	both	National	Cameroon	Sub-Saharan Africa
CMR	CMR_2011_DHS	2	25	2652	23.4989	0.103909	0.0679849	0.073726	0.0217094	2011	both	National	Cameroon	Sub-Saharan Africa
CMR	CMR_2011_DHS	2	35	1702	25.2695	0.164451	0.0518837	0.168831	0.0485434	2011	both	National	Cameroon	Sub-Saharan Africa
CMR	CMR_2011_DHS	2	45	1248	25.8239	0.193662	0.0526299	0.21914	0.0828446	2011	both	National	Cameroon	Sub-Saharan Africa
CMR	CMR_2019_DHS	2	25	2147	24.0541	0.129198	0.0529551	0.0956265	0.024834	2019	both	National	Cameroon	Sub-Saharan Africa
CMR	CMR_2019_DHS	2	35	1568	26.0448	0.18466	0.0447517	0.21643	0.0849376	2019	both	National	Cameroon	Sub-Saharan Africa
CMR	CMR_2019_DHS	2	45	982	26.3764	0.215553	0.041545	0.249313	0.0793269	2019	both	National	Cameroon	Sub-Saharan Africa
COD	COD_2005_STEPS	1	25	212	19.8752	0.167993	0.264151	0.00471698	0	2005	urban	Subnational	DR Congo	Sub-Saharan Africa
COD	COD_2005_STEPS	1	35	140	21.0749	0.367231	0.235714	0.0428571	0.0142857	2005	urban	Subnational	DR Congo	Sub-Saharan Africa
COD	COD_2005_STEPS	1	45	108	21.9623	0.356488	0.138889	0.0462963	0	2005	urban	Subnational	DR Congo	Sub-Saharan Africa
COD	COD_2005_STEPS	1	55	74	22.2909	0.508839	0.175676	0.0675676	0	2005	urban	Subnational	DR Congo	Sub-Saharan Africa
COD	COD_2005_STEPS	1	65	55	20.956	0.565167	0.309091	0	0	2005	urban	Subnational	DR Congo	Sub-Saharan Africa
COD	COD_2005_STEPS	1	75	18	22.4783	1.46579	0.333333	0.166667	0.0555556	2005	urban	Subnational	DR Congo	Sub-Saharan Africa
COD	COD_2005_STEPS	2	25	338	21.5454	0.195848	0.183432	0.0295858	0.00295858	2005	urban	Subnational	DR Congo	Sub-Saharan Africa
COD	COD_2005_STEPS	2	35	288	23.4561	0.362165	0.170139	0.111111	0.0381944	2005	urban	Subnational	DR Congo	Sub-Saharan Africa
COD	COD_2005_STEPS	2	45	146	24.1685	0.409834	0.116438	0.143836	0.0205479	2005	urban	Subnational	DR Congo	Sub-Saharan Africa
COD	COD_2005_STEPS	2	55	88	24.1167	0.646552	0.170455	0.136364	0.0568182	2005	urban	Subnational	DR Congo	Sub-Saharan Africa
COD	COD_2005_STEPS	2	65	60	23.6029	0.731642	0.183333	0.133333	0.05	2005	urban	Subnational	DR Congo	Sub-Saharan Africa
COD	COD_2005_STEPS	2	75	24	23.3515	0.87501	0.0416667	0.0416667	0.0416667	2005	urban	Subnational	DR Congo	Sub-Saharan Africa
COD	COD_2007_DHS	2	25	1545	21.1374	0.0965626	0.171222	0.0120588	0.00212433	2007	both	National	DR Congo	Sub-Saharan Africa
COD	COD_2007_DHS	2	35	1003	21.9339	0.181085	0.150763	0.0307741	0.0129514	2007	both	National	DR Congo	Sub-Saharan Africa
COD	COD_2007_DHS	2	45	730	21.7312	0.271455	0.16727	0.0500963	0.0120821	2007	both	National	DR Congo	Sub-Saharan Africa
COD	COD_2014_DHS	2	25	2896	21.7524	0.0952273	0.133628	0.0212109	0.00363031	2014	both	National	DR Congo	Sub-Saharan Africa
COD	COD_2014_DHS	2	35	2043	22.5573	0.19675	0.121339	0.0554268	0.0200831	2014	both	National	DR Congo	Sub-Saharan Africa
COD	COD_2014_DHS	2	45	1433	22.729	0.158113	0.104723	0.0536095	0.0173193	2014	both	National	DR Congo	Sub-Saharan Africa
COG	COG_2004_STEPS	1	27.5	276	21.3879	0.17565	0.134058	0.0144928	0	2004	urban	Community	Congo	Sub-Saharan Africa
COG	COG_2004_STEPS	1	35	370	21.7709	0.172584	0.151351	0.0189189	0.0027027	2004	urban	Community	Congo	Sub-Saharan Africa
COG	COG_2004_STEPS	1	45	206	22.4545	0.273362	0.101942	0.0291262	0.00485437	2004	urban	Community	Congo	Sub-Saharan Africa
COG	COG_2004_STEPS	1	55	104	22.6605	0.382278	0.115385	0.0384615	0.0192308	2004	urban	Community	Congo	Sub-Saharan Africa
COG	COG_2004_STEPS	1	62.5	57	22.3719	0.532222	0.175439	0.0701754	0	2004	urban	Community	Congo	Sub-Saharan Africa
COG	COG_2004_STEPS	2	27.5	277	22.9026	0.260103	0.155235	0.0649819	0.0144404	2004	urban	Community	Congo	Sub-Saharan Africa
COG	COG_2004_STEPS	2	35	338	24.2178	0.280874	0.106509	0.130178	0.0473373	2004	urban	Community	Congo	Sub-Saharan Africa
COG	COG_2004_STEPS	2	45	185	26.2481	0.441903	0.0648649	0.254054	0.0810811	2004	urban	Community	Congo	Sub-Saharan Africa
COG	COG_2004_STEPS	2	55	110	26.3431	0.608874	0.0727273	0.236364	0.0909091	2004	urban	Community	Congo	Sub-Saharan Africa
COG	COG_2004_STEPS	2	62.5	46	23.3728	0.745958	0.130435	0.152174	0.0217391	2004	urban	Community	Congo	Sub-Saharan Africa
COG	COG_2005_DHS	2	25	2372	22.4028	0.156763	0.120673	0.0501833	0.00655243	2005	both	National	Congo	Sub-Saharan Africa
COG	COG_2005_DHS	2	35	1577	23.9353	0.220298	0.109615	0.10612	0.031514	2005	both	National	Congo	Sub-Saharan Africa
COG	COG_2005_DHS	2	45	929	24.9138	0.242593	0.0735179	0.168794	0.0481483	2005	both	National	Congo	Sub-Saharan Africa
COG	COG_2012_DHS	2	25	1711	22.5386	0.170034	0.118137	0.0585908	0.0168461	2012	both	National	Congo	Sub-Saharan Africa
COG	COG_2012_DHS	2	35	1369	24.4534	0.231892	0.101431	0.147494	0.049157	2012	both	National	Congo	Sub-Saharan Africa
COG	COG_2012_DHS	2	45	949	24.2296	0.294096	0.1161	0.159173	0.0248958	2012	both	National	Congo	Sub-Saharan Africa
COK	COK_2003_STEPS	1	27.5	80	33.1621	1.25583	0	0.537342	0.303798	2003	both	National	Cook Islands	Oceania
COK	COK_2003_STEPS	1	35	254	33.1202	0.368326	0	0.584744	0.305557	2003	both	National	Cook Islands	Oceania
COK	COK_2003_STEPS	1	45	243	32.5692	0.30806	0	0.628584	0.338801	2003	both	National	Cook Islands	Oceania
COK	COK_2003_STEPS	1	55	251	31.6459	0.418642	0.0129429	0.553878	0.273965	2003	both	National	Cook Islands	Oceania
COK	COK_2003_STEPS	1	62.5	97	30.4692	0.290444	0	0.488418	0.180156	2003	both	National	Cook Islands	Oceania
COK	COK_2003_STEPS	2	27.5	107	31.0532	0.570063	0	0.552462	0.292716	2003	both	National	Cook Islands	Oceania
COK	COK_2003_STEPS	2	35	259	34.1002	0.859642	0	0.663791	0.419692	2003	both	National	Cook Islands	Oceania
COK	COK_2003_STEPS	2	45	242	33.7257	0.483113	0.0076078	0.712248	0.40779	2003	both	National	Cook Islands	Oceania
COK	COK_2003_STEPS	2	55	236	33.3406	0.596952	0.00432515	0.684768	0.396207	2003	both	National	Cook Islands	Oceania
COK	COK_2003_STEPS	2	62.5	114	34.0527	0.662353	0	0.678941	0.380722	2003	both	National	Cook Islands	Oceania
COK	COK_2014_STEPS	1	25	66	33.0211	1.07476	0	0.645714	0.314286	2014	both	National	Cook Islands	Oceania
COK	COK_2014_STEPS	1	35	92	33.6408	0.822797	0	0.713004	0.376682	2014	both	National	Cook Islands	Oceania
COK	COK_2014_STEPS	1	45	114	35.7036	0.925606	0	0.7516	0.508619	2014	both	National	Cook Islands	Oceania
COK	COK_2014_STEPS	1	55	131	34.0901	0.769046	0.00854701	0.689459	0.37037	2014	both	National	Cook Islands	Oceania
COK	COK_2014_STEPS	1	62.5	43	32.2622	0.935264	0	0.644187	0.274765	2014	both	National	Cook Islands	Oceania
COK	COK_2014_STEPS	2	25	93	34.4679	0.949579	0	0.707904	0.439863	2014	both	National	Cook Islands	Oceania
COK	COK_2014_STEPS	2	35	103	37.0906	1.45138	0	0.758491	0.486792	2014	both	National	Cook Islands	Oceania
COK	COK_2014_STEPS	2	45	120	35.8896	0.878698	0	0.765203	0.499078	2014	both	National	Cook Islands	Oceania
COK	COK_2014_STEPS	2	55	90	36.1797	0.764471	0	0.804167	0.591667	2014	both	National	Cook Islands	Oceania
COK	COK_2014_STEPS	2	62.5	40	31.0324	0.815733	0	0.542857	0.142857	2014	both	National	Cook Islands	Oceania
COL	COL_1986_INTERSALT	1	25	24	21.2263	0.570456	0.125	0.0416667	0	1986	rural	Community	Colombia	Latin America and Caribbean
COL	COL_1986_INTERSALT	1	35	24	22.4079	0.452572	0.125	0	0	1986	rural	Community	Colombia	Latin America and Caribbean
COL	COL_1986_INTERSALT	1	45	24	22.388	0.611864	0.0833333	0	0	1986	rural	Community	Colombia	Latin America and Caribbean
COL	COL_1986_INTERSALT	1	55	24	22.3735	0.626737	0.166667	0	0	1986	rural	Community	Colombia	Latin America and Caribbean
COL	COL_1986_INTERSALT	2	25	25	20.9388	0.433767	0.08	0	0	1986	rural	Community	Colombia	Latin America and Caribbean
COL	COL_1986_INTERSALT	2	35	25	24.1306	0.737101	0.08	0.04	0	1986	rural	Community	Colombia	Latin America and Caribbean
COL	COL_1986_INTERSALT	2	45	21	25.5403	0.873995	0	0.142857	0	1986	rural	Community	Colombia	Latin America and Caribbean
COL	COL_1986_INTERSALT	2	55	24	25.2524	0.835029	0	0.125	0	1986	rural	Community	Colombia	Latin America and Caribbean
COL	COL_1995_DHS	2	25	1774	23.8421	0.0956366	0.046344	0.0601885	0.00854104	1995	both	National	Colombia	Latin America and Caribbean
COL	COL_1995_DHS	2	35	1057	25.4888	0.134428	0.0161981	0.140625	0.0245701	1995	both	National	Colombia	Latin America and Caribbean
COL	COL_1995_DHS	2	45	237	26.4089	0.305037	0.0219842	0.183163	0.033962	1995	both	National	Colombia	Latin America and Caribbean
COL	COL_2000_DHS	2	25	1653	24.2219	0.0978863	0.0345198	0.0837464	0.00927792	2000	both	National	Colombia	Latin America and Caribbean
COL	COL_2000_DHS	2	35	1069	25.6106	0.12921	0.0230118	0.14423	0.0193083	2000	both	National	Colombia	Latin America and Caribbean
COL	COL_2000_DHS	2	45	207	26.4575	0.26903	0.008194	0.177253	0.0178617	2000	both	National	Colombia	Latin America and Caribbean
COL	COL_2005_DHS	1	25	7386	23.2461	0.0571686	0.0486742	0.0493024	0.00841326	2005	both	National	Colombia	Latin America and Caribbean
COL	COL_2005_DHS	1	35	5803	24.9916	0.0726092	0.0220178	0.09894	0.0142288	2005	both	National	Colombia	Latin America and Caribbean
COL	COL_2005_DHS	1	45	5098	25.4675	0.0749666	0.0158531	0.119521	0.0192597	2005	both	National	Colombia	Latin America and Caribbean
COL	COL_2005_DHS	1	55	3641	25.5316	0.0919366	0.0294987	0.131998	0.0181039	2005	both	National	Colombia	Latin America and Caribbean
COL	COL_2005_DHS	1	62.5	1354	25.4203	0.13833	0.0282541	0.117883	0.0241863	2005	both	National	Colombia	Latin America and Caribbean
COL	COL_2005_DHS	2	25	10849	23.6116	0.0514286	0.062389	0.0693926	0.0154718	2005	both	National	Colombia	Latin America and Caribbean
COL	COL_2005_DHS	2	35	9535	25.6922	0.0631211	0.0255317	0.155767	0.0356241	2005	both	National	Colombia	Latin America and Caribbean
COL	COL_2005_DHS	2	45	8251	26.9407	0.0730984	0.016438	0.227658	0.0591586	2005	both	National	Colombia	Latin America and Caribbean
COL	COL_2005_DHS	2	55	5686	27.7924	0.0887413	0.0185278	0.295382	0.0857399	2005	both	National	Colombia	Latin America and Caribbean
COL	COL_2005_DHS	2	62.5	1936	27.5484	0.159267	0.0329967	0.277647	0.0769784	2005	both	National	Colombia	Latin America and Caribbean
COL	COL_2010_DHS	1	25	11061	23.8174	0.0515451	0.0352844	0.0730315	0.0113486	2010	both	National	Colombia	Latin America and Caribbean
COL	COL_2010_DHS	1	35	9035	25.6339	0.0556827	0.012667	0.133801	0.0216787	2010	both	National	Colombia	Latin America and Caribbean
COL	COL_2010_DHS	1	45	8425	26.0214	0.057037	0.0123692	0.148981	0.0238633	2010	both	National	Colombia	Latin America and Caribbean
COL	COL_2010_DHS	1	55	5982	25.9958	0.0712511	0.0154537	0.152224	0.0264916	2010	both	National	Colombia	Latin America and Caribbean
COL	COL_2010_DHS	1	62.5	2224	25.7843	0.105507	0.0190857	0.141157	0.0177583	2010	both	National	Colombia	Latin America and Caribbean
COL	COL_2010_DHS	2	25	13642	24.2067	0.04829	0.054211	0.0983045	0.022921	2010	both	National	Colombia	Latin America and Caribbean
COL	COL_2010_DHS	2	35	12120	26.2983	0.0550434	0.0171273	0.185895	0.049454	2010	both	National	Colombia	Latin America and Caribbean
COL	COL_2010_DHS	2	45	11436	27.4579	0.0614146	0.0137293	0.255497	0.071486	2010	both	National	Colombia	Latin America and Caribbean
COL	COL_2010_DHS	2	55	8324	28.1935	0.0684485	0.0126282	0.320483	0.0862465	2010	both	National	Colombia	Latin America and Caribbean
COL	COL_2010_DHS	2	62.5	2836	28.0863	0.120645	0.0171487	0.316041	0.0892335	2010	both	National	Colombia	Latin America and Caribbean
COM	COM_1996_DHS	2	25	376	22.2191	0.193137	0.0904255	0.0265957	0.00797872	1996	both	National	Comoros	Sub-Saharan Africa
COM	COM_1996_DHS	2	35	305	22.7159	0.243738	0.114754	0.0721311	0.0229508	1996	both	National	Comoros	Sub-Saharan Africa
COM	COM_1996_DHS	2	45	63	22.6199	0.430547	0.0634921	0	0	1996	both	National	Comoros	Sub-Saharan Africa
COM	COM_2011_STEPS	1	27.5	297	22.8209	0.188296	0.0517971	0.0230449	0	2011	both	National	Comoros	Sub-Saharan Africa
COM	COM_2011_STEPS	1	35	466	23.7639	0.208079	0.0404336	0.0658425	0.0175905	2011	both	National	Comoros	Sub-Saharan Africa
COM	COM_2011_STEPS	1	45	354	23.9767	0.246744	0.0480652	0.0817159	0.013676	2011	both	National	Comoros	Sub-Saharan Africa
COM	COM_2011_STEPS	1	55	288	23.3238	0.280782	0.0841503	0.0560736	0.0088281	2011	both	National	Comoros	Sub-Saharan Africa
COM	COM_2011_STEPS	1	62.5	136	23.3833	0.380109	0.095224	0.0358	0	2011	both	National	Comoros	Sub-Saharan Africa
COM	COM_2011_STEPS	2	27.5	697	25.4145	0.234997	0.0578993	0.16113	0.0445101	2011	both	National	Comoros	Sub-Saharan Africa
COM	COM_2011_STEPS	2	35	1073	26.5236	0.223618	0.0544181	0.237134	0.0774138	2011	both	National	Comoros	Sub-Saharan Africa
COM	COM_2011_STEPS	2	45	819	27.2484	0.277757	0.0364275	0.278085	0.111891	2011	both	National	Comoros	Sub-Saharan Africa
COM	COM_2011_STEPS	2	55	632	26.462	0.273776	0.0318399	0.258372	0.0887308	2011	both	National	Comoros	Sub-Saharan Africa
COM	COM_2011_STEPS	2	62.5	284	25.0001	0.350671	0.0842942	0.148661	0.045737	2011	both	National	Comoros	Sub-Saharan Africa
COM	COM_2012_DHS	2	25	1686	24.0548	0.138847	0.0633902	0.0968621	0.0235109	2012	both	National	Comoros	Sub-Saharan Africa
COM	COM_2012_DHS	2	35	1219	25.9311	0.18971	0.0305489	0.191369	0.0529772	2012	both	National	Comoros	Sub-Saharan Africa
COM	COM_2012_DHS	2	45	733	26.1453	0.30117	0.0488439	0.209698	0.0734069	2012	both	National	Comoros	Sub-Saharan Africa
CPV	CPV_2007_STEPS	1	27.5	119	22.8605	0.216244	0.0561051	0.052195	0.00997927	2007	both	National	Cabo Verde	Sub-Saharan Africa
CPV	CPV_2007_STEPS	1	35	199	24.0664	0.18774	0.0248881	0.0655758	0	2007	both	National	Cabo Verde	Sub-Saharan Africa
CPV	CPV_2007_STEPS	1	45	204	23.9348	0.529933	0.0683126	0.0848692	0.0208143	2007	both	National	Cabo Verde	Sub-Saharan Africa
CPV	CPV_2007_STEPS	1	55	104	23.8258	0.645803	0.0727439	0.0830265	0.00447945	2007	both	National	Cabo Verde	Sub-Saharan Africa
CPV	CPV_2007_STEPS	1	62.5	32	23.156	0.903931	0.131698	0.0691496	0.0371646	2007	both	National	Cabo Verde	Sub-Saharan Africa
CPV	CPV_2007_STEPS	2	27.5	123	24.0765	0.719126	0.0215816	0.101773	0	2007	both	National	Cabo Verde	Sub-Saharan Africa
CPV	CPV_2007_STEPS	2	35	305	24.409	0.372217	0.0584433	0.133402	0.0159003	2007	both	National	Cabo Verde	Sub-Saharan Africa
CPV	CPV_2007_STEPS	2	45	345	26.0495	0.373228	0.0286574	0.22079	0.0484524	2007	both	National	Cabo Verde	Sub-Saharan Africa
CPV	CPV_2007_STEPS	2	55	228	25.7579	0.579025	0.0265195	0.152743	0.0392714	2007	both	National	Cabo Verde	Sub-Saharan Africa
CPV	CPV_2007_STEPS	2	62.5	65	25.9829	0.590296	0.0193579	0.0854474	0.0406186	2007	both	National	Cabo Verde	Sub-Saharan Africa
CRI	CRI_2005_CRELES	1	65	356	26.5668	0.236899	0.0149287	0.196479	0.0270872	2005	both	National	Costa Rica	Latin America and Caribbean
CRI	CRI_2005_CRELES	1	75	430	25.7823	0.208616	0.0254174	0.151341	0.0158688	2005	both	National	Costa Rica	Latin America and Caribbean
CRI	CRI_2005_CRELES	2	65	437	28.4977	0.290239	0.0117963	0.338694	0.110298	2005	both	National	Costa Rica	Latin America and Caribbean
CRI	CRI_2005_CRELES	2	75	442	27.6082	0.263808	0.0399149	0.28437	0.0659682	2005	both	National	Costa Rica	Latin America and Caribbean
CRI	CRI_2007_CRELES	1	66	262	26.1749	0.265319	0.019084	0.175573	0.0305344	2007	both	National	Costa Rica	Latin America and Caribbean
CRI	CRI_2007_CRELES	1	75	376	25.6328	0.212722	0.0345745	0.135638	0.018617	2007	both	National	Costa Rica	Latin America and Caribbean
CRI	CRI_2007_CRELES	2	66	318	27.8478	0.290227	0.0251572	0.292453	0.106918	2007	both	National	Costa Rica	Latin America and Caribbean
CRI	CRI_2007_CRELES	2	75	397	27.2643	0.245702	0.0201511	0.241814	0.0528967	2007	both	National	Costa Rica	Latin America and Caribbean
CRI	CRI_2009_CRELES	1	67	148	26.6627	0.395299	0.0405405	0.209459	0.027027	2009	both	National	Costa Rica	Latin America and Caribbean
CRI	CRI_2009_CRELES	1	75	314	25.8493	0.22909	0.00955414	0.140127	0.0191083	2009	both	National	Costa Rica	Latin America and Caribbean
CRI	CRI_2009_CRELES	2	67	205	28.095	0.359321	0.0195122	0.317073	0.097561	2009	both	National	Costa Rica	Latin America and Caribbean
CRI	CRI_2009_CRELES	2	75	338	27.4503	0.273443	0.0177515	0.251479	0.0710059	2009	both	National	Costa Rica	Latin America and Caribbean
CRI	CRI_2011_CRELES	1	57	533	27.2797	0.248971	0.00711581	0.248116	0.0570467	2011	both	National	Costa Rica	Latin America and Caribbean
CRI	CRI_2011_CRELES	1	63.5	525	26.5593	0.226868	0.00923391	0.178926	0.0313726	2011	both	National	Costa Rica	Latin America and Caribbean
CRI	CRI_2011_CRELES	2	57	828	29.1915	0.253744	0.01001	0.392387	0.143292	2011	both	National	Costa Rica	Latin America and Caribbean
CRI	CRI_2011_CRELES	2	63.5	848	29.112	0.226172	0.0133136	0.391329	0.113506	2011	both	National	Costa Rica	Latin America and Caribbean
CRI	CRI_2013_CRELES	1	58	252	27.436	0.284938	0.00396825	0.230159	0.0436508	2013	both	National	Costa Rica	Latin America and Caribbean
CRI	CRI_2013_CRELES	1	64.5	615	26.7622	0.178362	0.0146341	0.204878	0.0373984	2013	both	National	Costa Rica	Latin America and Caribbean
CRI	CRI_2013_CRELES	2	58	460	29.5377	0.274586	0.00434783	0.419565	0.147826	2013	both	National	Costa Rica	Latin America and Caribbean
CRI	CRI_2013_CRELES	2	64.5	1010	29.1912	0.165842	0.00891089	0.4	0.119802	2013	both	National	Costa Rica	Latin America and Caribbean
CUB	CUB_2000_SABE	1	65	342	23.9108	0.236944	0.0887837	0.07789	0.00326949	2000	urban	Community	Cuba	Latin America and Caribbean
CUB	CUB_2000_SABE	1	75	180	22.5146	0.379564	0.214826	0.0533193	0	2000	urban	Community	Cuba	Latin America and Caribbean
CUB	CUB_2000_SABE	2	65	451	26.7968	0.288918	0.0837785	0.273531	0.0801336	2000	urban	Community	Cuba	Latin America and Caribbean
CUB	CUB_2000_SABE	2	75	369	24.9973	0.307421	0.0944957	0.147543	0.0318904	2000	urban	Community	Cuba	Latin America and Caribbean
CZE	CZE_1985_MONICA	1	27.5	143	24.936	0.371146	0.00699301	0.0979021	0.013986	1985	both	National	Czech Republic	Central and Eastern Europe
CZE	CZE_1985_MONICA	1	35	328	26.3229	0.142626	0.00304878	0.128049	0.0243902	1985	both	National	Czech Republic	Central and Eastern Europe
CZE	CZE_1985_MONICA	1	45	281	27.299	0.280648	0.00711744	0.19573	0.0320285	1985	both	National	Czech Republic	Central and Eastern Europe
CZE	CZE_1985_MONICA	1	55	352	28.1077	0.383788	0.00284091	0.295455	0.0539773	1985	both	National	Czech Republic	Central and Eastern Europe
CZE	CZE_1985_MONICA	1	62.5	139	27.8389	0.413572	0	0.223022	0.0935252	1985	both	National	Czech Republic	Central and Eastern Europe
CZE	CZE_1985_MONICA	2	27.5	143	23.7537	0.233823	0.048951	0.0909091	0.020979	1985	both	National	Czech Republic	Central and Eastern Europe
CZE	CZE_1985_MONICA	2	35	358	24.9426	0.389858	0.0139665	0.128492	0.0391061	1985	both	National	Czech Republic	Central and Eastern Europe
CZE	CZE_1985_MONICA	2	45	303	27.7652	0.72033	0.00660066	0.273927	0.0792079	1985	both	National	Czech Republic	Central and Eastern Europe
CZE	CZE_1985_MONICA	2	55	346	29.4975	0.310907	0.00289017	0.424855	0.150289	1985	both	National	Czech Republic	Central and Eastern Europe
CZE	CZE_1985_MONICA	2	62.5	153	30.5217	0.577862	0.00653595	0.496732	0.183007	1985	both	National	Czech Republic	Central and Eastern Europe
CZE	CZE_1988_MONICA	1	27.5	126	25.5285	0.268146	0	0.103175	0	1988	both	National	Czech Republic	Central and Eastern Europe
CZE	CZE_1988_MONICA	1	35	344	26.66	0.199281	0.00290698	0.151163	0.0203488	1988	both	National	Czech Republic	Central and Eastern Europe
CZE	CZE_1988_MONICA	1	45	365	27.7122	0.181666	0	0.243836	0.0356164	1988	both	National	Czech Republic	Central and Eastern Europe
CZE	CZE_1988_MONICA	1	55	339	28.7809	0.330209	0	0.353982	0.0648968	1988	both	National	Czech Republic	Central and Eastern Europe
CZE	CZE_1988_MONICA	1	62.5	183	28.9513	0.234839	0	0.355191	0.0710383	1988	both	National	Czech Republic	Central and Eastern Europe
CZE	CZE_1988_MONICA	2	27.5	131	23.4602	0.263867	0.0381679	0.0763359	0.0229008	1988	both	National	Czech Republic	Central and Eastern Europe
CZE	CZE_1988_MONICA	2	35	381	25.3106	0.136311	0.0104987	0.144357	0.0472441	1988	both	National	Czech Republic	Central and Eastern Europe
CZE	CZE_1988_MONICA	2	45	371	28.0355	0.251331	0	0.269542	0.0889488	1988	both	National	Czech Republic	Central and Eastern Europe
CZE	CZE_1988_MONICA	2	55	333	30.1934	0.308214	0	0.48048	0.186186	1988	both	National	Czech Republic	Central and Eastern Europe
CZE	CZE_1988_MONICA	2	62.5	192	30.453	0.375603	0.00520833	0.484375	0.177083	1988	both	National	Czech Republic	Central and Eastern Europe
CZE	CZE_1992_MONICA	1	27.5	122	24.8155	0.150297	0.00819672	0.0409836	0	1992	both	National	Czech Republic	Central and Eastern Europe
CZE	CZE_1992_MONICA	1	35	293	26.3092	0.217727	0	0.139932	0.0170648	1992	both	National	Czech Republic	Central and Eastern Europe
CZE	CZE_1992_MONICA	1	45	337	27.31	0.172243	0.00296736	0.198813	0.0207715	1992	both	National	Czech Republic	Central and Eastern Europe
CZE	CZE_1992_MONICA	1	55	268	27.985	0.342291	0.00746269	0.276119	0.0485075	1992	both	National	Czech Republic	Central and Eastern Europe
CZE	CZE_1992_MONICA	1	62.5	111	28.8692	0.319202	0	0.342342	0.0720721	1992	both	National	Czech Republic	Central and Eastern Europe
CZE	CZE_1992_MONICA	2	27.5	114	22.8698	0.359005	0.0789474	0.0438596	0	1992	both	National	Czech Republic	Central and Eastern Europe
CZE	CZE_1992_MONICA	2	35	333	24.6604	0.337433	0.021021	0.132132	0.0540541	1992	both	National	Czech Republic	Central and Eastern Europe
CZE	CZE_1992_MONICA	2	45	351	27.0399	0.406731	0.00854701	0.236467	0.0740741	1992	both	National	Czech Republic	Central and Eastern Europe
CZE	CZE_1992_MONICA	2	55	272	29.5766	0.198902	0	0.389706	0.143382	1992	both	National	Czech Republic	Central and Eastern Europe
CZE	CZE_1992_MONICA	2	62.5	137	29.9716	0.340333	0.00729927	0.510949	0.124088	1992	both	National	Czech Republic	Central and Eastern Europe
DEU	DEU_1985_INTERSALT-Cottbus	1	25	25	23.4107	0.725667	0.08	0.08	0	1985	urban	Community	Germany	High-income Western countries
DEU	DEU_1985_INTERSALT-Cottbus	1	35	25	25.2929	0.64323	0	0.12	0	1985	urban	Community	Germany	High-income Western countries
DEU	DEU_1985_INTERSALT-Cottbus	1	45	25	26.5868	0.561445	0	0.12	0	1985	urban	Community	Germany	High-income Western countries
DEU	DEU_1985_INTERSALT-Cottbus	1	55	24	26.6813	0.651206	0	0.166667	0	1985	urban	Community	Germany	High-income Western countries
DEU	DEU_1985_INTERSALT-Cottbus	2	25	24	21.6047	0.458768	0.0416667	0	0	1985	urban	Community	Germany	High-income Western countries
DEU	DEU_1985_INTERSALT-Cottbus	2	35	25	23.9903	0.84794	0	0.12	0.04	1985	urban	Community	Germany	High-income Western countries
DEU	DEU_1985_INTERSALT-Cottbus	2	45	25	23.795	0.572327	0	0.08	0	1985	urban	Community	Germany	High-income Western countries
DEU	DEU_1985_INTERSALT-Cottbus	2	55	25	28.1848	0.911103	0	0.2	0.12	1985	urban	Community	Germany	High-income Western countries
DEU	DEU_1985_INTERSALT-Heidelberg	1	25	22	23.399	0.565151	0	0	0	1985	urban	Community	Germany	High-income Western countries
DEU	DEU_1985_INTERSALT-Heidelberg	1	35	25	24.5079	0.532268	0	0.04	0	1985	urban	Community	Germany	High-income Western countries
DEU	DEU_1985_INTERSALT-Heidelberg	1	45	25	25.6627	0.541213	0	0.08	0	1985	urban	Community	Germany	High-income Western countries
DEU	DEU_1985_INTERSALT-Heidelberg	1	55	25	27.1274	0.645141	0	0.16	0.04	1985	urban	Community	Germany	High-income Western countries
DEU	DEU_1985_INTERSALT-Heidelberg	2	25	24	21.7023	0.493201	0.0416667	0	0	1985	urban	Community	Germany	High-income Western countries
DEU	DEU_1985_INTERSALT-Heidelberg	2	35	25	22.8915	0.535919	0	0	0	1985	urban	Community	Germany	High-income Western countries
DEU	DEU_1985_INTERSALT-Heidelberg	2	45	25	24.2082	0.632057	0	0	0	1985	urban	Community	Germany	High-income Western countries
DEU	DEU_1985_INTERSALT-Heidelberg	2	55	25	26.3109	0.810868	0	0.16	0.04	1985	urban	Community	Germany	High-income Western countries
DEU	DEU_1985_MONICA-AUG	2	27.5	208	22.4959	0.209496	0.0432692	0.0384615	0.00480769	1985	both	Community	Germany	High-income Western countries
DEU	DEU_1985_MONICA-AUG	2	35	455	24.1953	0.172903	0.00659341	0.0681319	0.0153846	1985	both	Community	Germany	High-income Western countries
DEU	DEU_1985_MONICA-AUG	2	45	593	25.6036	0.180318	0.00505902	0.134907	0.0387858	1985	both	Community	Germany	High-income Western countries
DEU	DEU_1985_MONICA-AUG	2	55	442	27.953	0.227161	0.00226244	0.282805	0.0927602	1985	both	Community	Germany	High-income Western countries
DEU	DEU_1985_MONICA-AUG	2	62.5	263	28.4573	0.27938	0.00380228	0.326996	0.0988593	1985	both	Community	Germany	High-income Western countries
DEU	DEU_1985_MONICA-AUG	1	27.5	226	24.5958	0.217307	0.00884956	0.0663717	0.00442478	1985	both	Community	Germany	High-income Western countries
DEU	DEU_1985_MONICA-AUG	1	35	430	26.0197	0.166693	0.00232558	0.123256	0.0162791	1985	both	Community	Germany	High-income Western countries
DEU	DEU_1985_MONICA-AUG	1	45	565	27.2	0.146249	0	0.169911	0.0283186	1985	both	Community	Germany	High-income Western countries
DEU	DEU_1985_MONICA-AUG	1	55	521	27.7237	0.141159	0	0.213052	0.024952	1985	both	Community	Germany	High-income Western countries
DEU	DEU_1985_MONICA-AUG	1	62.5	263	27.7805	0.199855	0	0.239544	0.0114068	1985	both	Community	Germany	High-income Western countries
DEU	DEU_1985_MONICA-COTa	2	27.5	85	22.5819	0.3193	0.0588235	0.0235294	0	1985	urban	Community	Germany	High-income Western countries
DEU	DEU_1985_MONICA-COTa	2	35	201	24.5617	0.335135	0.0199005	0.114428	0.0348259	1985	urban	Community	Germany	High-income Western countries
DEU	DEU_1985_MONICA-COTa	2	45	213	26.2291	0.332966	0	0.211268	0.0657277	1985	urban	Community	Germany	High-income Western countries
DEU	DEU_1985_MONICA-COTa	2	55	167	27.7665	0.315445	0	0.257485	0.0479042	1985	urban	Community	Germany	High-income Western countries
DEU	DEU_1985_MONICA-COTa	2	62.5	73	28.5869	0.543642	0.0136986	0.39726	0.136986	1985	urban	Community	Germany	High-income Western countries
DEU	DEU_1985_MONICA-COTa	1	27.5	83	24.9901	0.373198	0	0.0843374	0.0120482	1985	urban	Community	Germany	High-income Western countries
DEU	DEU_1985_MONICA-COTa	1	35	199	25.7754	0.237008	0	0.0954774	0.0201005	1985	urban	Community	Germany	High-income Western countries
DEU	DEU_1985_MONICA-COTa	1	45	193	26.5829	0.254645	0.00518135	0.160622	0.0207254	1985	urban	Community	Germany	High-income Western countries
DEU	DEU_1985_MONICA-COTa	1	55	144	27.6418	0.286242	0	0.229167	0.0277778	1985	urban	Community	Germany	High-income Western countries
DEU	DEU_1985_MONICA-COTa	1	62.5	38	26.2709	0.559201	0.0263158	0.105263	0	1985	urban	Community	Germany	High-income Western countries
DEU	DEU_1985_MONICA-RHNa	1	30	330	24.5	0.2	0	0	0	1985	urban	Community	Germany	High-income Western countries
DEU	DEU_1985_MONICA-RHNa	1	40	415	25.6	0.2	0	0	0	1985	urban	Community	Germany	High-income Western countries
DEU	DEU_1985_MONICA-RHNa	1	50	431	26.9	0.2	0	0	0	1985	urban	Community	Germany	High-income Western countries
DEU	DEU_1985_MONICA-RHNa	1	60	313	27.2	0.2	0	0	0	1985	urban	Community	Germany	High-income Western countries
DEU	DEU_1985_MONICA-RHNa	2	30	339	22.9	0.2	0	0	0	1985	urban	Community	Germany	High-income Western countries
DEU	DEU_1985_MONICA-RHNa	2	40	445	23.8	0.2	0	0	0	1985	urban	Community	Germany	High-income Western countries
DEU	DEU_1985_MONICA-RHNa	2	50	453	25.3	0.2	0	0	0	1985	urban	Community	Germany	High-income Western countries
DEU	DEU_1985_MONICA-RHNa	2	60	372	26.8	0.2	0	0	0	1985	urban	Community	Germany	High-income Western countries
DEU	DEU_1986_INTERSALT-Bernried	1	25	25	23.8321	0.642973	0	0.08	0	1986	urban	Community	Germany	High-income Western countries
DEU	DEU_1986_INTERSALT-Bernried	1	35	24	25.6373	0.764665	0	0.0416667	0.0416667	1986	urban	Community	Germany	High-income Western countries
DEU	DEU_1986_INTERSALT-Bernried	1	45	25	24.6934	0.637297	0	0.08	0	1986	urban	Community	Germany	High-income Western countries
DEU	DEU_1986_INTERSALT-Bernried	1	55	25	27.9786	0.665098	0	0.16	0.08	1986	urban	Community	Germany	High-income Western countries
DEU	DEU_1986_INTERSALT-Bernried	2	25	23	21.605	0.426436	0	0	0	1986	urban	Community	Germany	High-income Western countries
DEU	DEU_1986_INTERSALT-Bernried	2	35	25	23.3256	0.50549	0	0.04	0	1986	urban	Community	Germany	High-income Western countries
DEU	DEU_1986_INTERSALT-Bernried	2	45	25	22.7734	0.609812	0.04	0.04	0	1986	urban	Community	Germany	High-income Western countries
DEU	DEU_1986_INTERSALT-Bernried	2	55	25	26.4512	1.00247	0	0.2	0.04	1986	urban	Community	Germany	High-income Western countries
DEU	DEU_1987_MONICA-ERF	2	27.5	129	22.3082	0.264943	0.0232558	0.0155039	0	1987	urban	Community	Germany	High-income Western countries
DEU	DEU_1987_MONICA-ERF	2	35	270	23.875	0.261938	0.0333333	0.103704	0.0222222	1987	urban	Community	Germany	High-income Western countries
DEU	DEU_1987_MONICA-ERF	2	45	249	24.9967	0.263354	0.0281125	0.104418	0.0200803	1987	urban	Community	Germany	High-income Western countries
DEU	DEU_1987_MONICA-ERF	2	55	182	27.6608	0.377806	0.00549451	0.269231	0.0769231	1987	urban	Community	Germany	High-income Western countries
DEU	DEU_1987_MONICA-ERF	2	62.5	79	27.3054	0.503799	0	0.227848	0.0632911	1987	urban	Community	Germany	High-income Western countries
DEU	DEU_1987_MONICA-ERF	1	27.5	118	24.3408	0.295218	0.00847458	0.0338983	0	1987	urban	Community	Germany	High-income Western countries
DEU	DEU_1987_MONICA-ERF	1	35	256	25.2663	0.23045	0.00390625	0.109375	0.0234375	1987	urban	Community	Germany	High-income Western countries
DEU	DEU_1987_MONICA-ERF	1	45	252	26.0235	0.244151	0	0.119048	0.0119048	1987	urban	Community	Germany	High-income Western countries
DEU	DEU_1987_MONICA-ERF	1	55	194	26.853	0.298521	0	0.170103	0.0360825	1987	urban	Community	Germany	High-income Western countries
DEU	DEU_1987_MONICA-ERF	1	62.5	51	27.1809	0.438946	0	0.215686	0	1987	urban	Community	Germany	High-income Western countries
DEU	DEU_1988_MONICA-BERa	2	27.5	82	22.9054	0.411428	0.0243902	0.0853658	0.0121951	1988	urban	Community	Germany	High-income Western countries
DEU	DEU_1988_MONICA-BERa	2	35	167	23.9132	0.31297	0.0419162	0.0898204	0.0179641	1988	urban	Community	Germany	High-income Western countries
DEU	DEU_1988_MONICA-BERa	2	45	205	24.9918	0.317965	0.0292683	0.126829	0.0439024	1988	urban	Community	Germany	High-income Western countries
DEU	DEU_1988_MONICA-BERa	2	55	194	26.5614	0.320454	0.00515464	0.154639	0.056701	1988	urban	Community	Germany	High-income Western countries
DEU	DEU_1988_MONICA-BERa	2	62.5	80	27.5153	0.479711	0	0.225	0.075	1988	urban	Community	Germany	High-income Western countries
DEU	DEU_1988_MONICA-BERa	1	27.5	69	23.2745	0.396406	0.0434783	0.0434783	0	1988	urban	Community	Germany	High-income Western countries
DEU	DEU_1988_MONICA-BERa	1	35	158	25.2702	0.272365	0	0.0949367	0.0126582	1988	urban	Community	Germany	High-income Western countries
DEU	DEU_1988_MONICA-BERa	1	45	189	25.9317	0.269188	0	0.132275	0.031746	1988	urban	Community	Germany	High-income Western countries
DEU	DEU_1988_MONICA-BERa	1	55	207	27.0471	0.241628	0	0.173913	0.0289855	1988	urban	Community	Germany	High-income Western countries
DEU	DEU_1988_MONICA-BERa	1	62.5	67	26.3042	0.420629	0.0298507	0.104478	0.0149254	1988	urban	Community	Germany	High-income Western countries
DEU	DEU_1988_MONICA-BRE1	2	27.5	75	23.3557	0.461145	0.04	0.0533333	0.0133333	1988	urban	Community	Germany	High-income Western countries
DEU	DEU_1988_MONICA-BRE1	2	35	128	24.6261	0.473328	0.03125	0.125	0.0390625	1988	urban	Community	Germany	High-income Western countries
DEU	DEU_1988_MONICA-BRE1	2	45	164	25.4722	0.323383	0.0121951	0.128049	0.0365854	1988	urban	Community	Germany	High-income Western countries
DEU	DEU_1988_MONICA-BRE1	2	55	147	27.194	0.336769	0	0.210884	0.0544218	1988	urban	Community	Germany	High-income Western countries
DEU	DEU_1988_MONICA-BRE1	2	65	118	27.7726	0.39958	0	0.237288	0.059322	1988	urban	Community	Germany	High-income Western countries
DEU	DEU_1988_MONICA-BRE1	1	27.5	83	24.4288	0.374906	0.0120482	0.060241	0.0120482	1988	urban	Community	Germany	High-income Western countries
DEU	DEU_1988_MONICA-BRE1	1	35	146	25.1403	0.31387	0.0136986	0.0958904	0.0273973	1988	urban	Community	Germany	High-income Western countries
DEU	DEU_1988_MONICA-BRE1	1	45	150	26.6729	0.267897	0	0.12	0.02	1988	urban	Community	Germany	High-income Western countries
DEU	DEU_1988_MONICA-BRE1	1	55	148	27.7268	0.286282	0	0.27027	0.0135135	1988	urban	Community	Germany	High-income Western countries
DEU	DEU_1988_MONICA-BRE1	1	65	92	27.3439	0.323596	0.0217391	0.173913	0.0108696	1988	urban	Community	Germany	High-income Western countries
DEU	DEU_1988_MONICA-BRE2	2	27.5	70	22.3264	0.444191	0.0714286	0.0285714	0.0142857	1988	urban	Community	Germany	High-income Western countries
DEU	DEU_1988_MONICA-BRE2	2	35	133	23.028	0.310232	0.0300752	0.0300752	0.0075188	1988	urban	Community	Germany	High-income Western countries
DEU	DEU_1988_MONICA-BRE2	2	45	140	24.3518	0.338402	0.0285714	0.1	0.0142857	1988	urban	Community	Germany	High-income Western countries
DEU	DEU_1988_MONICA-BRE2	2	55	138	25.7178	0.30768	0	0.152174	0.00724638	1988	urban	Community	Germany	High-income Western countries
DEU	DEU_1988_MONICA-BRE2	2	65	101	26.0323	0.431773	0.019802	0.207921	0.019802	1988	urban	Community	Germany	High-income Western countries
DEU	DEU_1988_MONICA-BRE2	1	27.5	60	23.5098	0.436707	0.0333333	0.0666667	0	1988	urban	Community	Germany	High-income Western countries
DEU	DEU_1988_MONICA-BRE2	1	35	117	24.7609	0.284163	0	0.051282	0.00854701	1988	urban	Community	Germany	High-income Western countries
DEU	DEU_1988_MONICA-BRE2	1	45	139	25.7318	0.307607	0.00719425	0.100719	0.0143885	1988	urban	Community	Germany	High-income Western countries
DEU	DEU_1988_MONICA-BRE2	1	55	114	26.867	0.319557	0	0.175439	0.00877193	1988	urban	Community	Germany	High-income Western countries
DEU	DEU_1988_MONICA-BRE2	1	65	69	27.0172	0.415216	0.0144928	0.202899	0.0144928	1988	urban	Community	Germany	High-income Western countries
DEU	DEU_1988_MONICA-CHM	2	27.5	38	23.067	0.496971	0	0.0526316	0	1988	urban	Community	Germany	High-income Western countries
DEU	DEU_1988_MONICA-CHM	2	35	84	23.7271	0.468546	0.0357143	0.0952381	0.0238095	1988	urban	Community	Germany	High-income Western countries
DEU	DEU_1988_MONICA-CHM	2	45	104	25.2601	0.392949	0.00961539	0.134615	0.0192308	1988	urban	Community	Germany	High-income Western countries
DEU	DEU_1988_MONICA-CHM	2	55	107	28.0525	0.646511	0	0.299065	0.0747663	1988	urban	Community	Germany	High-income Western countries
DEU	DEU_1988_MONICA-CHM	2	62.5	49	27.9704	0.689548	0.0204082	0.244898	0.0816327	1988	urban	Community	Germany	High-income Western countries
DEU	DEU_1988_MONICA-CHM	1	27.5	45	23.5039	0.573191	0	0.0666667	0.0222222	1988	urban	Community	Germany	High-income Western countries
DEU	DEU_1988_MONICA-CHM	1	35	69	25.5443	0.368259	0	0.101449	0.0144928	1988	urban	Community	Germany	High-income Western countries
DEU	DEU_1988_MONICA-CHM	1	45	86	26.1767	0.361061	0	0.162791	0.0116279	1988	urban	Community	Germany	High-income Western countries
DEU	DEU_1988_MONICA-CHM	1	55	61	26.6562	0.426136	0	0.163934	0.0163934	1988	urban	Community	Germany	High-income Western countries
DEU	DEU_1988_MONICA-CHM	1	62.5	27	25.5285	0.61361	0	0.037037	0	1988	urban	Community	Germany	High-income Western countries
DEU	DEU_1988_MONICA-ZWK	2	27.5	27	23.7422	0.691957	0.037037	0.037037	0	1988	urban	Community	Germany	High-income Western countries
DEU	DEU_1988_MONICA-ZWK	2	35	67	24.4268	0.493365	0.0149254	0.0895522	0.0298507	1988	urban	Community	Germany	High-income Western countries
DEU	DEU_1988_MONICA-ZWK	2	45	63	26.3704	0.612515	0	0.190476	0.0476191	1988	urban	Community	Germany	High-income Western countries
DEU	DEU_1988_MONICA-ZWK	2	55	64	27.0934	0.626174	0.015625	0.265625	0.078125	1988	urban	Community	Germany	High-income Western countries
DEU	DEU_1988_MONICA-ZWK	2	62.5	29	27.146	0.75821	0	0.206897	0.0344828	1988	urban	Community	Germany	High-income Western countries
DEU	DEU_1988_MONICA-ZWK	1	27.5	19	24.3639	0.796079	0	0.105263	0	1988	urban	Community	Germany	High-income Western countries
DEU	DEU_1988_MONICA-ZWK	1	35	52	24.6372	0.457196	0.0576923	0.0384615	0.0192308	1988	urban	Community	Germany	High-income Western countries
DEU	DEU_1988_MONICA-ZWK	1	45	53	26.1788	0.461715	0	0.132075	0.0188679	1988	urban	Community	Germany	High-income Western countries
DEU	DEU_1988_MONICA-ZWK	1	55	51	26.5451	0.563204	0.0196078	0.215686	0.0196078	1988	urban	Community	Germany	High-income Western countries
DEU	DEU_1988_MONICA-ZWK	1	62.5	18	28.2508	0.481745	0	0.222222	0	1988	urban	Community	Germany	High-income Western countries
DEU	DEU_1989_MONICA-COTa	2	27.5	84	23.1981	0.42439	0.0357143	0.0714286	0.0238095	1989	urban	Community	Germany	High-income Western countries
DEU	DEU_1989_MONICA-COTa	2	35	159	24.6038	0.3355	0.0188679	0.113208	0.0314465	1989	urban	Community	Germany	High-income Western countries
DEU	DEU_1989_MONICA-COTa	2	45	121	26.2449	0.470362	0.00826446	0.165289	0.0413223	1989	urban	Community	Germany	High-income Western countries
DEU	DEU_1989_MONICA-COTa	2	55	121	27.5033	0.43088	0	0.297521	0.0909091	1989	urban	Community	Germany	High-income Western countries
DEU	DEU_1989_MONICA-COTa	2	62.5	44	28.7019	0.975129	0	0.272727	0.113636	1989	urban	Community	Germany	High-income Western countries
DEU	DEU_1989_MONICA-COTa	1	27.5	66	24.4582	0.433175	0.0151515	0.0606061	0.0151515	1989	urban	Community	Germany	High-income Western countries
DEU	DEU_1989_MONICA-COTa	1	35	166	25.9361	0.257522	0	0.108434	0.0120482	1989	urban	Community	Germany	High-income Western countries
DEU	DEU_1989_MONICA-COTa	1	45	138	26.948	0.295228	0	0.173913	0.00724638	1989	urban	Community	Germany	High-income Western countries
DEU	DEU_1989_MONICA-COTa	1	55	121	27.8122	0.379878	0	0.264463	0.0661157	1989	urban	Community	Germany	High-income Western countries
DEU	DEU_1989_MONICA-COTa	1	62.5	48	27.5687	0.459377	0	0.166667	0.0208333	1989	urban	Community	Germany	High-income Western countries
DEU	DEU_1989_MONICA-HACa	2	27.5	152	22.804	0.286338	0.0328947	0.0328947	0.0131579	1989	urban	Subnational	Germany	High-income Western countries
DEU	DEU_1989_MONICA-HACa	2	35	326	24.6263	0.260318	0.0122699	0.116564	0.0460123	1989	urban	Subnational	Germany	High-income Western countries
DEU	DEU_1989_MONICA-HACa	2	45	316	26.9053	0.29963	0	0.240506	0.0886076	1989	urban	Subnational	Germany	High-income Western countries
DEU	DEU_1989_MONICA-HACa	2	55	284	28.3272	0.316138	0.0105634	0.330986	0.102113	1989	urban	Subnational	Germany	High-income Western countries
DEU	DEU_1989_MONICA-HACa	2	62.5	123	28.7906	0.512559	0.00813008	0.357724	0.130081	1989	urban	Subnational	Germany	High-income Western countries
DEU	DEU_1989_MONICA-HACa	1	27.5	120	25.1832	0.360627	0.00833333	0.075	0.0166667	1989	urban	Subnational	Germany	High-income Western countries
DEU	DEU_1989_MONICA-HACa	1	35	250	26.3308	0.251707	0.004	0.124	0.028	1989	urban	Subnational	Germany	High-income Western countries
DEU	DEU_1989_MONICA-HACa	1	45	265	26.8554	0.214011	0	0.139623	0.0301887	1989	urban	Subnational	Germany	High-income Western countries
DEU	DEU_1989_MONICA-HACa	1	55	239	27.5023	0.242329	0	0.230126	0.0251046	1989	urban	Subnational	Germany	High-income Western countries
DEU	DEU_1989_MONICA-HACa	1	62.5	85	26.9984	0.361725	0.0117647	0.152941	0.0235294	1989	urban	Subnational	Germany	High-income Western countries
DEU	DEU_1989_MONICA-KMS	2	27.5	80	23.4872	0.515526	0.1125	0.075	0.0375	1989	urban	Subnational	Germany	High-income Western countries
DEU	DEU_1989_MONICA-KMS	2	35	171	24.8311	0.33895	0.0233918	0.111111	0.0292398	1989	urban	Subnational	Germany	High-income Western countries
DEU	DEU_1989_MONICA-KMS	2	45	154	25.85	0.301588	0.012987	0.155844	0.012987	1989	urban	Subnational	Germany	High-income Western countries
DEU	DEU_1989_MONICA-KMS	2	55	148	27.6535	0.37246	0	0.256757	0.0810811	1989	urban	Subnational	Germany	High-income Western countries
DEU	DEU_1989_MONICA-KMS	2	62.5	73	28.8854	0.517275	0	0.369863	0.0684932	1989	urban	Subnational	Germany	High-income Western countries
DEU	DEU_1989_MONICA-KMS	1	27.5	66	24.5168	0.356968	0.0151515	0.030303	0	1989	urban	Subnational	Germany	High-income Western countries
DEU	DEU_1989_MONICA-KMS	1	35	156	25.7427	0.251498	0	0.108974	0.0128205	1989	urban	Subnational	Germany	High-income Western countries
DEU	DEU_1989_MONICA-KMS	1	45	128	26.6689	0.318624	0	0.164062	0.03125	1989	urban	Subnational	Germany	High-income Western countries
DEU	DEU_1989_MONICA-KMS	1	55	141	27.2086	0.283122	0	0.170213	0.0141844	1989	urban	Subnational	Germany	High-income Western countries
DEU	DEU_1989_MONICA-KMS	1	62.5	50	27.0377	0.515624	0.02	0.16	0.02	1989	urban	Subnational	Germany	High-income Western countries
DEU	DEU_1990_MONICA-AUG	2	27.5	238	23.0678	0.331253	0.0294118	0.0504202	0.0168067	1990	both	Community	Germany	High-income Western countries
DEU	DEU_1990_MONICA-AUG	2	35	448	24.2882	0.409217	0.0178571	0.100446	0.0290179	1990	both	Community	Germany	High-income Western countries
DEU	DEU_1990_MONICA-AUG	2	45	496	25.6196	0.278096	0.0201613	0.163306	0.0362903	1990	both	Community	Germany	High-income Western countries
DEU	DEU_1990_MONICA-AUG	2	55	510	27.2981	0.292137	0.00588235	0.252941	0.0647059	1990	both	Community	Germany	High-income Western countries
DEU	DEU_1990_MONICA-AUG	2	62.5	252	28.4004	0.34247	0.0119048	0.349206	0.0833333	1990	both	Community	Germany	High-income Western countries
DEU	DEU_1990_MONICA-AUG	1	27.5	241	25.0142	0.242829	0.0124481	0.0871369	0.00829875	1990	both	Community	Germany	High-income Western countries
DEU	DEU_1990_MONICA-AUG	1	35	439	25.934	0.231913	0.00455581	0.104784	0.0136674	1990	both	Community	Germany	High-income Western countries
DEU	DEU_1990_MONICA-AUG	1	45	491	26.9974	0.22952	0	0.175153	0.0285132	1990	both	Community	Germany	High-income Western countries
DEU	DEU_1990_MONICA-AUG	1	55	528	27.7767	0.264221	0.00189394	0.219697	0.0397727	1990	both	Community	Germany	High-income Western countries
DEU	DEU_1990_MONICA-AUG	1	62.5	234	27.712	0.202059	0.0042735	0.217949	0.017094	1990	both	Community	Germany	High-income Western countries
DEU	DEU_1991_MONICA-BRE1	2	27.5	93	22.937	0.331223	0.0430108	0.0430108	0	1991	urban	Community	Germany	High-income Western countries
DEU	DEU_1991_MONICA-BRE1	2	35	144	23.8613	0.356626	0.0277778	0.0833333	0.0347222	1991	urban	Community	Germany	High-income Western countries
DEU	DEU_1991_MONICA-BRE1	2	45	149	26.0439	0.394325	0.0134228	0.167785	0.0604027	1991	urban	Community	Germany	High-income Western countries
DEU	DEU_1991_MONICA-BRE1	2	55	153	26.8631	0.361148	0.00653595	0.20915	0.0718954	1991	urban	Community	Germany	High-income Western countries
DEU	DEU_1991_MONICA-BRE1	2	65	132	28.0196	0.404092	0.00757576	0.272727	0.106061	1991	urban	Community	Germany	High-income Western countries
DEU	DEU_1991_MONICA-BRE1	1	27.5	92	24.4385	0.346492	0.0108696	0.076087	0.0108696	1991	urban	Community	Germany	High-income Western countries
DEU	DEU_1991_MONICA-BRE1	1	35	136	25.2157	0.285732	0	0.0808824	0.00735294	1991	urban	Community	Germany	High-income Western countries
DEU	DEU_1991_MONICA-BRE1	1	45	131	27.0332	0.339173	0	0.183206	0.0305344	1991	urban	Community	Germany	High-income Western countries
DEU	DEU_1991_MONICA-BRE1	1	55	137	27.527	0.298176	0	0.175183	0.0437956	1991	urban	Community	Germany	High-income Western countries
DEU	DEU_1991_MONICA-BRE1	1	65	103	26.9246	0.360453	0.00970874	0.165049	0.0194175	1991	urban	Community	Germany	High-income Western countries
DEU	DEU_1991_MONICA-BRE2	2	27.5	74	22.1492	0.328627	0.0405405	0.027027	0	1991	urban	Community	Germany	High-income Western countries
DEU	DEU_1991_MONICA-BRE2	2	35	132	23.4899	0.309371	0.030303	0.0606061	0.00757576	1991	urban	Community	Germany	High-income Western countries
DEU	DEU_1991_MONICA-BRE2	2	45	114	25.034	0.395794	0	0.122807	0.0175439	1991	urban	Community	Germany	High-income Western countries
DEU	DEU_1991_MONICA-BRE2	2	55	137	26.2946	0.385735	0	0.160584	0.0437956	1991	urban	Community	Germany	High-income Western countries
DEU	DEU_1991_MONICA-BRE2	2	65	89	27.4072	0.477931	0	0.235955	0.0561798	1991	urban	Community	Germany	High-income Western countries
DEU	DEU_1991_MONICA-BRE2	1	27.5	61	24.2172	0.376936	0	0.0491803	0	1991	urban	Community	Germany	High-income Western countries
DEU	DEU_1991_MONICA-BRE2	1	35	127	24.9487	0.299132	0.015748	0.0393701	0.015748	1991	urban	Community	Germany	High-income Western countries
DEU	DEU_1991_MONICA-BRE2	1	45	125	26.481	0.317948	0	0.144	0.024	1991	urban	Community	Germany	High-income Western countries
DEU	DEU_1991_MONICA-BRE2	1	55	148	27.3587	0.265806	0	0.202703	0.0135135	1991	urban	Community	Germany	High-income Western countries
DEU	DEU_1991_MONICA-BRE2	1	65	63	26.7901	0.416401	0.015873	0.142857	0.015873	1991	urban	Community	Germany	High-income Western countries
DEU	DEU_1992_MONICA-ERF	2	27.5	73	23.5764	0.418002	0.0136986	0.0410959	0.0136986	1992	urban	Community	Germany	High-income Western countries
DEU	DEU_1992_MONICA-ERF	2	35	153	24.2806	0.371842	0.0326797	0.104575	0.0196078	1992	urban	Community	Germany	High-income Western countries
DEU	DEU_1992_MONICA-ERF	2	45	139	26.2808	0.394375	0	0.201439	0.057554	1992	urban	Community	Germany	High-income Western countries
DEU	DEU_1992_MONICA-ERF	2	55	148	26.8199	0.389103	0.0135135	0.236487	0.0743243	1992	urban	Community	Germany	High-income Western countries
DEU	DEU_1992_MONICA-ERF	2	62.5	59	29.1773	0.547	0	0.474576	0.0677966	1992	urban	Community	Germany	High-income Western countries
DEU	DEU_1992_MONICA-ERF	1	27.5	86	24.3228	0.38762	0.0232558	0.0465116	0	1992	urban	Community	Germany	High-income Western countries
DEU	DEU_1992_MONICA-ERF	1	35	165	25.483	0.281137	0.0121212	0.0909091	0.030303	1992	urban	Community	Germany	High-income Western countries
DEU	DEU_1992_MONICA-ERF	1	45	136	25.9355	0.281917	0.00735294	0.102941	0	1992	urban	Community	Germany	High-income Western countries
DEU	DEU_1992_MONICA-ERF	1	55	150	26.8954	0.301528	0	0.173333	0.02	1992	urban	Community	Germany	High-income Western countries
DEU	DEU_1992_MONICA-ERF	1	62.5	50	27.0028	0.480726	0.02	0.16	0	1992	urban	Community	Germany	High-income Western countries
DEU	DEU_1994_MONICA-CHM	2	27.5	34	22.3694	0.548927	0.0294118	0.0294118	0	1994	urban	Community	Germany	High-income Western countries
DEU	DEU_1994_MONICA-CHM	2	35	83	24.9815	0.533652	0	0.13253	0.0722891	1994	urban	Community	Germany	High-income Western countries
DEU	DEU_1994_MONICA-CHM	2	45	98	25.4014	0.397237	0	0.132653	0.0306122	1994	urban	Community	Germany	High-income Western countries
DEU	DEU_1994_MONICA-CHM	2	55	156	27.3478	0.369848	0	0.23718	0.0833333	1994	urban	Community	Germany	High-income Western countries
DEU	DEU_1994_MONICA-CHM	2	62.5	53	29.1588	0.999504	0	0.339623	0.113208	1994	urban	Community	Germany	High-income Western countries
DEU	DEU_1994_MONICA-CHM	1	27.5	37	24.028	0.425453	0	0.027027	0	1994	urban	Community	Germany	High-income Western countries
DEU	DEU_1994_MONICA-CHM	1	35	87	25.2838	0.344338	0.0114942	0.0804598	0	1994	urban	Community	Germany	High-income Western countries
DEU	DEU_1994_MONICA-CHM	1	45	91	26.7761	0.360905	0.010989	0.153846	0.010989	1994	urban	Community	Germany	High-income Western countries
DEU	DEU_1994_MONICA-CHM	1	55	132	27.6223	0.302901	0	0.19697	0.0378788	1994	urban	Community	Germany	High-income Western countries
DEU	DEU_1994_MONICA-CHM	1	62.5	61	27.8817	0.496986	0	0.278688	0.0327869	1994	urban	Community	Germany	High-income Western countries
DEU	DEU_1994_MONICA-ZWK	2	27.5	20	22.487	0.572337	0	0	0	1994	urban	Community	Germany	High-income Western countries
DEU	DEU_1994_MONICA-ZWK	2	35	41	24.6906	0.853258	0.0487805	0.097561	0.0731707	1994	urban	Community	Germany	High-income Western countries
DEU	DEU_1994_MONICA-ZWK	2	45	40	25.3661	0.647827	0	0.125	0.025	1994	urban	Community	Germany	High-income Western countries
DEU	DEU_1994_MONICA-ZWK	2	55	57	26.2417	0.448439	0	0.157895	0	1994	urban	Community	Germany	High-income Western countries
DEU	DEU_1994_MONICA-ZWK	2	62.5	28	28.5263	1.44861	0	0.214286	0.107143	1994	urban	Community	Germany	High-income Western countries
DEU	DEU_1994_MONICA-ZWK	1	27.5	13	23.8087	1.21057	0.0769231	0.0769231	0	1994	urban	Community	Germany	High-income Western countries
DEU	DEU_1994_MONICA-ZWK	1	35	34	24.8698	0.501783	0	0.0588235	0	1994	urban	Community	Germany	High-income Western countries
DEU	DEU_1994_MONICA-ZWK	1	45	32	26.5755	0.597079	0.03125	0.1875	0	1994	urban	Community	Germany	High-income Western countries
DEU	DEU_1994_MONICA-ZWK	1	55	44	26.4537	0.54322	0	0.181818	0	1994	urban	Community	Germany	High-income Western countries
DEU	DEU_1994_MONICA-ZWK	1	62.5	16	28.2404	0.903239	0.0625	0.25	0	1994	urban	Community	Germany	High-income Western countries
DEU	DEU_1995_MONICA-AUG	2	27.5	212	22.9488	0.301308	0.0283019	0.0471698	0.0188679	1995	both	Community	Germany	High-income Western countries
DEU	DEU_1995_MONICA-AUG	2	35	482	24.6536	0.264007	0.0186722	0.136929	0.0435685	1995	both	Community	Germany	High-income Western countries
DEU	DEU_1995_MONICA-AUG	2	45	489	25.9406	0.280121	0.00408998	0.182004	0.0511247	1995	both	Community	Germany	High-income Western countries
DEU	DEU_1995_MONICA-AUG	2	55	575	27.63	0.223716	0.00347826	0.248696	0.0730435	1995	both	Community	Germany	High-income Western countries
DEU	DEU_1995_MONICA-AUG	2	62.5	210	29.2662	0.488015	0	0.37619	0.147619	1995	both	Community	Germany	High-income Western countries
DEU	DEU_1995_MONICA-AUG	1	27.5	194	24.5509	0.119103	0.0103093	0.0309278	0.00515464	1995	both	Community	Germany	High-income Western countries
DEU	DEU_1995_MONICA-AUG	1	35	488	26.3028	0.247802	0.00409836	0.143443	0.0204918	1995	both	Community	Germany	High-income Western countries
DEU	DEU_1995_MONICA-AUG	1	45	422	27.1794	0.180929	0.00236967	0.191943	0.035545	1995	both	Community	Germany	High-income Western countries
DEU	DEU_1995_MONICA-AUG	1	55	548	28.1016	0.142884	0.00364964	0.220803	0.0456204	1995	both	Community	Germany	High-income Western countries
DEU	DEU_1995_MONICA-AUG	1	62.5	246	28.6054	0.370246	0	0.317073	0.0447155	1995	both	Community	Germany	High-income Western countries
DMA	DMA_2007_STEPS	1	25	61	23.737	0.777363	0.0677333	0.0839409	0.0310247	2007	both	National	Dominica	Latin America and Caribbean
DMA	DMA_2007_STEPS	1	35	79	24.5652	0.696827	0.0890089	0.107766	0.0197549	2007	both	National	Dominica	Latin America and Caribbean
DMA	DMA_2007_STEPS	1	45	123	24.4463	0.469962	0.0507786	0.114819	0.0466866	2007	both	National	Dominica	Latin America and Caribbean
DMA	DMA_2007_STEPS	1	55	86	24.5222	0.436391	0.0618312	0.0781071	0.0117324	2007	both	National	Dominica	Latin America and Caribbean
DMA	DMA_2007_STEPS	1	62.5	43	24.1157	0.822133	0.0589499	0.144713	0	2007	both	National	Dominica	Latin America and Caribbean
DMA	DMA_2007_STEPS	2	25	77	27.2451	1.15102	0.0776217	0.276843	0.148488	2007	both	National	Dominica	Latin America and Caribbean
DMA	DMA_2007_STEPS	2	35	129	29.2819	0.756516	0.00880854	0.387729	0.189987	2007	both	National	Dominica	Latin America and Caribbean
DMA	DMA_2007_STEPS	2	45	128	29.0469	0.464973	0.0181528	0.412131	0.0826498	2007	both	National	Dominica	Latin America and Caribbean
DMA	DMA_2007_STEPS	2	55	108	30.0096	0.62289	0.00760771	0.412719	0.166556	2007	both	National	Dominica	Latin America and Caribbean
DMA	DMA_2007_STEPS	2	62.5	50	30.2983	1.69567	0.0619655	0.392649	0.255963	2007	both	National	Dominica	Latin America and Caribbean
DNK	DNK_1985_INTERSALT	1	25	24	23.6743	0.591684	0	0.0416667	0	1985	urban	Community	Denmark	High-income Western countries
DNK	DNK_1985_INTERSALT	1	35	25	25.84	0.784092	0.04	0.08	0	1985	urban	Community	Denmark	High-income Western countries
DNK	DNK_1985_INTERSALT	1	45	25	25.654	0.62921	0.04	0.08	0	1985	urban	Community	Denmark	High-income Western countries
DNK	DNK_1985_INTERSALT	1	55	25	25.4856	0.773833	0.04	0.16	0	1985	urban	Community	Denmark	High-income Western countries
DNK	DNK_1985_INTERSALT	2	25	25	23.1244	0.682083	0.04	0.04	0	1985	urban	Community	Denmark	High-income Western countries
DNK	DNK_1985_INTERSALT	2	35	25	22.4728	0.537248	0.04	0	0	1985	urban	Community	Denmark	High-income Western countries
DNK	DNK_1985_INTERSALT	2	45	25	25.4132	1.07667	0.04	0.2	0.12	1985	urban	Community	Denmark	High-income Western countries
DNK	DNK_1985_INTERSALT	2	55	25	24.5245	0.777073	0.04	0.08	0	1985	urban	Community	Denmark	High-income Western countries
DNK	DNK_1986_MONICA-GLOa	2	30	183	23.0748	0.283322	0.0546448	0.0382514	0.0163934	1986	urban	Community	Denmark	High-income Western countries
DNK	DNK_1986_MONICA-GLOa	2	40	192	23.9216	0.294511	0.0208333	0.0729167	0.0208333	1986	urban	Community	Denmark	High-income Western countries
DNK	DNK_1986_MONICA-GLOa	2	50	190	24.2966	0.287176	0.0157895	0.0789474	0.0210526	1986	urban	Community	Denmark	High-income Western countries
DNK	DNK_1986_MONICA-GLOa	2	60	188	25.2752	0.304245	0.0265958	0.117021	0.0265957	1986	urban	Community	Denmark	High-income Western countries
DNK	DNK_1986_MONICA-GLOa	1	30	174	24.3456	0.235388	0.0172414	0.091954	0	1986	urban	Community	Denmark	High-income Western countries
DNK	DNK_1986_MONICA-GLOa	1	40	193	25.3584	0.249756	0	0.0880829	0.015544	1986	urban	Community	Denmark	High-income Western countries
DNK	DNK_1986_MONICA-GLOa	1	50	187	26.1273	0.259366	0	0.117647	0.026738	1986	urban	Community	Denmark	High-income Western countries
DNK	DNK_1986_MONICA-GLOa	1	60	192	26.2821	0.278625	0.00520833	0.119792	0.0260417	1986	urban	Community	Denmark	High-income Western countries
DNK	DNK_1991_MONICA-GLOa	2	29.5	114	23.2877	0.395186	0.0701754	0.0438597	0.0350877	1991	urban	Community	Denmark	High-income Western countries
DNK	DNK_1991_MONICA-GLOa	2	35	214	24.1061	0.325772	0.046729	0.0981308	0.0373832	1991	urban	Community	Denmark	High-income Western countries
DNK	DNK_1991_MONICA-GLOa	2	45	212	24.4696	0.302036	0.0283019	0.108491	0.0330189	1991	urban	Community	Denmark	High-income Western countries
DNK	DNK_1991_MONICA-GLOa	2	55	164	25.4155	0.393989	0.0426829	0.158537	0.0487805	1991	urban	Community	Denmark	High-income Western countries
DNK	DNK_1991_MONICA-GLOa	2	61	112	25.3631	0.362022	0.0178571	0.142857	0.00892857	1991	urban	Community	Denmark	High-income Western countries
DNK	DNK_1991_MONICA-GLOa	1	29.5	114	25.2449	0.336723	0.00877193	0.122807	0	1991	urban	Community	Denmark	High-income Western countries
DNK	DNK_1991_MONICA-GLOa	1	35	197	24.7912	0.260432	0	0.0862944	0.0203046	1991	urban	Community	Denmark	High-income Western countries
DNK	DNK_1991_MONICA-GLOa	1	45	191	25.6025	0.265179	0.0157068	0.109948	0.0157068	1991	urban	Community	Denmark	High-income Western countries
DNK	DNK_1991_MONICA-GLOa	1	55	238	26.6142	0.231187	0	0.159664	0.0252101	1991	urban	Community	Denmark	High-income Western countries
DNK	DNK_1991_MONICA-GLOa	1	61	68	26.5924	0.422295	0	0.161765	0.0294118	1991	urban	Community	Denmark	High-income Western countries
DOM	DOM_1991_DHS	2	25	1242	23.0274	0.164403	0.0919325	0.0620981	0.0195428	1991	both	National	Dominican Republic	Latin America and Caribbean
DOM	DOM_1991_DHS	2	35	629	23.9961	0.220068	0.0874437	0.108623	0.0222495	1991	both	National	Dominican Republic	Latin America and Caribbean
DOM	DOM_1991_DHS	2	45	94	22.9963	0.513869	0.0914149	0.059202	0.0367149	1991	both	National	Dominican Republic	Latin America and Caribbean
DOM	DOM_1996_DHS	2	25	2440	23.8194	0.121528	0.0796329	0.0889922	0.0219662	1996	both	National	Dominican Republic	Latin America and Caribbean
DOM	DOM_1996_DHS	2	35	1984	25.5689	0.130736	0.0424931	0.165648	0.0474712	1996	both	National	Dominican Republic	Latin America and Caribbean
DOM	DOM_1996_DHS	2	45	1404	26.6297	0.183738	0.034809	0.233869	0.0660332	1996	both	National	Dominican Republic	Latin America and Caribbean
DOM	DOM_2013_DHS	1	25	2975	23.8379	0.108882	0.0525096	0.0873128	0.017598	2013	both	National	Dominican Republic	Latin America and Caribbean
DOM	DOM_2013_DHS	1	35	2255	25.9899	0.180799	0.0248429	0.179974	0.0493217	2013	both	National	Dominican Republic	Latin America and Caribbean
DOM	DOM_2013_DHS	1	45	1904	26.3083	0.152676	0.0206606	0.19854	0.0364159	2013	both	National	Dominican Republic	Latin America and Caribbean
DOM	DOM_2013_DHS	1	55	1403	25.9285	0.182576	0.032306	0.174465	0.0328013	2013	both	National	Dominican Republic	Latin America and Caribbean
DOM	DOM_2013_DHS	2	25	2788	24.9898	0.141691	0.0738024	0.154593	0.0548323	2013	both	National	Dominican Republic	Latin America and Caribbean
DOM	DOM_2013_DHS	2	35	2324	27.3507	0.144346	0.0286454	0.265545	0.0842912	2013	both	National	Dominican Republic	Latin America and Caribbean
DOM	DOM_2013_DHS	2	45	2081	28.1488	0.175013	0.021477	0.329262	0.112321	2013	both	National	Dominican Republic	Latin America and Caribbean
DZA	DZA_2003_STEPS	1	27.5	256	23.0279	0.220492	0.0742188	0.0546875	0.00390625	2003	both	Subnational	Algeria	Central Asia and North Africa-Middle East
DZA	DZA_2003_STEPS	1	35	472	23.7638	0.188829	0.0572034	0.0847458	0.00847458	2003	both	Subnational	Algeria	Central Asia and North Africa-Middle East
DZA	DZA_2003_STEPS	1	45	441	24.0248	0.198216	0.0566893	0.0839002	0.0136054	2003	both	Subnational	Algeria	Central Asia and North Africa-Middle East
DZA	DZA_2003_STEPS	1	55	319	24.6568	0.246545	0.0846395	0.115987	0.00626959	2003	both	Subnational	Algeria	Central Asia and North Africa-Middle East
DZA	DZA_2003_STEPS	1	62.5	124	24.8746	0.428422	0.0645161	0.120968	0.0403226	2003	both	Subnational	Algeria	Central Asia and North Africa-Middle East
DZA	DZA_2003_STEPS	2	27.5	468	24.5469	0.234532	0.0790598	0.134615	0.0491453	2003	both	Subnational	Algeria	Central Asia and North Africa-Middle East
DZA	DZA_2003_STEPS	2	35	778	25.4393	0.181447	0.0694087	0.18509	0.0359897	2003	both	Subnational	Algeria	Central Asia and North Africa-Middle East
DZA	DZA_2003_STEPS	2	45	644	26.9721	0.229195	0.0326087	0.259317	0.0931677	2003	both	Subnational	Algeria	Central Asia and North Africa-Middle East
DZA	DZA_2003_STEPS	2	55	391	27.3509	0.288001	0.0537084	0.29156	0.0997442	2003	both	Subnational	Algeria	Central Asia and North Africa-Middle East
DZA	DZA_2003_STEPS	2	62.5	156	26.0895	0.465238	0.0641026	0.224359	0.0769231	2003	both	Subnational	Algeria	Central Asia and North Africa-Middle East
DZA	DZA_2017_STEPS	1	25	526	23.8328	0.200089	0.0838927	0.0738939	0.016846	2017	both	National	Algeria	Central Asia and North Africa-Middle East
DZA	DZA_2017_STEPS	1	35	731	25.6119	0.188607	0.034129	0.153975	0.0336267	2017	both	National	Algeria	Central Asia and North Africa-Middle East
DZA	DZA_2017_STEPS	1	45	782	26.478	0.182034	0.0237983	0.196743	0.0401733	2017	both	National	Algeria	Central Asia and North Africa-Middle East
DZA	DZA_2017_STEPS	1	55	519	26.4767	0.229375	0.0118034	0.176223	0.0446883	2017	both	National	Algeria	Central Asia and North Africa-Middle East
DZA	DZA_2017_STEPS	1	65	334	26.0632	0.240164	0.0183018	0.152915	0.0150929	2017	both	National	Algeria	Central Asia and North Africa-Middle East
DZA	DZA_2017_STEPS	2	25	667	25.1352	0.221282	0.0672031	0.160619	0.0540502	2017	both	National	Algeria	Central Asia and North Africa-Middle East
DZA	DZA_2017_STEPS	2	35	935	27.9245	0.173263	0.018113	0.319028	0.0961973	2017	both	National	Algeria	Central Asia and North Africa-Middle East
DZA	DZA_2017_STEPS	2	45	869	29.087	0.208846	0.0195613	0.39012	0.140385	2017	both	National	Algeria	Central Asia and North Africa-Middle East
DZA	DZA_2017_STEPS	2	55	597	29.8757	0.302878	0.00636321	0.42541	0.168279	2017	both	National	Algeria	Central Asia and North Africa-Middle East
DZA	DZA_2017_STEPS	2	65	448	28.6526	0.29594	0.0222795	0.367221	0.136531	2017	both	National	Algeria	Central Asia and North Africa-Middle East
ECU	ECU_2004_RHS	2	25	1948	25.1865	0.114557	0.0235812	0.114546	0.018069	2004	both	National	Ecuador	Latin America and Caribbean
ECU	ECU_2004_RHS	2	35	1296	27.1113	0.151344	0.00613502	0.210862	0.057744	2004	both	National	Ecuador	Latin America and Caribbean
ECU	ECU_2004_RHS	2	45	298	27.5087	0.27406	0.00456211	0.219669	0.0352781	2004	both	National	Ecuador	Latin America and Caribbean
ECU	ECU_2010_SABE	1	65	1164	26.1031	0.397969	0.0230463	0.143746	0.0208751	2010	both	National	Ecuador	Latin America and Caribbean
ECU	ECU_2010_SABE	1	75	796	24.9972	0.573227	0.0279302	0.094409	0.0153798	2010	both	National	Ecuador	Latin America and Caribbean
ECU	ECU_2010_SABE	2	65	1272	27.8118	0.732086	0.0108109	0.292661	0.0828716	2010	both	National	Ecuador	Latin America and Caribbean
ECU	ECU_2010_SABE	2	75	871	27.0691	0.731079	0.0341561	0.238681	0.0451994	2010	both	National	Ecuador	Latin America and Caribbean
EGY	EGY_1992_DHS	2	25	2265	25.7836	0.136037	0.0187135	0.167936	0.0476998	1992	both	National	Egypt	Central Asia and North Africa-Middle East
EGY	EGY_1992_DHS	2	35	1889	27.8388	0.190945	0.0119167	0.301305	0.115964	1992	both	National	Egypt	Central Asia and North Africa-Middle East
EGY	EGY_1992_DHS	2	45	500	28.9149	0.350496	0.0109712	0.353066	0.166659	1992	both	National	Egypt	Central Asia and North Africa-Middle East
EGY	EGY_1995_DHS	2	25	3182	25.5255	0.133248	0.0184727	0.150533	0.0378001	1995	both	National	Egypt	Central Asia and North Africa-Middle East
EGY	EGY_1995_DHS	2	35	2654	27.1814	0.154473	0.0133492	0.257489	0.0952657	1995	both	National	Egypt	Central Asia and North Africa-Middle East
EGY	EGY_1995_DHS	2	45	663	27.6862	0.282677	0.0103075	0.297062	0.118337	1995	both	National	Egypt	Central Asia and North Africa-Middle East
EGY	EGY_2000_DHS	2	25	4189	27.3412	0.114065	0.0072447	0.24833	0.0616472	2000	both	National	Egypt	Central Asia and North Africa-Middle East
EGY	EGY_2000_DHS	2	35	5007	29.5397	0.118502	0.00468719	0.427329	0.140413	2000	both	National	Egypt	Central Asia and North Africa-Middle East
EGY	EGY_2000_DHS	2	45	4406	31.385	0.141921	0.00514511	0.563483	0.255426	2000	both	National	Egypt	Central Asia and North Africa-Middle East
EGY	EGY_2003_DHS	2	25	2593	26.4538	0.104544	0.00994857	0.157233	0.027587	2003	both	National	Egypt	Central Asia and North Africa-Middle East
EGY	EGY_2003_DHS	2	35	2789	28.5979	0.110114	0.00572859	0.352897	0.0732682	2003	both	National	Egypt	Central Asia and North Africa-Middle East
EGY	EGY_2003_DHS	2	45	2548	30.9961	0.134127	0.00237826	0.576345	0.184251	2003	both	National	Egypt	Central Asia and North Africa-Middle East
EGY	EGY_2005_DHS	2	25	5538	27.5659	0.100052	0.0069147	0.276479	0.0714432	2005	both	National	Egypt	Central Asia and North Africa-Middle East
EGY	EGY_2005_DHS	2	35	5947	30.2548	0.119372	0.00473581	0.485142	0.171115	2005	both	National	Egypt	Central Asia and North Africa-Middle East
EGY	EGY_2005_DHS	2	45	5379	32.7835	0.147995	0.00206964	0.659728	0.326524	2005	both	National	Egypt	Central Asia and North Africa-Middle East
EGY	EGY_2005_STEPS	1	25	1336	25.3582	0.121996	0.0209581	0.116018	0.0284431	2005	both	National	Egypt	Central Asia and North Africa-Middle East
EGY	EGY_2005_STEPS	1	35	1017	27.3318	0.165068	0.013766	0.239921	0.079646	2005	both	National	Egypt	Central Asia and North Africa-Middle East
EGY	EGY_2005_STEPS	1	45	839	28.1281	0.201757	0.0190703	0.306317	0.0977354	2005	both	National	Egypt	Central Asia and North Africa-Middle East
EGY	EGY_2005_STEPS	1	55	539	28.5048	0.225314	0.012987	0.356215	0.113173	2005	both	National	Egypt	Central Asia and North Africa-Middle East
EGY	EGY_2005_STEPS	1	63	214	27.8957	0.384047	0.0186916	0.271028	0.130841	2005	both	National	Egypt	Central Asia and North Africa-Middle East
EGY	EGY_2005_STEPS	2	25	1323	27.0141	0.161122	0.026455	0.251701	0.0937264	2005	both	National	Egypt	Central Asia and North Africa-Middle East
EGY	EGY_2005_STEPS	2	35	945	29.944	0.206057	0.0031746	0.451852	0.166138	2005	both	National	Egypt	Central Asia and North Africa-Middle East
EGY	EGY_2005_STEPS	2	45	801	31.3572	0.218401	0.00998752	0.550562	0.260924	2005	both	National	Egypt	Central Asia and North Africa-Middle East
EGY	EGY_2005_STEPS	2	55	511	31.969	0.297572	0.00587084	0.559687	0.307241	2005	both	National	Egypt	Central Asia and North Africa-Middle East
EGY	EGY_2005_STEPS	2	63	189	30.0675	0.500733	0.00529101	0.417989	0.216931	2005	both	National	Egypt	Central Asia and North Africa-Middle East
EGY	EGY_2008_DHS	1	25	1625	25.0416	0.131335	0.0229356	0.127368	0.0319864	2008	both	National	Egypt	Central Asia and North Africa-Middle East
EGY	EGY_2008_DHS	1	35	1148	26.7545	0.139266	0.00577579	0.199542	0.0366529	2008	both	National	Egypt	Central Asia and North Africa-Middle East
EGY	EGY_2008_DHS	1	45	1048	27.6611	0.15768	0.0131183	0.283887	0.0688908	2008	both	National	Egypt	Central Asia and North Africa-Middle East
EGY	EGY_2008_DHS	1	55	746	27.8582	0.206695	0.018501	0.284443	0.0964388	2008	both	National	Egypt	Central Asia and North Africa-Middle East
EGY	EGY_2008_DHS	2	25	5555	26.6938	0.0750678	0.0100454	0.201724	0.0461937	2008	both	National	Egypt	Central Asia and North Africa-Middle East
EGY	EGY_2008_DHS	2	35	4997	29.6539	0.0944831	0.00477466	0.433845	0.135687	2008	both	National	Egypt	Central Asia and North Africa-Middle East
EGY	EGY_2008_DHS	2	45	4690	31.3322	0.103871	0.00246923	0.564888	0.232073	2008	both	National	Egypt	Central Asia and North Africa-Middle East
EGY	EGY_2011_STEPS	1	25	347	25.6887	0.46672	0.0161163	0.132418	0.0348967	2011	both	National	Egypt	Central Asia and North Africa-Middle East
EGY	EGY_2011_STEPS	1	35	360	26.8309	1.08349	0.0950537	0.229046	0.093556	2011	both	National	Egypt	Central Asia and North Africa-Middle East
EGY	EGY_2011_STEPS	1	45	385	28.6075	0.543082	0.01448	0.362535	0.118178	2011	both	National	Egypt	Central Asia and North Africa-Middle East
EGY	EGY_2011_STEPS	1	55	305	29.4769	0.341661	0.00551134	0.368166	0.0974273	2011	both	National	Egypt	Central Asia and North Africa-Middle East
EGY	EGY_2011_STEPS	1	63	179	28.0578	0.463049	0.00315063	0.385663	0.0696276	2011	both	National	Egypt	Central Asia and North Africa-Middle East
EGY	EGY_2011_STEPS	2	25	651	26.95	0.392691	0.00739708	0.235096	0.086933	2011	both	National	Egypt	Central Asia and North Africa-Middle East
EGY	EGY_2011_STEPS	2	35	637	31.4081	0.530342	0.00268863	0.566284	0.286075	2011	both	National	Egypt	Central Asia and North Africa-Middle East
EGY	EGY_2011_STEPS	2	45	597	33.556	0.389699	0	0.691487	0.40142	2011	both	National	Egypt	Central Asia and North Africa-Middle East
EGY	EGY_2011_STEPS	2	55	544	33.9336	0.783733	0.000568317	0.676793	0.430411	2011	both	National	Egypt	Central Asia and North Africa-Middle East
EGY	EGY_2011_STEPS	2	63	326	32.653	0.863552	0.0102877	0.578652	0.359164	2011	both	National	Egypt	Central Asia and North Africa-Middle East
EGY	EGY_2014_DHS	2	25	6311	28.2589	0.0925453	0.00453177	0.3171	0.0804764	2014	both	National	Egypt	Central Asia and North Africa-Middle East
EGY	EGY_2014_DHS	2	35	7024	30.6404	0.0986087	0.00142507	0.508032	0.178155	2014	both	National	Egypt	Central Asia and North Africa-Middle East
EGY	EGY_2014_DHS	2	45	5556	32.4831	0.117082	0.00156125	0.651962	0.273124	2014	both	National	Egypt	Central Asia and North Africa-Middle East
EGY	EGY_2015_DHS	1	25	1809	25.882	0.148505	0.0162191	0.168478	0.0481352	2015	both	National	Egypt	Central Asia and North Africa-Middle East
EGY	EGY_2015_DHS	1	35	1762	27.7326	0.158843	0.00896241	0.297745	0.0747777	2015	both	National	Egypt	Central Asia and North Africa-Middle East
EGY	EGY_2015_DHS	1	45	1326	28.8332	0.189405	0.00367287	0.383671	0.110172	2015	both	National	Egypt	Central Asia and North Africa-Middle East
EGY	EGY_2015_DHS	1	55	1112	29.485	0.219	0.00870038	0.428132	0.145515	2015	both	National	Egypt	Central Asia and North Africa-Middle East
EGY	EGY_2015_DHS	2	25	2303	28.2759	0.152249	0.0123009	0.337342	0.121213	2015	both	National	Egypt	Central Asia and North Africa-Middle East
EGY	EGY_2015_DHS	2	35	2079	31.7964	0.179971	0.00429937	0.593745	0.297588	2015	both	National	Egypt	Central Asia and North Africa-Middle East
EGY	EGY_2015_DHS	2	45	1509	34.5791	0.221378	0.000337031	0.738174	0.452519	2015	both	National	Egypt	Central Asia and North Africa-Middle East
EGY	EGY_2015_DHS	2	55	1250	35.1386	0.274164	0.0011191	0.751784	0.483913	2015	both	National	Egypt	Central Asia and North Africa-Middle East
[truncated: 3,906 more rows]
